# Supplementary material for: Targeted suppression of siRNA biogenesis in Arabidopsis pollen reveals distinct Pol IV activities in the sperm and vegetative cell lineages
Source: Research Square preprint supplement (doi:10.21203/rs.3.rs-2947716/v1), 2023-05-31
Supplement: Supplementary file 1 [file 78c2e7dc9fb3e558ce0136d0.xlsx]

## Sheet: Hypo CHH DMRs in nrpd1a-3 FTL
Hypomethylated CHH DMRs in nrpd1a-3 FTL
chr	start	end	WT FTL (pollen)	nrpd1a-3 FTL (pollen)	WT Col-0 (pollen)	VC-RTL (pollen)	SC-RTL (pollen)	WT Col-0 (seedling)	nrpd1a-3 (seedling)	p35S::RTL1 (seedling)
Chr1	256100	256300	0.466642	0.25461	0.421295	0.340312	0.461409	0.241568	0.0057072	0.0819841
Chr1	540700	540900	0.61761	0.386964	0.541064	0.477427	0.508669	0.200037	0.00555557	0.0204248
Chr1	587500	588000	0.608754	0.364805	0.479767	0.523808	0.616944	0.310037	0.0872572	0.0882524
Chr1	696900	697300	0.491092	0.206614	0.280039	0.224108	0.330245	0.149856	0.00398126	0.0929635
Chr1	888700	888900	0.428773	0.194113	0.378238	0.274804	0.287063	0.252529	0.0131313	0.0247799
Chr1	1276100	1276600	0.42316	0.195662	0.342471	0.214262	0.303615	0.283992	0.0376982	0.0560126
Chr1	1523100	1523400	0.364394	0.142205	0.293624	0.32306	0.173133	0.0685441	0.0105988	0.0648114
Chr1	1976500	1977100	0.506474	0.309654	0.498983	0.393581	0.430899	0.14677	0.0233726	0.0475298
Chr1	2587500	2587800	0.414071	0.198202	0.424029	0.232478	0.333698	0.118093	0.00680271	0.0391231
Chr1	3074000	3074300	0.52184	0.347364	0.438054	0.386856	0.400438	0.0830654	0.00571429	0.0515774
Chr1	3342700	3343000	0.36005	0.140511	0.326541	0.315067	0.342782	0.16158	0.0255914	0.0618437
Chr1	4112100	4112500	0.455855	0.257734	0.43906	0.406833	0.325431	0.273298	0.0576769	0.0689931
Chr1	4407400	4407900	0.502142	0.320467	0.331268	0.292042	0.390317	0.245403	0.0828972	0.148835
Chr1	4409600	4410200	0.462036	0.240444	0.493576	0.336061	0.406953	0.108353	0.0410369	0.029931
Chr1	4583100	4583400	0.481805	0.26853	0.350561	0.15208	0.389894	0.0877659	0.00884691	0.0559543
Chr1	4770300	4770700	0.589563	0.366418	0.58268	0.500381	0.592381	0.334042	0.0833469	0.115608
Chr1	4786800	4787200	0.515432	0.288389	0.422478	0.33853	0.395926	0.223277	0.0402299	0.0324537
Chr1	4966600	4966900	0.488193	0.233926	0.404716	0.410369	0.502694	0.261904	0.0273755	0.0450295
Chr1	5531300	5531700	0.491111	0.237762	0.469715	0.411229	0.470746	0.415191	0.0358554	0.0858308
Chr1	5657500	5657800	0.416725	0.19618	0.427022	0.289721	0.425267	0.13279	0.0195362	0.0315657
Chr1	5863300	5863500	0.67092	0.394456	0.666583	0.704315	0.645329	0.485515	0.0767832	0.195606
Chr1	6074900	6075400	0.47492	0.269749	0.550115	0.389027	0.449741	0.287	0.069259	0.0548344
Chr1	6218600	6219200	0.513565	0.337606	0.518563	0.425406	0.465624	0.378905	0.116241	0.0921131
Chr1	6236800	6237200	0.612197	0.412838	0.460212	0.450052	0.53479	0.134422	0.0838057	0.0975163
Chr1	6454900	6455100	0.36918	0.144401	0.282255	0.221328	0.293771	0.08574	0.0251831	0.0288124
Chr1	6538700	6539400	0.583076	0.442946	0.582344	0.414084	0.57252	0.226332	0.0806528	0.100624
Chr1	6736100	6736400	0.527936	0.300075	0.460738	0.277181	0.494175	0.0991564	0.023492	0.0119048
Chr1	7036100	7036800	0.552083	0.357455	0.477671	0.406742	0.483577	0.219261	0.0373638	0.0484003
Chr1	7201700	7201900	0.474149	0.206894	0.154547	0.142196	0.134641	0.125377	0.0129125	0.0413763
Chr1	7281800	7282400	0.496538	0.261174	0.505585	0.299529	0.398836	0.248784	0.0366969	0.0884874
Chr1	7722100	7722400	0.455239	0.250201	0.393556	0.455851	0.385928	0.428014	0.108906	0.0819066
Chr1	7833500	7833900	0.403981	0.229452	0.32137	0.230382	0.372706	0.217844	0.0196569	0.0347147
Chr1	8114900	8116700	0.495407	0.341734	0.476055	0.433598	0.446564	0.221842	0.0145718	0.0456717
Chr1	8169400	8169600	0.384515	0.149517	0.348844	0.282342	0.360852	0.268893	0.00297619	0.0668229
Chr1	8236300	8236800	0.19618	0.0352562	0.116908	0.105189	0.114037	0.155441	0.0288493	0.0185714
Chr1	8291100	8291500	0.367494	0.184932	0.33365	0.22667	0.260963	0.0775778	0.00617285	0.0184762
Chr1	8457600	8457900	0.337512	0.0851906	0.156101	0.0535714	0.132576	0.267492	0.153358	0.214819
Chr1	8539000	8539400	0.416376	0.219992	0.363851	0.282408	0.334619	0.182313	0.0163265	0.0251777
Chr1	9005500	9005800	0.272863	0.105316	0.0810649	0.141692	0.0663793	0.167544	0.0657792	0.104862
Chr1	9205000	9205200	0.529441	0.261408	0.444373	0.366782	0.21382	0.22298	0.0271378	0.03332
Chr1	9755200	9755600	0.500955	0.303902	0.484244	0.328852	0.4092	0.188805	0.0128804	0.0131638
Chr1	9756500	9756700	0.313965	0.0880874	0.236504	0.209415	0.101229	0.0894602	0.0159389	0.0161877
Chr1	9817200	9817800	0.525816	0.360086	0.492088	0.347156	0.439015	0.220451	0.0457458	0.0483062
Chr1	9818100	9818300	0.486402	0.250065	0.419598	0.263842	0.343819	0.279455	0.0233495	0.100144
Chr1	9865400	9865600	0.575481	0.276013	0.540119	0.454699	0.480819	0.184376	0.0166667	0.109876
Chr1	10239900	10240200	0.474753	0.276761	0.385493	0.371341	0.3667	0.169534	0.0161917	0.0597551
Chr1	10348000	10348300	0.309599	0.159529	0.33154	0.163994	0.329459	0.191665	0.123268	0.118234
Chr1	10591400	10591800	0.477552	0.206302	0.46281	0.348782	0.472564	0.227723	0.0548191	0.0313861
Chr1	10652600	10652800	0.46718	0.158337	0.356986	0.306746	0.477771	0.34376	0.0539245	0.0744951
Chr1	10867200	10867500	0.357462	0.174902	0.268444	0.204645	0.272081	0.177583	0.010178	0.0113192
Chr1	10931000	10931300	0.470605	0.198988	0.410795	0.382835	0.382746	0.118467	0.0193782	0.0517291
Chr1	10932200	10932400	0.541238	0.204742	0.325433	0.265876	0.352713	0.0845408	0.0316151	0.0285761
Chr1	11700100	11700800	0.582143	0.330693	0.479493	0.44	0.530759	0.146378	0.0202167	0.0418518
Chr1	11701200	11701700	0.432273	0.20697	0.492579	0.313617	0.372832	0.145589	0	0.0112576
Chr1	11803800	11804000	0.551833	0.241454	0.454674	0.422935	0.429828	0.159897	0.00340073	0.0274414
Chr1	11895800	11896100	0.405061	0.143257	0.284995	0.114457	0.266626	0.201166	0.0603969	0.0908043
Chr1	12240600	12240900	0.532571	0.288745	0.376119	0.331943	0.439038	0.299718	0.0945642	0.114644
Chr1	12500400	12500600	0.49627	0.175526	0.393935	0.252169	0.254822	0.168033	0.00416667	0.0353038
Chr1	12562900	12563200	0.553301	0.266597	0.516325	0.343756	0.490916	0.200375	0.034189	0.0210827
Chr1	12618800	12619100	0.266688	0.0275634	0.256912	0.0906859	0.29109	0.0169303	0.0054945	0.00966578
Chr1	12855000	12855200	0.465431	0.233415	0.458792	0.329812	0.413236	0.149867	0.033215	0.0464303
Chr1	13017100	13017600	0.528417	0.314885	0.529646	0.327251	0.466422	0.107181	0.0139605	0.0365583
Chr1	13058800	13059100	0.372642	0.152726	0.317761	0.35328	0.3894	0.121618	0	0.0360465
Chr1	13059500	13060400	0.583376	0.354053	0.489927	0.363323	0.469105	0.151491	0.0179696	0.0474308
Chr1	13495600	13495900	0.414082	0.143856	0.352918	0.190899	0.443244	0.119743	0.0445528	0.062896
Chr1	13507600	13508000	0.358738	0.193866	0.307302	0.192042	0.312144	0.189636	0.113289	0.142719
Chr1	13905200	13905900	0.317084	0.13351	0.335924	0.20465	0.20568	0.0632055	0.0326627	0.0665294
Chr1	14011600	14011800	0.499747	0.226288	0.320122	0.228146	0.305751	0.0724416	0.00569561	0.00915032
Chr1	14299200	14299500	0.551595	0.254896	0.444948	0.345979	0.412632	0.097551	0.00444444	0.0398663
Chr1	14737600	14737900	0.311224	0.0738889	0.286731	0	0.180015	0.122153	0.0690972	0.0722222
Chr1	15126900	15127200	0.251	0.0844444	0.130952	0.287879	0.566667	0.11647	0.187088	0.228589
Chr1	15635300	15635500	0.679516	0.423274	0.656074	0.507656	0.57254	0.0335813	0	0.0455523
Chr1	15939400	15939700	0.461226	0.222848	0.406817	0.331184	0.365646	0.0625608	0	0.0211934
Chr1	15940900	15941100	0.631154	0.223613	0.523635	0.284188	0.61807	0.096418	0.0141626	0.214861
Chr1	16325500	16326500	0.342622	0.148687	0.274445	0.176811	0.274672	0.0791069	0.0103886	0.0416988
Chr1	16400800	16401000	0.658194	0.404954	0.603955	0.374978	0.587323	0.290733	0.101559	0.158767
Chr1	16592500	16592900	0.362387	0.110341	0.315986	0.169588	0.3726	0.121489	0.0106383	0.0430996
Chr1	16806500	16807000	0.458775	0.228547	0.374868	0.292409	0.43613	0.103424	0.00677083	0.0347152
Chr1	16825000	16825200	0.623896	0.367162	0.554377	0.439781	0.465741	0.155045	0.00555557	0.0166667
Chr1	16825900	16826200	0.350991	0.143206	0.238892	0.265534	0.294997	0.0901002	0.00757575	0.00595238
Chr1	16904100	16904400	0.371318	0.166891	0.269441	0.255997	0.254611	0.116121	0.00643939	0.0177109
Chr1	16966500	16966900	0.374613	0.162419	0.268137	0.191481	0.320311	0.0949069	0.0290831	0.0206526
Chr1	16967800	16968100	0.284737	0.0484912	0.25478	0.197811	0.175344	0.0568879	0.00953017	0.013964
Chr1	16988200	16988400	0.427028	0.187895	0.355332	0.155744	0.305108	0.152738	0.0224215	0.0347194
Chr1	16989100	16989500	0.416068	0.233694	0.365585	0.190923	0.282698	0.0899432	0.0102721	0.0480934
Chr1	17502500	17502800	0.509409	0.338061	0.411918	0.403602	0.459936	0.350388	0.0765884	0.146102
Chr1	17552100	17552600	0.403962	0.225884	0.403337	0.257184	0.380015	0.075231	0.036102	0.036459
Chr1	17605500	17605900	0.42212	0.190726	0.376372	0.344997	0.431921	0.274782	0.0358157	0.064518
Chr1	17714300	17714500	0.52087	0.24721	0.34215	0.281898	0.199809	0.253699	0.0533556	0.108471
Chr1	17900100	17900500	0.449786	0.252952	0.40778	0.361849	0.407887	0.209651	0.00666668	0.0515598
Chr1	18320600	18320900	0.283449	0.102455	0.393886	0.224464	0.38905	0.461012	0.01652	0.0809614
Chr1	18551600	18552100	0.354275	0.12575	0.2726	0.185118	0.233055	0.170076	0.0180871	0.0292544
Chr1	18626800	18627300	0.329538	0.138097	0.251888	0.190144	0.335302	0.384707	0.0199751	0.0951225
Chr1	18790200	18790700	0.503505	0.253646	0.416654	0.301585	0.42815	0.143198	0.0518128	0.080704
Chr1	18791200	18791400	0.520609	0.291708	0.578942	0.223642	0.405642	0.130813	0.0103175	0.0281746
Chr1	19064300	19064500	0.601985	0.332061	0.699581	0.338545	0.664688	0.25069	0.0219618	0.0545734
Chr1	19173000	19173800	0.489508	0.257977	0.425211	0.373862	0.484857	0.162951	0.0171319	0.0682762
Chr1	19327300	19327500	0.544165	0.310902	0.502594	0.449919	0.666474	0.223426	0.018078	0.0569139
Chr1	19769100	19769300	0.381734	0.118283	0.411648	0.272288	0.390236	0.0912177	0.0208333	0.00699301
Chr1	19780500	19780700	0.340087	0.116629	0.273012	0.220777	0.35155	0.208862	0.00719095	0.0730409
Chr1	19994400	19995300	0.620282	0.370468	0.599417	0.42707	0.531279	0.282107	0.0438145	0.0631094
Chr1	20278500	20278700	0.562938	0.262538	0.381266	0.343845	0.436149	0.153895	0.0111416	0.0649908
Chr1	21335900	21336100	0.452028	0.159089	0.43465	0.378552	0.462207	0.253783	0.0210859	0.0875375
Chr1	21428200	21428500	0.441034	0.203543	0.372139	0.350546	0.439148	0.284632	0.0204595	0.0597809
Chr1	21529400	21529700	0.323126	0.164147	0.238704	0.3355	0.351675	0.683155	0.0100554	0.0517249
Chr1	21739200	21739600	0.538819	0.241549	0.433302	0.391203	0.382451	0.147038	0.0271206	0.0673781
Chr1	21918600	21919000	0.529681	0.352808	0.512123	0.47474	0.502551	0.208344	0.0601069	0.050102
Chr1	22163600	22163800	0.494229	0.22985	0.459356	0.112112	0.30231	0.247224	0.0617804	0.151881
Chr1	22621200	22622300	0.521559	0.326105	0.556623	0.462072	0.514541	0.159968	0.0360852	0.0584699
Chr1	22828700	22829000	0.425332	0.170965	0.410544	0.338435	0.325469	0.206215	0.0654311	0.0859668
Chr1	22993200	22994000	0.501705	0.316785	0.545549	0.34983	0.459719	0.179831	0.0287276	0.0433711
Chr1	23125300	23125600	0.618939	0.365798	0.61445	0.494617	0.636435	0.23364	0.0455239	0.0837038
Chr1	23174100	23174700	0.600715	0.32026	0.488432	0.483744	0.443469	0.215719	0.0424482	0.0416011
Chr1	23214900	23215400	0.448944	0.200081	0.382949	0.255425	0.345244	0.220968	0.0255177	0.0326422
Chr1	23553800	23554100	0.606446	0.301853	0.50657	0.442593	0.624373	0.301446	0.0703193	0.0761046
Chr1	23710800	23711300	0.465326	0.213202	0.362655	0.249732	0.350306	0.231008	0.112911	0.0967572
Chr1	23876800	23877200	0.451144	0.190662	0.359452	0.235476	0.417081	0.179047	0.00578231	0.0458931
Chr1	24027200	24027800	0.493654	0.312507	0.544221	0.420264	0.476826	0.238669	0.0262754	0.0575363
Chr1	24577200	24577400	0.55782	0.285819	0.510826	0.421971	0.582493	0.631616	0.0792906	0.108987
Chr1	24645900	24646100	0.588118	0.346765	0.526303	0.473853	0.462636	0.295541	0.023464	0.0967324
Chr1	24718500	24718800	0.465039	0.253671	0.49948	0.394894	0.55651	0.320686	0.0553119	0.0715258
Chr1	24733100	24733300	0.440271	0.179876	0.416666	0.272344	0.264199	0.290804	0.0150227	0.100644
Chr1	24741500	24741700	0.666528	0.43532	0.551011	0.536723	0.665474	0.0196267	0.0123675	0.0226635
Chr1	25357900	25358300	0.389856	0.177609	0.413295	0.245057	0.389429	0.225249	0.0347967	0.0526789
Chr1	25779700	25780300	0.556049	0.335059	0.50232	0.448943	0.463762	0.388004	0.0683361	0.08157
Chr1	26169500	26170100	0.466281	0.238134	0.441188	0.318014	0.296061	0.216679	0.0126281	0.0639024
Chr1	26170700	26171500	0.489755	0.269862	0.400484	0.260659	0.351475	0.180449	0.0329046	0.0353939
Chr1	26880400	26880900	0.436617	0.226607	0.459114	0.385247	0.444717	0.293365	0.0627007	0.0824838
Chr1	27240900	27241200	0.623375	0.456925	0.617615	0.481745	0.635796	0.263686	0.0838706	0.102472
Chr1	28161200	28161500	0.531806	0.284041	0.524692	0.454933	0.550165	0.186673	0.0242198	0.0798664
Chr1	28161800	28162200	0.486206	0.215615	0.514224	0.380742	0.390836	0.222043	0.0450269	0.0183156
Chr1	28828200	28828600	0.248989	0.108893	0.255071	0.138623	0.229488	0.111162	0.041452	0.0472261
Chr1	29125700	29125900	0.572364	0.269677	0.594997	0.500225	0.542787	0.505548	0.152969	0.21014
Chr1	29320000	29320600	0.571601	0.346385	0.465193	0.388014	0.538988	0.242237	0.0110023	0.0388608
Chr1	30254400	30254700	0.559124	0.389731	0.540102	0.513131	0.513789	0.328275	0.108985	0.0600586
Chr2	257600	257800	0.345392	0.0875761	0.357605	0.0780869	0.0967353	0.00354091	0.00375939	0.00344828
Chr2	394600	394800	0.430892	0.188016	0.42803	0.284342	0.33289	0.202233	0	0.0145834
Chr2	395400	395900	0.553233	0.334384	0.656895	0.421294	0.436906	0.242852	0.0335824	0.0455896
Chr2	500800	501600	0.488906	0.343019	0.438928	0.376475	0.488643	0.203744	0.0280925	0.0643477
Chr2	542900	543400	0.559835	0.328423	0.516695	0.406526	0.54706	0.187236	0.0265436	0.00951576
Chr2	543900	544100	0.463927	0.202245	0.608734	0.25895	0.424113	0.320682	0.0107843	0.00793651
Chr2	709500	710000	0.382819	0.165426	0.272472	0.371324	0.291793	0.133478	0.0051282	0.0923561
Chr2	795200	795600	0.501553	0.281532	0.370413	0.307213	0.336212	0.0743501	0.0255478	0.0310009
Chr2	878300	878500	0.386077	0.137966	0.211334	0.183789	0.244441	0.0178129	0.0127782	0.0108968
Chr2	910400	910600	0.582031	0.248082	0.435279	0.329038	0.42846	0.170626	0	0.0158163
Chr2	912500	913300	0.393792	0.201455	0.341545	0.279216	0.35298	0.146364	0.080001	0.129762
Chr2	1038200	1038800	0.43799	0.197495	0.369041	0.271086	0.361152	0.248288	0.0298885	0.0437505
Chr2	1241400	1242100	0.466809	0.243597	0.37492	0.28184	0.355316	0.111067	0.0644252	0.0205446
Chr2	1396000	1396300	0.512741	0.305145	0.407271	0.305128	0.338002	0.0805757	0.030609	0.0275639
Chr2	1398000	1398400	0.478402	0.271981	0.488284	0.34773	0.3906	0.12018	0.0377252	0.121676
Chr2	1399200	1399500	0.532701	0.364195	0.483493	0.388309	0.562066	0.252745	0.140482	0.127541
Chr2	1409800	1410000	0.334991	0.106425	0.214217	0.168422	0.321996	0.10215	0.00222222	0.0318987
Chr2	1617200	1617400	0.522468	0.220539	0.495324	0.314871	0.355499	0.174628	0.0403724	0.103748
Chr2	1734800	1735000	0.405673	0.15713	0.276108	0.221888	0.291648	0.229475	0.00724639	0.0203726
Chr2	1902900	1903100	0.399846	0.121367	0.359597	0.200686	0.350489	0.594079	0.123701	0.116878
Chr2	1947900	1948300	0.326305	0.164544	0.34373	0.149957	0.260049	0.160667	0.00767562	0.0330415
Chr2	2065700	2065900	0.59598	0.363788	0.584382	0.543506	0.45529	0.0773453	0.0577013	0.0233594
Chr2	2262200	2262400	0.532138	0.242198	0.373804	0.400811	0.324372	0.212871	0.0495904	0.0298332
Chr2	2285400	2285700	0.435164	0.190327	0.316458	0.199361	0.227822	0.0868805	0.0249543	0.0334936
Chr2	2535500	2535700	0.59878	0.290289	0.414495	0.471495	0.534649	0.0280327	0.0237416	0.0378866
Chr2	2696400	2696600	0.392658	0.141293	0.230449	0.172108	0.235989	0.250048	0.164947	0.123299
Chr2	2850000	2850400	0.336356	0.103713	0.223138	0.188198	0.209342	0.0894069	0.00551948	0.0240481
Chr2	2962500	2962700	0.386053	0.14338	0.225037	0.208805	0.307682	0.0951262	0.0360317	0.0185155
Chr2	3194800	3195100	0.236559	0.0306693	0.199994	0.100522	0.179529	0.162591	0.0261761	0.046899
Chr2	4025400	4025700	0.39686	0.147881	0.266853	0.258294	0.285397	0.114621	0.0302885	0.011605
Chr2	4472200	4472400	0.5149	0.272846	0.535115	0.580897	0.455245	0.105547	0.00609462	0.0354715
Chr2	5409200	5409500	0.292666	0.0519461	0.228545	0.167101	0.272531	0.0891545	0.00909091	0.066312
Chr2	5806800	5807000	0.458253	0.189945	0.408074	0.237751	0.335782	0.179341	0.0748798	0.0883887
Chr2	5807600	5807900	0.494847	0.366492	0.41174	0.328186	0.194103	0.132395	0.0105269	0.090483
Chr2	5841500	5841700	0.439846	0.16587	0.244456	0.314982	0.265173	0.0844005	0.0104762	0.0194445
Chr2	6206900	6207100	0.547845	0.155068	0.613668	0.359509	0.427837	0.0526927	0.00761648	0.0929618
Chr2	6288300	6288900	0.521399	0.281197	0.448892	0.334363	0.401036	0.265477	0.0105076	0.0677982
Chr2	6383700	6384100	0.287244	0.115376	0.294279	0.269542	0.264566	0.0283364	0.0117607	0.010693
Chr2	6538700	6539100	0.282926	0.0909185	0.154385	0.126776	0.109266	0.0298796	0.00924253	0.0196585
Chr2	6583600	6584100	0.390281	0.206315	0.367717	0.250837	0.285056	0.104274	0.0364695	0.107665
Chr2	6659600	6660200	0.384647	0.12698	0.349239	0.182377	0.259599	0.1506	0.0381756	0.0558455
Chr2	6662000	6662200	0.418554	0.158566	0.361497	0.257034	0.210844	0.221171	0.0461419	0.0848869
Chr2	6663900	6664100	0.525625	0.245778	0.468636	0.322993	0.391946	0.112836	0.00955566	0.0532609
Chr2	6679000	6679400	0.371466	0.139074	0.265481	0.234195	0.245482	0.0485825	0.0502631	0.0148305
Chr2	6729100	6729600	0.386821	0.121226	0.246123	0.178575	0.253951	0.196117	0.0364316	0.0769658
Chr2	6729900	6730300	0.390313	0.151481	0.34531	0.198782	0.261829	0.102798	0.0144759	0.01631
Chr2	6803400	6803800	0.51463	0.311229	0.444956	0.312731	0.518457	0.198754	0.0151944	0.0260241
Chr2	6804100	6804300	0.530557	0.21585	0.514366	0.313746	0.406765	0.329762	0.00537635	0.00980394
Chr2	6923500	6924400	0.495797	0.195731	0.39675	0.297244	0.374106	0.201706	0.0360511	0.0541092
Chr2	6924800	6925100	0.410574	0.173868	0.377079	0.186889	0.356271	0.0809347	0.0148148	0.0126389
Chr2	7111900	7112200	0.433456	0.216621	0.472438	0.300367	0.4542	0.118859	0.031705	0.0377681
Chr2	7112600	7112900	0.437804	0.158175	0.350061	0.105568	0.305932	0.114055	0.00860677	0.0509676
Chr2	7154300	7154600	0.50022	0.217448	0.243066	0.405517	0.410446	0.082106	0.0639128	0.0213423
Chr2	7169200	7169500	0.434691	0.165224	0.321857	0.181867	0.27353	0.0768047	0.0160481	0.0251049
Chr2	7289800	7290000	0.368093	0.137109	0.296772	0.217862	0.307973	0.217044	0.0536643	0.0490851
Chr2	7536800	7537100	0.534007	0.272797	0.522719	0.432722	0.481192	0.381654	0.100787	0.0822439
Chr2	7540000	7540200	0.305162	0.0837513	0.261393	0.243358	0.217819	0.0812747	0.0352316	0.012466
Chr2	7813500	7814000	0.413064	0.152624	0.386808	0.240177	0.34489	0.163075	0.0183261	0.0347759
Chr2	7961200	7961400	0.459401	0.137065	0.240367	0.412611	0.299342	0.0689584	0.0107843	0.0191326
Chr2	8077900	8078200	0.495436	0.22704	0.509638	0.3312	0.533654	0.458007	0.0690641	0.0619977
Chr2	8102800	8103000	0.391304	0.112309	0.202884	0.203641	0.333047	0.370878	0.0586155	0.0843171
Chr2	8302400	8303000	0.434639	0.224249	0.33003	0.248074	0.356507	0.206941	0.0200967	0.0524035
Chr2	8822700	8822900	0.404619	0.127468	0.278529	0.232163	0.352493	0.0341043	0.0393207	0.0987771
Chr2	8907400	8908000	0.46256	0.269796	0.508558	0.31044	0.465774	0.350485	0.056131	0.149216
Chr2	9029800	9030100	0.361275	0.171475	0.249944	0.278462	0.211185	0.10487	0.0162088	0.0419895
Chr2	9225600	9225900	0.574696	0.312662	0.584172	0.407898	0.485979	0.171285	0.0567383	0.179158
Chr2	9228900	9229100	0.604152	0.273327	0.553448	0.415921	0.635307	0.226976	0.0229885	0.0280588
Chr2	9595300	9595600	0.68538	0.413013	0.587434	0.606232	0.560529	0.225819	0.0522532	0.0419158
Chr2	9860000	9860400	0.539435	0.256081	0.496726	0.354228	0.473089	0.276922	0.0296401	0.0696033
Chr2	10019000	10019200	0.355176	0.142619	0.238961	0.231877	0.189006	0.158833	0.0385101	0.0169261
Chr2	10070700	10070900	0.308017	0.0607692	0.211951	0.128935	0.329594	0.137615	0.0037037	0.00223214
Chr2	10351600	10351800	0.434787	0.162422	0.438613	0.222986	0.395452	0.310452	0.138195	0.0686722
Chr2	10468300	10468500	0.654149	0.311554	0.660701	0.448937	0.309373	0.169224	0.138839	0.155246
Chr2	11308600	11308800	0.436611	0.205491	0.46234	0.453099	0.407544	0.344433	0.0842552	0.0629047
Chr2	11398700	11399000	0.508164	0.225069	0.440602	0.313688	0.417835	0.144201	0.00345912	0.0441224
Chr2	12092500	12092900	0.386455	0.15099	0.395978	0.213553	0.335948	0.154733	0.0119048	0.0293218
Chr2	12555700	12556200	0.441617	0.211763	0.367652	0.277091	0.412529	0.0674117	0.00676168	0.0258327
Chr2	12801200	12801400	0.396514	0.133293	0.327224	0.307506	0.238043	0.0184907	0	0.011199
Chr2	12802800	12803100	0.57827	0.346092	0.413423	0.246361	0.543855	0.170097	0.035233	0.0447322
Chr2	13101900	13102100	0.537934	0.245207	0.315005	0.444936	0.435595	0.322703	0.0358761	0.0317873
Chr2	13113300	13113500	0.409505	0.108052	0.351668	0.292711	0.276431	0.160557	0.0169823	0.0467172
Chr2	13268500	13268800	0.530488	0.312426	0.468689	0.268331	0.462059	0.0527489	0.0594697	0.0283989
Chr2	13335900	13336400	0.452843	0.236176	0.459525	0.329407	0.393697	0.18654	0.0121608	0.0558756
Chr2	13336800	13337000	0.563934	0.309099	0.550828	0.47092	0.576448	0.145844	0	0.0562772
Chr2	13337800	13338000	0.405871	0.0893251	0.333802	0.277767	0.277792	0.112086	0	0.00862663
Chr2	13634600	13634800	0.549965	0.288865	0.436511	0.364425	0.412995	0.228132	0.0538932	0.0537146
Chr2	13661300	13661500	0.442279	0.16227	0.369285	0.334126	0.345385	0.547124	0.00151515	0.16424
Chr2	13886000	13886300	0.545081	0.312973	0.431858	0.552929	0.529973	0.169296	0.0402959	0.0843929
Chr2	13906700	13906900	0.517846	0.295214	0.554235	0.406549	0.523876	0.365256	0.0380005	0.0622766
Chr2	13907500	13908400	0.62401	0.471976	0.505662	0.345092	0.458173	0.279169	0.0464221	0.0928549
Chr2	14334100	14335000	0.527946	0.333559	0.497195	0.384368	0.381962	0.204886	0.0385089	0.059911
Chr2	14571900	14572600	0.387799	0.199591	0.305546	0.258954	0.353132	0.173229	0.00714166	0.0240652
Chr2	16380400	16380700	0.351084	0.20855	0.38346	0.134809	0.205485	0.119381	0.0680696	0.0412121
Chr2	16876100	16876600	0.43287	0.162077	0.423152	0.377021	0.43086	0.428451	0.140392	0.0337025
Chr2	17147100	17147600	0.62859	0.398383	0.565801	0.382515	0.548882	0.302502	0.0491263	0.0628232
Chr2	17253400	17254200	0.46334	0.298842	0.46504	0.308422	0.346037	0.169769	0.0297719	0.0539129
Chr2	17904600	17905000	0.399224	0.324816	0.4801	0.131746	0.357885	0.192717	0.030112	0.0417234
Chr2	17992600	17992900	0.487187	0.233388	0.437217	0.393821	0.535343	0.37939	0.0246425	0.0758476
Chr2	19172300	19172700	0.505433	0.290915	0.436831	0.469292	0.521506	0.2529	0.0200057	0.124687
Chr2	19196400	19196800	0.561361	0.344285	0.524511	0.384533	0.370105	0.283603	0.0566955	0.0362866
Chr2	19323300	19323600	0.691123	0.323211	0.569988	0.469481	0.523433	0.304795	0.0937454	0.133467
Chr2	19623200	19623600	0.568989	0.329386	0.481898	0.498473	0.552199	0.337042	0.0374261	0.0494543
Chr3	422900	423100	0.609471	0.341722	0.613406	0.398802	0.55537	0.398316	0.0228139	0.0225238
Chr3	1283400	1283600	0.552351	0.28868	0.433326	0.320834	0.499024	0.262774	0.016533	0.0368791
Chr3	1571700	1571900	0.554355	0.326441	0.480936	0.427716	0.507526	0.356724	0.0534075	0.0426243
Chr3	2260600	2260800	0.325491	0.0624708	0.109407	0.221861	0.106159	0.259091	0.163592	0.0744227
Chr3	2628600	2628800	0.48302	0.24403	0.399062	0.315722	0.449424	0.186274	0.0496537	0.119224
Chr3	2629500	2629700	0.501006	0.223065	0.270084	0.244987	0.366557	0.170855	0.0266053	0.038485
Chr3	3080300	3080600	0.52348	0.256225	0.471917	0.421858	0.489432	0.424707	0.0381712	0.0318003
Chr3	3716500	3717000	0.442774	0.220452	0.347185	0.316205	0.383562	0.189199	0.00357143	0.0220621
Chr3	3874200	3874500	0.379613	0.140062	0.337269	0.276894	0.370067	0.265054	0.0128725	0.0245088
Chr3	4467700	4468400	0.451368	0.236097	0.37001	0.30944	0.394167	0.170353	0.0267119	0.0355832
Chr3	4579300	4579500	0.580884	0.354804	0.567578	0.412343	0.5903	0.285562	0.0618595	0.131936
Chr3	4584900	4585200	0.602921	0.388062	0.600911	0.434903	0.450085	0.304659	0.0481477	0.052212
Chr3	4929800	4930000	0.515278	0.0717948	0	0.365333	0	0.343924	0.277778	0.364102
Chr3	4977300	4977500	0.300439	0.0872298	0.295258	0.316735	0.274226	0.279327	0.044823	0.0332811
Chr3	5622200	5622900	0.45542	0.268111	0.418034	0.373365	0.410525	0.190314	0.0171152	0.0489881
Chr3	5743900	5745500	0.5732	0.368765	0.480329	0.43231	0.456209	0.248081	0.0315912	0.0676552
Chr3	5792500	5792700	0.550648	0.314484	0.565734	0.447834	0.533089	0.356774	0.133625	0.0696453
Chr3	6992200	6992400	0.25777	0.0532467	0.133416	0.111163	0.114019	0.0714165	0.00369048	0.0338858
Chr3	7766200	7766400	0.439017	0.0763291	0.369381	0.377099	0.440869	0.0751212	0.0211992	0.0184393
Chr3	7851700	7851900	0.625643	0.209793	0.462153	0.332328	0.256173	0.255555	0.032	0.126984
Chr3	7922000	7922300	0.388563	0.233535	0.437349	0.325896	0.375847	0.121818	0.0839386	0.138448
Chr3	7937200	7937400	0.495426	0.218603	0.346035	0.296442	0.528086	0.258565	0.0158338	0.0816674
Chr3	7994900	7995300	0.435126	0.258357	0.442609	0.251277	0.492713	0.207108	0.0187289	0.0183744
Chr3	7995700	7996400	0.494102	0.3031	0.405708	0.406238	0.368093	0.13832	0.00744566	0.0268205
Chr3	8093500	8093900	0.373467	0.205759	0.308554	0.197302	0.292761	0.15456	0.0204795	0.0528629
Chr3	8426100	8426300	0.343752	0.133212	0.183376	0.217327	0.310144	0.371788	0.0744011	0.10365
Chr3	8492000	8492500	0.420316	0.213019	0.467839	0.328393	0.468772	0.181323	0.00515873	0.0266167
Chr3	8875300	8875600	0.389367	0.184716	0.36751	0.168259	0.34655	0.258695	0.0260646	0.080363
Chr3	8883600	8883800	0.364923	0.157766	0.282781	0.268207	0.416747	0.390328	0.0333165	0.0781648
Chr3	9383800	9384300	0.394079	0.140977	0.355654	0.26759	0.468331	0.233638	0.0177321	0.0807768
Chr3	9384800	9385400	0.493704	0.354049	0.481951	0.382591	0.431036	0.214428	0.0294782	0.117168
Chr3	9665300	9665500	0.443124	0.221894	0.552983	0.296966	0.399575	0.279303	0.00681818	0.0571931
Chr3	9766400	9766700	0.532956	0.24258	0.481603	0.426672	0.412226	0.132372	0.0134666	0.0503706
Chr3	9767000	9767500	0.525269	0.318364	0.471361	0.353639	0.435235	0.134451	0.0181655	0.0450265
Chr3	10294200	10294600	0.350078	0.102617	0.254106	0.201858	0.318653	0.264294	0.0315765	0.0664704
Chr3	10314000	10314200	0.415501	0.163957	0.28704	0.204764	0.278237	0.344293	0.00450451	0.00917066
Chr3	10556200	10557100	0.451809	0.243778	0.343101	0.281531	0.366473	0.156084	0.0167953	0.0290021
Chr3	10575100	10575400	0.562805	0.244156	0.493607	0.298226	0.480633	0.0916285	0.00610195	0.0472032
Chr3	10758300	10758500	0.545481	0.323939	0.70252	0.489037	0.520873	0.168855	0.0397422	0.0267915
Chr3	10819400	10819900	0.45549	0.154396	0.322154	0.328905	0.319585	0.0938461	0.00784313	0.0750915
Chr3	10820300	10821200	0.49911	0.288131	0.458706	0.296285	0.423694	0.11782	0.0238824	0.0479147
Chr3	11090600	11090800	0.395262	0.159759	0.267141	0.306024	0.354624	0.124025	0.00622294	0.038115
Chr3	11132300	11132600	0.579907	0.33628	0.516875	0.392516	0.4594	0.177516	0.0112928	0.0754853
Chr3	11166800	11167300	0.358194	0.181856	0.359032	0.207197	0.333507	0.17273	0.00598542	0.011455
Chr3	11200800	11201100	0.466303	0.250609	0.337486	0.21484	0.379638	0.0911767	0.0017094	0.0160867
Chr3	11205400	11205600	0.470396	0.216352	0.371376	0.217094	0.252597	0.218023	0.0575952	0.0437769
Chr3	11286700	11286900	0.532099	0.283738	0.405995	0.382589	0.393181	0.297008	0.0150253	0.0330223
Chr3	11348100	11348300	0.41753	0.0693264	0.171277	0.199982	0.284207	0.120956	0.0126482	0.0218646
Chr3	11374300	11374500	0.430417	0.160648	0.300495	0.157507	0.214173	0.0853805	0.0549401	0.0613722
Chr3	11380400	11380700	0.555043	0.325024	0.447254	0.42291	0.341393	0.0393674	0.0123647	0.0189436
Chr3	11426100	11426400	0.322304	0.12423	0.28389	0.176708	0.131128	0.0227273	0.0170139	0.0460662
Chr3	11502700	11503500	0.339578	0.145631	0.277578	0.148482	0.241784	0.140775	0.01894	0.0394143
Chr3	11536100	11536300	0.378995	0.132174	0.356442	0.371193	0.347867	0.0674863	0.028162	0.017043
Chr3	11968000	11968500	0.458264	0.238397	0.423499	0.444851	0.428181	0.189339	0.0334664	0.0298182
Chr3	12092400	12092700	0.56784	0.228394	0.519589	0.398581	0.499311	0.155755	0	0.0334608
Chr3	12136100	12136400	0.506782	0.257813	0.34063	0.345629	0.415828	0.0427619	0.0553278	0.0355561
Chr3	12276300	12276500	0.421514	0.184709	0.188875	0.0810551	0.118422	0.0732396	0.0124405	0.075932
Chr3	12359200	12359400	0.315777	0.0765717	0.391156	0.114305	0.250745	0.116744	0.0195112	0.101016
Chr3	12485200	12485400	0.47388	0.217589	0.308954	0.21978	0.529819	0.195623	0.0583894	0.0678082
Chr3	12854400	12854700	0.429108	0.296021	0.245561	0.338153	0.324929	0.094221	0.0289682	0.150156
Chr3	13128700	13128900	0.611531	0.371954	0.44319	0.511767	0.578981	0.00255102	0.0185185	0.0112434
Chr3	13328300	13328500	0.542603	0.138968	0.143903	0.267937	0.300541	0.0567592	0.0303175	0.0138889
Chr3	14057300	14057700	0.406168	0.212248	0.348011	0.29186	0.240802	0.0781934	0.0127587	0.0523046
Chr3	14562400	14562600	0.371168	0.0892736	0.226313	0.257911	0.22886	0.119679	0.0150271	0.0225926
Chr3	14957000	14957200	0.537706	0.291155	0.437853	0.25388	0.610376	0.217754	0.0439927	0.0698703
Chr3	15005500	15005800	0.449431	0.282322	0.439004	0.307887	0.360144	0.20212	0.122438	0.145231
Chr3	15078400	15078800	0.512702	0.362336	0.444768	0.366665	0.439793	0.423804	0.19898	0.33766
Chr3	15168800	15169000	0.466619	0.23103	0.343055	0.20349	0.371694	0.133575	0.0366172	0.00800274
Chr3	15451600	15452800	0.399108	0.182753	0.319083	0.216179	0.267198	0.0783365	0.0169152	0.0205449
Chr3	15485200	15485700	0.460122	0.229223	0.400392	0.391937	0.352643	0.0861662	0.0254173	0.0333069
Chr3	15783200	15783500	0.484638	0.273217	0.401754	0.326123	0.387234	0.118233	0.0116935	0.0296351
Chr3	15937500	15937900	0.435717	0.152418	0.353719	0.234684	0.260952	0.0336135	0.0116144	0.0100984
Chr3	16040000	16040400	0.315138	0.201517	0.282655	0.240987	0.327801	0.126739	0.0442753	0.0714779
Chr3	16065600	16065900	0.525691	0.16651	0.400943	0.29238	0.326164	0.0570547	0.0270238	0.0956964
Chr3	16182300	16182500	0.624407	0.388557	0.52876	0.241394	0.430021	0.324801	0.168472	0.12123
Chr3	16235500	16235700	0.6724	0.347707	0.610236	0.480787	0.630516	0.319876	0.0536255	0.0435426
Chr3	16266700	16267200	0.47527	0.266936	0.382761	0.289409	0.401295	0.126897	0.0163004	0.0261067
Chr3	16276000	16276200	0.473229	0.140113	0.309396	0.309793	0.310564	0.226908	0.0125661	0.0590374
Chr3	16281700	16281900	0.311019	0.0988617	0.26851	0.219511	0.284396	0.185275	0.0114286	0.032591
Chr3	16405300	16405700	0.603467	0.325728	0.511673	0.295676	0.34638	0.213877	0.0352028	0.0460789
Chr3	16420100	16420300	0.448142	0.192409	0.481458	0.25703	0.487627	0.066766	0.0433862	0.0181626
Chr3	16451200	16451400	0.405478	0.201574	0.596456	0.297685	0.374938	0.197141	0.0496795	0.0521205
Chr3	16451700	16451900	0.594288	0.369128	0.474117	0.341311	0.543266	0.137033	0.198073	0.0637422
Chr3	16485500	16485800	0.529085	0.283717	0.461544	0.389828	0.516894	0.138943	0.016587	0.0441233
Chr3	16511200	16511500	0.296967	0.11883	0.265851	0.155368	0.336376	0.108088	0.0362077	0.0771289
Chr3	16562000	16562500	0.56776	0.373611	0.559745	0.448285	0.555571	0.214663	0.0198998	0.060407
Chr3	16700000	16700300	0.544595	0.331513	0.536922	0.329747	0.428897	0.287111	0.141838	0.164293
Chr3	16723200	16723400	0.598671	0.345325	0.518184	0.345097	0.510593	0.13566	0.169142	0.0471476
Chr3	16879700	16880100	0.270079	0.0577884	0.286721	0.0792155	0.221792	0.0490675	0.0119494	0.0181005
Chr3	16938000	16938200	0.278175	0.0710839	0.164152	0.114711	0.223389	0.113282	0.0206388	0.0161291
Chr3	17061500	17062000	0.34136	0.105042	0.389374	0.228307	0.339079	0.0834975	0.00940352	0.0157986
Chr3	17062600	17063200	0.351917	0.174227	0.337002	0.226016	0.26757	0.0953113	0.00608828	0.0331246
Chr3	17142500	17142700	0.520266	0.212475	0.481319	0.188144	0.327272	0.105138	0	0.0979878
Chr3	17143500	17144000	0.603425	0.40962	0.551006	0.489342	0.544252	0.164692	0.00848597	0.104837
Chr3	17150300	17150700	0.415055	0.212039	0.383331	0.2544	0.34628	0.333697	0.0246848	0.0690395
Chr3	17275800	17276300	0.46429	0.267296	0.367682	0.283348	0.382473	0.137025	0.0240777	0.0610136
Chr3	17277100	17277800	0.487914	0.252971	0.45295	0.267144	0.425094	0.120121	0.0137481	0.0391213
Chr3	17300500	17301000	0.614151	0.414775	0.4843	0.336269	0.427224	0.160998	0.0517328	0.0311886
Chr3	17367200	17367700	0.657122	0.280285	0.610479	0.295303	0.477061	0.108015	0.0306418	0.0480789
Chr3	17469700	17470000	0.408321	0.200708	0.28591	0.282201	0.293687	0.190175	0.014274	0.0371835
Chr3	17730800	17731200	0.502296	0.282727	0.442131	0.502544	0.496734	0.268218	0.0437955	0.125019
Chr3	17777500	17778000	0.496663	0.250578	0.433647	0.391404	0.464878	0.219058	0.0128709	0.0373862
Chr3	18412200	18412400	0.51219	0.276063	0.549279	0.395478	0.627705	0.14039	0.0104167	0.0352502
Chr3	18412900	18413200	0.528688	0.26024	0.385078	0.387854	0.519357	0.322635	0.0351356	0.0768727
Chr3	18495300	18495500	0.488465	0.275819	0.386387	0.439265	0.381903	0.152064	0.014881	0.0774169
Chr3	18734800	18735400	0.485553	0.225448	0.417974	0.265234	0.436627	0.117975	0.0060606	0.0458076
Chr3	18746900	18747100	0.667465	0.431876	0.533549	0.55898	0.575557	0.320349	0.0443656	0.104444
Chr3	19178400	19178600	0.377319	0.155323	0.312041	0.289022	0.299045	0.14204	0.0152783	0.0404173
Chr3	19529600	19529800	0.576676	0.315859	0.427176	0.425093	0.479368	0.458007	0.0784562	0.0907432
Chr3	20486800	20487000	0.348258	0.127115	0.261344	0.197802	0.304884	0.13725	0.0169834	0.024491
Chr3	20655000	20655300	0.424445	0.137816	0.462116	0.287408	0.338975	0.0812711	0.0060606	0.0239332
Chr3	20769700	20770200	0.473885	0.279542	0.483587	0.395317	0.371613	0.289033	0.0337017	0.131626
Chr3	20788100	20788400	0.560724	0.27422	0.510405	0.30547	0.50074	0.310957	0.0586275	0.0942852
Chr3	22119500	22119900	0.557248	0.35644	0.588351	0.462408	0.443235	0.251506	0.038564	0.0609223
Chr3	22215500	22215900	0.437933	0.188752	0.374152	0.303728	0.378374	0.322566	0.0380206	0.0408822
Chr4	78900	79200	0.640953	0.391902	0.464305	0.454529	0.500162	0.472904	0.179414	0.147984
Chr4	417600	417800	0.300794	0.0498713	0.238529	0.21932	0.244626	0.294383	0.0161905	0.0721249
Chr4	929500	929800	0.341474	0.166901	0.312765	0.25612	0.320335	0.386868	0.0804289	0.0844382
Chr4	1000000	1000500	0.41832	0.213384	0.466364	0.362725	0.342212	0.211976	0.0226399	0.0577444
Chr4	1199400	1199600	0.334322	0.0672872	0.260844	0.263569	0.213429	0.112503	0	0.0231699
Chr4	1281600	1282400	0.398305	0.157643	0.308255	0.2665	0.290323	0.140126	0.0187868	0.0335468
Chr4	1521400	1521600	0.58097	0.282079	0.679815	0.427436	0.62683	0.100622	0.0148753	0.0238084
Chr4	1749400	1749600	0.487893	0.251671	0.430422	0.238798	0.318779	0.184728	0.0382431	0.0527074
Chr4	2423400	2423700	0.414021	0.226393	0.275565	0.266061	0.315542	0.0252456	0	0.00938105
Chr4	2621300	2621600	0.374139	0.176451	0.376698	0.263543	0.344895	0.137568	0.0191964	0.0184803
Chr4	2867800	2868000	0.380212	0.135896	0.172199	0.147028	0.384951	0.182614	0.0243074	0.076176
Chr4	3559800	3560000	0.395819	0.127757	0.310434	0.253045	0.293263	0.0477114	0.0592465	0.0757727
Chr4	3893700	3894000	0.486819	0.237561	0.364391	0.374869	0.398953	0.0158863	0.0116029	0.0355997
Chr4	3897100	3897500	0.402138	0.140622	0.343177	0.277642	0.370899	0.170039	0.0044271	0.0335241
Chr4	4096000	4096200	0.385974	0.107126	0.282519	0.142924	0.203034	0.165732	0.0292529	0.0972858
Chr4	4146400	4147000	0.369941	0.13831	0.226337	0.190261	0.269055	0.0449264	0.00586623	0.0256164
Chr4	4147900	4148100	0.349585	0.0316431	0.38799	0.209702	0.200639	0.0681373	0.0126482	0.00162338
Chr4	5177400	5177800	0.285061	0.0961663	0.195082	0.10785	0.213472	0.0918414	0.0183641	0.0321782
Chr4	5301000	5301200	0.503209	0.27992	0.455197	0.286598	0.416347	0.241211	0.048056	0.0894372
Chr4	5382600	5382900	0.614038	0.311118	0.583692	0.467819	0.500135	0.0304568	0.00441919	0.0849259
Chr4	5393900	5394100	0.624768	0.40649	0.468982	0.305585	0.518311	0.0764369	0.0100901	0.0360741
Chr4	5397700	5397900	0.376678	0.141014	0.204273	0.178947	0.291071	0.196342	0.0617007	0.105405
Chr4	5430800	5431000	0.478106	0.120256	0.384919	0.25391	0.395426	0.0995249	0.016231	0.0478367
Chr4	5442000	5442200	0.236921	0.0351866	0.106571	0.152085	0.0859347	0.168904	0	0.0734127
Chr4	5539400	5540000	0.349942	0.142142	0.397064	0.249491	0.323699	0.0553094	0.00801499	0.0213753
Chr4	5612600	5612800	0.488037	0.229923	0.437178	0.336166	0.401281	0.208109	0.0770065	0.14807
Chr4	5901500	5901900	0.373021	0.228631	0.305028	0.141026	0.321012	0.0224868	0.0690909	0.0106667
Chr4	6115300	6115600	0.466654	0.165017	0.411187	0.357567	0.377824	0.0654193	0.026454	0.0542404
Chr4	6140700	6140900	0.538353	0.316823	0.441443	0.350512	0.495131	0.29262	0.0708707	0.0324166
Chr4	6158300	6159000	0.298858	0.0974221	0.210061	0.11791	0.215902	0.0674733	0.00470975	0.0180607
Chr4	6166000	6166400	0.571937	0.226959	0.428912	0.329714	0.477439	0.114206	0.0259043	0.055518
Chr4	6216500	6216700	0.44521	0.173499	0.352766	0.200515	0.473547	0.412786	0.00555557	0.0638099
Chr4	6274000	6274300	0.409261	0.199286	0.38881	0.428887	0.3274	0.304868	0.00287268	0.0549353
Chr4	6274600	6275100	0.261602	0.0897881	0.234467	0.15932	0.261392	0.177885	0.0739228	0.052018
Chr4	6428900	6429600	0.595461	0.195374	0.231557	0.360627	0.269451	0.0846702	0.0705128	0.075036
Chr4	6661100	6661400	0.43885	0.209114	0.440492	0.294259	0.288961	0.17418	0.0213825	0.0344771
Chr4	6895200	6895500	0.479515	0.25221	0.426492	0.368637	0.454759	0.276126	0.023279	0.0438855
Chr4	7040900	7041100	0.573891	0.263938	0.550074	0.203418	0.388655	0.501257	0.0956382	0.230717
Chr4	7155000	7155400	0.39733	0.18494	0.33284	0.262924	0.37185	0.236739	0.0295567	0.068147
Chr4	7230700	7231100	0.330755	0.103459	0.297109	0.136747	0.24057	0.265912	0.053724	0.0116458
Chr4	7313200	7313400	0.458164	0.198937	0.417961	0.279858	0.342189	0.192096	0.0243855	0.0425233
Chr4	7360100	7360400	0.506552	0.323156	0.593864	0.415612	0.433275	0.159445	0.0125	0.10108
Chr4	7360800	7361200	0.302264	0.114847	0.240472	0.194737	0.264786	0.111769	0.0412509	0.0464084
Chr4	7383600	7384300	0.367127	0.211818	0.323625	0.335888	0.300738	0.195087	0.0257888	0.0448618
Chr4	7630300	7630500	0.471043	0.154315	0.558525	0.455941	0.501133	0.148605	0.0502789	0.0453928
Chr4	7817200	7817500	0.522876	0.318729	0.529299	0.213839	0.500889	0.159959	0.00617283	0
Chr4	7817900	7818400	0.341349	0.118845	0.325602	0.196659	0.272938	0.11679	0.0109533	0.0340667
Chr4	7838400	7838800	0.310993	0.170527	0.322258	0.238502	0.214345	0.220497	0.0350281	0.0660397
Chr4	8064300	8065000	0.57573	0.28962	0.484048	0.376581	0.455046	0.202792	0.0264473	0.0680768
Chr4	8421300	8421900	0.432063	0.24566	0.483212	0.32802	0.45871	0.416272	0.0592175	0.134174
Chr4	8728400	8728700	0.530442	0.244112	0.52401	0.347429	0.412034	0.3273	0.0358186	0.0266992
Chr4	8729100	8729300	0.59659	0.319795	0.510303	0.556334	0.515962	0.186698	0.0825203	0.0506739
Chr4	8729900	8730200	0.627979	0.229186	0.417089	0.233008	0.532569	0.105312	0.0207373	0.0683081
Chr4	8802300	8802700	0.461081	0.224881	0.478309	0.331642	0.394417	0.180758	0.0211363	0.0464923
Chr4	8836700	8836900	0.477649	0.219511	0.415565	0.413513	0.502217	0.371781	0.0594655	0.0747804
Chr4	9145300	9145600	0.410389	0.243926	0.286983	0.195933	0.324861	0.0364517	0.0198754	0.0255177
Chr4	9146900	9147100	0.472117	0.223454	0.336956	0.317509	0.390576	0.210435	0.0441756	0.087504
Chr4	9188800	9189100	0.37462	0.167885	0.411119	0.353683	0.454128	0.230654	0.0120038	0.0156404
Chr4	9438800	9439500	0.469908	0.247628	0.485328	0.355029	0.415872	0.109038	0.0210277	0.0521638
Chr4	9574200	9574400	0.520001	0.222401	0.542457	0.278229	0.38047	0.244329	0.0704841	0.10154
Chr4	9762100	9762400	0.404732	0.0974169	0.273299	0.202251	0.314679	0.104507	0.0251915	0.0366857
Chr4	9841800	9842400	0.53824	0.308437	0.4925	0.374885	0.498687	0.180365	0.0138305	0.0501399
Chr4	9903900	9904100	0.407792	0.184219	0.337696	0.292357	0.336505	0.587447	0.170177	0.0680384
Chr4	9912400	9913600	0.448464	0.224532	0.429905	0.309252	0.349529	0.216513	0.0398885	0.0681114
Chr4	9956100	9956400	0.291154	0.119664	0.139376	0.206017	0.160628	0.512201	0.258518	0.200999
Chr4	10395500	10395900	0.351407	0.146713	0.354384	0.261585	0.401379	0.136648	0.00234192	0.042692
Chr4	10396700	10397100	0.514667	0.239204	0.400354	0.312909	0.402646	0.139782	0.00505051	0.0311265
Chr4	10871000	10871600	0.260482	0.101533	0.324351	0.232077	0.254535	0.143524	0.0311542	0.0495033
Chr4	10899600	10900100	0.595418	0.354893	0.626011	0.491034	0.470029	0.352328	0.0864752	0.0562748
Chr4	11192800	11193200	0.627184	0.379868	0.538037	0.492291	0.446499	0.370105	0.0385085	0.0350529
Chr4	11361200	11361600	0.537195	0.247011	0.466705	0.394898	0.414159	0.262331	0.0338212	0.107832
Chr4	11362300	11362500	0.433855	0.169612	0.448713	0.302505	0.451438	0.0815646	0.0136508	0.0615702
Chr4	12365200	12365400	0.58798	0.363011	0.556191	0.404081	0.504563	0.39469	0.0466234	0.0428046
Chr4	12698800	12699000	0.332399	0.0350877	0.304812	0.210398	0.249922	0.100926	0.00869565	0.0373016
Chr4	12863200	12863500	0.409984	0.201922	0.308831	0.304796	0.235943	0.00825702	0.0119826	0.03122
Chr4	12968000	12968300	0.43728	0.201626	0.30235	0.27512	0.380251	0.212383	0.00517099	0.0776995
Chr4	13537600	13537800	0.602184	0.369739	0.581605	0.369044	0.564158	0.349347	0.0530111	0.0442015
Chr4	14390300	14390600	0.492668	0.198498	0.536572	0.296346	0.562978	0.371714	0.00178572	0.0846446
Chr4	14458000	14458200	0.544629	0.290555	0.610834	0.412426	0.519699	0.196075	0.059264	0.103779
Chr4	15012600	15012800	0.597086	0.341419	0.619568	0.462511	0.395677	0.490149	0.0573593	0.0817734
Chr4	16055100	16055600	0.491453	0.2734	0.473064	0.386504	0.555055	0.342969	0.120078	0.19092
Chr4	16705500	16705800	0.390027	0.160513	0.411469	0.270854	0.440369	0.30175	0.0221885	0.0826987
Chr4	16864400	16865100	0.479377	0.238915	0.61514	0.390405	0.454904	0.265738	0.0104575	0.129293
Chr4	17501900	17502200	0.527559	0.294433	0.526205	0.438085	0.585517	0.361213	0.0496868	0.181393
Chr4	17655800	17656000	0.454259	0.246953	0.520643	0.353849	0.375598	0.365098	0.0203677	0.0719573
Chr4	18232400	18232600	0.361117	0.119307	0.287085	0.28256	0.235171	0.433323	0.0349677	0.0233603
Chr5	70100	70400	0.421143	0.177324	0.290039	0.14691	0.219695	0.244969	0.171944	0.20479
Chr5	838800	839100	0.297411	0.0941713	0.316115	0.264488	0.187426	0.037927	0.0233247	0.0414035
Chr5	2187300	2187600	0.414108	0.269497	0.293128	0.256493	0.276157	0.143503	0.0224092	0.109675
Chr5	3018700	3018900	0.562168	0.308561	0.472571	0.41242	0.500741	0.360534	0.0474136	0.0982891
Chr5	3115700	3116300	0.37523	0.179436	0.412883	0.264456	0.334694	0.169417	0.0380979	0.0765893
Chr5	3688500	3688800	0.55104	0.342411	0.332383	0.296129	0.329899	0.286457	0.0114468	0.0062919
Chr5	3903600	3903800	0.402165	0.171133	0.342079	0.225465	0.325584	0.239568	0.0539748	0.0565548
Chr5	4312800	4313000	0.449831	0.205299	0.415505	0.179263	0.388504	0.0888988	0.009768	0.0258005
Chr5	4314400	4314800	0.527023	0.261767	0.519346	0.278213	0.470544	0.125131	0.031427	0.00198413
Chr5	4780300	4780500	0.505335	0.26892	0.533928	0.516793	0.565482	0.384043	0.0192365	0.101154
Chr5	4781900	4782200	0.345276	0.139955	0.352073	0.180194	0.360242	0.0540126	0.005291	0.0381563
Chr5	5428000	5428300	0.501853	0.283139	0.424076	0.373429	0.438897	0.272402	0.0350595	0.126987
Chr5	5976900	5977100	0.592252	0.278905	0.438893	0.312615	0.432649	0.250843	0.110459	0.128205
Chr5	6420000	6420300	0.681154	0.298337	0.600494	0.489247	0.602671	0.328081	0.0641711	0.052402
Chr5	6634900	6635100	0.490336	0.0767676	0.0870968	0	0.35468	0.201786	0.15	0.0701754
Chr5	7153200	7154400	0.458171	0.293901	0.449185	0.332439	0.454887	0.153183	0.00979897	0.0482372
Chr5	7417300	7417600	0.585346	0.265247	0.54501	0.313768	0.493673	0.305143	0.0459885	0.119344
Chr5	7712300	7712500	0.41342	0.205481	0.330881	0.213887	0.312241	0.231614	0.0618875	0.0311355
Chr5	8683400	8683900	0.554747	0.281915	0.510456	0.464615	0.507702	0.246021	0.0319431	0.0399482
Chr5	8745600	8746200	0.628204	0.442854	0.472098	0.487689	0.502537	0.31245	0.0209254	0.0998686
Chr5	8766700	8766900	0.579713	0.309532	0.352034	0.420905	0.460934	0.134974	0.0201739	0.0927263
Chr5	9134100	9134500	0.453658	0.243831	0.48371	0.341163	0.383698	0.20466	0.0194094	0.0356536
Chr5	9291000	9291200	0.387439	0.118407	0.23788	0.310443	0.107848	0.0706739	0.0469336	0.00274725
Chr5	9372200	9372500	0.281318	0.107305	0.206599	0.101573	0.252669	0.0988924	0.00693953	0.028382
Chr5	9557700	9558000	0.594419	0.323222	0.463263	0.361472	0.529465	0.359014	0.0476919	0.0648978
Chr5	9558300	9558700	0.649251	0.396305	0.447184	0.426178	0.530071	0.165269	0.0228366	0.0474899
Chr5	9590700	9591400	0.514137	0.337581	0.395138	0.31262	0.445525	0.150061	0.0203402	0.0347773
Chr5	9611100	9611300	0.36033	0.114746	0.0988131	0.208257	0.119418	0.00620915	0.0242011	0.00726018
Chr5	9613000	9613200	0.44738	0.218638	0.370678	0.200349	0.367485	0.0991046	0.039479	0.0231092
Chr5	9963000	9963300	0.460191	0.251324	0.436801	0.267938	0.452126	0.185997	0.0748642	0.0512606
Chr5	9964600	9965000	0.433621	0.209892	0.284121	0.214583	0.29494	0.104305	0.00291545	0.0109298
Chr5	9978800	9979000	0.369041	0.0892673	0.40931	0.318653	0.399412	0.28121	0.0809044	0.103049
Chr5	9993700	9994200	0.411268	0.163256	0.315	0.229416	0.28858	0.0492602	0	0.00179724
Chr5	10188000	10188200	0.421449	0.127267	0.385712	0.24988	0.339863	0.150177	0.0166667	0.00733618
Chr5	10269200	10269700	0.404087	0.14579	0.280008	0.212141	0.308631	0.110026	0.0160825	0.0089996
Chr5	10402200	10402500	0.33035	0.0889245	0.223895	0.189942	0.160027	0.0783591	0.0828036	0.073809
Chr5	10404900	10405300	0.437505	0.203993	0.571601	0.306226	0.356838	0.119437	0	0.0734718
Chr5	10532300	10532600	0.313181	0.115479	0.110974	0.142797	0.109886	0.0231043	0.0115816	0.012029
Chr5	10714500	10715000	0.490094	0.246357	0.471503	0.362083	0.501841	0.0672501	0.0185367	0.0338262
Chr5	10844400	10844600	0.327685	0.130236	0.187283	0.0522731	0.214239	0.134156	0.0823282	0.0341452
Chr5	11025400	11025600	0.38224	0.116564	0.421204	0.251321	0.346744	0.188935	0.00769231	0.00560897
Chr5	11025900	11026300	0.563616	0.391413	0.310102	0.347237	0.508479	0.20213	0.0290582	0.0887331
Chr5	11027300	11027800	0.308848	0.0869881	0.24152	0.128845	0.293602	0.109773	0.013669	0.0313985
Chr5	11379000	11379300	0.639233	0.309408	0.613737	0.424226	0.493462	0.0206753	0.00423941	0.0264506
Chr5	11383800	11384300	0.389659	0.192216	0.264167	0.242952	0.27028	0.118481	0.0211932	0.026945
Chr5	12554700	12555000	0.321062	0.120708	0.342373	0.162077	0.238967	0.114218	0.00650407	0.0182636
Chr5	12973900	12974200	0.488172	0.281916	0.54898	0.360961	0.333802	0.332616	0.236627	0.28136
Chr5	13220300	13220700	0.473525	0.356627	0.476538	0.441008	0.550404	0.0175654	0.0508512	0.0334498
Chr5	13372500	13372700	0.482952	0.140983	0.218948	0.260436	0.357287	0.112396	0.0739716	0.0960763
Chr5	13656400	13656700	0.547274	0.378658	0.405623	0.275436	0.485199	0.368697	0.132656	0.0581615
Chr5	13720700	13720900	0.517641	0.205171	0.272294	0.152874	0.383008	0.014652	0.00446429	0.020211
Chr5	13734000	13734300	0.322258	0.165668	0.34174	0.221864	0.254453	0.083516	0.0191667	0.0298635
Chr5	13813800	13814100	0.428427	0.184042	0.356443	0.276477	0.321459	0.117085	0.00866803	0.021088
Chr5	13918200	13918800	0.421543	0.243381	0.299362	0.299209	0.3518	0.063708	0.0167888	0.0588353
Chr5	14080800	14081000	0.440942	0.175165	0.389445	0.18999	0.378335	0.106667	0.00555555	0.0505291
Chr5	14082400	14082700	0.464474	0.172051	0.317341	0.316319	0.431261	0.0378906	0	0.00916099
Chr5	14104000	14104200	0.484932	0.197349	0.241226	0.156254	0.408745	0.260119	0.148632	0.0387826
Chr5	14149400	14149800	0.386727	0.104906	0.295118	0.204112	0.330369	0.0578142	0.0210901	0.0476192
Chr5	14153100	14153400	0.461911	0.175244	0.371144	0.138449	0.339404	0.129993	0.019987	0.0481599
Chr5	14580800	14581000	0.661198	0.383525	0.459821	0.343239	0.477517	0.124326	0.0368243	0.0127544
Chr5	14693800	14694000	0.439479	0.0851021	0.298004	0.291228	0.251747	0.249572	0.0128205	0.0148942
Chr5	14760700	14761100	0.508547	0.315608	0.45474	0.307394	0.429795	0.164675	0.0306437	0.058648
Chr5	14847000	14847200	0.471714	0.232068	0.456909	0.324179	0.354919	0.264959	0.0409475	0.0329189
Chr5	14880100	14880800	0.448786	0.249127	0.451445	0.29288	0.418717	0.227567	0.0475891	0.0571072
Chr5	14956200	14956400	0.615364	0.337143	0.525727	0.430253	0.56116	0.259501	0.00650775	0.068027
Chr5	15042700	15043400	0.524919	0.277842	0.453074	0.362174	0.483195	0.157146	0.0137495	0.0586798
Chr5	15301800	15302200	0.304878	0.127708	0.351449	0.272689	0.172222	0.200427	0.111905	0.124278
Chr5	15302600	15302800	0.386876	0.167546	0.367756	0.378901	0.380236	0.369558	0.0346801	0.157188
Chr5	15535300	15536000	0.370089	0.180145	0.298708	0.208087	0.280705	0.145043	0.032643	0.0258956
Chr5	15576400	15577300	0.431899	0.265213	0.415029	0.323062	0.491395	0.172651	0.0252528	0.0571651
Chr5	15605900	15606600	0.393228	0.236507	0.341416	0.303193	0.431974	0.12146	0.0195678	0.0385868
Chr5	15716700	15716900	0.50345	0.18628	0.290014	0.335051	0.393776	0.294808	0.110213	0.141887
Chr5	15882300	15882500	0.548582	0.276226	0.45874	0.347468	0.437664	0.253334	0	0.0387921
Chr5	15886800	15887000	0.584743	0.302894	0.412204	0.334462	0.470346	0.23318	0.0090703	0.0503318
Chr5	16356700	16356900	0.407836	0.158983	0.378011	0.193352	0.257152	0.337982	0.00694444	0.00266667
Chr5	16357300	16357700	0.605204	0.412188	0.554384	0.373527	0.58508	0.2131	0.0484572	0.0671534
Chr5	16358200	16358500	0.516512	0.254387	0.53286	0.282697	0.323933	0.18444	0.0164786	0.0213998
Chr5	17366000	17366300	0.609639	0.349784	0.465853	0.377156	0.451298	0.171824	0.0309389	0.0777143
Chr5	17366600	17367100	0.462253	0.194687	0.412646	0.30659	0.501776	0.153293	0.0151761	0.0300615
Chr5	17398100	17398700	0.372214	0.113493	0.311004	0.265852	0.280362	0.176431	0.00591349	0.0155683
Chr5	17543300	17543700	0.381278	0.154058	0.329082	0.25186	0.206983	0.0868966	0.01204	0.0137649
Chr5	17578500	17579200	0.413745	0.20667	0.382926	0.344794	0.408848	0.207394	0.0521506	0.0290891
Chr5	17617900	17618300	0.632242	0.392452	0.58402	0.530183	0.386214	0.267825	0.0612338	0.044716
Chr5	17726400	17726600	0.61538	0.366256	0.537306	0.411478	0.383756	0.411589	0.093059	0.134549
Chr5	17775700	17776200	0.505584	0.292153	0.389468	0.354199	0.479764	0.166351	0.0171647	0.0873369
Chr5	17777500	17777700	0.479206	0.14569	0.454531	0.478925	0.476505	0.361301	0.0373249	0.127742
Chr5	17955700	17956000	0.447827	0.263127	0.437843	0.361228	0.4167	0.0978758	0.0196171	0.0369076
Chr5	18479900	18480200	0.459035	0.139783	0.158717	0.150313	0.291804	0.18535	0.0871538	0.210754
Chr5	18554600	18555000	0.350976	0.173618	0.332168	0.230412	0.367083	0.207246	0.026872	0.0483305
Chr5	18853900	18854400	0.427577	0.185871	0.421471	0.342516	0.361344	0.174363	0.0550741	0.0436747
Chr5	18854800	18855000	0.565112	0.271348	0.598751	0.530189	0.375183	0.171396	0.0442982	0.0783634
Chr5	19019100	19019400	0.431609	0.204216	0.394953	0.274784	0.398016	0.239077	0.00914201	0.0762236
Chr5	19101600	19101800	0.634845	0.276545	0.589044	0.336421	0.544183	0.439615	0.075817	0.104319
Chr5	19479700	19479900	0.38732	0.140897	0.297711	0.290186	0.388159	0.337572	0.0372251	0.0508758
Chr5	19741900	19742500	0.358568	0.192663	0.418459	0.238094	0.331283	0.076542	0	0.0181565
Chr5	19912800	19913500	0.355756	0.142586	0.333072	0.288505	0.320971	0.157558	0.0316738	0.0445256
Chr5	20280000	20280200	0.490179	0.264229	0.45084	0.349886	0.541234	0.10084	0.00735294	0.111322
Chr5	20281300	20281900	0.523598	0.354966	0.534559	0.41708	0.566769	0.138264	0.00761904	0.0351391
Chr5	20398200	20398500	0.69177	0.457659	0.625295	0.482523	0.501039	0.534183	0.0640071	0.130192
Chr5	20674600	20674800	0.474777	0.239382	0.521661	0.511814	0.456314	0.361766	0.0553525	0.0329371
Chr5	20681700	20682000	0.62652	0.296235	0.556679	0.396218	0.449683	0.111125	0.0204086	0.023605
Chr5	21531600	21531800	0.592134	0.341396	0.521117	0.412108	0.553272	0.369569	0.0455671	0.0433458
Chr5	21584200	21584400	0.605916	0.288926	0.536913	0.538046	0.486488	0.3506	0.0422078	0.07293
Chr5	21776000	21777000	0.529528	0.292808	0.490502	0.428494	0.463866	0.215643	0.0182166	0.0604965
Chr5	22335100	22335600	0.63023	0.376204	0.50492	0.52412	0.576625	0.457206	0.0901669	0.0974179
Chr5	22463600	22463800	0.40507	0.171715	0.358715	0.298876	0.387826	0.273505	0.0278455	0.0597561
Chr5	23026000	23026400	0.597645	0.35773	0.558805	0.431393	0.491846	0.3817	0.176401	0.213406
Chr5	23026900	23027300	0.766784	0.434685	0.595463	0.570211	0.563325	0.470512	0.209265	0.273286
Chr5	23129900	23130100	0.405144	0.100599	0.324885	0.235658	0.350018	0.148565	0.00248139	0.0130719
Chr5	23662100	23662400	0.395881	0.184439	0.440404	0.317959	0.40923	0.3925	0.0312429	0.0924553
Chr5	24185900	24186400	0.529619	0.292529	0.559118	0.373311	0.538948	0.158472	0.018167	0.103168
Chr5	24187200	24187800	0.509778	0.263253	0.410693	0.29668	0.411402	0.129091	0.0125063	0.0244196
Chr5	24435900	24436600	0.414858	0.240045	0.43106	0.300927	0.404527	0.264559	0.0553028	0.0772876
Chr5	24448800	24449200	0.643663	0.391008	0.559732	0.305082	0.503274	0.252793	0.0256835	0.0399834
Chr5	24475400	24475600	0.598333	0.292544	0.594238	0.41647	0.489506	0.247261	0.0701473	0.0557823
Chr5	24586700	24587100	0.583628	0.387942	0.600834	0.543229	0.551639	0.460405	0.0585856	0.095292
Chr5	25178800	25179100	0.385231	0.165273	0.347963	0.281889	0.343527	0.280773	0.034291	0.0271952
Chr5	25264600	25265100	0.392813	0.242177	0.448424	0.300379	0.491992	0.125316	0.00853549	0.0655724
Chr5	25905000	25905200	0.420413	0.180452	0.446955	0.404588	0.57709	0.282129	0.0347987	0.0544571
Chr5	26072700	26073000	0.417021	0.19677	0.396624	0.360776	0.325044	0.11949	0.0195588	0.0633657
Chr5	26483600	26484000	0.401693	0.168563	0.319925	0.2531	0.293196	0.117328	0.0191049	0.0145069
Chr5	26484500	26484800	0.25461	0.0798731	0.25576	0.197756	0.148168	0.126889	0.0175438	0.039451

## Sheet: Hypo CHH DMRs in npd1a seedling
Hypomethylated CHH DMRs in nrpd1a-3 seedling
chr	start	end	WT FTL (pollen)	nrpd1a-3 FTL (pollen)	WT Col-0 (pollen)	VC-RTL (pollen)	SC-RTL (pollen)	WT Col-0 (seedling)	nrpd1a-3 (seedling)	p35S::RTL1 (seedling)
Chr1	44600	44900	0.125838	0.0832033	0.146172	0.173969	0.160868	0.303018	0.0169907	0.0394063
Chr1	56200	56600	0.157208	0.201102	0.158413	0.123749	0.108922	0.41506	0.0760952	0.0678274
Chr1	77300	77500	0.432579	0.292857	0.386051	0.413829	0.31815	0.385889	0.0508691	0.0631464
Chr1	256100	256300	0.466642	0.25461	0.421295	0.340312	0.461409	0.241568	0.0057072	0.0819841
Chr1	257700	258700	0.247579	0.15252	0.255085	0.259247	0.254956	0.350898	0.0304519	0.072906
Chr1	372400	372600	0.0555115	0.0405379	0.0270561	0.0844	0.0584519	0.266166	0.00593348	0.00619595
Chr1	431300	431500	0.243791	0.217207	0.345536	0.27983	0.348844	0.669715	0.287767	0.0887058
Chr1	433200	433900	0.111885	0.0886231	0.104172	0.0864788	0.121723	0.285659	0.0846601	0.101143
Chr1	499400	499700	0.63262	0.442365	0.552409	0.347219	0.64278	0.293855	0.0343669	0.0573137
Chr1	500000	500800	0.485562	0.388377	0.533088	0.430336	0.490885	0.237546	0.0297768	0.0905355
Chr1	512700	513100	0.287385	0.192743	0.338494	0.278649	0.320824	0.292642	0.0419465	0.0519835
Chr1	540500	541000	0.605611	0.444074	0.591834	0.560187	0.598619	0.425755	0.0579142	0.100893
Chr1	549600	549800	0.172719	0.172203	0.124929	0.150773	0.211543	0.169278	0.0153016	0.0393613
Chr1	587500	587800	0.658974	0.405983	0.551174	0.559161	0.671905	0.337689	0.105491	0.1296
Chr1	634200	634600	0.159074	0.196667	0.182797	0.277447	0.235352	0.583353	0.00601966	0.135938
Chr1	696500	696700	0.545066	0.425306	0.592694	0.446645	0.410069	0.367794	0.0541407	0.0985245
Chr1	758700	759200	0.352577	0.253355	0.402719	0.270453	0.430518	0.301962	0.00976974	0.0618259
Chr1	759800	760000	0.320309	0.27341	0.31072	0.366749	0.399664	0.121819	0.0046875	0.0506864
Chr1	822200	822400	0.362357	0.239971	0.267944	0.326412	0.406205	0.364739	0.0319195	0.0138889
Chr1	889200	889500	0.264474	0.131172	0.31697	0.151842	0.202249	0.184905	0.0113764	0.00878919
Chr1	1184900	1185200	0.178974	0.181255	0.180214	0.349515	0.290237	0.285507	0.0287555	0.0723203
Chr1	1194300	1195100	0.344349	0.227511	0.368483	0.28086	0.351748	0.357181	0.0222313	0.0924888
Chr1	1430300	1430500	0.318809	0.308092	0.399966	0.379731	0.361103	0.609927	0.272589	0.24523
Chr1	1430800	1431000	0.192646	0.231865	0.226644	0.206993	0.195784	0.663994	0.214171	0.224537
Chr1	1441500	1441700	0.378074	0.251825	0.475222	0.406486	0.307825	0.691589	0.229677	0.261753
Chr1	1444400	1444600	0.354876	0.251622	0.313917	0.304004	0.370016	0.340311	0.105263	0.0792798
Chr1	1445300	1445700	0.181744	0.124207	0.144738	0.159831	0.161703	0.200495	0.0274935	0.0491843
Chr1	1476500	1476700	0.617656	0.536339	0.5595	0.651398	0.593153	0.762334	0.116672	0.315095
Chr1	1522900	1523300	0.318531	0.161144	0.265159	0.254993	0.192022	0.172734	0.0319909	0.0745872
Chr1	1613200	1613400	0.0599522	0.0742344	0.0339972	0.145039	0.130572	0.35875	0.0289492	0.0777891
Chr1	1614500	1614700	0.0454007	0.0762906	0.10514	0.0768003	0.0686905	0.173135	0.0103617	0.0198125
Chr1	1706000	1706200	0.550056	0.412486	0.342672	0.435618	0.420438	0.283526	0.031746	0.0273464
Chr1	1876200	1876800	0.0562515	0.0537818	0.0694921	0.123718	0.0740584	0.148085	0.0413876	0.0306928
Chr1	1881900	1882300	0.0248144	0.0467538	0.0202918	0.0985859	0.0343361	0.288065	0.0162555	0.0582511
Chr1	1975100	1975500	0.282956	0.259548	0.309647	0.333681	0.302849	0.371684	0.0653642	0.0865579
Chr1	1976200	1976600	0.570802	0.491969	0.625254	0.47743	0.549311	0.232092	0.0494684	0.0938315
Chr1	2233800	2234200	0.309488	0.205382	0.356841	0.253906	0.281237	0.450561	0.0400741	0.0499563
Chr1	2340200	2340400	0.13906	0.0547485	0.176685	0.172685	0.141255	0.351386	0.0030303	0.0492908
Chr1	2472900	2473300	0.514788	0.41348	0.602062	0.568176	0.574456	0.418986	0.0468348	0.107105
Chr1	2587200	2587500	0.380511	0.286797	0.412987	0.339042	0.416238	0.32371	0.0387747	0.057899
Chr1	2588200	2588400	0.414376	0.196876	0.378367	0.25682	0.420719	0.3327	0.0788908	0.0837948
Chr1	2657600	2657900	0.1135	0.0920902	0.0563037	0.164241	0.0917716	0.411243	0.0105082	0.044002
Chr1	2788400	2788600	0.0684124	0.0482072	0.0286363	0.141909	0.0667452	0.14768	0.0146667	0.0611538
Chr1	2800500	2800700	0.133521	0.117523	0.133403	0.242631	0.247283	0.32758	0.0658054	0.186109
Chr1	2986400	2986900	0.456541	0.349719	0.551412	0.460232	0.452895	0.246398	0.0330116	0.0512396
Chr1	3023500	3023900	0.197704	0.162559	0.221252	0.213844	0.214954	0.245554	0.0256914	0.0390566
Chr1	3073200	3073900	0.381383	0.283698	0.307091	0.331109	0.328443	0.279666	0.0422994	0.0559832
Chr1	3251200	3251500	0.562766	0.425567	0.56712	0.42336	0.452717	0.416803	0.0545996	0.120828
Chr1	3412900	3413300	0.183589	0.138804	0.201499	0.231978	0.200995	0.453889	0.0376216	0.0509525
Chr1	3413700	3414200	0.568064	0.441031	0.521551	0.406339	0.621531	0.247491	0.105154	0.0616238
Chr1	3414500	3414800	0.632586	0.435318	0.59047	0.377113	0.585034	0.348888	0.0543142	0.188508
Chr1	3497800	3498100	0.339905	0.281022	0.279729	0.316466	0.273332	0.291441	0.0242167	0.0504704
Chr1	3762100	3762400	0.305858	0.131931	0.266227	0.222458	0.366752	0.204711	0.005	0.0118238
Chr1	3762700	3763000	0.51573	0.373852	0.495106	0.419776	0.426041	0.317846	0.0812154	0.0662455
Chr1	3771000	3771300	0.203636	0.127705	0.252492	0.173592	0.200012	0.32641	0.0110348	0.156273
Chr1	3780800	3781100	0.2752	0.272029	0.318987	0.236578	0.28097	0.560153	0.0418201	0.0639778
Chr1	3785500	3785700	0.300948	0.254927	0.190316	0.132444	0.343373	0.262026	0.0236071	0.0363475
Chr1	3826300	3826500	0.408804	0.31696	0.459336	0.363136	0.482683	0.247367	0.0763631	0.133318
Chr1	3826900	3827300	0.400627	0.301857	0.336842	0.367888	0.436921	0.27913	0.0327406	0.0464693
Chr1	3892100	3892500	0.0558331	0.0291502	0.0711054	0.153636	0.099444	0.306185	0.00515353	0.0136742
Chr1	3920000	3920200	0.0491709	0.0544317	0.0467241	0.065105	0.13773	0.307545	0.0122582	0.0107857
Chr1	3933100	3933400	0.587631	0.512036	0.610263	0.535376	0.537231	0.464354	0.242291	0.203035
Chr1	3980000	3980200	0.225099	0.216485	0.234016	0.192027	0.102505	0.4498	0.0143297	0.00685818
Chr1	3980700	3981000	0.341283	0.155299	0.36443	0.352283	0.192857	0.163819	0.0100992	0.0412957
Chr1	4093200	4093600	0.203919	0.242427	0.325282	0.300181	0.289113	0.343657	0.0653466	0.105986
Chr1	4094200	4094500	0.28073	0.2577	0.26087	0.208965	0.377008	0.460067	0.0811509	0.0511057
Chr1	4110300	4110800	0.198375	0.166221	0.225642	0.234682	0.224469	0.244369	0.1261	0.0799511
Chr1	4111500	4113100	0.366615	0.250562	0.394165	0.322293	0.306966	0.248579	0.0621937	0.107782
Chr1	4209200	4209600	0.320958	0.241769	0.276543	0.245404	0.27975	0.416178	0.0601706	0.076398
Chr1	4326400	4326600	0.0330925	0.0280096	0.0691466	0.10421	0.0445403	0.393042	0.00322504	0.00857488
Chr1	4406000	4406200	0.622332	0.540848	0.491354	0.550979	0.665652	0.534572	0.247842	0.175333
Chr1	4407400	4407700	0.560708	0.315293	0.382552	0.269966	0.402539	0.243511	0.0896476	0.160672
Chr1	4525100	4525400	0.0845029	0.137609	0.133428	0.19563	0.250546	0.601012	0.00430844	0.0150833
Chr1	4583000	4583500	0.480757	0.311659	0.399692	0.259497	0.408319	0.185867	0.030729	0.083218
Chr1	4658200	4658400	0.201199	0.134634	0.295746	0.281379	0.221448	0.414672	0.00717693	0.0121262
Chr1	4770100	4770700	0.557139	0.369336	0.559551	0.465456	0.578135	0.346744	0.0780078	0.11766
Chr1	4786400	4786600	0.610152	0.449317	0.537843	0.462072	0.588324	0.249488	0.0277015	0.0156772
Chr1	4787100	4787300	0.367385	0.180906	0.377291	0.345191	0.402942	0.399194	0.0347223	0.0109375
Chr1	4860300	4860500	0.0486985	0.0801606	0.0348206	0.0890661	0.0195582	0.29296	0.0219263	0.00540185
Chr1	4896500	4896800	0.13812	0.117502	0.128442	0.213396	0.197784	0.586108	0.0144751	0.044816
Chr1	4966600	4967000	0.462438	0.222469	0.40242	0.374719	0.465229	0.255374	0.0235191	0.0618544
Chr1	5056000	5056300	0.094327	0.0916756	0.192694	0.161469	0.156322	0.328139	0.0136906	0.0248417
Chr1	5098400	5098600	0.143563	0.190925	0.129182	0.22216	0.119873	0.425847	0.0421586	0.111771
Chr1	5099100	5099500	0.0672177	0.0641306	0.064934	0.0820853	0.094398	0.179226	0.0886191	0.0939454
Chr1	5101500	5102100	0.073724	0.0920824	0.0923412	0.0947244	0.145507	0.232211	0.0852631	0.0908277
Chr1	5171800	5172100	0.0368365	0.0120357	0.0529033	0.0462363	0.0748456	0.17743	0.0116895	0.0323162
Chr1	5285100	5285400	0.121936	0.0549169	0.111861	0.191778	0.150324	0.346781	0.0378781	0.0542023
Chr1	5356800	5357100	0.0805539	0.0585128	0.0724655	0.105195	0.106142	0.298089	0.027866	0.100723
Chr1	5391400	5391600	0.189555	0.130515	0.230846	0.206696	0.283341	0.556609	0.0649225	0.0454321
Chr1	5392500	5392700	0.345026	0.176246	0.34664	0.368857	0.299846	0.497149	0.0393675	0.0396023
Chr1	5436900	5437200	0.544569	0.403699	0.562871	0.493293	0.507663	0.390761	0.0422723	0.0813025
Chr1	5531300	5531900	0.470072	0.255277	0.492231	0.40199	0.476612	0.431718	0.0551294	0.102906
Chr1	5657800	5658000	0.336391	0.293381	0.237012	0.390511	0.227465	0.329895	0.0643235	0.141414
Chr1	5658500	5658800	0.24239	0.16708	0.268798	0.162306	0.330263	0.166616	0.0406774	0.0682879
Chr1	5700100	5700400	0.291192	0.264048	0.363796	0.345946	0.230608	0.226632	0.0525581	0.0558338
Chr1	5701800	5702000	0.507951	0.360553	0.496554	0.335333	0.361177	0.27812	0.0457154	0.0606871
Chr1	5798800	5799500	0.292188	0.181761	0.382206	0.293781	0.307073	0.281709	0.0262393	0.0414793
Chr1	5862900	5863500	0.526959	0.337637	0.601713	0.455972	0.47642	0.35015	0.0458704	0.140991
Chr1	5911700	5911900	0.260598	0.197585	0.341451	0.255002	0.273417	0.582339	0.14563	0.121924
Chr1	5958700	5958900	0.0790269	0.0739568	0.0839032	0.105258	0.0959435	0.297296	0.0368699	0.131315
Chr1	5965400	5965700	0.455924	0.272249	0.417918	0.441208	0.442428	0.375937	0.0995678	0.0650147
Chr1	5974900	5975100	0.258238	0.267722	0.237612	0.298924	0.276757	0.449189	0.109074	0.110006
Chr1	6075200	6075400	0.52068	0.270556	0.562903	0.481939	0.46785	0.346854	0.0479528	0.0590324
Chr1	6102700	6102900	0.273956	0.259884	0.256225	0.291628	0.260233	0.41347	0.0129209	0.0390006
Chr1	6141400	6141600	0.0492048	0.0729036	0.0451586	0.163426	0.0561288	0.233026	0.0559772	0.0162551
Chr1	6156400	6156800	0.203035	0.0963251	0.161941	0.140704	0.127409	0.301081	0.0665553	0.0774966
Chr1	6173400	6173600	0.0876015	0.0417631	0.0218002	0.0337731	0.0866502	0.267072	0.00213675	0.00961538
Chr1	6218600	6219200	0.513565	0.337606	0.518563	0.425406	0.465624	0.378905	0.116241	0.0921131
Chr1	6233900	6234100	0.225897	0.172009	0.185968	0.139373	0.259556	0.248444	0.0564196	0.0645106
Chr1	6237600	6237800	0.546256	0.369743	0.443798	0.466007	0.533861	0.424041	0.0621681	0.131811
Chr1	6403800	6404000	0.401712	0.216948	0.383592	0.305754	0.370132	0.23333	0.00719352	0.0636308
Chr1	6404500	6404900	0.340226	0.374086	0.414082	0.387334	0.484022	0.273123	0.0247887	0.0123118
Chr1	6426300	6426500	0.192917	0.16905	0.186188	0.193316	0.215523	0.328214	0.0768211	0.042629
Chr1	6454600	6454900	0.245361	0.143858	0.294306	0.243754	0.309874	0.365819	0.0508471	0.0634329
Chr1	6455500	6456000	0.407506	0.292589	0.482957	0.255092	0.424374	0.2434	0.114871	0.0874389
Chr1	6473000	6473300	0.100945	0.0586731	0.0916239	0.157308	0.163412	0.196692	0.0144438	0.015059
Chr1	6515000	6515300	0.533567	0.391206	0.668756	0.458901	0.534495	0.453259	0.0911644	0.105764
Chr1	6538400	6538600	0.722863	0.53306	0.620195	0.685281	0.680698	0.698924	0.338281	0.215443
Chr1	6538900	6539200	0.589061	0.480292	0.619161	0.460256	0.654835	0.252239	0.0748586	0.121743
Chr1	6541500	6542000	0.377379	0.314804	0.428009	0.293519	0.386849	0.182734	0.0984039	0.100388
Chr1	6543100	6543600	0.516815	0.434387	0.670943	0.467045	0.532813	0.492485	0.276699	0.108581
Chr1	6640700	6641100	0.116376	0.0861355	0.161899	0.162085	0.126466	0.336287	0.0295636	0.037129
Chr1	6704200	6705000	0.458865	0.389729	0.50994	0.455087	0.507298	0.255314	0.0534876	0.0663377
Chr1	6706900	6707200	0.144187	0.159852	0.123695	0.103418	0.172743	0.116156	0.0472939	0.0785504
Chr1	6707600	6708000	0.45274	0.345076	0.41354	0.203503	0.434866	0.187482	0.0881782	0.116204
Chr1	6735900	6736300	0.387502	0.254574	0.39862	0.270122	0.370635	0.151552	0.0130511	0.0159449
Chr1	6736700	6736900	0.510229	0.417382	0.543549	0.285791	0.472669	0.226304	0.027495	0.0388725
Chr1	6743000	6743200	0.116468	0.105639	0.146619	0.197577	0.162852	0.331255	0.0956713	0.0624509
Chr1	6744000	6744200	0.268394	0.154411	0.220424	0.287418	0.226378	0.383175	0.0404968	0.0612153
Chr1	6906100	6906500	0.619348	0.546837	0.653969	0.663631	0.648565	0.526754	0.293239	0.290111
Chr1	7036100	7036700	0.572345	0.384904	0.495668	0.433215	0.500314	0.23077	0.0418347	0.0522925
Chr1	7077800	7078000	0.273107	0.180242	0.278759	0.298933	0.293053	0.262168	0.0169532	0.0411318
Chr1	7227900	7228100	0.180693	0.0858149	0.122998	0.364787	0.264085	0.399864	0.0225469	0.162685
Chr1	7241100	7241500	0.182093	0.205745	0.218986	0.129754	0.116306	0.49668	0.0421937	0.14086
Chr1	7282100	7282700	0.453711	0.271076	0.409624	0.31837	0.344781	0.214961	0.0194081	0.0812583
Chr1	7283900	7284100	0.246096	0.129557	0.22321	0.253393	0.181008	0.184223	0.0333791	0.015035
Chr1	7344400	7344600	0.325209	0.230497	0.266905	0.251632	0.344049	0.431941	0.0696125	0.095524
Chr1	7352900	7353100	0.101398	0.0841678	0.125205	0.109523	0.107188	0.201885	0.148492	0.118969
Chr1	7365000	7365200	0.0741268	0.0682081	0.0609006	0.0720608	0.0724964	0.323525	0.0215368	0.126674
Chr1	7365700	7366000	0.136183	0.103579	0.198741	0.105896	0.154014	0.577388	0.00580937	0.0294659
Chr1	7392300	7392800	0.0887644	0.108901	0.0982044	0.0809195	0.118947	0.2279	0.027816	0.0416174
Chr1	7393100	7393400	0.22202	0.105488	0.171105	0.0900256	0.151608	0.371786	0.00699831	0.0470025
Chr1	7394400	7394700	0.0988007	0.064124	0.0617018	0.103049	0.0791717	0.07586	0.007794	0.0182321
Chr1	7714700	7715200	0.295274	0.230031	0.310616	0.316499	0.332401	0.396621	0.00464462	0.0278784
Chr1	7717400	7717800	0.284572	0.155487	0.279225	0.219503	0.365977	0.435289	0.0472365	0.0912934
Chr1	7722100	7722500	0.405407	0.212	0.326716	0.402869	0.368536	0.461189	0.0956916	0.078313
Chr1	7725300	7725600	0.29283	0.251243	0.326587	0.252264	0.259139	0.278998	0.081866	0.0953088
Chr1	7761200	7762100	0.189475	0.184557	0.222365	0.173017	0.175334	0.323008	0.0963342	0.0780893
Chr1	7787400	7787600	0.316358	0.357772	0.343169	0.291632	0.51587	0.308902	0.0788205	0.0620456
Chr1	7833500	7834200	0.342387	0.216336	0.307747	0.209235	0.341144	0.284058	0.0175267	0.0362331
Chr1	7936600	7936800	0.0841626	0.0652466	0.1462	0.193091	0.0920966	0.419268	0.0754659	0.0199993
Chr1	7960800	7961300	0.242955	0.0868632	0.14713	0.186569	0.143125	0.279608	0.0485701	0.0661215
Chr1	7974400	7974600	0.00315987	0.0142201	0.00449578	0.00698791	0.00234192	0.00797467	0.0238849	0.0447269
Chr1	7975900	7976200	0.26227	0.131649	0.322414	0.221202	0.313299	0.363153	0.0139956	0.0440909
Chr1	7985100	7985500	0.303941	0.220705	0.34545	0.2131	0.326311	0.281224	0.0356147	0.0570853
Chr1	7986200	7986400	0.444968	0.411277	0.573904	0.306117	0.512202	0.233653	0.013177	0.122379
Chr1	8016400	8016600	0.358981	0.287714	0.400061	0.406145	0.366068	0.601632	0.0699793	0.109987
Chr1	8114700	8114900	0.444958	0.36538	0.541073	0.404197	0.46249	0.267751	0.0025	0.0734244
Chr1	8115500	8116200	0.57059	0.408556	0.551081	0.502919	0.481011	0.324522	0.0170518	0.0515192
Chr1	8169400	8170100	0.310024	0.205751	0.332217	0.219461	0.324893	0.211791	0.00901974	0.0466704
Chr1	8201300	8201500	0.248895	0.178027	0.352418	0.240465	0.293891	0.306771	0.0553944	0.056868
Chr1	8254800	8255000	0.0890064	0.128087	0.0403121	0.170121	0.277091	0.375042	0.0846357	0.0493243
Chr1	8267100	8267600	0.280406	0.250709	0.357644	0.308774	0.37471	0.298049	0.0542082	0.0462134
Chr1	8272500	8273000	0.0646495	0.0717348	0.0772107	0.104043	0.0700739	0.198707	0.0459999	0.0524857
Chr1	8277300	8277700	0.178957	0.135795	0.172849	0.206166	0.165563	0.23882	0.0854089	0.0895417
Chr1	8289500	8290000	0.165292	0.0964413	0.175029	0.150035	0.188794	0.183686	0.0295877	0.0468145
Chr1	8290500	8290900	0.359236	0.305781	0.427454	0.40443	0.474904	0.255257	0.0188339	0.0877706
Chr1	8319600	8319800	0.0649651	0.0560406	0.0647644	0.122397	0.0574112	0.316128	0.0466079	0.0282656
Chr1	8471900	8472100	0.254269	0.191203	0.0457966	0.212814	0.178845	0.278803	0.00377632	0.0126163
Chr1	8472500	8472700	0.185799	0.149945	0.131124	0.149407	0.118567	0.19771	0.0152338	0.023492
Chr1	8473300	8473500	0.058471	0.0642665	0.130983	0.161582	0.0728408	0.294787	0.0154283	0.0256122
Chr1	8488400	8489100	0.52869	0.421162	0.474924	0.444591	0.458421	0.302471	0.0858495	0.122755
Chr1	8490100	8490400	0.518954	0.422028	0.618651	0.293982	0.480711	0.302792	0.0778917	0.159305
Chr1	8538700	8539000	0.0867362	0.108303	0.0937421	0.136956	0.133159	0.334432	0.00666915	0.0309871
Chr1	8539500	8539800	0.471252	0.302621	0.481713	0.394559	0.492016	0.290722	0.0670484	0.0602127
Chr1	8577500	8577700	0.340093	0.255318	0.385959	0.40079	0.370197	0.245224	0.0203692	0.0679759
Chr1	8681900	8682100	0.388317	0.252401	0.514764	0.361901	0.293705	0.492649	0.118172	0.0867556
Chr1	8723200	8723500	0.373255	0.275705	0.378887	0.360132	0.404305	0.268719	0.0390313	0.0644247
Chr1	8733400	8733600	0.0824263	0.0459665	0.0578334	0.0916113	0.085257	0.402509	0.0659765	0.0678079
Chr1	8775600	8775800	0.206929	0.274405	0.179167	0.0715278	0.0858586	0.605844	0.0125392	0
Chr1	8798100	8798400	0.209197	0.122386	0.237406	0.183196	0.242687	0.477686	0.0427742	0.0269426
Chr1	8812500	8812800	0.175641	0.284722	0.198219	0.304143	0.0633478	0.541458	0.050934	0
Chr1	8869600	8869800	0.109587	0.113156	0.189886	0.120912	0.149057	0.471816	0.0646159	0.151728
Chr1	8870300	8870700	0.432354	0.291392	0.305639	0.363521	0.339271	0.322945	0.115673	0.122218
Chr1	8927600	8927800	0.0364226	0.0716737	0.0550691	0.242135	0.0327292	0.396972	0.0711219	0.0958959
Chr1	9004800	9005200	0.194404	0.167816	0.253284	0.174913	0.289486	0.480621	0.125192	0.165635
Chr1	9062100	9062300	0.367193	0.243851	0.363832	0.382628	0.330095	0.344899	0.0345314	0.0647247
Chr1	9077600	9077800	0.187407	0.163672	0.216291	0.171578	0.23397	0.229027	0.0570585	0.0746573
Chr1	9082700	9082900	0.16511	0.145142	0.151552	0.220231	0.202248	0.352262	0.0212763	0.0154023
Chr1	9174300	9174600	0.0834766	0.0825651	0.081906	0.201156	0.17071	0.54274	0.0380787	0.0683883
Chr1	9175300	9175900	0.126261	0.110518	0.118982	0.13398	0.134629	0.424733	0.0699121	0.0704948
Chr1	9177500	9177700	0.0909881	0.0882217	0.118323	0.140422	0.118744	0.297203	0.162445	0.129437
Chr1	9304800	9305100	0.293798	0.217856	0.278618	0.306175	0.286894	0.312136	0.0430788	0.0870827
Chr1	9305400	9305800	0.119581	0.101119	0.078025	0.157906	0.0865172	0.239926	0.0588191	0.112886
Chr1	9373400	9373700	0.0786989	0.0593149	0.0797694	0.144441	0.0959247	0.2607	0.0386606	0.0486413
Chr1	9384100	9384500	0.4357	0.315828	0.448115	0.369799	0.454386	0.358337	0.0365311	0.0816286
Chr1	9418100	9418300	0.486029	0.409832	0.458582	0.450705	0.486756	0.353885	0.0162338	0.094721
Chr1	9572400	9572600	0.0973863	0.0203455	0.0631519	0.125909	0.009768	0.236869	0.00731096	0.0541294
Chr1	9587200	9587700	0.283196	0.245287	0.247464	0.173014	0.306135	0.220285	0.0139739	0.0547793
Chr1	9626700	9627200	0.0498785	0.0310818	0.047343	0.0881706	0.0667487	0.228946	0.0939457	0.0534653
Chr1	9676500	9676800	0.164517	0.116945	0.203471	0.134349	0.20842	0.392768	0.125875	0.17861
Chr1	9691100	9691300	0.154243	0.169412	0.182634	0.246296	0.173127	0.46199	0.108343	0.0530288
Chr1	9706300	9706700	0.202021	0.162346	0.219193	0.179316	0.136116	0.283998	0.0285969	0.0318755
Chr1	9754400	9755200	0.327325	0.250631	0.422728	0.290678	0.293944	0.229437	0.0183956	0.0162385
Chr1	9755800	9756500	0.334069	0.311207	0.368312	0.363826	0.355686	0.271641	0.00920934	0.0246943
Chr1	9762600	9762800	0.0855589	0.106811	0.154571	0.16637	0.109966	0.472383	0.0265562	0.011822
Chr1	9811800	9812500	0.0510029	0.0456019	0.0915557	0.0770693	0.0633012	0.324539	0.00979698	0.00460318
Chr1	9817400	9817600	0.633328	0.404325	0.576437	0.385712	0.533406	0.281394	0.0272791	0.0439042
Chr1	9865900	9866100	0.36226	0.323456	0.410243	0.204173	0.475982	0.187175	0.0228372	0.0123106
Chr1	9866400	9866800	0.510912	0.461577	0.506503	0.408629	0.529438	0.119743	0.0129234	0.0164366
Chr1	9915400	9915600	0.0919833	0.0785449	0.0808484	0.104054	0.0871226	0.156211	0.0236985	0.0325807
Chr1	9918900	9919300	0.240184	0.164888	0.266892	0.200686	0.242821	0.222017	0.0559443	0.087706
Chr1	9939400	9939600	0.0290567	0.0598075	0.0609545	0.0947582	0.0779517	0.23571	0.0133184	0.0179582
Chr1	10013200	10013500	0.0217822	0.0167966	0.0360476	0.162376	0.0971738	0.174291	0.00904528	0.0209872
Chr1	10021400	10022000	0.384573	0.307752	0.389939	0.397211	0.383166	0.323284	0.0304255	0.0912109
Chr1	10156600	10156800	0.0601744	0.0557963	0.0365588	0.158724	0.0855462	0.229467	0.00444079	0.0132167
Chr1	10206700	10207000	0.165902	0.103795	0.238565	0.204102	0.15937	0.31364	0.0389074	0.0190901
Chr1	10221100	10221300	0.0218132	0.0517862	0.0271063	0.052356	0.0711694	0.255517	0.00421456	0.00697684
Chr1	10315000	10315500	0.205884	0.116905	0.164539	0.150941	0.168846	0.179952	0.0205665	0.0341751
Chr1	10330000	10330200	0.0858265	0.0648326	0.0063492	0.00714285	0.00613503	0.0153788	0.00231482	0.0162665
Chr1	10349200	10349400	0.444705	0.303048	0.443373	0.309891	0.412061	0.498313	0.104313	0.102903
Chr1	10421400	10421600	0.138592	0.153549	0.204162	0.124407	0.135289	0.379054	0.11279	0.0739302
Chr1	10506600	10507300	0.124397	0.130741	0.123504	0.13171	0.17188	0.280057	0.0654977	0.0731673
Chr1	10512700	10512900	0.0616196	0.0455346	0.0599833	0.0505679	0.0562905	0.195731	0.0252822	0.0214327
Chr1	10527100	10527300	0.339959	0.200792	0.388574	0.277226	0.395843	0.180235	0.0636571	0.0771728
Chr1	10528600	10528900	0.186827	0.185635	0.314628	0.256001	0.173877	0.381339	0.102403	0.110816
Chr1	10568200	10568600	0.251569	0.278241	0.297087	0.253521	0.273497	0.206729	0.0574875	0.0702962
Chr1	10568900	10569100	0.418849	0.264339	0.364042	0.296839	0.317846	0.175519	0.0232565	0.0338627
Chr1	10570200	10570400	0.0755136	0.0560965	0.0883566	0.108668	0.106236	0.292555	0.0362595	0.0508993
Chr1	10579400	10579600	0.373741	0.24909	0.314071	0.311657	0.352439	0.264462	0.0569398	0.0294468
Chr1	10597600	10598200	0.423783	0.287262	0.534522	0.4587	0.419452	0.297245	0.036077	0.0371913
Chr1	10624000	10624600	0.118598	0.0855379	0.223671	0.169209	0.0820545	0.342883	0.0415362	0.0671079
Chr1	10801300	10801500	0.0179071	0.10424	0.199652	0.162787	0.202282	0.414343	0.012547	0.0282237
Chr1	10802400	10803400	0.200826	0.128467	0.189085	0.156179	0.191942	0.284386	0.0328677	0.0440342
Chr1	10852700	10853200	0.459847	0.336551	0.5689	0.39923	0.535408	0.230243	0.02155	0.0355705
Chr1	10867200	10867800	0.296188	0.181892	0.216493	0.18066	0.229991	0.202418	0.00970893	0.0121398
Chr1	10922400	10922600	0.0491046	0.0633063	0.111273	0.149874	0.0699018	0.13616	0.0575046	0.0232122
Chr1	10924700	10925000	0.164367	0.123635	0.171018	0.197723	0.241324	0.329948	0.0644419	0.0380109
Chr1	11051300	11051500	0.132992	0.0879661	0.134353	0.144932	0.217994	0.263479	0.0435385	0.042058
Chr1	11129000	11129200	0.316973	0.301765	0.325681	0.306343	0.284287	0.601	0.328418	0.193841
Chr1	11174200	11174500	0.387698	0.253254	0.395502	0.34484	0.401992	0.257277	0.00367965	0.0792012
Chr1	11212400	11212600	0.106351	0.0434799	0.191282	0.159026	0.0997701	0.439456	0.00252525	0.0514543
Chr1	11259100	11259700	0.162573	0.129527	0.176005	0.209093	0.134072	0.211669	0.0213753	0.0303826
Chr1	11277000	11277300	0.145975	0.0925034	0.145129	0.134977	0.181886	0.289369	0.0203647	0.00718321
Chr1	11286600	11286800	0.356777	0.320489	0.235993	0.271003	0.386279	0.223107	0.01142	0.0560008
Chr1	11287500	11287700	0.295503	0.211795	0.403534	0.218161	0.287701	0.118472	0.0239572	0.0825659
Chr1	11301000	11301700	0.103667	0.0492714	0.0973952	0.145523	0.0809884	0.293876	0.0361087	0.0420886
Chr1	11351500	11351700	0.214646	0.152694	0.331228	0.210587	0.260469	0.321893	0.0923769	0.042015
Chr1	11409800	11410200	0.257979	0.183421	0.222357	0.193736	0.334506	0.254604	0.027812	0.0341994
Chr1	11422000	11422300	0.0679235	0.137	0.124392	0.225064	0.144878	0.396498	0.00469319	0.00914602
Chr1	11428200	11428400	0.176291	0.194292	0.266747	0.243519	0.176266	0.401358	0.00999227	0.0311358
Chr1	11586000	11586300	0.226103	0.183263	0.359541	0.253995	0.274089	0.160084	0.0175688	0.0321242
Chr1	11620600	11620800	0.30764	0.188437	0.370075	0.317738	0.29727	0.64739	0.0756693	0.0969008
Chr1	11636900	11637100	0.0312115	0.0480864	0.0478038	0.0439383	0.0604447	0.350082	0.0960866	0.0783708
Chr1	11644300	11644600	0.134943	0.0815279	0.153984	0.175481	0.14798	0.327759	0.0400364	0.0200472
Chr1	11649800	11650000	0.181642	0.130669	0.212431	0.196376	0.182411	0.318827	0.00189394	0.0649732
Chr1	11666800	11667000	0.149953	0.155698	0.315874	0.205602	0.276152	0.237818	0.00568182	0.118306
Chr1	11700900	11701100	0.555959	0.515892	0.548793	0.373666	0.559041	0.232051	0.0188202	0.029275
Chr1	11701500	11701700	0.583106	0.314458	0.68525	0.434488	0.431706	0.23631	0	0.00757577
Chr1	11710700	11711000	0.323641	0.157665	0.181875	0.203396	0.302729	0.262398	0.074835	0.0243054
Chr1	11711500	11711900	0.129111	0.141868	0.161772	0.205176	0.142171	0.332315	0.0140208	0.05962
Chr1	11721900	11722400	0.265115	0.171311	0.215572	0.238516	0.182353	0.2465	0.01219	0.0345569
Chr1	11732600	11732900	0.416053	0.348135	0.451802	0.441331	0.482589	0.213777	0.0612624	0.0999678
Chr1	11752300	11752600	0.194475	0.161448	0.213766	0.180174	0.226648	0.334755	0.0904956	0.0741652
Chr1	11754600	11755000	0.103732	0.106159	0.171073	0.229311	0.188925	0.213471	0.0452971	0.0650107
Chr1	11793900	11794100	0.0459831	0.0498694	0.0976355	0.0524639	0.149819	0.152349	0.0425841	0.112344
Chr1	11805000	11805300	0.0116252	0.0135027	0.0841419	0.129624	0.116197	0.276088	0.0494128	0.0170434
Chr1	11807700	11808200	0.0723847	0.067632	0.073422	0.123575	0.0763884	0.370243	0.103145	0.0708415
Chr1	11817700	11817900	0.157349	0.153479	0.151354	0.211247	0.139792	0.346894	0.0990394	0.051514
Chr1	11822300	11822500	0.0942804	0.119156	0.0781857	0.0899955	0.105791	0.470231	0.144478	0.108294
Chr1	11834600	11834800	0.140574	0.145043	0.251817	0.234337	0.247019	0.386116	0.0473554	0.127835
Chr1	11930600	11930900	0.153009	0.0770649	0.0967971	0.0700373	0.202526	0.413407	0.00882938	0.02573
Chr1	11935000	11935200	0.0050505	0.0134673	0.188016	0.109686	0.158923	0.142765	0.00595238	0.0166667
Chr1	11957900	11958100	0.0468373	0.036836	0.0799382	0.11961	0.121923	0.247247	0.0470987	0.0263399
Chr1	11988000	11988200	0.497606	0.413582	0.419825	0.323004	0.451988	0.217111	0.00852714	0.0502039
Chr1	12012600	12013000	0.113004	0.0558301	0.110363	0.12349	0.159186	0.389252	0.00903178	0.0537982
Chr1	12050300	12050500	0.146185	0.179842	0.106916	0.236001	0.213316	0.401029	0.0567413	0.0271428
Chr1	12059900	12060100	0.0714365	0.0944802	0.100305	0.104597	0.073922	0.357064	0.166684	0.0660069
Chr1	12097500	12097900	0.365297	0.369424	0.492349	0.3794	0.314383	0.243487	0.0529317	0.0665527
Chr1	12138800	12139000	0.0860949	0.106262	0.167772	0.184225	0.227651	0.560176	0.185381	0.0553064
Chr1	12166800	12167000	0.0542285	0.0550448	0.0913677	0.053137	0.0688347	0.247393	0.0391328	0.0222969
Chr1	12183400	12184000	0.370365	0.240249	0.392533	0.307167	0.397933	0.322648	0.0391792	0.0847789
Chr1	12218700	12219000	0.0896682	0.055039	0.0325706	0.0986851	0.0974136	0.0671104	0.00317883	0.0238038
Chr1	12240500	12240900	0.482921	0.284792	0.345611	0.334025	0.439708	0.346805	0.0715939	0.100355
Chr1	12286700	12286900	0.137338	0.190137	0.261165	0.19367	0.202863	0.319303	0.0819979	0.0757788
Chr1	12287400	12287600	0.114678	0.0712034	0.123063	0.108768	0.0723644	0.205466	0.0496128	0.204459
Chr1	12302900	12303200	0.136129	0.133428	0.175377	0.252429	0.297231	0.504694	0.0137193	0.0486665
Chr1	12457700	12458200	0.281922	0.173922	0.359288	0.263257	0.351366	0.293593	0.0298903	0.0379954
Chr1	12530200	12530400	0.162314	0.137479	0.190639	0.306146	0.143549	0.475822	0.047944	0.0416561
Chr1	12594600	12594900	0.0840912	0.0888203	0.0859009	0.130558	0.0914839	0.27638	0.01992	0.0588217
Chr1	12618500	12618700	0.177937	0.173106	0.192744	0.33265	0.154449	0.199453	0.00343681	0.0732811
Chr1	12684700	12685000	0.114957	0.0554087	0.065671	0.0812985	0.0617898	0.259204	0.0582764	0.0692368
Chr1	12738300	12738500	0.149548	0.135594	0.175304	0.149143	0.202392	0.338849	0.06937	0.0447512
Chr1	12845900	12846100	0.237482	0.231655	0.262047	0.196295	0.237845	0.203197	0.0445544	0.0265199
Chr1	12853900	12854300	0.148032	0.159144	0.231948	0.210977	0.200989	0.341487	0.037184	0.0336419
Chr1	12894700	12895500	0.136805	0.0885927	0.109702	0.144759	0.143823	0.207993	0.0385194	0.0313416
Chr1	12896300	12896500	0.13086	0.111026	0.215195	0.227824	0.181002	0.475796	0.0581172	0.044838
Chr1	12993000	12993200	0.402176	0.346628	0.497689	0.356763	0.380183	0.220572	0.0443544	0.0887495
Chr1	13027900	13028100	0.030781	0.0411945	0.0751513	0.0672336	0.03437	0.209926	0.0278124	0.0122842
Chr1	13030300	13030500	0.333902	0.206274	0.288716	0.339941	0.356696	0.599166	0.0852888	0.158079
Chr1	13075700	13075900	0.115159	0.0638418	0.151614	0.249479	0.185249	0.462951	0.00984848	0.0149512
Chr1	13126900	13127100	0.0885486	0.0770001	0.0732459	0.0950247	0.103537	0.368078	0.0274862	0.0328215
Chr1	13130000	13130200	0.108188	0.104237	0.06794	0.181024	0.180116	0.196438	0.0460454	0.0336849
Chr1	13148300	13148500	0.0266913	0.0672787	0.0352366	0.0857377	0.0587386	0.434903	0.0328437	0.0564093
Chr1	13156100	13156300	0.287143	0.234619	0.361464	0.227528	0.265117	0.506156	0.0335618	0.026664
Chr1	13166200	13166500	0.356261	0.348178	0.328956	0.486986	0.469682	0.202037	0.0582268	0.078689
Chr1	13192300	13192600	0.0309444	0.036478	0.0566331	0.0811233	0.0397843	0.329564	0.0214943	0.0235956
Chr1	13215500	13215700	0.105062	0.0715189	0.135161	0.155725	0.121264	0.19307	0.0151008	0.0168606
Chr1	13357100	13357400	0.0598114	0.07281	0.0754739	0.170153	0.0926526	0.241799	0.0126578	0.0290763
Chr1	13544600	13544800	0.189581	0.13174	0.02578	0.227311	0.0997612	0.43028	0.0225028	0.0533475
Chr1	13568000	13568200	0.274016	0.230025	0.510253	0.136942	0.290964	0.162229	0.0460855	0.0949095
Chr1	13667300	13667500	0.54841	0.411722	0.415896	0.423097	0.400456	0.411259	0.0816021	0.0805481
Chr1	13704100	13704300	0.332546	0.201661	0.221445	0.19431	0.26928	0.246409	0.0819594	0.0839332
Chr1	13837800	13838000	0.040552	0.0610074	0.031501	0.094027	0.0302188	0.342464	0.0202354	0.00775221
Chr1	13906800	13907000	0.224946	0.125335	0.240983	0.237659	0.143771	0.356416	0.176128	0.146547
Chr1	14024400	14024600	0.0966627	0.0552694	0.11542	0.262007	0.160591	0.38731	0.0444075	0.080629
Chr1	14164200	14164600	0.114764	0.135508	0.151954	0.2013	0.168769	0.402241	0.0218129	0.0672659
Chr1	14165900	14166100	0.0401643	0.0492705	0.0821124	0.103549	0.0236082	0.296066	0	0.0682286
Chr1	14298800	14299000	0.357841	0.166752	0.306585	0.306821	0.301926	0.256297	0.0296103	0.0290674
Chr1	15610300	15610500	0.42826	0.392103	0.485225	0.265383	0.357552	0.513582	0.0847028	0.155008
Chr1	15935500	15935700	0.162019	0.143363	0.209847	0.221974	0.244803	0.313223	0.0465863	0.0286941
Chr1	16124900	16125300	0.0482909	0.0489527	0.0149328	0.0511137	0.0490122	0.144443	0.037951	0.024473
Chr1	16418600	16419000	0.130304	0.129638	0.11453	0.238126	0.114987	0.4222	0.0196261	0.021752
Chr1	16477600	16478100	0.471228	0.379892	0.507341	0.326432	0.424018	0.370837	0.0728701	0.148484
Chr1	16562200	16562400	0.154883	0.115607	0.151153	0.107329	0.0928852	0.237318	0.007752	0.0255248
Chr1	16624500	16624700	0.301028	0.311509	0.42847	0.35256	0.448006	0.641187	0.0832978	0.0677149
Chr1	16645800	16646000	0.158104	0.101782	0.0952648	0.163914	0.103854	0.367223	0.0177212	0.0379119
Chr1	16673600	16673800	0.0939469	0.118354	0.0242082	0.118216	0.145234	0.393397	0.114556	0.0911966
Chr1	16712500	16712700	0.202431	0.206541	0.27183	0.158296	0.245584	0.171841	0.0117143	0.00861111
Chr1	16773500	16773800	0.146978	0.117172	0.207573	0.194435	0.227841	0.245208	0.0246094	0.0258681
Chr1	16792100	16792500	0.046258	0.0270466	0.0724755	0.0472288	0.0520467	0.166018	0.00378307	0.0174687
Chr1	16807700	16807900	0.496412	0.438995	0.340017	0.405292	0.37751	0.336098	0.00698926	0.0164983
Chr1	16810800	16811000	0.0322451	0.0320007	0.0393983	0.10027	0.0845244	0.221821	0.0379709	0.0376737
Chr1	16870200	16870400	0.310213	0.266216	0.218845	0.231338	0.242152	0.287505	0.0220714	0.0707323
Chr1	16889900	16890100	0.370819	0.318898	0.401384	0.332021	0.257699	0.188807	0.0167443	0.0192385
Chr1	16937900	16938100	0.0645669	0.177104	0.0195797	0.039958	0.0947332	0.244539	0.0112784	0.0340142
Chr1	16939100	16939400	0.187886	0.125253	0.203752	0.101792	0.175046	0.329713	0.0370855	0.0358554
Chr1	16997800	16998100	0.504005	0.359931	0.450809	0.351791	0.454424	0.167912	0.0245092	0.0261661
Chr1	17006900	17007400	0.0335493	0.0384118	0.0424463	0.119495	0.0518908	0.294219	0.015295	0.00721935
Chr1	17016500	17016700	0.0223896	0.0307849	0.0207723	0.00523104	0.00570513	0.0887672	0.0138097	0.020505
Chr1	17064800	17065000	0.390139	0.202785	0.386909	0.286632	0.374628	0.490283	0.0769082	0.272208
Chr1	17076900	17077300	0.278089	0.247598	0.269768	0.282047	0.305547	0.309027	0.0739335	0.0597803
Chr1	17094500	17094900	0.234936	0.209501	0.146345	0.0730913	0.16014	0.0540654	0	0.0150713
Chr1	17152700	17152900	0.0627364	0.0644478	0.0674123	0.120375	0.0574557	0.429309	0.027413	0.0256629
Chr1	17201500	17202000	0.204812	0.192848	0.191599	0.150683	0.266054	0.184677	0.0214031	0.0343467
Chr1	17267000	17267300	0.0806028	0.0800753	0.089553	0.166687	0.0825804	0.358559	0.0510066	0.0315964
Chr1	17267600	17268100	0.103912	0.105719	0.109252	0.15408	0.109653	0.179571	0.043958	0.0671403
Chr1	17282400	17282600	0.0875515	0.0433773	0.144215	0.225306	0.0802227	0.474788	0.0284581	0.0798126
Chr1	17289100	17289500	0.218229	0.108654	0.225411	0.418748	0.324774	0.483341	0.137998	0.123762
Chr1	17332600	17332800	0.456082	0.337051	0.335258	0.449759	0.563217	0.193477	0.0347605	0.0437823
Chr1	17335400	17335700	0.235783	0.205315	0.250785	0.219852	0.135975	0.425195	0.0101953	0.00944933
Chr1	17369000	17369200	0.193605	0.0946847	0.188104	0.193408	0.183095	0.335894	0.101741	0.0782777
Chr1	17502200	17502800	0.47595	0.323368	0.449908	0.388915	0.47673	0.331909	0.0912998	0.106232
Chr1	17507000	17507200	0.0564182	0.0598333	0.0866574	0.0628927	0.0872425	0.215616	0.0169075	0.0297105
Chr1	17560800	17561000	0.0366681	0.0215998	0.14168	0.100026	0.10523	0.390608	0.0118499	0.0306677
Chr1	17563600	17563900	0.318498	0.191284	0.179613	0.177485	0.321721	0.340017	0.0524377	0.0515991
Chr1	17605500	17605900	0.42212	0.190726	0.376372	0.344997	0.431921	0.274782	0.0358157	0.064518
Chr1	17632400	17632700	0.327012	0.199578	0.42235	0.292786	0.260338	0.369457	0.0455408	0.126597
Chr1	17655200	17655400	0.0630648	0.0408448	0.0519039	0.0450383	0.0332989	0.229872	0.0457817	0.041244
Chr1	17685500	17686000	0.326931	0.296595	0.445937	0.229375	0.329088	0.143774	0.0120572	0.0523808
Chr1	17689600	17689900	0.146795	0.163599	0.185753	0.195805	0.159334	0.392318	0.0529364	0.0890185
Chr1	17690300	17690600	0.0585585	0.0439532	0.0927242	0.158633	0.171442	0.368901	0.100132	0.0622862
Chr1	17710600	17710800	0.38061	0.307918	0.462263	0.295793	0.365687	0.241907	0.0114998	0.0503493
Chr1	17714200	17714500	0.432573	0.205704	0.252146	0.189228	0.202921	0.22516	0.0539783	0.0845321
Chr1	17727000	17727300	0.126584	0.068075	0.195065	0.239433	0.180167	0.379857	0.00508751	0.104553
Chr1	17727600	17727900	0.178132	0.13671	0.210434	0.235959	0.242713	0.188611	0.00540729	0.0314723
Chr1	17812200	17812400	0.306623	0.192301	0.299011	0.183111	0.304894	0.468528	0.0627158	0.102367
Chr1	17831300	17831500	0.0181263	0.0391431	0.0488	0.0655689	0.0347082	0.130339	0.0140931	0.0151222
Chr1	17840600	17840900	0.089054	0.0319776	0.0591469	0.120471	0.0414345	0.493003	0.0104319	0.0118818
Chr1	17874100	17874400	0.0762805	0.0658473	0.136409	0.205468	0.0744327	0.362944	0.060453	0.101546
Chr1	17937700	17938000	0.248259	0.243325	0.263803	0.247008	0.212372	0.261193	0.0553783	0.0743743
Chr1	17978900	17979100	0.104797	0.0975735	0.0490306	0.102834	0.111552	0.417337	0.0837697	0.0639301
Chr1	18047900	18048200	0.0514292	0.0335966	0.0801564	0.157839	0.0992929	0.320106	0.0358142	0.025545
Chr1	18055900	18056100	0.067109	0.0657396	0.0934788	0.227881	0.0799937	0.57488	0.0300794	0.0188492
Chr1	18110800	18111400	0.0629373	0.102809	0.0660246	0.132183	0.0677768	0.36993	0.0430388	0.0321251
Chr1	18126600	18126800	0.318437	0.255866	0.386152	0.325051	0.393813	0.313423	0.0758048	0.0194197
Chr1	18130400	18131000	0.143954	0.0940021	0.179811	0.149513	0.171407	0.196801	0.0282364	0.0302066
Chr1	18135900	18136100	0.118998	0.0880664	0.189623	0.196721	0.146965	0.41489	0.00714285	0.0414462
Chr1	18164500	18164700	0.142914	0.131521	0.179322	0.262442	0.260922	0.514193	0.0187126	0.223811
Chr1	18165300	18165600	0.268065	0.22955	0.276636	0.166738	0.206001	0.224156	0.0635855	0.142782
Chr1	18211600	18211800	0.156295	0.101738	0.156577	0.258291	0.188342	0.419763	0.0672719	0.108927
Chr1	18213900	18214500	0.0498833	0.0419127	0.0553827	0.0979687	0.0483208	0.162014	0.0142617	0.0259162
Chr1	18287300	18287500	0.372375	0.362902	0.402972	0.416964	0.455768	0.251671	0.0514848	0.059904
Chr1	18297500	18297700	0.243766	0.150534	0.26412	0.356161	0.325802	0.504637	0.0232339	0.026304
Chr1	18320600	18321400	0.269194	0.161608	0.314881	0.245933	0.308609	0.421869	0.0149589	0.0610874
Chr1	18380300	18380500	0.0586839	0.0371903	0.0605297	0.102631	0.0582299	0.221791	0.0166866	0.035178
Chr1	18458100	18458300	0.0313796	0.0356187	0.00206612	0.0172298	0.0266053	0.0286401	0.0040404	0.0105063
Chr1	18551500	18551700	0.395794	0.144594	0.417295	0.269102	0.307839	0.329117	0.0277778	0.0399712
Chr1	18598900	18599100	0.178631	0.0987056	0.208478	0.19036	0.0761958	0.346165	0.013373	0.0446888
Chr1	18599800	18600100	0.39218	0.326529	0.337541	0.337932	0.428573	0.173243	0.0269709	0.0736823
Chr1	18626800	18627300	0.329538	0.138097	0.251888	0.190144	0.335302	0.384707	0.0199751	0.0951225
Chr1	18632100	18633000	0.311984	0.160937	0.298689	0.294083	0.331743	0.262663	0.0202271	0.0643422
Chr1	18633300	18633800	0.310678	0.226641	0.267071	0.23786	0.28589	0.237055	0.013168	0.0626298
Chr1	18746100	18746300	0.48757	0.420889	0.585493	0.418465	0.546702	0.27585	0.0761461	0.0872624
Chr1	18766000	18766200	0.367236	0.358174	0.334969	0.428721	0.36011	0.166031	0.00978991	0.0165306
Chr1	18790700	18791000	0.391277	0.280625	0.386773	0.326252	0.411773	0.180756	0.0376549	0.0747246
Chr1	18791300	18791800	0.422588	0.373387	0.515197	0.436475	0.5743	0.153402	0.0174681	0.0322344
Chr1	18792100	18792300	0.484823	0.354714	0.381823	0.321705	0.465753	0.366644	0.00792813	0.106712
Chr1	18804600	18805100	0.32408	0.214463	0.424419	0.302111	0.434297	0.227576	0.0146349	0.0608752
Chr1	18859300	18859700	0.0425971	0.130237	0.0802385	0.11851	0.117175	0.340187	0.0153673	0.104396
Chr1	18887800	18888100	0.081667	0.059386	0.0382279	0.0948687	0.0320599	0.28036	0.0344196	0.0493488
Chr1	18930900	18931200	0.202263	0.120202	0.164657	0.194757	0.268272	0.587923	0.00163934	0.034933
Chr1	19026900	19027100	0.362845	0.34428	0.587107	0.324086	0.337411	0.403327	0.0645425	0.0647729
Chr1	19027700	19027900	0.379863	0.272445	0.389925	0.383052	0.34651	0.231986	0.0200751	0.0881775
Chr1	19086300	19086800	0.260425	0.21488	0.288736	0.222828	0.268144	0.279185	0.0329699	0.088643
Chr1	19145600	19145900	0.277475	0.202521	0.294712	0.296606	0.308512	0.323172	0.0242845	0.0476125
Chr1	19172300	19172500	0.344034	0.195746	0.28517	0.226503	0.341907	0.195649	0.0300132	0.0313625
Chr1	19197900	19198200	0.0619634	0.0555528	0.083849	0.0644554	0.107627	0.302006	0.0147457	0.017795
Chr1	19219900	19220200	0.246795	0.2161	0.195032	0.252797	0.180945	0.234921	0.0480126	0.0216292
Chr1	19226300	19226600	0.0759215	0.0482996	0.030399	0.0693609	0.040043	0.327254	0.0118452	0.0155948
Chr1	19247900	19248300	0.200187	0.11934	0.223709	0.133472	0.177981	0.159259	0.00552858	0.0552143
Chr1	19249000	19249400	0.119444	0.153254	0.181854	0.116971	0.208542	0.242406	0.0350717	0.0259921
Chr1	19303800	19304500	0.119388	0.137578	0.149414	0.180641	0.122765	0.42453	0.0138923	0.0819621
Chr1	19336300	19336700	0.192435	0.156008	0.221871	0.134795	0.225309	0.51965	0.16707	0.145873
Chr1	19345400	19345600	0.146815	0.108206	0.196285	0.181315	0.170463	0.444322	0.139241	0.0789347
Chr1	19352800	19353500	0.265353	0.189075	0.291633	0.260894	0.270248	0.326677	0.0417265	0.0612315
Chr1	19368500	19368700	0.108379	0.0640295	0.115517	0.136024	0.133924	0.33981	0.0548366	0.0848594
Chr1	19380600	19380800	0.36757	0.197523	0.258543	0.179804	0.28536	0.363699	0.100062	0.0842552
Chr1	19404000	19404300	0.167629	0.184427	0.20268	0.151405	0.194932	0.193432	0.0196302	0.0455155
Chr1	19426800	19427000	0.145776	0.0603694	0.174387	0.102854	0.153676	0.241545	0.0242659	0.0223397
Chr1	19428700	19429000	0.0438512	0.0307077	0.0369695	0.0568213	0.0160244	0.1141	0.0111269	0.0264375
Chr1	19430100	19430600	0.11763	0.0850982	0.0878144	0.0942207	0.0950978	0.270028	0.0246097	0.0485887
Chr1	19465100	19465300	0.455913	0.32477	0.456437	0.457954	0.542435	0.218938	0.0138889	0.105239
Chr1	19465600	19465900	0.484567	0.371045	0.542722	0.38508	0.421302	0.228683	0.0217113	0.0218353
Chr1	19466200	19466500	0.423976	0.30272	0.428483	0.298586	0.557125	0.180822	0	0.0927393
Chr1	19666400	19666600	0.375967	0.314247	0.372531	0.321936	0.359348	0.28166	0.013899	0.027139
Chr1	19728500	19728700	0.215901	0.170389	0.246569	0.157134	0.156459	0.33192	0.0643901	0.118948
Chr1	19729100	19729600	0.428069	0.35187	0.339327	0.275984	0.462356	0.250198	0.0821291	0.106466
Chr1	19741500	19742100	0.278272	0.137603	0.291726	0.227756	0.24863	0.284664	0.0490502	0.0661929
Chr1	19744200	19744400	0.0372978	0.0630876	0.0785198	0.184808	0.0456802	0.391176	0.0278784	0.0831054
Chr1	19768600	19768900	0.559704	0.507061	0.577867	0.408941	0.566351	0.302625	0.0318347	0.0241425
Chr1	19780300	19781100	0.297649	0.175133	0.319288	0.246439	0.341808	0.334415	0.0329536	0.0753417
Chr1	19809800	19810000	0.271091	0.165567	0.231249	0.218183	0.237399	0.471157	0.0274837	0.175455
Chr1	19861400	19861600	0.13646	0.136769	0.160219	0.128316	0.177001	0.361888	0.0147961	0.0417711
Chr1	19909100	19909300	0.0514639	0.0557955	0.0571737	0.106589	0.127516	0.16534	0.00623701	0.0351995
Chr1	19944400	19944600	0.236503	0.210325	0.270003	0.219312	0.277345	0.25854	0.108241	0.330988
Chr1	19993700	19993900	0.461944	0.317892	0.556954	0.57471	0.595864	0.432185	0.0901648	0.0324807
Chr1	19994300	19994800	0.613286	0.384188	0.624527	0.438923	0.537789	0.304379	0.063822	0.0920498
Chr1	20024200	20024400	0.262897	0.267876	0.215304	0.252799	0.305627	0.399858	0.0320368	0.0201144
Chr1	20154200	20154400	0.0444744	0.0441964	0.0357724	0.0754802	0.0843403	0.145493	0.00327932	0.0170655
Chr1	20167400	20167600	0.340027	0.283836	0.457544	0.419904	0.39698	0.475952	0.00231481	0.236474
Chr1	20172100	20172400	0.452161	0.346554	0.460355	0.456703	0.526698	0.356426	0.102871	0.0638072
Chr1	20205400	20205900	0.546469	0.405782	0.475555	0.402948	0.507683	0.30018	0.104629	0.0816618
Chr1	20206700	20206900	0.178619	0.189661	0.103492	0.22606	0.168372	0.650388	0.111144	0.0901343
Chr1	20208000	20208300	0.0649003	0.0438639	0.0766887	0.120294	0.085742	0.0936528	0.00927855	0.026146
Chr1	20226500	20226700	0.11848	0.0528784	0.0670245	0.0758478	0.0628043	0.16057	0.0155219	0.0155057
Chr1	20320400	20320600	0.119458	0.136356	0.0641102	0.20128	0.166645	0.476331	0.0629275	0.102589
Chr1	20362900	20363200	0.167704	0.227676	0.327959	0.334763	0.278675	0.592027	0.00641822	0.0183292
Chr1	20412300	20412600	0.0538659	0.0489678	0.0949207	0.123692	0.0307019	0.275094	0.0237078	0.0254176
Chr1	20508900	20509400	0.26023	0.181305	0.286997	0.31134	0.332049	0.189313	0.0481324	0.0524978
Chr1	20514200	20514600	0.544806	0.404517	0.423774	0.447668	0.434439	0.387478	0.0754725	0.0596249
Chr1	20520400	20520700	0.125713	0.0927775	0.0930055	0.122699	0.197803	0.235168	0.00726899	0.056745
Chr1	20525000	20525600	0.0379966	0.03682	0.0381449	0.0543382	0.0642321	0.16056	0.0244559	0.0264074
Chr1	20559600	20559900	0.469852	0.489117	0.527795	0.558782	0.594999	0.507631	0.0575038	0.146979
Chr1	20622400	20622800	0.232047	0.17005	0.315517	0.209795	0.270134	0.370414	0.0789557	0.0934328
Chr1	20624900	20625100	0.0811001	0.0829866	0.105502	0.111358	0.115558	0.387037	0.00969829	0.0124356
Chr1	20683300	20683900	0.199389	0.192676	0.225884	0.173574	0.237607	0.370566	0.0618912	0.128071
Chr1	20697000	20697300	0.157297	0.147927	0.233786	0.176712	0.17445	0.27203	0.0556844	0.0531177
Chr1	20699800	20700100	0.142347	0.152303	0.324341	0.262939	0.305154	0.542461	0.0130476	0.049899
Chr1	20704400	20704600	0.421176	0.305145	0.475057	0.364336	0.37624	0.329185	0.0396991	0.0754763
Chr1	20711000	20711200	0.0519668	0.0232454	0.0416446	0.0811953	0.0319595	0.190218	0.0513032	0.0855386
Chr1	20734100	20734300	0.210569	0.201367	0.273603	0.309183	0.216445	0.53368	0.16217	0.115255
Chr1	20820100	20820300	0.123107	0.0817828	0.132705	0.0814644	0.217564	0.123784	0.0102431	0.0157077
Chr1	20826900	20827200	0.157294	0.165178	0.199437	0.219789	0.186494	0.329721	0.055207	0.142258
Chr1	20979400	20979600	0.723773	0.615472	0.671943	0.665577	0.679653	0.780135	0.201929	0.292474
Chr1	20979900	20980100	0.117197	0.169278	0.121352	0.13885	0.0458333	0.174296	0.0997695	0.129487
Chr1	21105100	21105800	0.249323	0.152502	0.25996	0.240395	0.314662	0.226935	0.0180121	0.085326
Chr1	21120400	21120600	0.0514171	0.0898108	0.100522	0.0807292	0.0672645	0.243663	0.00935535	0.0138155
Chr1	21128600	21128900	0.513499	0.40963	0.554802	0.396784	0.551536	0.380265	0.0590802	0.081111
Chr1	21144700	21144900	0.15364	0.0338517	0.104832	0.120302	0.0576014	0.235903	0.00472411	0.0139456
Chr1	21210200	21210400	0.498424	0.3562	0.510134	0.429918	0.353951	0.32128	0.0332776	0.115006
Chr1	21228800	21229000	0.163063	0.15552	0.157632	0.20059	0.297291	0.535659	0.147343	0.095053
Chr1	21374500	21374700	0.0769376	0.01411	0.0682268	0.0652615	0.0800521	0.16191	0.00874644	0.0219708
Chr1	21392600	21393000	0.257012	0.233214	0.230589	0.0846808	0.165829	0.510048	0.0446759	0.0492971
Chr1	21428200	21428800	0.376726	0.207304	0.296743	0.297607	0.363883	0.261185	0.0168363	0.0859832
Chr1	21439000	21439200	0.0604351	0.0118687	0.0619297	0.082859	0.0348692	0.0930414	0.00606061	0.021892
Chr1	21470200	21470500	0.0630118	0.10484	0.0827528	0.0258387	0.104504	0.395423	0.00492424	0.0585465
Chr1	21472000	21472200	0.297421	0.220565	0.223704	0.239258	0.263096	0.478308	0.0294062	0.17177
Chr1	21507700	21508100	0.0974675	0.098449	0.168047	0.190761	0.137791	0.493927	0.014531	0.0377268
Chr1	21509800	21510100	0.0724806	0.0396199	0.0645726	0.112543	0.0719525	0.155662	0.0286752	0.0446616
Chr1	21525000	21525500	0.27261	0.118123	0.324777	0.223411	0.34301	0.393949	0.0400266	0.109338
Chr1	21526300	21526700	0.104167	0.115107	0.113789	0.0744127	0.143549	0.125848	0.04595	0.0790672
Chr1	21529300	21529800	0.271308	0.162166	0.25322	0.312122	0.351608	0.582178	0.00915457	0.0448999
Chr1	21602000	21602200	0.164075	0.118335	0.160451	0.129102	0.211554	0.452004	0.0286569	0.026291
Chr1	21615400	21615600	0.527729	0.417134	0.479868	0.365026	0.460949	0.225392	0.0368506	0.0268451
Chr1	21616000	21616200	0.359709	0.158355	0.384781	0.273169	0.409187	0.42982	0.0080475	0.126848
Chr1	21628700	21628900	0.11764	0.0707425	0.130157	0.196512	0.140944	0.412976	0.00739737	0.0282406
Chr1	21640500	21640800	0.143759	0.0534239	0.187526	0.204753	0.172564	0.475609	0.0066936	0.0684612
Chr1	21683300	21683500	0.124167	0.0706694	0.179094	0.124079	0.171781	0.347667	0.0358885	0.0537921
Chr1	21731800	21732200	0.0667907	0.0485095	0.0710428	0.0698213	0.0742666	0.273737	0.0390226	0.0409437
Chr1	21739100	21739600	0.53676	0.264621	0.445828	0.394845	0.392245	0.178688	0.0432083	0.0745144
Chr1	21744100	21744300	0.209087	0.141766	0.252503	0.20707	0.164071	0.336625	0.023383	0.0808024
Chr1	21823100	21823400	0.0871557	0.0243976	0.0941071	0.212651	0.210248	0.267189	0.0023976	0.050958
Chr1	21853700	21853900	0.484764	0.181306	0.388549	0.346442	0.430852	0.576852	0.0185305	0.0310297
Chr1	21918400	21918900	0.497218	0.380911	0.519581	0.40782	0.521801	0.229803	0.0569753	0.0596485
Chr1	21991200	21991400	0.178391	0.174432	0.184715	0.106969	0.124761	0.335138	0.0607194	0.0306713
Chr1	22106400	22106600	0.248847	0.151362	0.376868	0.393822	0.312598	0.313148	0.0344542	0.0396462
Chr1	22112100	22112300	0.207306	0.191812	0.233971	0.245948	0.165357	0.398732	0.0526361	0.102387
Chr1	22112900	22113300	0.171932	0.128373	0.176896	0.0955751	0.143242	0.138235	0.0180163	0.051103
Chr1	22163700	22164000	0.406469	0.26843	0.373303	0.151622	0.362758	0.331957	0.0766809	0.247519
Chr1	22166400	22166800	0.201638	0.159044	0.239049	0.310163	0.352935	0.364928	0.112738	0.298431
Chr1	22167100	22167300	0.384257	0.25579	0.304378	0.306816	0.363922	0.443497	0.122427	0.237383
Chr1	22167600	22167900	0.147282	0.165153	0.158239	0.197601	0.154204	0.424	0.0594814	0.160675
Chr1	22192000	22192500	0.527857	0.435319	0.599864	0.503545	0.56312	0.336255	0.0868413	0.0958697
Chr1	22224600	22224900	0.137143	0.176857	0.182051	0.135068	0.144731	0.549064	0.0919643	0.155325
Chr1	22261000	22261500	0.0711186	0.0609136	0.1079	0.138053	0.108519	0.392885	0.0363611	0.028948
Chr1	22443500	22443900	0.0718258	0.0588514	0.0891721	0.166875	0.075577	0.360001	0.00557108	0.00399762
Chr1	22447400	22447600	0.212909	0.160895	0.167213	0.220141	0.326935	0.569697	0.0167316	0.0260719
Chr1	22450400	22450600	0.402259	0.330102	0.520871	0.419523	0.484941	0.269723	0.0476191	0.063097
Chr1	22451700	22451900	0.566761	0.244306	0.513063	0.473099	0.675278	0.373589	0.00466201	0.18766
Chr1	22482700	22482900	0.211167	0.266985	0.238475	0.310466	0.304731	0.361909	0.0492451	0.0288715
Chr1	22542100	22542300	0.330542	0.199415	0.376494	0.285219	0.282717	0.557898	0.1033	0.0652471
Chr1	22563500	22563700	0.194479	0.221331	0.184892	0.269731	0.243484	0.37237	0.0346885	0.0486025
Chr1	22693900	22694300	0.0968532	0.076139	0.145104	0.126939	0.106015	0.435817	0.0912725	0.149163
Chr1	22699200	22699400	0.0866239	0.15876	0.0604851	0.111607	0.0902999	0.505491	0.114844	0.176041
Chr1	22743100	22743400	0.06937	0.0463265	0.0902789	0.110546	0.0377503	0.419978	0.0358196	0.0222023
Chr1	22751600	22751800	0.0192591	0.0184757	0.0180713	0.137825	0.0344003	0.292545	0.059096	0.0397316
Chr1	22828600	22829300	0.41344	0.221489	0.403163	0.390854	0.406297	0.280706	0.0659236	0.072566
Chr1	22872200	22872900	0.254201	0.150142	0.19144	0.212255	0.239347	0.276078	0.0630741	0.101729
Chr1	22887900	22888100	0.233265	0.117807	0.294901	0.271402	0.240062	0.457813	0.0553862	0.161787
Chr1	22889100	22889600	0.222101	0.0880195	0.180328	0.174413	0.155986	0.27171	0.00679887	0.0425992
Chr1	22890500	22890700	0.274463	0.244334	0.317793	0.314327	0.330834	0.484265	0.00367647	0.0789732
Chr1	22985300	22985600	0.0612687	0.0695918	0.0715232	0.0645237	0.0554509	0.264338	0.0103721	0.0193117
Chr1	22992700	22993400	0.553626	0.417172	0.539588	0.530286	0.482227	0.235347	0.029676	0.0817833
Chr1	23068200	23068500	0.0562482	0.0566564	0.0889396	0.162725	0.063352	0.363426	0.0363648	0.0304463
Chr1	23118300	23118500	0.0740787	0.027708	0.0834829	0.135539	0.0773254	0.349811	0.0829596	0.0730646
Chr1	23123000	23123300	0.0917318	0.0714724	0.132246	0.112285	0.083999	0.327595	0.0876281	0.155466
Chr1	23125100	23125700	0.522724	0.382361	0.586199	0.460375	0.565063	0.345837	0.0802829	0.132272
Chr1	23152500	23153300	0.198148	0.128803	0.169694	0.225145	0.162618	0.333887	0.0334809	0.06056
Chr1	23174200	23175000	0.515154	0.30374	0.472998	0.411777	0.40104	0.219512	0.035432	0.03746
Chr1	23190800	23191100	0.0839671	0.0487222	0.124364	0.169095	0.222546	0.254411	0.00338983	0.0380839
Chr1	23197400	23197900	0.145146	0.0550436	0.0926811	0.206584	0.162335	0.408597	0.00308347	0.0707447
Chr1	23214700	23214900	0.542999	0.370097	0.411331	0.338077	0.461266	0.262732	0.0461092	0.0357523
Chr1	23215200	23215400	0.403654	0.178444	0.401275	0.276893	0.474148	0.329434	0.0133334	0.0236115
Chr1	23247000	23247300	0.0757318	0.0562658	0.0925204	0.121194	0.0832633	0.399189	0.0206825	0.0524612
Chr1	23280400	23280600	0.0612889	0.0359402	0.111366	0.0916659	0.140582	0.403858	0.0270892	0.0465871
Chr1	23295700	23295900	0.138758	0.191592	0.349534	0.176023	0.225841	0.361942	0.119566	0.155739
Chr1	23297000	23297300	0.471728	0.346136	0.478388	0.303499	0.378807	0.569568	0.196557	0.163642
Chr1	23321500	23321700	0.101566	0.0436951	0.0919346	0.093923	0.111019	0.436332	0.00482456	0.109004
Chr1	23430900	23431100	0.0660408	0.0883443	0.0677893	0.239264	0.112181	0.482713	0.0773651	0.0155646
Chr1	23435800	23436000	0.0687858	0.0277248	0.0460479	0.0388888	0.0264226	0.184723	0.0552328	0.0738629
Chr1	23554300	23554500	0.488435	0.379277	0.438607	0.453978	0.436482	0.3254	0.025493	0.0943508
Chr1	23566400	23566600	0.172701	0.111649	0.218954	0.218775	0.235924	0.459968	0.0747046	0.0317503
Chr1	23613600	23614000	0.206153	0.129049	0.175581	0.1414	0.155478	0.239195	0.0153386	0.0422857
Chr1	23651600	23651800	0.149572	0.112484	0.138624	0.239826	0.282917	0.586366	0.00590278	0.023776
Chr1	23723600	23724000	0.142792	0.100414	0.102252	0.194222	0.179635	0.350525	0.00946644	0.0182842
Chr1	23875200	23875500	0.137793	0.10179	0.167815	0.140998	0.136948	0.386507	0.00494281	0.0347423
Chr1	23877000	23877200	0.549938	0.265028	0.489083	0.310745	0.451155	0.197763	0.00769231	0.0800325
Chr1	23907100	23907300	0.291394	0.139376	0.425007	0.411627	0.324523	0.547079	0.0320125	0.137243
Chr1	23925200	23925600	0.0606857	0.0564036	0.0948118	0.123596	0.0733949	0.230451	0.0324936	0.08177
Chr1	23939900	23940100	0.0367632	0.0296907	0.0397532	0.0798268	0.0431298	0.133565	0.0013369	0.0153849
Chr1	23940800	23941000	0.121642	0.0699872	0.165798	0.148835	0.0772773	0.346966	0.0726007	0.11391
Chr1	23946900	23947100	0.0785874	0.0341958	0.0790548	0.093245	0.119617	0.222462	0.0038961	0.0111361
Chr1	24027200	24027400	0.484528	0.235356	0.65757	0.484786	0.455848	0.360916	0.0354024	0.0508035
Chr1	24101400	24101700	0.0283313	0.025691	0.0161486	0.00456189	0.0201261	0.127564	0.0109031	0.0285528
Chr1	24126000	24126200	0.256769	0.185752	0.266409	0.300488	0.300402	0.332697	0.0788418	0.0627297
Chr1	24241400	24241600	0.101145	0.0905392	0.0553652	0.221701	0.118855	0.275261	0.0185762	0.0321686
Chr1	24291100	24291300	0.16252	0.12939	0.15475	0.157514	0.187085	0.206962	0.00862399	0.00575044
Chr1	24317400	24317600	0.197965	0.149296	0.299233	0.206226	0.290423	0.473478	0.0961556	0.0274272
Chr1	24337900	24338100	0.0826159	0.0690862	0.110972	0.121126	0.0913085	0.146469	0.030988	0.0443384
Chr1	24350700	24351000	0.0856547	0.0717452	0.153754	0.169101	0.0837034	0.304561	0.0618078	0.0383106
Chr1	24429000	24429200	0.0735011	0.0815684	0.07241	0.134229	0.0737075	0.176082	0.0355211	0.0781829
Chr1	24484400	24484700	0.269481	0.127887	0.214162	0.250013	0.240177	0.282268	0.00638012	0.0698907
Chr1	24532000	24532200	0.254124	0.220644	0.297902	0.221839	0.343445	0.45228	0.0660249	0.0612313
Chr1	24577200	24577400	0.55782	0.285819	0.510826	0.421971	0.582493	0.631616	0.0792906	0.108987
Chr1	24645500	24646000	0.460761	0.430794	0.503272	0.394261	0.487793	0.277753	0.0232923	0.0553243
Chr1	24705000	24705200	0.236989	0.113655	0.231755	0.200369	0.262241	0.237474	0.0439058	0.0933437
Chr1	24705800	24706000	0.195331	0.126884	0.281224	0.186779	0.170303	0.334908	0.0869493	0.0334765
Chr1	24718400	24718800	0.387906	0.209109	0.427943	0.349035	0.476927	0.319007	0.0578077	0.0659386
Chr1	24741100	24741300	0.585504	0.447876	0.53371	0.40969	0.625274	0.513509	0.272913	0.195068
Chr1	24745000	24745400	0.114487	0.102219	0.166699	0.203173	0.17396	0.356769	0.010032	0.0320104
Chr1	24772200	24772600	0.209357	0.163588	0.167316	0.201044	0.29356	0.159029	0.00671304	0.0291056
Chr1	24776600	24776900	0.115528	0.0694437	0.150513	0.244757	0.140798	0.36805	0.0040747	0.00500192
Chr1	24831600	24831900	0.325217	0.292547	0.431298	0.423541	0.352131	0.431791	0.164654	0.0869076
Chr1	24918400	24918600	0.381076	0.266664	0.295525	0.24661	0.367647	0.187235	0.00861529	0.0394443
Chr1	24948100	24948400	0.129495	0.142236	0.197374	0.264999	0.158265	0.575047	0.0306825	0.0424502
Chr1	25033600	25033900	0.0393464	0.0622782	0.130213	0.140137	0.145205	0.440553	0.201354	0.0888871
Chr1	25057100	25057300	0.116437	0.0442506	0.0503747	0.0836606	0.0663606	0.250374	0.0692353	0.0468684
Chr1	25180100	25180300	0.228914	0.251142	0.281617	0.321491	0.388608	0.395641	0.154377	0.0947287
Chr1	25266000	25266300	0.0690431	0.119639	0.0745437	0.135723	0.0893489	0.251988	0.0314477	0.0277606
Chr1	25343300	25343600	0.174539	0.104774	0.162465	0.0925222	0.131353	0.218202	0.04912	0.0609827
Chr1	25358100	25358400	0.414021	0.288524	0.489169	0.329655	0.398968	0.306692	0.0319816	0.0753068
Chr1	25400500	25400700	0.207781	0.109221	0.187944	0.127699	0.138176	0.410786	0.0766641	0.0552542
Chr1	25401300	25401500	0.139742	0.179742	0.20365	0.322435	0.266875	0.42688	0.209013	0.160479
Chr1	25594600	25594900	0.103513	0.0502419	0.115953	0.0930116	0.0957504	0.205913	0.00638298	0.041964
Chr1	25609900	25610100	0.287249	0.32878	0.2368	0.418742	0.306659	0.424338	0.049187	0.0608206
Chr1	25613400	25613700	0.246699	0.1839	0.246147	0.285126	0.226527	0.290858	0.0515222	0.0483245
Chr1	25641400	25641800	0.364795	0.305269	0.447255	0.3006	0.348289	0.470057	0.155671	0.173686
Chr1	25660000	25660300	0.198699	0.169833	0.228699	0.129988	0.236507	0.467609	0.117896	0.0787739
Chr1	25696500	25696700	0.13835	0.0810329	0.146075	0.160168	0.12805	0.359453	0.199218	0.0728313
Chr1	25730100	25730300	0.0484554	0.138268	0.0806445	0.178152	0.102278	0.381739	0.021914	0.0637111
Chr1	25751800	25752000	0.0766267	0.0612596	0.0734485	0.149862	0.0989518	0.228623	0.0753246	0.0653257
Chr1	25779700	25780300	0.556049	0.335059	0.50232	0.448943	0.463762	0.388004	0.0683361	0.08157
Chr1	25896500	25896700	0.202374	0.158378	0.262832	0.192346	0.272359	0.258795	0	0.105486
Chr1	25928400	25928700	0.204556	0.166933	0.156227	0.128688	0.231955	0.184339	0.0512063	0.0828044
Chr1	25962500	25962800	0.495226	0.260819	0.455634	0.39331	0.516669	0.42337	0.0473187	0.0622132
Chr1	25973800	25974000	0.0736075	0.0746527	0.148589	0.142039	0.176939	0.538558	0.104692	0.0680079
Chr1	25975900	25976100	0.027486	0.0321925	0.0940751	0.0689772	0.0492326	0.207534	0.00193424	0.0122733
Chr1	26084000	26084200	0.173282	0.121633	0.11644	0.139692	0.148494	0.491626	0.00702381	0.0498788
Chr1	26140000	26140200	0.0888651	0.0451094	0.085385	0.224293	0.219709	0.390117	0.0146529	0.00723938
Chr1	26170000	26170200	0.517519	0.291957	0.601285	0.350134	0.483892	0.274608	0.0220588	0.0475533
Chr1	26196300	26197400	0.128483	0.0884359	0.150161	0.155628	0.189937	0.417975	0.0150523	0.0441895
Chr1	26307000	26307500	0.392084	0.284072	0.381205	0.385972	0.49543	0.406652	0.0281837	0.0724063
Chr1	26366600	26366800	0.0515445	0.080202	0.121776	0.112413	0.118736	0.218417	0.0456304	0.0802884
Chr1	26371400	26371700	0.0512972	0.0601935	0.0842861	0.096957	0.0344276	0.312211	0.102345	0.126711
Chr1	26374400	26375100	0.146282	0.112024	0.208705	0.136009	0.173445	0.231352	0.0448832	0.0594859
Chr1	26510700	26511300	0.432247	0.349732	0.489943	0.395382	0.434285	0.28362	0.0671693	0.047708
Chr1	26551600	26552200	0.466371	0.310913	0.556495	0.369834	0.464096	0.391899	0.0219802	0.089767
Chr1	26779300	26779700	0.329167	0.185825	0.338543	0.209835	0.30988	0.313553	0.0243981	0.082184
Chr1	26880200	26880800	0.378756	0.223636	0.418771	0.42211	0.401039	0.311951	0.0536214	0.0717728
Chr1	26881100	26881500	0.309903	0.175572	0.3397	0.217375	0.348265	0.24665	0.0676761	0.10088
Chr1	27117800	27118100	0.0771927	0.072057	0.0735516	0.0800868	0.0834104	0.239319	0.0168039	0.0231469
Chr1	27240700	27241200	0.581311	0.420125	0.618729	0.507627	0.613566	0.282369	0.0551849	0.067989
Chr1	27440600	27440800	0.182527	0.160265	0.164128	0.0970968	0.22042	0.330115	0.0518322	0.088939
Chr1	27597400	27597600	0.0852395	0.0897138	0.0870855	0.173074	0.161749	0.493307	0.0077381	0.0231481
Chr1	27710500	27710700	0.374815	0.16975	0.335019	0.351343	0.389002	0.514415	0.127286	0.0520017
Chr1	27859700	27859900	0.370733	0.15931	0.321312	0.374241	0.270514	0.42718	0.0995218	0.0593027
Chr1	27860700	27860900	0.501235	0.438478	0.589002	0.347916	0.536459	0.477367	0.024112	0.0431708
Chr1	27972200	27972900	0.323922	0.216726	0.314773	0.275476	0.233424	0.293556	0.063515	0.0510376
Chr1	28051400	28051700	0.138462	0.142283	0.171369	0.269582	0.196073	0.449301	0.0145478	0.0226414
Chr1	28105500	28105800	0.0861741	0.137625	0.142738	0.147553	0.226874	0.50452	0.0136241	0.0158342
Chr1	28162000	28162300	0.572666	0.324685	0.63554	0.462017	0.466906	0.303993	0.0614871	0.0317257
Chr1	28188800	28189100	0.0787686	0.0260215	0.0333391	0.0589485	0.0787312	0.400672	0.00367431	0.0441466
Chr1	28259100	28259400	0.0654829	0.0164663	0.027636	0.0903743	0.0315385	0.206243	0.00299674	0.0102557
Chr1	28293300	28293600	0.0813869	0.100125	0.192635	0.12399	0.0865151	0.403376	0.0356088	0.00860123
Chr1	28312000	28312200	0.296187	0.28813	0.242398	0.194627	0.248613	0.224266	0.0131882	0.0239454
Chr1	28312500	28312700	0.433745	0.216403	0.347061	0.383119	0.337345	0.50049	0.00919541	0.201897
Chr1	28397500	28397700	0.488647	0.327859	0.412375	0.398668	0.461402	0.379983	0.0417531	0.130272
Chr1	28398600	28398900	0.216859	0.182321	0.259203	0.259259	0.245702	0.390619	0.117819	0.205761
Chr1	28592900	28593100	0.247159	0.113514	0.244031	0.201583	0.237582	0.364865	0.00778388	0.00786596
Chr1	28702900	28703400	0.142667	0.0835598	0.0571191	0.0927112	0.0514929	0.437797	0.0181925	0.0860701
Chr1	28703700	28703900	0.160525	0.0519675	0.0600354	0.18667	0.0639675	0.289019	0.0256045	0.0475493
Chr1	28731800	28732100	0.100648	0.122509	0.222419	0.243948	0.102725	0.538108	0.00373775	0.0047269
Chr1	28749900	28750300	0.392367	0.284053	0.353974	0.389129	0.36457	0.306656	0.0421693	0.132099
Chr1	28785600	28785900	0.236068	0.209035	0.189687	0.295357	0.172562	0.216033	0	0.0883592
Chr1	28815600	28815900	0.307435	0.174829	0.24609	0.115214	0.226732	0.213127	0.00769612	0.00652557
Chr1	28891400	28891900	0.607809	0.442202	0.576347	0.466158	0.518204	0.364016	0.0326596	0.0620455
Chr1	28912700	28913100	0.108762	0.0825764	0.163284	0.103156	0.125052	0.263791	0.0333124	0.0347308
Chr1	28936100	28936300	0.138145	0.202084	0.304504	0.287063	0.363457	0.431496	0.109549	0.149714
Chr1	28994500	28994700	0.291375	0.20713	0.146392	0.333672	0.507247	0.471493	0.0487731	0.124231
Chr1	29078400	29078800	0.332139	0.190945	0.304437	0.312958	0.403391	0.353719	0.0437468	0.0808498
Chr1	29125400	29125900	0.341811	0.1999	0.373486	0.345563	0.333399	0.396208	0.0826572	0.121769
Chr1	29244100	29244700	0.487604	0.372746	0.492463	0.358504	0.489379	0.374616	0.0703966	0.0814692
Chr1	29250100	29250300	0.0282686	0.0217976	0.148925	0.121836	0.0471424	0.225643	0.0126733	0.0037037
Chr1	29263300	29263700	0.116658	0.132942	0.116836	0.0891881	0.0904075	0.271909	0.0212525	0.0283754
Chr1	29319200	29320200	0.412337	0.33983	0.411838	0.338536	0.443305	0.250552	0.0261257	0.0801795
Chr1	29380600	29380800	0.0350565	0.0463723	0.0985407	0.151587	0.0548528	0.435859	0.130612	0.0585215
Chr1	29496500	29496700	0.364985	0.313201	0.420068	0.440172	0.353771	0.535017	0.200796	0.150716
Chr1	29611600	29611800	0.464369	0.375438	0.462983	0.354727	0.513742	0.445585	0.0922445	0.0820132
Chr1	29612200	29612400	0.401809	0.418767	0.428083	0.472204	0.426935	0.443395	0.178163	0.230003
Chr1	29983300	29983500	0.282365	0.200055	0.294563	0.191593	0.268183	0.480109	0.0196403	0.146669
Chr1	29984200	29984400	0.641821	0.503577	0.53297	0.447047	0.593899	0.561374	0.239312	0.334172
Chr1	30200000	30200400	0.189737	0.171518	0.266318	0.156384	0.279876	0.434262	0.0188789	0.0110435
Chr1	30252300	30252500	0.42443	0.385231	0.637587	0.379626	0.27451	0.187722	0.0411765	0.0932946
Chr1	30254700	30254900	0.439382	0.483912	0.549836	0.440532	0.45084	0.312169	0	0.0488368
Chr1	30427300	30427600	0.0825141	0.0918364	0.0740477	0.133865	0.0969734	0.178468	0.0425042	0.0462332
Chr2	98500	98700	0.0218715	0.0305446	0.041992	0.0471754	0.0435938	0.190177	0.0181846	0.0463635
Chr2	122100	122300	0.229052	0.294036	0.13694	0.378107	0.272343	0.440855	0.00166113	0.0164175
Chr2	163300	163500	0.111664	0.0922637	0.0895491	0.141476	0.112523	0.304059	0.0640646	0.0357359
Chr2	178400	178700	0.0569925	0.0399716	0.190303	0.0423059	0.0610934	0.418874	0.059928	0.0563217
Chr2	179700	180000	0.0742741	0.0300449	0.0506561	0.0728596	0.0771197	0.4028	0.0198636	0.0139877
Chr2	205200	205500	0.0531715	0.0741416	0.059443	0.0952918	0.0754331	0.206193	0.0110797	0.0236846
Chr2	241600	242000	0.245533	0.162756	0.262867	0.225866	0.241696	0.18547	0.0137311	0.0391622
Chr2	254300	254500	0.390679	0.326028	0.367886	0.333431	0.418066	0.576009	0.00928874	0.0157733
Chr2	268500	268700	0.274827	0.141633	0.243477	0.221491	0.278543	0.426532	0.0224686	0.0416405
Chr2	275100	275300	0.365181	0.255413	0.286201	0.376582	0.369665	0.353431	0.0364497	0.062611
Chr2	275800	276000	0.212313	0.145269	0.376807	0.282224	0.331159	0.377545	0.130974	0.0124151
Chr2	276800	277100	0.246845	0.180582	0.255659	0.246583	0.220565	0.314151	0.0295942	0.0385985
Chr2	305800	306100	0.207603	0.0934144	0.275439	0.249495	0.227027	0.441087	0.00511823	0.0461686
Chr2	314600	314900	0.18702	0.149437	0.178542	0.21121	0.221171	0.34516	0.0518784	0.0868341
Chr2	362500	362700	0.123843	0.0964363	0.103571	0.139453	0.106287	0.408291	0.0337491	0.0202147
Chr2	368400	368600	0.159904	0.0760313	0.175289	0.167452	0.132588	0.415252	0.095664	0.0940141
Chr2	379400	379600	0.0863423	0.0761638	0.103165	0.183463	0.0886199	0.500619	0.105114	0.0290133
Chr2	395300	396200	0.500763	0.381142	0.607222	0.424532	0.470059	0.256621	0.0258503	0.0386989
Chr2	400100	400300	0.2531	0.216617	0.318283	0.341584	0.321807	0.390741	0.0359708	0.0519092
Chr2	407300	407600	0.174377	0.156696	0.148202	0.173365	0.240563	0.339569	0.00389983	0.0174859
Chr2	416300	416500	0.388044	0.267141	0.367657	0.247509	0.354364	0.572915	0.0238316	0.111731
Chr2	423000	423200	0.0847754	0.117532	0.0731798	0.106508	0.115722	0.355102	0.0239499	0.00979069
Chr2	424700	424900	0.128873	0.0451835	0.082532	0.104527	0.10532	0.311757	0.00729622	0.0148243
Chr2	440400	440600	0.262168	0.133019	0.226259	0.196368	0.260512	0.522321	0.0681201	0.0377723
Chr2	465900	466100	0.0778442	0.0294473	0.0521837	0.186588	0.149837	0.339529	0.0491297	0.0735991
Chr2	500600	501400	0.515938	0.390005	0.478211	0.417073	0.530224	0.224845	0.0223683	0.0622394
Chr2	501800	502000	0.571103	0.535819	0.490002	0.360754	0.414095	0.172503	0	0.0141905
Chr2	530000	530300	0.103276	0.0812654	0.10042	0.148243	0.137711	0.384839	0.036584	0.0558814
Chr2	543000	543500	0.560727	0.364873	0.542839	0.412619	0.544326	0.213259	0.0347443	0.00891233
Chr2	543900	544100	0.463927	0.202245	0.608734	0.25895	0.424113	0.320682	0.0107843	0.00793651
Chr2	560200	560400	0.307035	0.210896	0.255383	0.319204	0.319507	0.419666	0.0296583	0.0415937
Chr2	626000	626500	0.112786	0.0918152	0.0864905	0.131308	0.131991	0.186254	0.0199853	0.0495298
Chr2	631000	631300	0.161544	0.138681	0.199636	0.327709	0.190661	0.566278	0.0167656	0.014697
Chr2	637100	637300	0.114901	0.0884054	0.120201	0.174689	0.108433	0.258099	0.00360276	0.019789
Chr2	716000	716400	0.34846	0.263758	0.447421	0.250655	0.345285	0.151965	0.0139808	0.0354268
Chr2	754400	754600	0.36662	0.348853	0.406689	0.238611	0.396186	0.382732	0.0254164	0.050904
Chr2	762400	762600	0.244157	0.185447	0.232792	0.199968	0.307537	0.397631	0.0487948	0.0538562
Chr2	794400	795200	0.418096	0.284002	0.421931	0.272167	0.361314	0.228394	0.0260327	0.0585497
Chr2	856900	857100	0.00626167	0.0100122	0.0230388	0.0695075	0.0423125	0.198408	0.00619658	0.00579976
Chr2	871400	871600	0.434881	0.438834	0.448765	0.342297	0.381444	0.370139	0.119165	0.225983
Chr2	891100	891300	0.0592983	0.0930996	0.0448732	0.07473	0.103323	0.21983	0.0206349	0.0114583
Chr2	904400	905400	0.0974312	0.0919109	0.132923	0.16807	0.144598	0.322163	0.0315574	0.0610752
Chr2	909800	910000	0.442011	0.370483	0.410449	0.43467	0.42026	0.318403	0.144366	0.115398
Chr2	919500	920000	0.202346	0.18522	0.217271	0.201569	0.212171	0.314294	0.0614565	0.0692674
Chr2	932400	932600	0.393896	0.156308	0.290504	0.141414	0.392127	0.28336	0.112657	0.0874395
Chr2	933600	933800	0.159462	0.102753	0.217643	0.227536	0.226508	0.28562	0.0958015	0.103987
Chr2	980100	980600	0.554177	0.459878	0.499761	0.413743	0.491781	0.197832	0.0351898	0.0387689
Chr2	984000	984200	0.0492896	0.078993	0.0705656	0.183131	0.146847	0.528623	0.0131781	0.0223133
Chr2	1012600	1012900	0.164694	0.120135	0.149418	0.151375	0.145102	0.235951	0.108887	0.0965364
Chr2	1017600	1017800	0.248295	0.175289	0.330594	0.244352	0.356813	0.596236	0.0242888	0.0785625
Chr2	1037800	1038900	0.379327	0.212913	0.379714	0.266204	0.35621	0.308246	0.0502759	0.0597775
Chr2	1050200	1050400	0.1363	0.236201	0.228086	0.0914021	0.213159	0.429474	0.0109954	0.0575698
Chr2	1076000	1076400	0.398856	0.296798	0.356132	0.349057	0.455837	0.267849	0.00629952	0.047828
Chr2	1078800	1079000	0.24266	0.16142	0.270445	0.372704	0.283301	0.341475	0.110701	0.0655209
Chr2	1085200	1085400	0.155552	0.154667	0.131214	0.173632	0.0987226	0.329978	0.08749	0.158119
Chr2	1123800	1124100	0.112241	0.0563763	0.0841625	0.113803	0.170091	0.407638	0.0501263	0.0486564
Chr2	1126400	1126600	0.158228	0.127696	0.13647	0.102685	0.187233	0.119316	0.0619227	0.0699222
Chr2	1134100	1134300	0.0372839	0.0486683	0.0409752	0.177696	0.0737488	0.257573	0.0422758	0.047468
Chr2	1194100	1194500	0.376293	0.22731	0.342327	0.247643	0.341121	0.19252	0.00787793	0.0207496
Chr2	1263800	1264000	0.260238	0.21489	0.257563	0.264834	0.267252	0.543347	0.0236399	0.079024
Chr2	1264800	1265100	0.209458	0.10267	0.129008	0.0964637	0.172514	0.167933	0.0460913	0.0532159
Chr2	1278000	1278200	0.0810833	0.108552	0.0450602	0.0783111	0.0644414	0.121195	0.00957665	0.0191043
Chr2	1383600	1383900	0.46215	0.316212	0.465567	0.428958	0.518532	0.380222	0.0914369	0.0421918
Chr2	1414100	1414300	0.0882112	0.0281708	0.159998	0.0417962	0.0891527	0.182197	0.00941567	0.00927895
Chr2	1461200	1461400	0.17856	0.158616	0.178682	0.141391	0.212458	0.240217	0.0885337	0.076733
Chr2	1513200	1513400	0.124249	0.0957816	0.157161	0.132564	0.147912	0.297362	0.0549435	0.116718
Chr2	1572500	1572900	0.22594	0.130891	0.324738	0.22016	0.205497	0.256171	0.0912478	0.0790245
Chr2	1584900	1585300	0.0827808	0.0615348	0.0553585	0.105105	0.0530568	0.208464	0.0137549	0.0611619
Chr2	1587400	1587600	0.389761	0.323601	0.452988	0.441745	0.359991	0.285557	0.06058	0.042216
Chr2	1629500	1630100	0.342533	0.34771	0.27382	0.28533	0.344494	0.271316	0.0979978	0.142515
Chr2	1678600	1678900	0.206187	0.130731	0.276691	0.209528	0.232559	0.246295	0.0236069	0.004
Chr2	1681300	1681500	0.266056	0.20325	0.289089	0.236322	0.265507	0.148288	0.00469244	0.0377363
Chr2	1684900	1685100	0.10603	0.116239	0.15983	0.144454	0.156839	0.313871	0.0362994	0.0759673
Chr2	1691100	1691300	0.335848	0.251672	0.426182	0.179736	0.306414	0.243214	0.0248852	0.0361659
Chr2	1691600	1692200	0.209454	0.130844	0.193536	0.127352	0.189284	0.153769	0.0396092	0.0459461
Chr2	1731500	1731800	0.262828	0.18574	0.257003	0.23117	0.242535	0.344839	0.116993	0.139618
Chr2	1740700	1740900	0.0850611	0.184425	0.108403	0.160509	0.12284	0.413941	0.0375629	0.125745
Chr2	1821600	1821900	0.0588838	0.0487677	0.0729903	0.0658954	0.0781237	0.185506	0.0186107	0.0378782
Chr2	1823000	1823200	0.132111	0.109805	0.158051	0.151459	0.15677	0.382342	0	0.01
Chr2	1890000	1890300	0.252518	0.262903	0.376	0.259971	0.280647	0.379886	0.116876	0.134067
Chr2	1963100	1963300	0.185355	0.0398152	0.135357	0.0759559	0.145825	0.196117	0.0112993	0.0390986
Chr2	1982800	1983100	0.258666	0.191608	0.270982	0.206685	0.230807	0.263184	0.0629431	0.0568467
Chr2	2034100	2034300	0.100814	0.062756	0.0901673	0.182659	0.122405	0.385315	0.00449422	0.0205258
Chr2	2058800	2059200	0.220541	0.130935	0.245915	0.209203	0.256454	0.263069	0.0878708	0.204693
Chr2	2066500	2066700	0.111621	0.0465695	0.161923	0.103176	0.128237	0.199901	0.00557946	0.0102778
Chr2	2178600	2178800	0.275737	0.254025	0.244418	0.191339	0.193659	0.276877	0.0265036	0.0142092
Chr2	2217200	2217600	0.0633129	0.0645528	0.10039	0.0913502	0.0781004	0.350884	0.0314625	0.0488022
Chr2	2232200	2232400	0.309253	0.261035	0.361025	0.224951	0.196888	0.400475	0.116364	0.0395496
Chr2	2240700	2240900	0.543062	0.405724	0.429453	0.341791	0.471712	0.156471	0.00204082	0.0105152
Chr2	2260700	2261000	0.241803	0.178499	0.270121	0.221584	0.281446	0.235756	0.0424289	0.0674984
Chr2	2284200	2284500	0.282325	0.258448	0.285203	0.298714	0.334795	0.315239	0.0347679	0.0477382
Chr2	2319900	2320100	0.0907343	0.125597	0.0726892	0.162311	0.0949586	0.269588	0.0299429	0.0480634
Chr2	2321700	2321900	0.116485	0.173108	0.174869	0.15855	0.253904	0.308923	0.00974472	0.0176157
Chr2	2362700	2362900	0.0666996	0.139328	0.05158	0.113562	0.0774089	0.207657	0.0192773	0.0313514
Chr2	2591600	2592000	0.131123	0.0912925	0.114716	0.0721895	0.147644	0.223484	0.0119962	0.0634597
Chr2	2655000	2655200	0.196928	0.218559	0.312775	0.221177	0.287679	0.300938	0.051251	0.0680226
Chr2	2735000	2735200	0.135795	0.179224	0.292374	0.20607	0.194873	0.183718	0.0272347	0.0561676
Chr2	2844300	2844700	0.0740014	0.0632534	0.0890398	0.0779674	0.0515764	0.216056	0.0673269	0.100725
Chr2	2923500	2924000	0.14376	0.216273	0.141832	0.205261	0.212346	0.232916	0.00544627	0.0136816
Chr2	2980100	2980400	0.178306	0.111114	0.179224	0.1307	0.161535	0.177662	0.0204639	0.0140536
Chr2	4007200	4007500	0.116374	0.068143	0.144954	0.136204	0.177497	0.334656	0.0238248	0.0780103
Chr2	4306000	4306300	0.483074	0.30888	0.439829	0.407505	0.50465	0.355818	0.0408079	0.102545
Chr2	4472100	4472300	0.513064	0.333418	0.52592	0.566105	0.494717	0.139548	0.00300207	0.0312356
Chr2	4473500	4473800	0.171919	0.242684	0.204462	0.111038	0.061231	0.127574	0.0212045	0.0285059
Chr2	4476100	4476600	0.318386	0.247884	0.349491	0.254469	0.27287	0.346017	0.0602024	0.0540359
Chr2	4871000	4871200	0.0835051	0.0721029	0.0381358	0.0294779	0.0457817	0.279342	0.0259304	0.0163973
Chr2	5037700	5038100	0.259123	0.174972	0.261406	0.147878	0.173069	0.17441	0.0285467	0.0645241
Chr2	5049500	5049700	0.32716	0.197454	0.268997	0.301792	0.292798	0.42731	0.117403	0.141201
Chr2	5052300	5052500	0.424559	0.239439	0.256578	0.271234	0.210273	0.406379	0.156645	0.107889
Chr2	5056700	5057000	0.141555	0.139324	0.179301	0.0981846	0.117701	0.174128	0.0545142	0.0220391
Chr2	5057900	5058200	0.181253	0.176587	0.216263	0.132024	0.212202	0.154961	0.0638133	0.0371078
Chr2	5215200	5215400	0.0661699	0.0156197	0.0320085	0.0173641	0.0330419	0.173762	0.0204847	0.0093583
Chr2	5465000	5465300	0.156391	0.150053	0.108235	0.141086	0.203299	0.169496	0.00972222	0.0269001
Chr2	5557700	5557900	0.184417	0.103369	0.180952	0.176174	0.185361	0.213757	0.079386	0.118042
Chr2	5586100	5586300	0.0483139	0.0332717	0.0508339	0.086902	0.0694803	0.336457	0.0258397	0.0898644
Chr2	5588400	5588700	0.253817	0.094462	0.201045	0.152173	0.160185	0.256625	0.0333151	0.0748851
Chr2	5589100	5589300	0.357385	0.156425	0.151256	0.205655	0.272003	0.49141	0.0479487	0.0586026
Chr2	5598400	5598800	0.0779482	0.07096	0.0749347	0.119371	0.0631231	0.253118	0.0445642	0.0379732
Chr2	5606000	5606400	0.117906	0.0834736	0.152448	0.156189	0.102508	0.460928	0.139373	0.117572
Chr2	5636800	5637000	0.0269162	0.0179851	0.0125676	0.0169535	0.0416333	0.178157	0.0265904	0.039659
Chr2	5709300	5709500	0.131145	0.152707	0.0933111	0.184485	0.0641273	0.384009	0.0644741	0.135339
Chr2	5774800	5775500	0.099342	0.0904957	0.220845	0.144551	0.135546	0.23896	0.0543454	0.0746384
Chr2	5807800	5808100	0.395071	0.400432	0.324278	0.33992	0.286757	0.186797	0.0348091	0.0484639
Chr2	5841100	5841300	0.141831	0.129113	0.0553331	0.12312	0.228952	0.270613	0.0031746	0.078055
Chr2	5871600	5871900	0.262793	0.185558	0.241337	0.130068	0.301267	0.172075	0.0130952	0.0466244
Chr2	5917800	5918000	0.037592	0.0334046	0.116788	0.0934452	0.0687076	0.342884	0.038067	0.0121089
Chr2	5934300	5934600	0.205802	0.194187	0.26936	0.131251	0.181935	0.176622	0.00797576	0.0291374
Chr2	5960300	5960500	0.39097	0.455358	0.445435	0.370811	0.424291	0.575995	0.183882	0.20442
Chr2	6004700	6005000	0.0726	0.0512935	0.0636015	0.0803924	0.101583	0.323545	0.0344284	0.037049
Chr2	6036400	6036700	0.0642458	0.0570627	0.0902691	0.0831788	0.0485716	0.299856	0.0256392	0.0431018
Chr2	6044000	6044400	0.209263	0.229005	0.288959	0.193762	0.24085	0.451136	0.113827	0.265663
Chr2	6179400	6179600	0	0.00178891	0.00678295	0.00232558	0.00232558	0.00765504	0.00878213	0.0033393
Chr2	6207000	6207200	0.418743	0.173742	0.600775	0.28493	0.367512	0.152804	0.0103175	0.114436
Chr2	6215700	6215900	0.00747448	0.0710375	0.0149354	0.0427116	0.0400217	0.228053	0.00667739	0.0172247
Chr2	6250500	6250700	0.0623806	0.060116	0.0727265	0.161281	0.157616	0.330461	0.112006	0.0289844
Chr2	6288300	6288800	0.53782	0.287956	0.441161	0.367639	0.419219	0.274831	0.00626488	0.0853191
Chr2	6405700	6406000	0.14604	0.102099	0.143543	0.210948	0.113925	0.258471	0.0240197	0.0500185
Chr2	6468600	6468800	0.0510503	0.0466362	0.183909	0.125217	0.128513	0.287716	0.0183201	0.0620072
Chr2	6493900	6494200	0.0287229	0.0255104	0.0225574	0.0580914	0.0641482	0.205337	0.00338575	0.0172975
Chr2	6522800	6523200	0.20428	0.076192	0.159384	0.163627	0.127464	0.304885	0.0442285	0.0081153
Chr2	6663300	6663500	0.523598	0.3811	0.452105	0.344586	0.523499	0.132198	0.0445611	0.0633416
Chr2	6665900	6666300	0.0653222	0.0391631	0.0594191	0.157001	0.0602377	0.257328	0.0244927	0.0241937
Chr2	6668100	6668300	0.050591	0.11093	0.0615267	0.157856	0.110681	0.306397	0.0269852	0.0104604
Chr2	6707500	6707900	0.0938054	0.0687672	0.104355	0.0485302	0.0517404	0.0501433	0.0161948	0.026035
Chr2	6714800	6715000	0.410424	0.288433	0.448906	0.31817	0.473019	0.314964	0.0872214	0.0546469
Chr2	6733000	6733400	0.16866	0.180593	0.286995	0.212498	0.192379	0.25517	0.014797	0.0744944
Chr2	6740100	6740300	0.658326	0.523653	0.697173	0.533287	0.631661	0.393299	0.0936976	0.107435
Chr2	6790600	6790800	0.141708	0.0965578	0.183807	0.172906	0.148187	0.397963	0.0659509	0.0259241
Chr2	6803600	6803800	0.573583	0.321776	0.487515	0.345722	0.529312	0.271817	0.0209455	0.0376958
Chr2	6804100	6804300	0.530557	0.21585	0.514366	0.313746	0.406765	0.329762	0.00537635	0.00980394
Chr2	6813000	6813200	0.0520078	0.0317197	0.0703293	0.041676	0.0671406	0.334526	0.0183233	0.0369875
Chr2	6837300	6837600	0.061422	0.0397147	0.0682266	0.082283	0.0834164	0.337221	0.0998096	0.150008
Chr2	6892200	6893200	0.152995	0.12885	0.160376	0.173804	0.191753	0.326982	0.0610046	0.0990069
Chr2	6897400	6897600	0.159061	0.0876683	0.102705	0.0633762	0.11814	0.0627873	0.0156889	0.0207595
Chr2	6922500	6923000	0.23512	0.147262	0.187406	0.20214	0.16811	0.303929	0.0500329	0.0837793
Chr2	6926400	6926700	0.0745265	0.0579727	0.0890334	0.147227	0.0639883	0.156253	0.00561157	0.0143142
Chr2	6946100	6946600	0.335153	0.185685	0.30518	0.221732	0.316779	0.368861	0.0397131	0.0558961
Chr2	6948700	6948900	0.0480844	0.0447708	0.0852585	0.175406	0.0571652	0.213355	0.0187807	0.0326252
Chr2	6990100	6990400	0.160639	0.12372	0.116982	0.155456	0.115278	0.336063	0.0542625	0.0835853
Chr2	6992200	6992600	0.157382	0.0759056	0.274862	0.200024	0.206385	0.21088	0.0435427	0.0940667
Chr2	7056700	7056900	0.351957	0.276229	0.323184	0.367869	0.31459	0.305937	0.00366629	0.0333896
Chr2	7148100	7148500	0.104821	0.0528675	0.0910875	0.0883843	0.071766	0.293473	0.0201786	0.0613169
Chr2	7153600	7153900	0.511948	0.485156	0.59269	0.553346	0.634791	0.344095	0.10122	0.116682
Chr2	7155500	7155800	0.336648	0.285389	0.26946	0.279872	0.353151	0.281274	0.0286623	0.0390231
Chr2	7161200	7161400	0.270007	0.188373	0.353544	0.194172	0.260156	0.412516	0.0987043	0.0319663
Chr2	7224100	7224300	0.0455856	0.0907729	0.0783585	0.135354	0.0838264	0.421957	0.0339896	0.0560672
Chr2	7230500	7230700	0.063311	0.0795934	0.0626071	0.129887	0.0468611	0.263895	0.167034	0.168297
Chr2	7238600	7238800	0.16121	0.10256	0.116934	0.179879	0.130987	0.44738	0.165913	0.0407547
Chr2	7246600	7246800	0.0511386	0.0295848	0.0777752	0.13557	0.0370134	0.138916	0.0189362	0.0203436
Chr2	7295400	7295600	0.114354	0.0437665	0.18515	0.109083	0.0536848	0.301865	0.0182835	0.0394841
Chr2	7340300	7340500	0.3723	0.366283	0.516375	0.385442	0.42365	0.202427	0.0292213	0.130187
Chr2	7370900	7371400	0.16498	0.202801	0.211464	0.275903	0.17025	0.39561	0.0229229	0.0330998
Chr2	7418700	7419000	0.296524	0.160409	0.336733	0.27398	0.276615	0.340555	0.0309118	0.0496802
Chr2	7420800	7421800	0.0874282	0.0585397	0.117942	0.142432	0.102282	0.265772	0.0639416	0.0513315
Chr2	7442400	7442600	0.161179	0.10564	0.0910314	0.224687	0.17094	0.310508	0.0647982	0.0555202
Chr2	7496400	7496600	0.252181	0.164687	0.252491	0.24795	0.311199	0.42578	0.15497	0.178843
Chr2	7503900	7504200	0.339618	0.258216	0.294913	0.231412	0.289687	0.203263	0.022535	0.0569789
Chr2	7535900	7536100	0.597471	0.447334	0.510739	0.529132	0.543128	0.562911	0.147	0.22076
Chr2	7536900	7537100	0.536919	0.281345	0.540407	0.486414	0.513583	0.444655	0.110676	0.0863122
Chr2	7566800	7567200	0.319377	0.281388	0.392989	0.287343	0.311726	0.266026	0.0121104	0.0259674
Chr2	7581400	7581900	0.101078	0.120543	0.121474	0.157148	0.146208	0.395646	0.113184	0.0974533
Chr2	7583600	7584200	0.161786	0.157312	0.185061	0.196837	0.169193	0.291053	0.082563	0.0676418
Chr2	7721500	7721800	0.0230655	0.0361303	0.0320088	0.0615111	0.0408164	0.0618907	0.00586723	0.00814148
Chr2	7730100	7730400	0.222036	0.183815	0.212481	0.237117	0.183707	0.185351	0.0294737	0.0472111
Chr2	7766600	7766800	0.236852	0.236075	0.263061	0.411271	0.368547	0.471866	0.0719556	0.0506751
Chr2	7814000	7814300	0.438491	0.377719	0.61038	0.384412	0.506853	0.290728	0.0545501	0.0428614
Chr2	7856500	7856700	0.283846	0.22196	0.325639	0.370777	0.227401	0.305	0.0852364	0.114289
Chr2	7875200	7875400	0.0675276	0.0681403	0.0647575	0.186487	0.0507348	0.242737	0.00958493	0.0177131
Chr2	7889600	7889800	0.167594	0.104279	0.196382	0.215394	0.248792	0.370135	0.0808252	0.0585034
Chr2	7956100	7956500	0.231798	0.227899	0.245413	0.202324	0.268316	0.470443	0.149214	0.0650525
Chr2	7961300	7961500	0.526977	0.247839	0.438061	0.488149	0.456661	0.168687	0.0688853	0.0224276
Chr2	7976300	7976500	0.213669	0.0656144	0.191805	0.250851	0.0978614	0.612854	0.0108889	0.0418394
Chr2	8009300	8009600	0.131835	0.137768	0.215969	0.200401	0.227957	0.586557	0.0508531	0.0847015
Chr2	8016800	8017200	0.0960073	0.127295	0.0791688	0.0894487	0.0685108	0.21391	0.0429274	0.0385081
Chr2	8046100	8046300	0.469298	0.314415	0.55144	0.392846	0.469593	0.333252	0.0524008	0.148538
Chr2	8061300	8061700	0.148151	0.112175	0.137718	0.183527	0.138702	0.453831	0.0418352	0.0254508
Chr2	8077700	8078200	0.460956	0.235842	0.499566	0.320271	0.490185	0.37404	0.0679232	0.0513679
Chr2	8090300	8090600	0.153651	0.155264	0.123729	0.213857	0.201113	0.178001	0.04758	0.0977782
Chr2	8102700	8103500	0.256685	0.160827	0.194937	0.22798	0.279632	0.350231	0.0478785	0.0708759
Chr2	8166700	8166900	0.333955	0.172957	0.394509	0.269714	0.380403	0.344616	0.0190352	0.040773
Chr2	8173400	8173600	0.470954	0.390624	0.543431	0.388435	0.540902	0.421522	0.0504014	0.0716305
Chr2	8201100	8201300	0.0960402	0.0664702	0.0414159	0.0674556	0.0921098	0.432048	0.0835332	0.0690121
Chr2	8236300	8236700	0.318678	0.210217	0.230532	0.189919	0.292962	0.112387	0.0220415	0.0369737
Chr2	8452000	8452200	0.205566	0.167879	0.242577	0.123541	0.135319	0.274334	0.0120709	0.0523402
Chr2	8489200	8489600	0.21996	0.150083	0.263458	0.238057	0.248104	0.12653	0.0340148	0.0421408
Chr2	8535100	8535300	0.359954	0.319645	0.347332	0.422677	0.399101	0.520159	0.0737485	0.0847393
Chr2	8569700	8569900	0.156629	0.0631953	0.104192	0.1342	0.0717315	0.401042	0.0771836	0.114202
Chr2	8575300	8575500	0.142112	0.104859	0.149763	0.100641	0.168517	0.290405	0.00725274	0.00773016
Chr2	8578600	8579200	0.170729	0.113189	0.192827	0.178015	0.192614	0.329172	0.0314036	0.0361813
Chr2	8641700	8642000	0.178841	0.164141	0.275945	0.250388	0.28629	0.303494	0.0301084	0.0572026
Chr2	8658000	8658300	0.166882	0.0691275	0.0881168	0.217085	0.17293	0.254655	0.0447341	0.0372751
Chr2	8854900	8855300	0.241343	0.187901	0.372373	0.187173	0.265984	0.275384	0.0589753	0.10525
Chr2	8893600	8893900	0.131909	0.0973178	0.106925	0.19331	0.127229	0.267924	0.0260075	0.031735
Chr2	8907400	8908200	0.37251	0.206924	0.403932	0.31378	0.364971	0.356319	0.0500155	0.117653
Chr2	8911000	8911500	0.266593	0.247224	0.21892	0.383738	0.28417	0.439969	0.151663	0.0837873
Chr2	8914000	8914400	0.0793717	0.0331397	0.0493731	0.138144	0.0784111	0.245287	0.0189908	0.0227499
Chr2	8997800	8998200	0.0556756	0.0652396	0.062354	0.110256	0.0729681	0.186342	0.0734319	0.0670187
Chr2	9005600	9005900	0.0613466	0.120883	0.0638603	0.104582	0.0904631	0.466984	0.0117569	0.0123934
Chr2	9021900	9022100	0.0508872	0.0386044	0.0248807	0.0839059	0.107105	0.149824	0.0127366	0.0124466
Chr2	9039000	9039200	0.197773	0.085862	0.0678218	0.258386	0.172934	0.433762	0.0183166	0.0104167
Chr2	9048400	9048600	0.0537832	0.0581329	0.11466	0.098695	0.0867408	0.360848	0.032043	0.0279704
Chr2	9059400	9059800	0.161331	0.126724	0.182958	0.157897	0.155033	0.178685	0.0533311	0.0795963
Chr2	9063900	9064200	0.263295	0.258302	0.319282	0.315071	0.260238	0.197593	0.034578	0.0529923
Chr2	9161800	9162000	0.0857861	0.0739265	0.121832	0.0951184	0.103252	0.193647	0.0138805	0.0528582
Chr2	9195200	9195400	0.0324228	0.0573226	0.048056	0.0865211	0.0414103	0.183743	0.0657204	0.058748
Chr2	9228800	9229200	0.517255	0.312597	0.55066	0.410044	0.591915	0.327363	0.050456	0.0501162
Chr2	9289700	9289900	0.236931	0.153791	0.22429	0.258144	0.173639	0.439061	0.0077551	0.0846413
Chr2	9314900	9315100	0.539875	0.430398	0.591494	0.464521	0.536803	0.508731	0.0770266	0.0867505
Chr2	9344600	9345100	0.0826218	0.0765504	0.0400493	0.0659856	0.0630362	0.204527	0.015624	0.0211711
Chr2	9350300	9350500	0.153816	0.11548	0.250799	0.207483	0.185486	0.282313	0.0325496	0.0115937
Chr2	9382400	9382600	0.0618201	0.082184	0.025682	0.0554396	0.0758566	0.274978	0.0532874	0.0409217
Chr2	9402700	9402900	0.0714975	0.109588	0.0806611	0.110779	0.114211	0.331042	0.0480338	0.00921746
Chr2	9432200	9432400	0.0449648	0.0153985	0.0270625	0.106776	0.0427536	0.276831	0.00357143	0.00336439
Chr2	9433100	9433500	0.476161	0.367057	0.459946	0.305987	0.420721	0.304465	0.0448522	0.0915304
Chr2	9439400	9439600	0.0886034	0.0650887	0.0874959	0.132402	0.189624	0.433439	0.0077922	0.0486021
Chr2	9455100	9455300	0.442661	0.273894	0.414403	0.340511	0.498632	0.237687	0.0531657	0.112871
Chr2	9470700	9470900	0.0698348	0.0742885	0.0367253	0.151842	0.0375367	0.333005	0.00738994	0.0528849
Chr2	9486700	9487000	0.0685119	0.0703012	0.108599	0.0513223	0.073079	0.213559	0.0400146	0.0806592
Chr2	9550400	9550600	0.0536119	0.0561026	0.0155962	0.146537	0.0970722	0.257997	0.00769514	0.0294272
Chr2	9559500	9559800	0.0349916	0.0496474	0.193361	0.11957	0.134325	0.35108	0.00578471	0.0113411
Chr2	9566900	9567100	0	0.00659107	0.00325281	0.01731	0.00490069	0.212311	0.00438489	0.0987839
Chr2	9585100	9585300	0.566017	0.491622	0.515477	0.425658	0.552151	0.307558	0.169641	0.0667058
Chr2	9594600	9595000	0.420633	0.390044	0.490455	0.357318	0.479182	0.410884	0.0585239	0.13879
Chr2	9595700	9595900	0.600714	0.450636	0.505084	0.472215	0.520644	0.350051	0.130028	0.157088
Chr2	9633500	9633800	0.322661	0.257652	0.363073	0.246345	0.419198	0.331835	0.108972	0.173301
Chr2	9634900	9635100	0.409005	0.383538	0.550251	0.382573	0.443283	0.519945	0.245616	0.190218
Chr2	9644200	9644400	0.0640372	0.0986324	0.0624412	0.119209	0.111804	0.201621	0.0128389	0.0475112
Chr2	9656300	9656600	0.44788	0.395766	0.406031	0.449395	0.496996	0.16417	0.0708589	0.0581202
Chr2	9692900	9693300	0.185599	0.206077	0.135947	0.1619	0.206617	0.322508	0.107166	0.0720716
Chr2	9713100	9713400	0.0345034	0.0371811	0.0880597	0.110506	0.108044	0.147966	0.0089102	0.0160453
Chr2	9855300	9855500	0.0802109	0.0603878	0.127091	0.118323	0.119797	0.298048	0.0526397	0.0696658
Chr2	9860000	9860500	0.550977	0.309818	0.500695	0.394595	0.490398	0.307742	0.029031	0.0705476
Chr2	9885300	9885500	0.113392	0.128818	0.167931	0.15392	0.167885	0.260881	0.00512478	0.0269736
Chr2	9891300	9891600	0.307278	0.200601	0.485705	0.338908	0.359598	0.226362	0.00697976	0.0331448
Chr2	10001600	10001800	0.193409	0.139597	0.166721	0.175072	0.159522	0.357765	0.0853095	0.0867756
Chr2	10070100	10070400	0.434591	0.296531	0.441298	0.46233	0.526974	0.332416	0.0839243	0.0486173
Chr2	10138000	10138200	0.0188101	0.0316108	0.0758874	0.161603	0.0342211	0.332292	0	0.029394
Chr2	10194700	10195000	0.100468	0.0782708	0.14495	0.249113	0.149745	0.449472	0.00844313	0.137421
Chr2	10238900	10239500	0.422161	0.28769	0.416461	0.438044	0.382808	0.379191	0.075215	0.0592787
Chr2	10255000	10256000	0.474908	0.423812	0.490912	0.455302	0.503401	0.329135	0.113465	0.104003
Chr2	10306100	10306300	0.225332	0.148907	0.200988	0.154667	0.26148	0.388783	0.137369	0.0523794
Chr2	10317800	10318600	0.239602	0.228645	0.256932	0.221599	0.212439	0.248418	0.0352384	0.0497846
Chr2	10437000	10437400	0.344952	0.246568	0.370671	0.247214	0.319844	0.324292	0.0738431	0.100789
Chr2	10467300	10467700	0.266516	0.142855	0.2187	0.191548	0.253306	0.225551	0.0238937	0.132252
Chr2	10535700	10535900	0.16957	0.0894399	0.0812144	0.162392	0.120632	0.244228	0.00965744	0.0545481
Chr2	10549800	10550100	0.0589763	0.0570017	0.0413604	0.0795648	0.0692404	0.138925	0.0210885	0.0197348
Chr2	10566200	10566400	0.111189	0.0316668	0.146785	0.0808377	0.0832484	0.141659	0.0567252	0.0564022
Chr2	10588700	10588900	0.130234	0.0476018	0.0358573	0.0966085	0.0886432	0.363356	0.0180621	0.0151842
Chr2	10608800	10609000	0.395843	0.23298	0.420066	0.273826	0.304289	0.227638	0.0449032	0.106743
Chr2	10678200	10678400	0.17271	0.177777	0.204503	0.235511	0.262909	0.399494	0.0701626	0.0289689
Chr2	10683700	10683900	0.386622	0.28148	0.387599	0.313683	0.400847	0.284911	0.00462963	0.0291375
Chr2	10687000	10687300	0.112634	0.0727359	0.129837	0.0740789	0.108613	0.210903	0.0313182	0.0145802
Chr2	10797000	10797300	0.254205	0.16908	0.273153	0.265396	0.217545	0.285913	0.0194849	0.0675604
Chr2	10842000	10842400	0.0989985	0.0755426	0.117801	0.119505	0.129125	0.331104	0.0164102	0.0626973
Chr2	10880000	10880200	0.189685	0.0541115	0.151137	0.117874	0.185889	0.394271	0.126383	0.0848275
Chr2	10973200	10973800	0.12173	0.208046	0.215372	0.222117	0.21903	0.378316	0.0187728	0.0731546
Chr2	10996200	10996700	0.423618	0.266361	0.433209	0.337735	0.383328	0.323166	0.0512868	0.0788737
Chr2	11066400	11066600	0.154798	0.145423	0.12155	0.117061	0.165509	0.233809	0.0383096	0.0311817
Chr2	11075900	11076200	0.0934211	0.04427	0.114678	0.0721104	0.0753785	0.332123	0.00610508	0.0200075
Chr2	11128800	11129100	0.160199	0.172941	0.18527	0.183663	0.169907	0.14291	0.0321462	0.0655933
Chr2	11177100	11177300	0.180289	0.198964	0.191407	0.209191	0.271143	0.439903	0.0352162	0.0493296
Chr2	11285100	11285300	0.47479	0.296392	0.559546	0.319705	0.5007	0.484986	0.0243218	0.114801
Chr2	11286200	11286700	0.569847	0.498108	0.475811	0.419237	0.489084	0.258211	0.0332515	0.071253
Chr2	11308600	11309200	0.296788	0.145083	0.275357	0.294585	0.295636	0.201066	0.0437368	0.0578351
Chr2	11550100	11550300	0.140688	0.115665	0.196553	0.156577	0.0986284	0.147369	0.0429434	0.0357058
Chr2	11555400	11555700	0.224719	0.183014	0.338643	0.291968	0.234879	0.276491	0.0405587	0.0568546
Chr2	11597300	11597600	0.405447	0.236855	0.482688	0.357301	0.512537	0.35266	0.0606569	0.0728299
Chr2	11619300	11619700	0.11103	0.101528	0.148318	0.104149	0.156916	0.188948	0.00458829	0.0240432
Chr2	11623700	11623900	0.160234	0.165824	0.109289	0.423549	0.34368	0.573994	0.0972897	0.143552
Chr2	11739900	11740100	0.171057	0.122209	0.149219	0.217242	0.171533	0.310708	0.024974	0.0208484
Chr2	11908900	11909100	0.395361	0.452521	0.406347	0.621089	0.608911	0.444498	0.0930645	0.0471826
Chr2	11920500	11920900	0.0429416	0.0887721	0.0675005	0.144614	0.0463834	0.260295	0.00518065	0.0272971
Chr2	11952700	11953200	0.048666	0.0544035	0.0385285	0.0619366	0.0413239	0.113281	0.0118669	0.0225068
Chr2	11983100	11983300	0.395207	0.270666	0.416021	0.273641	0.422314	0.293076	0.0479049	0.0844099
Chr2	11983600	11983900	0.214723	0.187013	0.249593	0.272494	0.199402	0.399637	0.0743044	0.0965281
Chr2	12076100	12076300	0.0525789	0.0227063	0.0373261	0.0502759	0.0704614	0.215246	0.027824	0.0573869
Chr2	12092500	12092700	0.430468	0.10696	0.418013	0.261371	0.45355	0.250608	0.0078125	0.0179042
Chr2	12093400	12094100	0.499703	0.422273	0.508336	0.417948	0.522024	0.226203	0.0693828	0.0839651
Chr2	12243000	12243300	0.0599284	0.0519668	0.113488	0.129492	0.132477	0.237209	0.0225156	0.0171642
Chr2	12256100	12256300	0.0798765	0.124139	0.0620333	0.055354	0.0688099	0.291742	0.0432078	0.0159042
Chr2	12309900	12310200	0.117686	0.111876	0.179901	0.179533	0.191691	0.340217	0.00782127	0.0464999
Chr2	12372600	12372800	0.286243	0.192097	0.362809	0.321793	0.270374	0.411983	0.0152707	0.127472
Chr2	12410000	12410400	0.0701231	0.026058	0.0471613	0.171983	0.0519384	0.141384	0.00271624	0.0745072
Chr2	12554000	12554500	0.296719	0.254991	0.329974	0.291589	0.229496	0.330499	0.0196682	0.0470677
Chr2	12566100	12566300	0.0229104	0.0613487	0.0883305	0.0398072	0.0287385	0.208744	0.0280716	0.0276117
Chr2	12578300	12578500	0.136503	0.0455949	0.142816	0.180571	0.19274	0.201256	0.0602633	0.0453404
Chr2	12708700	12709000	0.137197	0.0737799	0.107193	0.142574	0.0761255	0.208346	0.00706307	0.0254525
Chr2	12725300	12725600	0.243364	0.163785	0.138105	0.193341	0.141303	0.39665	0.0343292	0.0146703
Chr2	12740100	12740300	0.261279	0.131348	0.257875	0.247387	0.226532	0.270793	0.00543478	0.0476582
Chr2	12773700	12773900	0.00630252	0.0130888	0.0079045	0.00201613	0.00377358	0.010031	0.00394265	0.0370459
Chr2	12801800	12802000	0.567399	0.531839	0.476904	0.406037	0.506328	0.355139	0.0176062	0.0760541
Chr2	12809700	12810100	0.231027	0.190132	0.295415	0.177282	0.232335	0.160755	0.0177782	0.0760605
Chr2	12811700	12811900	0.247707	0.213166	0.182311	0.265392	0.362868	0.352306	0.0200895	0.176345
Chr2	12812600	12812800	0.237888	0.167998	0.190384	0.214688	0.190455	0.262374	0.0795554	0.115376
Chr2	12833600	12833800	0.0759422	0.0348222	0.169986	0.130084	0.0670721	0.210721	0.00185185	0.0166667
Chr2	12877100	12877500	0.295742	0.121405	0.29233	0.204944	0.130042	0.32373	0.0152842	0.0377
Chr2	13211300	13211600	0.157917	0.0772788	0.191314	0.13963	0.132501	0.389057	0.0215703	0.0293947
Chr2	13227700	13227900	0.0918805	0.0696442	0.0949319	0.0643311	0.134749	0.515498	0.0116435	0.0142798
Chr2	13232800	13233000	0.0930036	0.0481114	0.0566465	0.184539	0.0249258	0.260763	0.00775714	0.0270833
Chr2	13267900	13268800	0.521618	0.390365	0.480428	0.371401	0.496082	0.145923	0.0503799	0.0421818
Chr2	13336400	13336600	0.504317	0.458205	0.464563	0.413395	0.468978	0.233054	0.00703704	0.0393509
Chr2	13337000	13337300	0.533875	0.425999	0.604632	0.422452	0.447821	0.315048	0.0384177	0.122712
Chr2	13374500	13374700	0.179428	0.12222	0.123114	0.217335	0.127877	0.542539	0.03209	0.013362
Chr2	13375100	13375300	0.171118	0.198	0.202247	0.142774	0.208814	0.271774	0.0564912	0.0241682
Chr2	13404400	13404600	0.142759	0.151767	0.160941	0.324634	0.238884	0.732696	0.017375	0.021617
Chr2	13421900	13422100	0.0936488	0.123306	0.144102	0.204774	0.137275	0.236774	0.0675661	0.140257
Chr2	13433000	13433400	0.118425	0.0176282	0.132961	0.135748	0.125467	0.410048	0.0495768	0.0242579
Chr2	13634000	13634200	0.242758	0.265815	0.372108	0.299696	0.289724	0.295703	0.00999041	0.0350064
Chr2	13661300	13661500	0.442279	0.16227	0.369285	0.334126	0.345385	0.547124	0.00151515	0.16424
Chr2	13793600	13793800	0.174214	0.142749	0.205426	0.252797	0.257003	0.350498	0.0511072	0.0306492
Chr2	13794200	13794600	0.151274	0.206709	0.204383	0.224866	0.294057	0.298429	0.0390132	0.0412009
Chr2	13808000	13808200	0.0595591	0.0401112	0.0460292	0.0826999	0.080256	0.330276	0.10346	0.0715262
Chr2	13885900	13886500	0.516397	0.326908	0.416273	0.496691	0.516341	0.307446	0.0881103	0.101186
Chr2	13907400	13907600	0.629912	0.496488	0.477969	0.417116	0.444119	0.183833	0.108307	0.0207294
Chr2	13907900	13908200	0.533418	0.500665	0.44708	0.409646	0.524624	0.310044	0.0216608	0.13109
Chr2	14063500	14063700	0.0809949	0.110875	0.0340539	0.0583333	0.00625	0.294203	0.0343161	0.026455
Chr2	14190700	14190900	0.0451811	0.0251053	0.020643	0.115179	0.113765	0.277304	0.0171471	0.0316275
Chr2	14290600	14290800	0.068934	0.0463657	0.0265072	0.0775003	0.0472857	0.409389	0.0306031	0.0319459
Chr2	14311200	14311700	0.214686	0.130709	0.234215	0.169314	0.300939	0.230368	0.00785462	0.0601276
Chr2	14334400	14335000	0.544119	0.345644	0.507095	0.396426	0.383966	0.241594	0.0401435	0.0708237
Chr2	14363700	14364000	0.220685	0.0391813	0.143605	0.197155	0.180491	0.533321	0.0173802	0.0336545
Chr2	14392800	14393100	0.120405	0.0674317	0.14469	0.165847	0.204968	0.360223	0.00614591	0.0485678
Chr2	14415300	14415500	0.13746	0.0625622	0.273873	0.208388	0.180338	0.386599	0.00408163	0.024161
Chr2	14457300	14457500	0.442725	0.356054	0.508892	0.445733	0.50971	0.510159	0.104486	0.13152
Chr2	14458400	14458600	0.604609	0.530354	0.488206	0.432874	0.398978	0.579853	0.112688	0.205771
Chr2	14554900	14555100	0.273057	0.270777	0.322443	0.321454	0.265004	0.299403	0.0300975	0.126272
Chr2	14572500	14572800	0.459017	0.338791	0.487478	0.355606	0.472265	0.299941	0.0812182	0.0722509
Chr2	14595000	14595300	0.242954	0.171138	0.180102	0.26656	0.227919	0.420816	0.00735197	0.0400536
Chr2	14597300	14597500	0.0708391	0.0562781	0.0698792	0.0651364	0.138184	0.190897	0.0499974	0.0624195
Chr2	14653500	14653700	0.00427351	0.00585047	0.084946	0.0575281	0.0627814	0.143173	0.00838173	0.0150677
Chr2	14675800	14676400	0.181225	0.103771	0.175422	0.204057	0.162932	0.219838	0.0178757	0.0469894
Chr2	14682600	14683100	0.379349	0.361535	0.45365	0.369776	0.412929	0.219007	0.0556939	0.139269
Chr2	14858900	14859200	0.169223	0.072166	0.135424	0.142668	0.206987	0.215775	0.0387403	0.0714124
Chr2	14951800	14952900	0.226601	0.205229	0.256724	0.254801	0.288647	0.289253	0.0708114	0.0754381
Chr2	15097800	15098000	0.360464	0.277303	0.258175	0.259193	0.253024	0.436263	0.0759563	0.102854
Chr2	15110000	15110300	0.0256226	0.0677675	0.0240741	0.0747593	0.0785366	0.338331	0.0137058	0.00646767
Chr2	15134200	15134800	0.370912	0.295074	0.415577	0.371084	0.383825	0.335003	0.032893	0.101724
Chr2	15140800	15141300	0.194038	0.259111	0.299903	0.238077	0.203817	0.191246	0.0342679	0.0423698
Chr2	15190500	15190700	0.305003	0.299692	0.419128	0.308347	0.2722	0.573061	0.0699735	0.0766664
Chr2	15402100	15402300	0.106396	0.0721681	0.216918	0.167426	0.207125	0.502455	0.0143915	0.0455284
Chr2	15448900	15449100	0.226497	0.20509	0.311494	0.343549	0.336697	0.589274	0.0116799	0.0107235
Chr2	15566900	15567300	0.185699	0.0979215	0.0957784	0.10241	0.180413	0.278064	0.0979678	0.0607412
Chr2	15567600	15568000	0.0736999	0.113613	0.110376	0.159586	0.0877153	0.269645	0.0285627	0.0260679
Chr2	15733500	15733700	0.186617	0.213866	0.2061	0.142901	0.129033	0.301248	0.0305809	0.0147519
Chr2	15821400	15821700	0.0920619	0.0931071	0.161029	0.15562	0.173627	0.442569	0.0253539	0.0211095
Chr2	16003500	16003800	0.0753862	0.0830535	0.10473	0.244451	0.0694786	0.315067	0.11573	0.104425
Chr2	16007800	16008100	0.147656	0.112607	0.119209	0.157851	0.155524	0.424004	0.120521	0.0787038
Chr2	16150400	16151000	0.213661	0.149769	0.242924	0.238074	0.258249	0.304685	0.0589239	0.0792071
Chr2	16280700	16281200	0.162578	0.119443	0.171965	0.190021	0.163931	0.0973036	0.00561858	0.0582497
Chr2	16302500	16302800	0.0873016	0.0894841	0.127333	0.145157	0.105811	0.248645	0	0.0302721
Chr2	16347400	16347700	0.140078	0.0823189	0.16126	0.113098	0.118936	0.295279	0.0388515	0.0556224
Chr2	16379600	16379800	0.531183	0.451585	0.543575	0.556511	0.490374	0.643078	0.0889193	0.161233
Chr2	16380700	16380900	0.210841	0.206573	0.225987	0.22973	0.2973	0.455837	0.0637559	0.156116
Chr2	16467100	16467300	0.12332	0.0716596	0.214898	0.212845	0.112998	0.440878	0.0299578	0.0295889
Chr2	16556000	16556200	0.10053	0.137587	0.168971	0.249024	0.175848	0.54626	0.255668	0.197817
Chr2	16560500	16560800	0.136999	0.105904	0.105641	0.172018	0.113084	0.434556	0.00616511	0.0454719
Chr2	16603500	16603800	0.162697	0.1864	0.232956	0.179214	0.258781	0.506219	0.153272	0.189956
Chr2	16625700	16625900	0.143715	0.105986	0.144554	0.143697	0.10258	0.423284	0.0289732	0.0578287
Chr2	16626200	16626800	0.110756	0.105048	0.14971	0.147333	0.131525	0.197718	0.0410112	0.0545559
Chr2	16798600	16798900	0.077786	0.0692588	0.140724	0.225948	0.16944	0.579745	0.234042	0.178874
Chr2	16876900	16877200	0.55098	0.456282	0.620503	0.491622	0.602762	0.592761	0.142921	0.130942
Chr2	16921500	16921700	0.140072	0.234672	0.209196	0.209152	0.316313	0.462835	0.024058	0.0730171
Chr2	16952600	16952800	0.0420921	0.0342598	0.018652	0.0345403	0.0385125	0.244835	0.00592604	0.00855278
Chr2	17147100	17147600	0.62859	0.398383	0.565801	0.382515	0.548882	0.302502	0.0491263	0.0628232
Chr2	17205900	17206100	0.102871	0.10572	0.130114	0.182696	0.098037	0.399823	0.0210533	0.0256428
Chr2	17253200	17253400	0.462687	0.273135	0.580719	0.538139	0.613481	0.379367	0.0254129	0.0769699
Chr2	17255800	17256000	0.257504	0.218092	0.309887	0.311757	0.250495	0.457999	0.101819	0.0844288
Chr2	17256600	17256800	0.354107	0.245909	0.329727	0.374895	0.3264	0.460782	0.147717	0.178087
Chr2	17299400	17299800	0.235186	0.145227	0.254026	0.226	0.272351	0.251313	0.0177853	0.0501368
Chr2	17307600	17307800	0.100448	0.086135	0.132534	0.211641	0.154387	0.564753	0.0190979	0.00638351
Chr2	17363500	17363800	0.0760761	0.0405768	0.0736032	0.135302	0.0773815	0.32001	0.0419684	0.048412
Chr2	17417900	17418100	0.324027	0.189192	0.406648	0.461266	0.434312	0.368668	0.0511511	0.0867556
Chr2	17488700	17489000	0.119194	0.061912	0.158997	0.117057	0.0578129	0.349133	0.0198366	0.114825
Chr2	17545800	17546000	0.223891	0.203933	0.28553	0.286757	0.245923	0.424005	0.155231	0.224943
Chr2	17904700	17904900	0.433174	0.478527	0.557757	0.144258	0.430287	0.26788	0.0465368	0.0470588
Chr2	17992500	17993200	0.408252	0.245327	0.41526	0.391671	0.45629	0.392397	0.0334351	0.0793339
Chr2	18091900	18092200	0.130897	0.129234	0.126495	0.0957747	0.139172	0.39585	0.00993388	0.018067
Chr2	18093100	18093300	0.265938	0.232811	0.188771	0.327237	0.307512	0.584269	0.0950498	0.0650243
Chr2	18106700	18107000	0.326869	0.283811	0.288713	0.339046	0.312636	0.469436	0.156885	0.0605115
Chr2	18165900	18166100	0.0511392	0.0629408	0.0906886	0.137175	0.0926017	0.256216	0.0208952	0.0258155
Chr2	18353700	18353900	0.0831867	0.0775298	0.0695276	0.0772617	0.0690284	0.264813	0.0407768	0.0146529
Chr2	18387800	18388000	0.107958	0.0698053	0.139323	0.16024	0.154716	0.37367	0.0307925	0.0192332
Chr2	18396000	18396200	0.106679	0.155227	0.158032	0.140654	0.189603	0.347875	0.00856675	0.0205883
Chr2	18498000	18498600	0.100396	0.09635	0.122886	0.128326	0.110161	0.218547	0.0646515	0.0840827
Chr2	18594900	18595200	0.166306	0.166509	0.173976	0.223361	0.191536	0.252341	0.0296445	0.0845761
Chr2	18660000	18660300	0.0427771	0.0469561	0.0725171	0.0481448	0.0399017	0.219462	0.00946033	0.0238254
Chr2	18702500	18703200	0.0723538	0.0688277	0.125525	0.0733554	0.072554	0.194276	0.0396858	0.0307067
Chr2	18890900	18891300	0.0951174	0.0708379	0.0791253	0.0927824	0.0736534	0.171999	0.0219218	0.0299381
Chr2	18957700	18958000	0.0901738	0.096433	0.0849366	0.153331	0.0997313	0.412395	0.0168732	0.0181793
Chr2	19143700	19143900	0.0123626	0.0112404	0.0114343	0.0555303	0	0.225901	0.0034188	0.00509906
Chr2	19163200	19163500	0.132456	0.120124	0.114369	0.0770333	0.136858	0.164059	0	0.0237436
Chr2	19172300	19172700	0.505433	0.290915	0.436831	0.469292	0.521506	0.2529	0.0200057	0.124687
Chr2	19195400	19195900	0.331967	0.158192	0.372064	0.218882	0.310209	0.303905	0.0767952	0.0759211
Chr2	19220100	19220500	0.0265256	0.0405975	0.0541469	0.0672299	0.0299928	0.146048	0.040317	0.0494407
Chr2	19235800	19236100	0.127371	0.0930365	0.0886458	0.154221	0.11821	0.218333	0.0177489	0.00990675
Chr2	19242700	19243200	0.494575	0.349205	0.50276	0.405639	0.54681	0.434972	0.0467592	0.0715252
Chr2	19269000	19269200	0.338706	0.221857	0.350143	0.366807	0.398854	0.335555	0.0354501	0.0625938
Chr2	19322500	19322700	0.585429	0.460354	0.690113	0.522183	0.573059	0.583092	0.095747	0.1618
Chr2	19323100	19323800	0.605452	0.413545	0.553163	0.448652	0.516062	0.432152	0.129032	0.170422
Chr2	19433200	19433400	0.128654	0.107444	0.0987421	0.0914009	0.154398	0.315262	0.00841794	0.0208374
Chr2	19527900	19528900	0.262544	0.19615	0.290884	0.23305	0.321642	0.276215	0.0498152	0.0563826
Chr2	19623100	19623600	0.555159	0.332954	0.475919	0.516468	0.551068	0.404553	0.0409325	0.0766569
Chr3	42800	43100	0.241024	0.1344	0.213603	0.272186	0.327574	0.602174	0.00205722	0.038064
Chr3	105600	105800	0.0559542	0.05893	0.0909376	0.160294	0.0910972	0.311248	0.0067723	0.00771501
Chr3	132500	132700	0.0426488	0.0399206	0.056957	0.0619829	0.165146	0.316989	0.0025	0.0195008
Chr3	422700	423200	0.553748	0.398879	0.574229	0.450041	0.587844	0.482173	0.0996112	0.0741342
Chr3	451800	452200	0.142081	0.177254	0.158833	0.141825	0.194167	0.263744	0.0118312	0.0168422
Chr3	495700	496000	0.0527781	0.11866	0.102065	0.103123	0.116154	0.376434	0.00946672	0.0109026
Chr3	525000	525300	0.0732361	0.0603976	0.0491221	0.037818	0.087628	0.332487	0.0614222	0.049046
Chr3	538900	539200	0.220966	0.173362	0.291616	0.322913	0.300482	0.334796	0.0225146	0.0854978
Chr3	557500	558100	0.111575	0.0786056	0.113273	0.182344	0.161735	0.275249	0.00547858	0.00284774
Chr3	1031400	1031600	0.062202	0.0803846	0.0756284	0.0494034	0.0499878	0.317339	0	0.00181488
Chr3	1166400	1166800	0.182546	0.226267	0.207476	0.34626	0.227156	0.232516	0.0081919	0.0237712
Chr3	1170700	1171100	0.265003	0.136413	0.272421	0.250819	0.248647	0.386291	0.136449	0.178552
Chr3	1283500	1284000	0.44991	0.299175	0.437247	0.32237	0.437701	0.256633	0.0302589	0.0532243
Chr3	1341700	1342200	0.0790817	0.066	0.0815297	0.0797693	0.124458	0.240935	0.0044686	0.039016
Chr3	1370200	1370900	0.468216	0.402586	0.5202	0.467344	0.513827	0.205609	0.00819656	0.028485
Chr3	1571500	1571900	0.581092	0.393643	0.524109	0.480419	0.549713	0.295323	0.0474623	0.0458422
Chr3	1602100	1602300	0.385524	0.326127	0.421075	0.465663	0.347438	0.397938	0.025798	0.0455751
Chr3	1924000	1924300	0.626945	0.538794	0.715335	0.689979	0.694125	0.576139	0.270509	0.188658
Chr3	1928300	1928600	0.128193	0.109217	0.21254	0.1692	0.136201	0.441182	0.0028169	0.0029932
Chr3	1951500	1951700	0.0676596	0.080567	0.157376	0.142919	0.0953005	0.555795	0.00547854	0.00281385
Chr3	2138400	2138600	0.352949	0.273477	0.372367	0.293083	0.50054	0.553063	0.199047	0.139872
Chr3	2251400	2251600	0.0191715	0.0374636	0.0875882	0.057766	0.074054	0.23356	0.0263801	0.0447857
Chr3	2258800	2259400	0.305894	0.202093	0.287303	0.276536	0.311069	0.390685	0.111766	0.172592
Chr3	2259700	2260000	0.312372	0.276235	0.338393	0.428175	0.39625	0.50105	0.118733	0.0883117
Chr3	2260800	2261000	0.387479	0.311052	0.386758	0.298688	0.27536	0.65114	0.192666	0.208237
Chr3	2628500	2628700	0.302712	0.151703	0.26564	0.238101	0.298902	0.244127	0.0268263	0.0992761
Chr3	2629100	2629300	0.488386	0.393753	0.468551	0.445548	0.497379	0.368345	0.0634977	0.0764087
Chr3	2772600	2772900	0.0917367	0.0548507	0.118253	0.123257	0.150032	0.291251	0.032371	0.042023
Chr3	2773500	2773700	0.131625	0.0759635	0.137866	0.0363712	0.087611	0.380572	0.0242484	0.00448484
Chr3	2849400	2849800	0.0807336	0.06036	0.0703558	0.102036	0.0925832	0.190473	0.0247296	0.0194869
Chr3	2971400	2971600	0.222094	0.0845471	0.209774	0.195326	0.21514	0.45229	0.0196162	0.0838997
Chr3	2998300	2998600	0.180934	0.110419	0.401363	0.327111	0.0679333	0.689679	0.00231596	0.0625352
Chr3	3080000	3080600	0.491654	0.343038	0.398701	0.459607	0.429936	0.409892	0.0540812	0.045965
Chr3	3204700	3205400	0.165775	0.138935	0.233851	0.219583	0.218887	0.310996	0.0533693	0.0493889
Chr3	3423500	3423800	0.130901	0.123474	0.156852	0.133381	0.187358	0.536667	0.0337707	0.117888
Chr3	3538900	3539100	0.15811	0.121344	0.180863	0.192394	0.196483	0.356315	0.0501921	0.0717989
Chr3	3838800	3839000	0.179183	0.183748	0.257288	0.241618	0.215525	0.303798	0.0186207	0.0536023
Chr3	3873800	3874000	0.345397	0.283528	0.382623	0.29223	0.331274	0.275598	0.0313596	0.0555403
Chr3	3874300	3874600	0.271811	0.134866	0.29752	0.300551	0.333578	0.30991	0.0033543	0.0361412
Chr3	3965100	3965500	0.539377	0.444385	0.562738	0.505079	0.546735	0.260179	0.0185561	0.0984916
Chr3	4118500	4118700	0.0929368	0.0188293	0.104632	0.135162	0.141801	0.494953	0.00606061	0.052802
Chr3	4263000	4263300	0.294822	0.163494	0.161719	0.222465	0.303158	0.5963	0.00825029	0.0413041
Chr3	4468200	4468500	0.50307	0.296953	0.493246	0.417998	0.495987	0.285651	0.0447259	0.0526908
Chr3	4494100	4494400	0.246227	0.142819	0.103462	0.228773	0.282105	0.673746	0.00787862	0.00457875
Chr3	4494800	4495000	0.238353	0.206899	0.275464	0.259263	0.275561	0.309391	0.0494312	0.0404112
Chr3	4497600	4497800	0.0660538	0.0949098	0.0997427	0.158878	0.0944675	0.347599	0.00533678	0.017548
Chr3	4552100	4552300	0.36551	0.291856	0.422091	0.210496	0.308274	0.238723	0.0271888	0.0158149
Chr3	4579200	4579700	0.569752	0.429507	0.575983	0.480039	0.55702	0.407296	0.105069	0.103167
Chr3	4727800	4728000	0.0173077	0.00862069	0.0212963	0.00952381	0.0077381	0.200762	0	0.041377
Chr3	4745600	4745800	0.134595	0.0856574	0.220766	0.228201	0.119854	0.544989	0.00492425	0.0111669
Chr3	4752100	4752300	0.277231	0.11213	0.323034	0.319553	0.314479	0.379592	0.0637056	0.154549
Chr3	4752900	4753100	0.198396	0.178212	0.368053	0.313264	0.216258	0.502778	0.0682779	0.157183
Chr3	4796100	4796500	0.192764	0.0955348	0.241613	0.215644	0.170481	0.314556	0.0487023	0.0596658
Chr3	4977200	4977400	0.362586	0.224958	0.323481	0.342194	0.374533	0.317943	0.0949307	0.0688528
Chr3	4977700	4978000	0.50396	0.341456	0.409617	0.422251	0.446218	0.257571	0.0360439	0.105962
Chr3	5137400	5137800	0.233249	0.15095	0.214364	0.224044	0.259079	0.348594	0.0456427	0.089999
Chr3	5328600	5328800	0.142581	0.0387018	0.229697	0.113704	0.19169	0.480225	0.0122016	0
Chr3	5590800	5591000	0.553229	0.382727	0.616766	0.486216	0.566584	0.353564	0.068636	0.125159
Chr3	5622600	5622900	0.498169	0.301604	0.47944	0.452096	0.43005	0.237375	0.0180871	0.0701543
Chr3	5623700	5624100	0.177467	0.167006	0.277237	0.159183	0.270513	0.337962	0.0103616	0.0125443
Chr3	5651200	5651500	0.212237	0.148393	0.188364	0.207305	0.168918	0.271417	0.0212767	0.0502991
Chr3	5652200	5652500	0.23764	0.134239	0.136178	0.19932	0.232615	0.343878	0.192296	0.107678
Chr3	5729600	5729900	0.21397	0.122898	0.168384	0.0882453	0.137805	0.335919	0.0120181	0.0494862
Chr3	5744500	5745900	0.531312	0.386671	0.470975	0.41022	0.478117	0.288059	0.0319779	0.0766843
Chr3	5793100	5793400	0.250305	0.206631	0.366861	0.345927	0.325747	0.233141	0.055752	0.0318144
Chr3	5836300	5836600	0.0808315	0.0220899	0.0842544	0.0771984	0.0647038	0.241074	0.00555555	0.0223684
Chr3	5839300	5839500	0.160125	0.114611	0.211738	0.195431	0.173197	0.345273	0	0.011863
Chr3	5840000	5840300	0.0590648	0.133204	0.0420967	0.151455	0.300019	0.459781	0.00637116	0.0219019
Chr3	5929400	5929800	0.449266	0.405297	0.539171	0.455405	0.437464	0.485118	0.217989	0.308714
Chr3	5930500	5930700	0.0974278	0.0826207	0.0818246	0.0921798	0.116508	0.410271	0.171207	0.272069
Chr3	5954900	5955300	0.0418027	0.0774312	0.061702	0.0670666	0.0708095	0.198497	0.0702043	0.0587895
Chr3	5982700	5982900	0.232917	0.0966035	0.231664	0.199226	0.178726	0.32803	0.123044	0.0404204
Chr3	6073400	6073700	0.357068	0.267004	0.35235	0.243434	0.372627	0.292399	0.0738372	0.0572812
Chr3	6344700	6345000	0.0531113	0.0464954	0.0266648	0.101894	0.103248	0.270804	0.00328947	0.0183875
Chr3	6486300	6487000	0.239126	0.165626	0.208763	0.231474	0.260512	0.308106	0.0628408	0.0656749
Chr3	6668400	6668600	0.0998473	0.119855	0.084084	0.0584814	0.0841511	0.232074	0.0174485	0.0179473
Chr3	6717900	6718100	0.0165781	0.0664715	0.0987486	0.0770712	0.161504	0.420377	0.0236643	0.0681319
Chr3	6729000	6729500	0.534538	0.431552	0.569145	0.442026	0.576077	0.331107	0.0932198	0.0697327
Chr3	6941400	6941600	0.269715	0.234759	0.322534	0.300693	0.350019	0.24549	0.012188	0.137247
Chr3	6942400	6942600	0.563981	0.451589	0.629303	0.435652	0.511664	0.470238	0.077399	0.173718
Chr3	7040900	7041200	0.0738842	0.0424676	0.0695851	0.116338	0.0649022	0.202475	0.0329118	0.0461507
Chr3	7093900	7094200	0.0850151	0.0638565	0.0673966	0.132834	0.101688	0.308896	0.0106848	0.0260664
Chr3	7279200	7279500	0.28138	0.223625	0.226125	0.354921	0.255605	0.212055	0.0314882	0.0185603
Chr3	7291800	7292000	0.354628	0.323768	0.415658	0.346532	0.431521	0.331024	0.0834845	0.0914924
Chr3	7318900	7319100	0.395063	0.418792	0.524652	0.49569	0.524888	0.316534	0.012037	0.0405991
Chr3	7355600	7355800	0.0177204	0.0296433	0.0115974	0.092984	0.0157682	0.163285	0.00128205	0.0192744
Chr3	7634600	7634900	0.149445	0.103187	0.16938	0.178884	0.174654	0.380545	0.0199389	0.028135
Chr3	7643900	7644100	0.252707	0.290671	0.309933	0.256068	0.362765	0.593564	0.079556	0.0860341
Chr3	7658900	7659500	0.414548	0.277843	0.446374	0.316155	0.425268	0.338134	0.0321381	0.0912407
Chr3	7713600	7714200	0.240069	0.12749	0.23079	0.265198	0.262572	0.292047	0.0294264	0.0625518
Chr3	7765600	7765800	0.155427	0.121653	0.212623	0.239498	0.213825	0.33443	0.00767045	0.0579507
Chr3	7766400	7766800	0.349234	0.237087	0.400237	0.266378	0.407429	0.282186	0.0535689	0.0518746
Chr3	7772700	7773000	0.0979873	0.123877	0.127361	0.0956204	0.138178	0.360856	0.0468812	0.0344622
Chr3	7845200	7845400	0.10745	0.0852884	0.110644	0.150571	0.0809386	0.343586	0.00593972	0.0155782
Chr3	7856900	7857100	0.0920888	0.0609812	0.0306286	0.083168	0.0698783	0.320969	0	0.150086
Chr3	7924300	7924500	0.265899	0.222706	0.260428	0.239854	0.274267	0.350571	0.0819995	0.0244187
Chr3	7937000	7937600	0.478287	0.336239	0.420937	0.382788	0.530563	0.337677	0.081332	0.137202
Chr3	7979700	7979900	0.181636	0.165373	0.21005	0.125792	0.196961	0.169901	0.0289343	0.0598426
Chr3	7994900	7995100	0.525775	0.357843	0.587165	0.329622	0.545732	0.334125	0.0138889	0.0360421
Chr3	7995400	7995700	0.551372	0.456372	0.490728	0.382843	0.545715	0.241063	0.0448401	0.0341111
Chr3	8082000	8082200	0.286232	0.244941	0.31919	0.338871	0.338962	0.345875	0.0245395	0.0627886
Chr3	8101000	8101600	0.312739	0.298939	0.315966	0.329059	0.266291	0.484092	0.223812	0.184148
Chr3	8129800	8130000	0.0574277	0.0422185	0.1332	0.254969	0.15874	0.320091	0.0328908	0.00817923
Chr3	8188900	8189200	0.185319	0.124025	0.131516	0.262055	0.182669	0.284343	0.0225146	0.0527677
Chr3	8209500	8210100	0.292508	0.234181	0.234087	0.252226	0.266514	0.2944	0.0810497	0.0832218
Chr3	8231200	8231500	0.410839	0.295187	0.482262	0.332197	0.468869	0.297438	0.0832899	0.0554837
Chr3	8329200	8329500	0.480905	0.361257	0.487561	0.279767	0.444274	0.37817	0.114437	0.108393
Chr3	8345400	8345600	0.233927	0.124648	0.243412	0.204827	0.231269	0.376539	0.0119803	0.0345613
Chr3	8379800	8380000	0.124612	0.140424	0.146287	0.189754	0.220347	0.410423	0.00387501	0.0253408
Chr3	8425900	8426300	0.35278	0.217615	0.251599	0.25111	0.360021	0.326591	0.0536758	0.0650532
Chr3	8493200	8493400	0.468049	0.320502	0.402377	0.364273	0.341619	0.47011	0.148874	0.0850888
Chr3	8547200	8547400	0.0485604	0.0216801	0.0897507	0.0561651	0.141102	0.480301	0.0299984	0.0782084
Chr3	8596100	8596500	0.421527	0.280146	0.466964	0.340744	0.449127	0.308008	0.0125424	0.0793436
Chr3	8623600	8623900	0.114328	0.0567892	0.0673907	0.0789139	0.100733	0.339498	0.0557939	0.0774138
Chr3	8644500	8645500	0.274016	0.19212	0.341428	0.236545	0.300366	0.320123	0.0208432	0.0662657
Chr3	8659800	8660000	0.175357	0.0489455	0.0933695	0.145301	0.12709	0.294046	0.00933031	0.00985419
Chr3	8684400	8684600	0.05624	0.0599342	0.062911	0.147494	0.0573457	0.302434	0.0190481	0.0302826
Chr3	8684900	8685100	0.407456	0.318841	0.355966	0.391113	0.380553	0.394911	0.0386574	0.0672718
Chr3	8690200	8690600	0.0407025	0.037095	0.0561686	0.0250685	0.0488269	0.120493	0.00596295	0.00334723
Chr3	8742700	8742900	0.212692	0.191354	0.194075	0.129277	0.327238	0.330222	0.00277778	0.0308451
Chr3	8752200	8752400	0.311906	0.276491	0.324924	0.325478	0.277843	0.376423	0.137799	0.101025
Chr3	8757600	8757900	0.343024	0.235251	0.356392	0.287975	0.396287	0.406489	0.0262048	0.0811227
Chr3	8837000	8837200	0.327899	0.310971	0.290451	0.228571	0.274964	0.167041	0.0329722	0.0220198
Chr3	8874900	8875700	0.353745	0.215255	0.368029	0.192179	0.329746	0.262948	0.0376213	0.0507101
Chr3	8883300	8883800	0.324828	0.162639	0.267694	0.282642	0.351307	0.347641	0.0468086	0.0601761
Chr3	8944900	8945100	0.116191	0.062575	0.131819	0.194773	0.157636	0.338288	0.0106943	0.0577239
Chr3	8976900	8977300	0.102003	0.0585333	0.148862	0.15951	0.126655	0.211064	0.0233802	0.033502
Chr3	8985700	8985900	0.223165	0.23484	0.209904	0.347258	0.272571	0.435226	0.133895	0.0604653
Chr3	9256200	9256600	0.18858	0.12763	0.247002	0.167358	0.180576	0.30946	0.00783876	0.0381493
Chr3	9300200	9300400	0.0250775	0.0547341	0.0760386	0.132921	0.0381895	0.316278	0.0032967	0.00444444
Chr3	9322000	9322200	0.208387	0.0763182	0.200897	0.190447	0.0957574	0.143537	0.0428805	0.0221946
Chr3	9335200	9335400	0.204652	0.104261	0.237107	0.245375	0.311366	0.516851	0.155624	0.043202
Chr3	9361800	9362000	0.339593	0.185253	0.427422	0.266462	0.253257	0.328594	0.0184271	0.0881122
Chr3	9383800	9384000	0.437443	0.185926	0.381368	0.424076	0.517791	0.477675	0.0537879	0.136978
Chr3	9384400	9384600	0.448495	0.353289	0.373688	0.304638	0.337435	0.271605	0.0454613	0.0419956
Chr3	9385300	9385900	0.437366	0.344432	0.382307	0.349681	0.394893	0.125608	0.0173347	0.058672
Chr3	9406000	9406200	0.0421236	0.10219	0.0730722	0.0638937	0.0831621	0.293143	0.0230745	0.0359253
Chr3	9471200	9471400	0.06485	0.228728	0.143971	0.201292	0.18976	0.595583	0.0032175	0.0898082
Chr3	9474900	9475100	0.188365	0.132604	0.142643	0.247964	0.204497	0.277426	0.00778889	0.0532828
Chr3	9540400	9540600	0.467089	0.304208	0.431293	0.537481	0.525193	0.505315	0.0733352	0.0887534
Chr3	9541000	9541200	0.38663	0.279935	0.420605	0.349003	0.301456	0.25438	0.0282127	0.112173
Chr3	9558200	9559300	0.459585	0.306731	0.441188	0.269746	0.432345	0.279269	0.0356075	0.0703848
Chr3	9595400	9595700	0.0654635	0.0270631	0.0311375	0.0886449	0.0991019	0.367011	0.0136353	0.010101
Chr3	9608000	9608400	0.248547	0.136174	0.247051	0.183276	0.220855	0.435494	0.0970453	0.134165
Chr3	9610300	9610500	0.305137	0.204018	0.215012	0.183763	0.304254	0.395038	0.103894	0.124215
Chr3	9664700	9665500	0.523776	0.35349	0.496704	0.436953	0.488432	0.365178	0.0306044	0.0815374
Chr3	9682000	9682200	0.0530146	0.125283	0.0403073	0.0798256	0.191841	0.3271	0	0.0709106
Chr3	9692200	9692500	0.0595022	0.0518064	0.083805	0.0693286	0.0963215	0.287319	0.083712	0.126051
Chr3	9702900	9703100	0.122	0.0831641	0.113962	0.15676	0.133255	0.293374	0.0179457	0.0223719
Chr3	9723900	9724100	0.061827	0.125968	0.0873412	0.0692658	0.128363	0.41879	0.0202569	0.128383
Chr3	9736000	9736200	0.128507	0.0652252	0.0965688	0.150689	0.128876	0.305207	0.0679848	0.06641
Chr3	9737000	9737300	0.0799947	0.0550037	0.020829	0.0986808	0.0521111	0.160918	0.00732038	0.0116338
Chr3	9739700	9740300	0.60446	0.464827	0.651893	0.515028	0.542529	0.461804	0.148318	0.197878
Chr3	9769100	9769500	0.0832756	0.0767546	0.0772924	0.119522	0.0503368	0.347234	0.0349269	0.0370924
Chr3	9781400	9781700	0.344331	0.211558	0.152042	0.162929	0.258168	0.478741	0.113001	0.0494994
Chr3	9788100	9788300	0.205551	0.27972	0.217848	0.286753	0.181111	0.362187	0.129858	0.144487
Chr3	9808100	9809200	0.207743	0.184918	0.224221	0.194831	0.20748	0.31075	0.0850426	0.0808763
Chr3	9828700	9829400	0.203278	0.109456	0.188658	0.211574	0.226758	0.456996	0.0542429	0.0807526
Chr3	9890700	9891000	0.430567	0.392398	0.622458	0.512759	0.459096	0.282405	0.0442401	0.0598453
Chr3	9977000	9977400	0.164624	0.175863	0.202211	0.231556	0.134881	0.401242	0.0220652	0.0414054
Chr3	10008400	10008700	0.344409	0.229369	0.340647	0.317056	0.322796	0.372622	0.11057	0.0887717
Chr3	10031200	10031400	0.193654	0.166967	0.258693	0.155446	0.209305	0.460451	0.167397	0.0743663
Chr3	10049000	10049500	0.442873	0.329139	0.518696	0.366913	0.454768	0.316685	0.0370391	0.0428915
Chr3	10066300	10067100	0.446809	0.354219	0.449565	0.331704	0.370347	0.255968	0.0304756	0.0442976
Chr3	10114300	10114500	0.0824018	0.0529998	0.0476098	0.0620939	0.115103	0.173017	0.0188717	0.0276079
Chr3	10176700	10177900	0.166899	0.116773	0.205529	0.177401	0.190265	0.237433	0.0350651	0.059094
Chr3	10190800	10191000	0.212208	0.123967	0.224496	0.272587	0.172574	0.28119	0.0260965	0.0564519
Chr3	10253700	10253900	0.015737	0.0181211	0.0162486	0.038952	0.00525362	0.239226	0.0318621	0.0132072
Chr3	10254900	10255100	0.0892658	0.0348849	0.0393981	0.114747	0.0834366	0.330712	0.01963	0.0181229
Chr3	10262300	10262700	0.183789	0.113334	0.161679	0.153574	0.120225	0.308152	0.0751947	0.0811778
Chr3	10263800	10264000	0.0676683	0.19524	0.0354245	0.0794122	0.337963	0.367392	0.0628293	0.148284
Chr3	10284200	10284400	0.071723	0.0892487	0.120721	0.19843	0.175911	0.425038	0.0214128	0.0401112
Chr3	10293900	10294400	0.35217	0.145597	0.298094	0.25078	0.361244	0.253698	0.0504998	0.102457
Chr3	10320600	10321000	0.495877	0.392248	0.485087	0.39973	0.589065	0.29155	0.0335874	0.0501122
Chr3	10339700	10339900	0.0733865	0.0346946	0.0635421	0.135514	0.0532695	0.265477	0.0737465	0.0492282
Chr3	10417400	10417600	0.1379	0.139257	0.114266	0.119616	0.21073	0.11723	0.0014245	0.0320155
Chr3	10434200	10434400	0.0387763	0.0558803	0.0338494	0.159022	0.110174	0.406619	0.0838627	0.0683709
Chr3	10441300	10441600	0.193059	0.202915	0.0689141	0.0864526	0.205013	0.356661	0.0369398	0.0259977
Chr3	10461600	10461800	0.18558	0.0852151	0.194099	0.142973	0.139888	0.487057	0.117824	0.127124
Chr3	10464900	10465100	0.057113	0.0426307	0.0368274	0.138623	0.0509348	0.264176	0.0291866	0.0113997
Chr3	10509600	10510000	0.212949	0.201529	0.30534	0.271566	0.310202	0.225862	0.0157867	0.0166667
Chr3	10514100	10514400	0.0639091	0.0547641	0.0748631	0.114501	0.0422777	0.485158	0.0153832	0.0349798
Chr3	10517600	10517900	0.192562	0.143965	0.306273	0.332935	0.28421	0.553464	0.03149	0.0615688
Chr3	10532000	10532200	0.0448556	0.106379	0.0881209	0.170163	0.113578	0.3231	0.0610952	0.0390555
Chr3	10574900	10575100	0.447656	0.292623	0.4323	0.347577	0.41498	0.225372	0.0260729	0.0474693
Chr3	10585800	10586000	0.267165	0.21947	0.243503	0.233542	0.23731	0.29032	0.0190301	0.0345415
Chr3	10593300	10593600	0.122817	0.0772391	0.0642023	0.0768329	0.144736	0.279436	0.0291044	0.0207619
Chr3	10599300	10599500	0.00724987	0.0180851	0.0386146	0.0491844	0.0974895	0.217281	0.00388382	0.00177305
Chr3	10666600	10666900	0.277672	0.177388	0.252166	0.274813	0.219049	0.406985	0.0619768	0.0699959
Chr3	10681700	10682000	0.341766	0.249775	0.415495	0.396926	0.458773	0.369562	0.0618964	0.120703
Chr3	10717800	10718400	0.484764	0.42976	0.590819	0.425311	0.454968	0.314649	0.091456	0.106455
Chr3	10752000	10752300	0.0585615	0.0396771	0.167316	0.0550803	0.0874258	0.199793	0.0436357	0.0602968
Chr3	10752900	10753400	0.0340784	0.053587	0.0277989	0.091959	0.0281951	0.215834	0.0163291	0.0337253
Chr3	10758000	10758600	0.457619	0.350304	0.540553	0.441659	0.53056	0.300268	0.0844221	0.0544122
Chr3	10764200	10764400	0.204085	0.0853084	0.170426	0.149236	0.171457	0.241917	0.0182775	0.0423096
Chr3	10781400	10781600	0.0778424	0.0355589	0.00705701	0.0923035	0.140612	0.343818	0.0276809	0.0795803
Chr3	10791100	10791500	0.299581	0.175783	0.349866	0.25727	0.325402	0.227008	0.0363276	0.030878
Chr3	10840400	10840600	0.205444	0.173982	0.199348	0.159138	0.300721	0.495219	0.129129	0.0502845
Chr3	10902200	10902400	0.0508456	0.0331065	0.0716309	0.107024	0.0856586	0.348527	0.00997925	0.0311283
Chr3	10908200	10908500	0.25883	0.160686	0.301629	0.22982	0.350971	0.215478	0.0118407	0.0268148
Chr3	10937900	10938200	0.302426	0.254738	0.253811	0.128681	0.387816	0.378534	0.0392517	0.144804
Chr3	10950400	10950600	0.0627912	0.0458128	0.0487894	0.136015	0.110423	0.256329	0.00103199	0.0185363
Chr3	10961000	10961200	0.108459	0.0363904	0.121672	0.113948	0.101025	0.184291	0	0.11694
Chr3	10970100	10970300	0.0382555	0.0800412	0.0202868	0.0283597	0.0408605	0.23557	0.0889969	0.11091
Chr3	10977600	10977800	0.312649	0.323986	0.37929	0.315714	0.270265	0.185951	0.0166667	0.0197315
Chr3	10980500	10980700	0.245416	0.218571	0.295703	0.205344	0.267201	0.43163	0.181714	0.236213
Chr3	11021900	11022700	0.168583	0.14774	0.181939	0.164235	0.18526	0.225672	0.0820336	0.0797719
Chr3	11036400	11036700	0.0849167	0.0798065	0.188539	0.15201	0.192668	0.247822	0.0643338	0.0485245
Chr3	11054800	11055100	0.445083	0.359364	0.593348	0.435982	0.472778	0.26444	0.069284	0.104914
Chr3	11077800	11078000	0.128565	0.0594635	0.0504633	0.0924824	0.0554839	0.284246	0.0018315	0.0583944
Chr3	11097200	11097400	0.0785708	0.064904	0.02604	0.0523425	0.0427142	0.145329	0.0612098	0.00720489
Chr3	11104900	11105100	0.0530901	0.0485618	0.0492465	0.0782048	0.126284	0.13842	0.0362332	0.026396
Chr3	11132200	11132400	0.56069	0.37037	0.572748	0.447952	0.545069	0.33645	0.0440603	0.0834369
Chr3	11140900	11141100	0.145376	0.0982702	0.0947978	0.252387	0.11604	0.223739	0.0244167	0.0115616
Chr3	11141600	11141800	0.115904	0.0700753	0.134956	0.164556	0.0815691	0.390918	0.00558785	0.0625405
Chr3	11157800	11158000	0.0831191	0.116524	0.0722107	0.108838	0.0883458	0.240198	0.100438	0.0260004
Chr3	11162700	11163000	0.221952	0.194095	0.223723	0.162404	0.243576	0.40707	0.14492	0.0639066
Chr3	11181400	11181600	0.293554	0.417293	0.406984	0.187586	0.298028	0.440464	0.0710123	0.0854967
Chr3	11215400	11215600	0.16839	0.102357	0.185669	0.198577	0.147932	0.365076	0.0701097	0.0793261
Chr3	11279400	11279600	0.101268	0.0638121	0.0850555	0.124862	0.123535	0.216092	0.0380004	0.0161582
Chr3	11286700	11287100	0.42594	0.25352	0.339692	0.336624	0.335602	0.232316	0.0125643	0.0226264
Chr3	11296500	11296700	0.179603	0.175009	0.237153	0.391654	0.380974	0.439657	0.0297946	0.0305556
Chr3	11397000	11397200	0.2588	0.188588	0.361243	0.213467	0.2861	0.181661	0.0177544	0.0390615
Chr3	11481600	11481900	0.0557914	0.0565069	0.0612944	0.0778033	0.0735664	0.335122	0.0393567	0.126953
Chr3	11602500	11602700	0.250055	0.19412	0.230324	0.274593	0.162135	0.573244	0.0584439	0.11227
Chr3	11657900	11658300	0.166508	0.177077	0.202765	0.164777	0.23426	0.307032	0.0609838	0.0581583
Chr3	11741300	11741500	0.249739	0.308636	0.397154	0.250118	0.346042	0.286563	0.0695585	0.161921
Chr3	11798300	11798500	0.0889546	0.117642	0.113044	0.0850328	0.149323	0.449629	0.0700878	0.0992351
Chr3	11802900	11803100	0.0444927	0.0423249	0.0908077	0.0728721	0.0695445	0.268644	0.00580065	0.0245221
Chr3	11968200	11968500	0.455504	0.246754	0.439717	0.466568	0.467012	0.227143	0.0449658	0.0250818
Chr3	11972100	11972600	0.112709	0.0678031	0.0701403	0.10497	0.0975989	0.317599	0.0297734	0.0486791
Chr3	12126700	12126900	0.0168591	0.0250222	0.0929149	0.106763	0.0517527	0.337002	0.0204087	0.0305105
Chr3	12353200	12353400	0.348317	0.216567	0.199199	0.267024	0.377458	0.440649	0.0452646	0.056182
Chr3	12359300	12359500	0.29742	0.162587	0.487563	0.302207	0.287598	0.475764	0.0165958	0.161843
Chr3	12455100	12455300	0.0751526	0.070782	0.0782286	0.0659724	0.0797778	0.27346	0.0381158	0.0416709
Chr3	12473600	12473800	0.0165528	0.0628835	0.11417	0.0700179	0.0348373	0.27779	0.0468641	0.0507557
Chr3	12558800	12559100	0.228364	0.0948762	0.143034	0.234646	0.165081	0.301185	0.0131132	0.0491578
Chr3	14084300	14084500	0.382827	0.301889	0.343171	0.299353	0.323814	0.388393	0.0645611	0.0456013
Chr3	14096000	14096200	0.197658	0.149006	0.179837	0.290803	0.187772	0.353711	0.0777217	0.0623518
Chr3	14949600	14949800	0.0228516	0.0290346	0.0289525	0.0498192	0.0563263	0.360019	0.0599998	0.0976132
Chr3	15078200	15078400	0.13165	0.0648339	0.129215	0.0179766	0.072894	0.477408	0.0203704	0.262085
Chr3	15188300	15188500	0.413697	0.234875	0.531969	0.281632	0.395825	0.429045	0.0743072	0.0912166
Chr3	15189900	15190100	0.238635	0.0735758	0.112647	0.0557246	0.114934	0.316403	0.004	0.0304037
Chr3	15221800	15222000	0.0736193	0.0606964	0.068375	0.138841	0.107892	0.352598	0.00383753	0.0287827
Chr3	15226000	15226200	0.0719695	0.0713502	0.0812832	0.116041	0.0696147	0.328358	0.0303099	0.0529562
Chr3	15233300	15233500	0.045568	0.0452404	0.0676829	0.0789329	0.0618283	0.37708	0.0422649	0.0401397
Chr3	15271000	15271600	0.284539	0.221263	0.299992	0.234619	0.338411	0.31799	0.110653	0.11708
Chr3	15371800	15372300	0.170292	0.197904	0.190844	0.147343	0.164805	0.287095	0.0836874	0.146209
Chr3	15436000	15436200	0.570152	0.492289	0.446703	0.615925	0.443341	0.357722	0.0456883	0.0411845
Chr3	15666900	15667500	0.100883	0.0718872	0.197527	0.150772	0.191384	0.21798	0.0316345	0.0374165
Chr3	15780600	15780800	0.0376614	0.0501721	0.10216	0.15408	0.0968729	0.276024	0.0350396	0.00912652
Chr3	15818000	15818200	0.543344	0.48672	0.626375	0.39546	0.517098	0.353198	0.128462	0.0439224
Chr3	15880400	15880600	0.250072	0.0908837	0.37668	0.421623	0.200858	0.331215	0.0116487	0.083056
Chr3	15915800	15916000	0.0381869	0.0677364	0.0472199	0.152527	0.0987262	0.404517	0.0149837	0.0848876
Chr3	15926900	15927500	0.146735	0.133948	0.152313	0.157082	0.235875	0.167279	0.0174823	0.0223433
Chr3	16052300	16052600	0.111468	0.230479	0.101278	0.0912295	0.225335	0.280031	0.00494135	0.0215178
Chr3	16066900	16067100	0.581333	0.516151	0.642405	0.495605	0.512117	0.49259	0.284213	0.149673
Chr3	16071900	16072100	0.0593632	0.0185271	0.0729338	0.0482183	0.0444625	0.444768	0.0166919	0.0174681
Chr3	16090100	16090300	0.0640431	0.0422165	0.165653	0.12741	0.0578404	0.253269	0.0140364	0.0514194
Chr3	16100800	16101000	0.388361	0.388338	0.48013	0.451588	0.37763	0.431911	0.132762	0.102195
Chr3	16114300	16114600	0.0916282	0.0715385	0.0721916	0.115207	0.0885228	0.314577	0.0333355	0.0402671
Chr3	16186000	16186200	0.262082	0.213962	0.343004	0.185731	0.293468	0.402953	0.0705978	0.05094
Chr3	16187600	16187900	0.175466	0.0805804	0.130219	0.158762	0.206667	0.52114	0.0287275	0.0839102
Chr3	16193200	16193400	0.210786	0.172038	0.261551	0.172683	0.248245	0.53802	0.00818714	0.0358199
Chr3	16201400	16201700	0.0503728	0.0519272	0.0752825	0.0670777	0.0690886	0.225825	0.0316596	0.0387202
Chr3	16204900	16205200	0.104444	0.0742965	0.0704003	0.259958	0.113856	0.398298	0.0135039	0.0112408
Chr3	16221700	16222300	0.0743982	0.0926513	0.0622584	0.0698389	0.0888675	0.166953	0.0204002	0.0483824
Chr3	16241400	16241800	0.100241	0.104118	0.192429	0.149316	0.142247	0.19633	0.0516076	0.0732924
Chr3	16269500	16269900	0.398238	0.263003	0.316809	0.345394	0.358648	0.393554	0.147074	0.123073
Chr3	16293500	16294100	0.0869135	0.067689	0.0777216	0.0873583	0.0928541	0.230383	0.0260906	0.0297004
Chr3	16302800	16303100	0.114695	0.0649548	0.114726	0.151853	0.111577	0.437671	0.00909563	0.0356537
Chr3	16341600	16341900	0.477961	0.422202	0.452494	0.435743	0.291264	0.443026	0.208957	0.185268
Chr3	16395700	16395900	0.0951142	0.074936	0.102147	0.131243	0.105343	0.244014	0.0188577	0.0220392
Chr3	16405200	16405500	0.572156	0.359287	0.422135	0.298476	0.363736	0.299059	0.050385	0.0152036
Chr3	16416800	16417000	0.180876	0.16864	0.263051	0.32848	0.336763	0.545985	0.0612855	0.0320256
Chr3	16471100	16471300	0.0146074	0.0467796	0.0229362	0.111024	0.096057	0.569994	0.00854703	0.0562433
Chr3	16485300	16485900	0.496831	0.331373	0.47843	0.381238	0.487297	0.19922	0.0484147	0.0481221
Chr3	16534400	16534600	0.515018	0.360931	0.448093	0.384944	0.434325	0.417208	0.128865	0.0413133
Chr3	16539400	16539600	0.116881	0.129695	0.111739	0.187412	0.0864169	0.472753	0.0217306	0.0147355
Chr3	16553300	16553500	0.257293	0.261568	0.30879	0.27693	0.293079	0.409893	0.0860933	0.0662967
Chr3	16562800	16563000	0.472995	0.421342	0.611683	0.490037	0.574161	0.289211	0	0.0349643
Chr3	16669700	16669900	0.0867586	0.165277	0.0998458	0.143178	0.0506716	0.195807	0.0229668	0.0394877
Chr3	16678200	16678500	0.333026	0.365647	0.297094	0.407312	0.419	0.250735	0.0880336	0.0927294
Chr3	16682000	16682400	0.0723657	0.0994862	0.118835	0.178172	0.0815812	0.191952	0.026762	0.0305591
Chr3	16699100	16699400	0.242258	0.27713	0.156633	0.220285	0.179764	0.264012	0.0719269	0.127186
Chr3	16700100	16700500	0.335993	0.211099	0.235023	0.175115	0.226473	0.381376	0.0552195	0.0890014
Chr3	16737600	16737800	0.222507	0.159276	0.346294	0.227762	0.186279	0.359997	0.0206841	0.0698311
Chr3	16787600	16788000	0.439361	0.392652	0.376759	0.325693	0.424557	0.531028	0.196394	0.202069
Chr3	16798000	16798400	0.047318	0.0428035	0.0288192	0.0555951	0.0498794	0.246419	0.00866358	0.0147618
Chr3	16809200	16809400	0.106356	0.0766928	0.112871	0.0802809	0.0975942	0.247975	0.127358	0.165583
Chr3	16814000	16814300	0.0540812	0.0682889	0.084303	0.13262	0.0741475	0.316755	0.037455	0.0516989
Chr3	16877900	16878100	0.421878	0.335803	0.349811	0.343197	0.431386	0.29174	0.0318875	0.0646967
Chr3	16989700	16989900	0.271301	0.261035	0.43593	0.384057	0.321094	0.56189	0.222947	0.0843772
Chr3	16993400	16993600	0.015493	0.0241291	0.0285192	0.0667505	0.0453916	0.209058	0.0159742	0.0141862
Chr3	16995700	16995900	0.0555153	0.0700552	0.0931222	0.134152	0.0778587	0.276404	0.0148148	0.0488331
Chr3	17048000	17048600	0.172	0.10367	0.161024	0.146022	0.220979	0.296802	0.0531693	0.0687491
Chr3	17087100	17087400	0.139762	0.129148	0.127087	0.288826	0.118918	0.36616	0.00479211	0.0946733
Chr3	17117400	17117700	0.0769057	0.0714599	0.0840301	0.111631	0.0657939	0.265903	0.0131654	0.0441071
Chr3	17141600	17141800	0.291085	0.288709	0.37451	0.313277	0.158142	0.283751	0.0151377	0.143391
Chr3	17143700	17144000	0.579484	0.399047	0.519307	0.522769	0.541904	0.106934	0.0113379	0.123813
Chr3	17147100	17147500	0.142284	0.0819644	0.194048	0.14691	0.13925	0.284007	0.00602103	0.0280651
Chr3	17150200	17150800	0.417262	0.244602	0.418898	0.268849	0.383007	0.383694	0.0580405	0.0835164
Chr3	17177300	17177500	0.0839352	0.043732	0.0585871	0.0863551	0.086169	0.335147	0.0389763	0.0258256
Chr3	17178400	17178600	0.135818	0.121045	0.137329	0.16295	0.133635	0.35318	0.0534796	0.139015
Chr3	17203700	17204000	0.301663	0.304176	0.336588	0.274202	0.394134	0.318552	0.0640062	0.108125
Chr3	17227000	17227200	0.155136	0.0821697	0.140775	0.143672	0.151117	0.318984	0.0433103	0.0714687
Chr3	17249400	17249600	0.0206171	0.0618552	0.0575233	0.12298	0.0535615	0.220317	0.0174334	0.0156564
Chr3	17270400	17270800	0.158965	0.124613	0.216215	0.169682	0.241642	0.257392	0.0272597	0.0422077
Chr3	17277200	17277400	0.559375	0.194637	0.456615	0.243	0.401005	0.155085	0.0178571	0.0839335
Chr3	17299400	17300800	0.518569	0.387455	0.516828	0.414617	0.455756	0.191898	0.037537	0.0681428
Chr3	17311000	17311200	0.144208	0.223902	0.277986	0.46603	0.296324	0.474275	0	0.0907552
Chr3	17332400	17332600	0.0690126	0.0316176	0.0638324	0.0997582	0.0531546	0.328245	0.00345679	0.0197546
Chr3	17363100	17363300	0.516305	0.422052	0.613191	0.483527	0.425711	0.510027	0.153308	0.113178
Chr3	17383500	17383700	0.258579	0.291687	0.40686	0.399508	0.333079	0.330016	0.069486	0.0713093
Chr3	17396000	17396400	0.25888	0.216214	0.342168	0.154347	0.197779	0.200036	0.0217661	0.101677
Chr3	17396800	17397000	0.354994	0.312648	0.381469	0.386534	0.341809	0.24449	0.0525451	0.0358809
Chr3	17402000	17402700	0.412984	0.361482	0.506594	0.342994	0.463858	0.410751	0.150085	0.124935
Chr3	17417600	17418000	0.36442	0.247868	0.37151	0.271706	0.422822	0.452097	0.199912	0.252771
Chr3	17429700	17429900	0.359861	0.341706	0.313076	0.310176	0.30056	0.363367	0.118938	0.147483
Chr3	17432700	17433100	0.16158	0.0805921	0.159556	0.186887	0.178425	0.275293	0.123855	0.207128
Chr3	17437100	17437300	0.0597966	0.112527	0.132304	0.132837	0.118142	0.137792	0.0596356	0.106283
Chr3	17516700	17516900	0.100817	0.0827225	0.115423	0.156734	0.0914149	0.493971	0.00993279	0.029171
Chr3	17566700	17566900	0.262503	0.22108	0.330246	0.260397	0.249614	0.531571	0.0691565	0.0677527
Chr3	17639800	17640600	0.156787	0.104648	0.153692	0.19628	0.133313	0.317611	0.0267631	0.0781419
Chr3	17656300	17656600	0.263579	0.295827	0.386677	0.299552	0.349377	0.344792	0.0667656	0.05251
Chr3	17658700	17659000	0.251335	0.299095	0.327355	0.325465	0.245402	0.362016	0.066728	0.0422755
Chr3	17728600	17728900	0.347421	0.311336	0.371612	0.511075	0.482922	0.326784	0.03594	0.0464482
Chr3	17730400	17730600	0.580879	0.451167	0.569405	0.434085	0.622419	0.403715	0.0565058	0.160777
Chr3	17731000	17731200	0.589338	0.328423	0.517917	0.553346	0.574588	0.358761	0.0579652	0.164151
Chr3	17777300	17777500	0.50833	0.377668	0.544627	0.420358	0.544887	0.311061	0.070673	0.0305103
Chr3	17899300	17899600	0.101693	0.121091	0.180949	0.187037	0.218442	0.332239	0.0102492	0.0157244
Chr3	17928500	17928700	0.0569318	0.0603108	0.140552	0.10387	0.101918	0.326806	0.0353887	0.0454827
Chr3	17986400	17986600	0.18775	0.185056	0.254396	0.221584	0.286934	0.22567	0.0685311	0.0392783
Chr3	18018800	18019400	0.466306	0.384242	0.500577	0.432011	0.537941	0.277102	0.0284463	0.0418632
Chr3	18019700	18019900	0.549018	0.361827	0.521014	0.329194	0.540323	0.296663	0.0243961	0.0682512
Chr3	18062500	18062800	0.19081	0.131993	0.183863	0.219385	0.245314	0.406762	0.00924366	0.0322689
Chr3	18069300	18069600	0.123593	0.0706076	0.164636	0.138419	0.0685083	0.338089	0.0156422	0.00780423
Chr3	18070200	18070400	0.200519	0.191716	0.332127	0.37541	0.258852	0.571358	0.0441311	0.0228285
Chr3	18088600	18088800	0.442772	0.288865	0.413479	0.339805	0.29152	0.45356	0.062373	0.0689778
Chr3	18171000	18171300	0.473995	0.399115	0.432626	0.430996	0.471347	0.248852	0.0435651	0.0641895
Chr3	18172300	18172800	0.284903	0.156953	0.270978	0.248882	0.296019	0.229717	0.0141192	0.0610767
Chr3	18180000	18180500	0.143448	0.111786	0.223386	0.156395	0.154307	0.160584	0.0259819	0.0186695
Chr3	18243800	18244000	0.245688	0.264169	0.352326	0.243719	0.287973	0.336796	0.0899408	0.0525034
Chr3	18268400	18268700	0.0481945	0.142146	0.0819336	0.179742	0.139283	0.462354	0.00528017	0.00242598
Chr3	18271100	18271300	0.0649375	0.0592613	0.0469613	0.0997688	0.1551	0.199205	0.0182602	0.0439404
Chr3	18308800	18309200	0.240129	0.151495	0.319837	0.260283	0.243242	0.29617	0.0937718	0.0608868
Chr3	18310500	18310900	0.0464435	0.0248212	0.0746496	0.143688	0.0208624	0.208332	0.00446154	0.0160773
Chr3	18412500	18412700	0.532296	0.411779	0.593131	0.499542	0.52317	0.293521	0.0469722	0.0238029
Chr3	18413000	18413200	0.602661	0.321357	0.436713	0.429831	0.596865	0.420303	0.0450113	0.0878729
Chr3	18458200	18458900	0.206822	0.121563	0.159053	0.197061	0.203	0.302232	0.048864	0.0703935
Chr3	18495200	18495400	0.548918	0.357954	0.404736	0.568309	0.505545	0.277136	0.031498	0.0857739
Chr3	18544000	18544200	0.145929	0.0627462	0.132808	0.0726315	0.167073	0.357486	0.0936187	0.212259
Chr3	18569500	18569700	0.147104	0.243442	0.108424	0.275127	0.172182	0.580929	0.00427351	0.00666667
Chr3	18584700	18585300	0.308957	0.242105	0.344123	0.275425	0.312467	0.161408	0.0253583	0.0681411
Chr3	18617000	18617200	0.0192764	0.0333514	0.0472429	0.087713	0.0615321	0.143893	0.00980376	0.0397516
Chr3	18629700	18630100	0.254516	0.18285	0.312961	0.244965	0.270778	0.332822	0.00450794	0.00916042
Chr3	18631100	18632200	0.242764	0.196052	0.257953	0.193224	0.195612	0.208504	0.0741949	0.094134
Chr3	18633900	18634500	0.501502	0.324947	0.533235	0.467842	0.459396	0.437838	0.0645234	0.0806409
Chr3	18652100	18652300	0.259711	0.170297	0.306342	0.248785	0.349802	0.448846	0.0961166	0.127994
Chr3	18652900	18653100	0.242948	0.0763365	0.219922	0.263641	0.225079	0.351739	0.127498	0.143261
Chr3	18654700	18655100	0.0809963	0.0509609	0.114058	0.14279	0.0599753	0.39671	0.0812376	0.075193
Chr3	18734200	18734500	0.398467	0.33502	0.47279	0.405302	0.402348	0.443229	0.176447	0.192382
Chr3	18757200	18757500	0.106815	0.0684717	0.107578	0.114863	0.126135	0.203578	0.0295988	0.0430619
Chr3	18843500	18844500	0.0980639	0.0924391	0.0887144	0.0799562	0.0715658	0.279703	0.0215897	0.077963
Chr3	18860000	18860300	0.210611	0.106291	0.137182	0.137671	0.0845008	0.420143	0.0061191	0.0323143
Chr3	18860900	18861200	0.171738	0.119123	0.122153	0.198542	0.200973	0.349927	0.0142666	0.0826939
Chr3	18873600	18873900	0.209321	0.18075	0.266998	0.3223	0.335641	0.68854	0.0321428	0.0265595
Chr3	18887100	18887300	0.123913	0.0838042	0.176346	0.136187	0.20854	0.207288	0.0318873	0.11063
Chr3	18896000	18896200	0.0156838	0.0652775	0.0621406	0.136893	0.029485	0.159813	0.00876623	0.00591016
Chr3	18928400	18928800	0.215998	0.235135	0.232762	0.139066	0.307726	0.262627	0.0433648	0.0683305
Chr3	18948300	18948500	0.370494	0.239971	0.364231	0.297095	0.351312	0.246766	0.00568768	0.0632874
Chr3	18976700	18977100	0.381054	0.275044	0.358483	0.228661	0.49277	0.364275	0.0499104	0.0992202
Chr3	19133900	19134200	0.344269	0.168338	0.250679	0.200921	0.391477	0.286634	0.0774461	0.0740654
Chr3	19134600	19134900	0.180601	0.137347	0.115546	0.201125	0.186365	0.223404	0.0722733	0.0311153
Chr3	19178400	19179000	0.232852	0.122454	0.240391	0.200545	0.228275	0.125582	0.0125816	0.0358814
Chr3	19242800	19243200	0.576267	0.571145	0.61364	0.501603	0.577185	0.466935	0.17399	0.215534
Chr3	19243500	19243800	0.610661	0.60909	0.614149	0.628792	0.637845	0.577782	0.323033	0.241448
Chr3	19428000	19428200	0.331211	0.289572	0.402677	0.388224	0.345203	0.28271	0.0509506	0.0181597
Chr3	19429000	19429200	0.292377	0.209842	0.338384	0.258412	0.249215	0.305524	0.0178742	0.029163
Chr3	19436900	19437500	0.481201	0.377142	0.570252	0.399597	0.47588	0.305157	0.0632062	0.0671628
Chr3	19464800	19465100	0.182125	0.177665	0.231887	0.142841	0.191256	0.312157	0.0214057	0.019846
Chr3	19520600	19521100	0.493463	0.31415	0.535802	0.368077	0.485633	0.381137	0.0906987	0.115832
Chr3	19529500	19529800	0.545797	0.362441	0.431853	0.453848	0.505324	0.405438	0.0799806	0.0808171
Chr3	19621900	19622300	0.244946	0.209034	0.399584	0.325675	0.367381	0.302477	0.0860661	0.102176
Chr3	19623200	19623400	0.268825	0.149765	0.309939	0.24927	0.265342	0.334519	0.0172153	0.0533699
Chr3	19648300	19648500	0.443647	0.295441	0.334871	0.421197	0.342392	0.112748	0.0204861	0.00607449
Chr3	19739700	19740300	0.467121	0.368375	0.549215	0.391089	0.489206	0.34999	0.0861404	0.161478
Chr3	19753800	19754000	0.0545964	0.0588957	0.0656515	0.111129	0.0472576	0.20527	0.00483011	0.0234518
Chr3	19766100	19766300	0.13183	0.139265	0.138701	0.233215	0.159771	0.320069	0.0208243	0.0461641
Chr3	20024200	20024600	0.110618	0.0927521	0.087407	0.141965	0.101983	0.203215	0.00897493	0.033826
Chr3	20090300	20090800	0.189129	0.135703	0.169212	0.172632	0.162411	0.34425	0.0621907	0.0473785
Chr3	20144000	20144300	0.183736	0.112523	0.27929	0.282229	0.258639	0.506147	0.00396825	0.0284616
Chr3	20189200	20189400	0.293568	0.147651	0.237036	0.132732	0.280687	0.412906	0.111056	0.161421
Chr3	20233500	20233900	0.308529	0.241698	0.359704	0.310528	0.350121	0.298118	0.116558	0.0632732
Chr3	20260200	20260500	0.061844	0.0383606	0.0624668	0.0992397	0.039774	0.440559	0.0347674	0.0311242
Chr3	20304700	20304900	0.223312	0.280193	0.353517	0.22536	0.166626	0.397322	0.1286	0.142761
Chr3	20330200	20330400	0.373774	0.264384	0.44755	0.414492	0.451188	0.659273	0.0758143	0.118315
Chr3	20349400	20349800	0.0451911	0.0466782	0.0366299	0.0583103	0.0596985	0.217498	0.010754	0.00850794
Chr3	20483900	20484400	0.376773	0.285792	0.387933	0.250087	0.43043	0.199891	0.0352367	0.0517398
Chr3	20485700	20486000	0.148584	0.138254	0.187379	0.167591	0.20971	0.234807	0.0486662	0.0971544
Chr3	20629700	20630000	0.124194	0.0805039	0.21121	0.298614	0.185511	0.597946	0.0641327	0.0943934
Chr3	20655900	20656100	0.192234	0.0883217	0.319481	0.172082	0.184705	0.25296	0.0773112	0.104047
Chr3	20660400	20660600	0.0377634	0.0296655	0.0424697	0.0441794	0.0545317	0.0777747	0	0.0191149
Chr3	20726100	20726400	0.270478	0.231598	0.287881	0.305741	0.291159	0.401387	0.103597	0.117243
Chr3	20763800	20764000	0.376117	0.333428	0.336662	0.332986	0.339266	0.185068	0.0284391	0.0282635
Chr3	20764300	20764500	0.259671	0.103933	0.305132	0.154282	0.425918	0.464462	0.0466406	0.0550824
Chr3	20769600	20769800	0.626433	0.453902	0.60297	0.526478	0.473497	0.444575	0.104632	0.281649
Chr3	20770300	20770500	0.361875	0.25681	0.313947	0.316958	0.355465	0.383083	0.0286921	0.144486
Chr3	20786400	20787000	0.320138	0.269972	0.35222	0.291823	0.40805	0.103266	0.014697	0.038962
Chr3	20787600	20787800	0.545941	0.314176	0.507435	0.407091	0.520111	0.275838	0.042207	0.0508356
Chr3	20876200	20876500	0.307386	0.207672	0.373329	0.239963	0.36542	0.291376	0.0372008	0.0676948
Chr3	20957800	20958000	0.121773	0.054665	0.148002	0.115015	0.0741574	0.280026	0.026424	0.0329645
Chr3	20990700	20991100	0.0490453	0.0362108	0.0624025	0.0738053	0.0616717	0.289784	0.06322	0.045499
Chr3	21008400	21008700	0.115338	0.116206	0.165131	0.1357	0.107184	0.406559	0.0680643	0.0848079
Chr3	21026300	21026600	0.147499	0.082269	0.132133	0.209218	0.158146	0.506085	0.00476811	0.0368472
Chr3	21109200	21109400	0.304144	0.265601	0.576491	0.35629	0.326562	0.523662	0.122432	0.177224
Chr3	21130500	21130700	0.187294	0.169673	0.191392	0.26235	0.22309	0.35916	0.0520742	0.0632043
Chr3	21413200	21413600	0.14792	0.0500953	0.192641	0.258123	0.180943	0.373128	0.00664215	0.0188769
Chr3	21436300	21436600	0.167139	0.0909915	0.164975	0.143987	0.145255	0.317056	0.0253559	0.0779682
Chr3	21552100	21552700	0.407239	0.289859	0.422187	0.397498	0.325935	0.267048	0.105207	0.0814606
Chr3	21608400	21608700	0.0758152	0.0679283	0.0700988	0.139826	0.137037	0.132982	0.014871	0.045946
Chr3	21616800	21617000	0.576825	0.445235	0.507138	0.37789	0.493356	0.587354	0.106797	0.223205
Chr3	21694100	21694900	0.20305	0.220883	0.254887	0.252619	0.232701	0.29901	0.0507783	0.0481357
Chr3	21883300	21883500	0.186212	0.158881	0.181269	0.211117	0.208512	0.41511	0.113814	0.0848474
Chr3	22057900	22058200	0.0852466	0.0337893	0.0631291	0.145742	0.148903	0.281976	0.00871795	0.0341636
Chr3	22059600	22059900	0.238479	0.213868	0.246593	0.302385	0.284178	0.330895	0.028304	0.145106
Chr3	22113000	22113400	0.154526	0.18506	0.202671	0.193685	0.202808	0.317582	0.123937	0.105411
Chr3	22115400	22115700	0.148003	0.12753	0.211916	0.16759	0.223358	0.406182	0.0971918	0.0840204
Chr3	22118900	22119600	0.516223	0.440671	0.568686	0.474512	0.386225	0.240309	0.0265817	0.0792033
Chr3	22120400	22120600	0.549586	0.435346	0.500401	0.377953	0.529603	0.248813	0.0424242	0.064108
Chr3	22214600	22214800	0.095817	0.103585	0.146602	0.184716	0.175258	0.424958	0.031352	0.0298895
Chr3	22215300	22216000	0.420199	0.247745	0.377496	0.281871	0.348038	0.345155	0.0317869	0.0486131
Chr3	22370200	22370700	0.038893	0.0619234	0.0672172	0.122564	0.0994244	0.338105	0.0056599	0.00868023
Chr3	22372100	22372300	0.0465717	0.0697787	0.0438088	0.0920253	0.0554768	0.361123	0.0320622	0.017242
Chr3	22372800	22373000	0.0650547	0.0926565	0.0518162	0.0836381	0.125322	0.384116	0.0178111	0.0126139
Chr3	22378100	22378300	0.108022	0.0671514	0.0340463	0.127155	0.0804504	0.3287	0.0229387	0.0120671
Chr3	22562700	22562900	0.104052	0.11401	0.0702171	0.151905	0.122432	0.224972	0.0162467	0.0111153
Chr3	22660300	22660500	0.138834	0.156722	0.193976	0.239828	0.148426	0.518945	0.0839432	0.112329
Chr3	22695600	22695800	0.303997	0.234941	0.227137	0.235049	0.165598	0.544955	0.0528551	0.0848837
Chr3	22700300	22700500	0.178484	0.193595	0.299484	0.250736	0.537693	0.306695	0.032139	0.0564247
Chr3	22932000	22932200	0.0840702	0.0521292	0.0632177	0.0858378	0.0398826	0.213813	0.0186147	0.00503472
Chr3	23085500	23086100	0.564888	0.416177	0.605879	0.52613	0.558592	0.33006	0.0472925	0.0774509
Chr3	23108800	23109100	0.165413	0.129378	0.171564	0.142068	0.112537	0.479797	0.0770522	0.0830469
Chr3	23115500	23115900	0.174407	0.134142	0.139931	0.0998307	0.163526	0.386767	0.0554053	0.0751033
Chr3	23117400	23117600	0.240767	0.268631	0.418451	0.291636	0.284247	0.349957	0.0876537	0.141046
Chr4	67400	67600	0.0852667	0.044009	0.101249	0.0729581	0.0075016	0.137398	0.0977714	0.0312499
Chr4	68700	69000	0.0501719	0.0633013	0.105603	0.0899072	0.0402789	0.328651	0.00675505	0.0135787
Chr4	77000	77700	0.199435	0.19258	0.208891	0.192579	0.215598	0.350142	0.166744	0.0675803
Chr4	78900	79100	0.638757	0.391797	0.541809	0.483857	0.520045	0.555102	0.193759	0.183115
Chr4	79700	80100	0.55673	0.438429	0.442174	0.480479	0.542398	0.347245	0.0982152	0.089915
Chr4	185200	185400	0.286211	0.184005	0.348762	0.44518	0.296964	0.430718	0.0661819	0.11167
Chr4	297900	298100	0.318971	0.302587	0.398492	0.357945	0.362212	0.239916	0.0623278	0.0922279
Chr4	298700	298900	0.385159	0.336931	0.410501	0.383731	0.446763	0.462541	0.123495	0.0805568
Chr4	313300	314300	0.408895	0.396187	0.476096	0.391262	0.479918	0.240177	0.0187384	0.0368129
Chr4	348000	348200	0.458409	0.312695	0.300987	0.529262	0.470957	0.528214	0.0733704	0.288542
Chr4	370900	372100	0.361707	0.340163	0.43231	0.296797	0.403718	0.20013	0.0144838	0.0427606
Chr4	378900	379400	0.087534	0.0796484	0.0892602	0.0986254	0.0832817	0.243292	0.0140636	0.0151672
Chr4	417600	417800	0.300794	0.0498713	0.238529	0.21932	0.244626	0.294383	0.0161905	0.0721249
Chr4	434200	434500	0.121366	0.0786584	0.163903	0.235225	0.0951222	0.363609	0.0175988	0.0245085
Chr4	476100	476300	0.179266	0.19749	0.295416	0.294674	0.301676	0.481886	0.00773064	0.0756066
Chr4	524400	524600	0.095925	0.0437496	0.0751374	0.0969728	0.0774296	0.289995	0.0696338	0.0472605
Chr4	554000	554200	0.0598036	0.0675017	0.0885287	0.0791094	0.0697202	0.204475	0	0.0270906
Chr4	555400	555600	0.0381342	0.0688562	0.0998132	0.104521	0.141596	0.165567	0.0011655	0.0303819
Chr4	558900	559100	0.0880708	0.204994	0.135754	0.0930763	0.177149	0.261072	0.00744047	0.00908389
Chr4	572400	572800	0.473059	0.362708	0.51872	0.37705	0.431126	0.20163	0.0191997	0.0304462
Chr4	581800	582000	0.237542	0.133035	0.173722	0.225226	0.131661	0.308669	0.0273551	0.0531844
Chr4	583400	583600	0.0295346	0.0275139	0.0381894	0.0523838	0.0554905	0.142133	0.0119004	0.0129565
Chr4	617800	618100	0.171422	0.123857	0.196434	0.186214	0.191473	0.252468	0.00927959	0.0349578
Chr4	697400	697800	0.17536	0.217458	0.141035	0.169658	0.169791	0.297322	0.043238	0.0401574
Chr4	698600	698800	0.276006	0.162252	0.33327	0.219352	0.324849	0.292245	0.00536341	0.0510417
Chr4	743100	743500	0.103496	0.053787	0.116531	0.131622	0.110131	0.300542	0.00101626	0.058538
Chr4	764200	764400	0.171136	0.126258	0.100584	0.30767	0.160831	0.400145	0.0470017	0.0583223
Chr4	792300	792700	0.283013	0.21065	0.424836	0.315623	0.287625	0.122868	0.00353825	0.0362581
Chr4	823500	824100	0.378415	0.251156	0.423754	0.316804	0.439995	0.270951	0.0405097	0.0551537
Chr4	848800	849000	0.256801	0.174144	0.275254	0.215101	0.267625	0.547917	0.0391053	0.0787309
Chr4	929400	929700	0.292512	0.164354	0.284103	0.229265	0.277013	0.378307	0.0600787	0.0769533
Chr4	964200	964600	0.339974	0.25662	0.375116	0.208919	0.396134	0.257726	0.000865051	0.0533118
Chr4	983200	983500	0.147389	0.116595	0.0856428	0.188776	0.14517	0.504002	0.0151447	0.0120071
Chr4	993900	994100	0.288035	0.252651	0.250573	0.163627	0.331387	0.112791	0.0116497	0.0765168
Chr4	1000600	1001400	0.516589	0.434837	0.5359	0.439904	0.506409	0.180387	0.0257183	0.0397141
Chr4	1023800	1024300	0.207046	0.140609	0.210309	0.170842	0.152773	0.224556	0.0393916	0.0409853
Chr4	1042000	1042200	0.206712	0.114287	0.265906	0.125037	0.24681	0.420416	0	0.0535855
Chr4	1063600	1064200	0.0461997	0.0804548	0.10619	0.212534	0.0550527	0.303447	0.00614504	0.0121522
Chr4	1090700	1091900	0.292418	0.172328	0.295401	0.251383	0.266751	0.354833	0.106736	0.11987
Chr4	1100700	1100900	0.317366	0.202741	0.40838	0.309477	0.326911	0.257236	0.00333334	0.0683849
Chr4	1116500	1116900	0.439108	0.474099	0.506742	0.542042	0.543859	0.440186	0.187985	0.189871
Chr4	1190000	1190300	0.375954	0.303923	0.330382	0.3556	0.381777	0.528927	0.076424	0.141219
Chr4	1224000	1224200	0.235978	0.127571	0.204879	0.237057	0.276928	0.496136	0.0588337	0.0624033
Chr4	1230500	1230800	0.289113	0.263831	0.348929	0.279674	0.253906	0.312449	0.0698997	0.0539093
Chr4	1233600	1234000	0.0777864	0.0586176	0.0950187	0.102185	0.0980679	0.234941	0.0525671	0.0686546
Chr4	1234500	1234800	0.148583	0.0811652	0.150714	0.148008	0.129629	0.268059	0.0167214	0.0497528
Chr4	1270600	1270800	0.0933757	0.0513434	0.0603012	0.124651	0.0834361	0.299347	0.0144413	0.0579815
Chr4	1282600	1283000	0.29258	0.220254	0.298275	0.218305	0.305679	0.146548	0.0146104	0.0203281
Chr4	1289000	1289200	0.0726405	0.0699489	0.0333108	0.0436968	0.0168561	0.191435	0.0246588	0.049536
Chr4	1337700	1338300	0.0943158	0.0577986	0.0920052	0.126063	0.131202	0.273337	0.0482269	0.0467681
Chr4	1350000	1350600	0.531758	0.438655	0.492321	0.373464	0.52952	0.261986	0.0242894	0.039517
Chr4	1357300	1357500	0.0442966	0.0159462	0.0559189	0.0751257	0.0557676	0.154941	0.00564692	0.00415776
Chr4	1365900	1366200	0.162319	0.131146	0.234149	0.232126	0.182945	0.495028	0.00613353	0.0205789
Chr4	1373100	1373300	0.0954036	0.0404135	0.126349	0.0686672	0.155861	0.351179	0.0394688	0.0561892
Chr4	1438200	1439400	0.162328	0.172081	0.176347	0.211106	0.223503	0.259236	0.0222481	0.0447759
Chr4	1487400	1487600	0.344469	0.233163	0.335717	0.24379	0.311302	0.442777	0.0457552	0.0775869
Chr4	1488400	1488600	0.266482	0.24425	0.395028	0.26881	0.265057	0.702842	0.0460734	0.0686875
Chr4	1507000	1507200	0.0609154	0.0575828	0.0958996	0.118158	0.0968134	0.388057	0.0243292	0.0945766
Chr4	1568400	1568900	0.084206	0.0727017	0.101264	0.0509502	0.156638	0.41611	0.00580829	0.109812
Chr4	1776000	1776200	0.0645447	0.0319406	0.0320237	0.0123669	0.0332381	0.163564	0.007161	0.0027027
Chr4	1958700	1958900	0.24199	0.136506	0.251542	0.107498	0.288505	0.143701	0.0112687	0.0519698
Chr4	2032400	2032600	0.1282	0.0217395	0.02303	0.028216	0.0141801	0.360592	0.00304878	0.051343
Chr4	2117500	2117700	0.143559	0.0855283	0.143026	0.107544	0.159928	0.170286	0.0093254	0.0661829
Chr4	2169500	2169700	0.131713	0.0851683	0.194361	0.181978	0.273325	0.254476	0.048867	0.0662529
Chr4	2235200	2235500	0.111632	0.0843705	0.164781	0.0708175	0.109931	0.13986	0.0488646	0.0442464
Chr4	2237800	2238000	0.0532321	0.0245519	0.0164078	0.0271923	0.0312346	0.219066	0.0192298	0.0237827
Chr4	2258300	2258600	0.121336	0.108625	0.165625	0.158011	0.184658	0.248719	0.0560875	0.0351129
Chr4	2288600	2288900	0.0301597	0.026079	0.049401	0.100093	0.0555661	0.26917	0.0197468	0.0453217
Chr4	2313400	2313600	0.0319258	0.026267	0.0333124	0.173156	0.0619062	0.298585	0.0701223	0.161663
Chr4	2322900	2323200	0.0848344	0.127216	0.107859	0.112741	0.102661	0.290751	0.0159654	0.0438493
Chr4	2345800	2346100	0.254305	0.143071	0.190731	0.226877	0.153531	0.324299	0.0985294	0.0928688
Chr4	2367200	2367400	0.176854	0.129208	0.0817507	0.208217	0.0660684	0.392711	0.0151927	0.0697787
Chr4	2430500	2430900	0.080787	0.07	0.159987	0.0687956	0.0699915	0.112152	0.0393875	0.0546039
Chr4	2467800	2468100	0.121015	0.0715951	0.0683714	0.091297	0.148155	0.20447	0.0245613	0.0871588
Chr4	2496600	2496900	0.162	0.105542	0.206082	0.188034	0.210465	0.290058	0.0739409	0.0572429
Chr4	2508600	2508900	0.24371	0.238183	0.286706	0.299041	0.270589	0.304315	0.0455677	0.0562519
Chr4	2553500	2553700	0.35973	0.244942	0.394434	0.328987	0.444306	0.316344	0.0928507	0.0899604
Chr4	2592500	2592700	0.177491	0.197586	0.178549	0.236907	0.247357	0.382219	0.00187617	0.0211563
Chr4	2594900	2595300	0.0587399	0.107705	0.0964168	0.161118	0.0984088	0.309502	0.00334891	0.0095598
Chr4	2605800	2606400	0.0958101	0.081577	0.0799049	0.120714	0.0793042	0.258861	0.0681339	0.0543752
Chr4	2606700	2607100	0.040294	0.025161	0.0323977	0.074469	0.0683618	0.183636	0.0231669	0.0717495
Chr4	2617800	2618000	0.0830895	0.0695308	0.133142	0.159527	0.147435	0.505895	0.0859006	0.0348869
Chr4	2663900	2664200	0.299583	0.305952	0.326154	0.276053	0.258481	0.441139	0.0702002	0.0968762
Chr4	2674200	2674600	0.0713227	0.093307	0.0953958	0.087953	0.0746391	0.283508	0.0228732	0.0521375
Chr4	2713400	2713600	0.201371	0.0910834	0.191398	0.0426542	0.116216	0.183766	0.0718033	0.125958
Chr4	2800200	2800700	0.293254	0.296534	0.296769	0.194686	0.215487	0.247196	0.0683508	0.184034
Chr4	2989500	2989800	0.226754	0.0803908	0.114462	0.0490633	0.0917129	0.310077	0.00303644	0.0260774
Chr4	3662900	3663100	0.335202	0.223789	0.310775	0.187759	0.261298	0.418484	0.0646727	0.0703621
Chr4	3768100	3768400	0.264015	0.0378195	0.226304	0.292538	0.0755508	0.324042	0.125714	0.263166
Chr4	4068300	4068500	0.184249	0.086297	0.226197	0.0905194	0.241083	0.185236	0.0409282	0.0732268
Chr4	4643500	4643800	0.126918	0.118842	0.185084	0.205334	0.219883	0.482152	0.055061	0.0467734
Chr4	4645300	4645800	0.3269	0.387415	0.295309	0.255097	0.40686	0.472279	0.108475	0.0912909
Chr4	4844400	4844600	0.0573018	0.0337206	0.0144582	0.0472907	0.105511	0.271305	0.0193495	0.0580576
Chr4	5083600	5083800	0.0770929	0.0449019	0.0434189	0.147784	0.0757151	0.435014	0.117022	0.171495
Chr4	5194100	5194600	0.20177	0.155096	0.230078	0.171517	0.292748	0.282172	0.0198802	0.0309366
Chr4	5252200	5252500	0.162353	0.11627	0.14172	0.15457	0.138394	0.324157	0.0129931	0.0244472
Chr4	5257000	5257200	0.0841516	0.0749809	0.094963	0.0441314	0.146801	0.223198	0.0310241	0.0365701
Chr4	5272600	5272900	0.378661	0.223521	0.269091	0.140985	0.163493	0.19547	0.093274	0.0912393
Chr4	5280200	5280400	0.381566	0.202387	0.401382	0.263502	0.405677	0.243579	0.0150794	0.0439851
Chr4	5293000	5293200	0.123483	0.0950311	0.136428	0.217635	0.0916355	0.185559	0.021148	0.027679
Chr4	5294000	5294200	0.257273	0.0994912	0.241166	0.269149	0.265557	0.369845	0.0655264	0.0563155
Chr4	5314500	5314700	0.0573408	0.0329547	0.0992576	0.122913	0.104884	0.219254	0.0340897	0.0388792
Chr4	5317700	5318100	0.0400012	0.0509832	0.0784499	0.0759797	0.0769053	0.305014	0.0426678	0.0245153
Chr4	5391800	5392300	0.515822	0.350543	0.559881	0.406045	0.495478	0.228242	0.0194382	0.0771187
Chr4	5450600	5450800	0.0477882	0.0384424	0.0624421	0.0731745	0.0274694	0.170673	0.00455757	0.0250428
Chr4	5456500	5456700	0.483706	0.392821	0.494216	0.455249	0.488629	0.348991	0.116237	0.102652
Chr4	5618000	5618200	0.135791	0.121502	0.141862	0.253153	0.196853	0.397817	0.00366465	0.00967598
Chr4	5629900	5630300	0.101263	0.149559	0.211373	0.0986408	0.173297	0.327351	0.0159267	0.118134
Chr4	5644800	5645400	0.0493819	0.0473142	0.0518782	0.068145	0.0512264	0.182955	0.0214513	0.0392694
Chr4	5647100	5647300	0.0511328	0.0612371	0.0237549	0.0852483	0.0613777	0.310929	0.016925	0.0272564
Chr4	5650300	5650500	0.0783112	0.0504674	0.0416598	0.0348678	0.0271785	0.357463	0.0483722	0.0500021
Chr4	5697600	5697800	0.127968	0.14357	0.193164	0.178001	0.170591	0.2161	0.0706398	0.068292
Chr4	5710400	5710600	0.202323	0.2416	0.255051	0.23712	0.212364	0.449458	0.0240749	0.0530943
Chr4	5727500	5727700	0.233647	0.226823	0.325848	0.295978	0.228444	0.332547	0.0553438	0.0346487
Chr4	5728100	5728300	0.0902431	0.0824504	0.0957695	0.127461	0.117522	0.256726	0.021113	0.0467899
Chr4	5763800	5764000	0.0518715	0.0515201	0.0538371	0.0748426	0.0433615	0.35571	0.0079761	0.0486354
Chr4	5790800	5791100	0.255157	0.227763	0.202824	0.225773	0.24565	0.246401	0.0642286	0.0800562
Chr4	5791400	5791900	0.185909	0.16148	0.215884	0.213467	0.208312	0.262774	0.0665818	0.0591955
Chr4	5794100	5794400	0.0716517	0.0831705	0.0497839	0.124289	0.0300413	0.308645	0.066624	0.0313325
Chr4	5808600	5808900	0.11383	0.092554	0.104647	0.16935	0.137811	0.271832	0.032715	0.0521947
Chr4	5836400	5837200	0.214914	0.123489	0.251836	0.192411	0.231847	0.293411	0.0318116	0.114425
Chr4	5846000	5846200	0.496362	0.420951	0.472335	0.416438	0.415591	0.346949	0.127199	0.227726
Chr4	5883300	5883500	0.233319	0.101339	0.477659	0.187375	0.373229	0.257377	0.147343	0.152671
Chr4	5884100	5884400	0.329302	0.323164	0.403863	0.33026	0.237622	0.111339	0.0120444	0.0454831
Chr4	5964400	5964900	0.203865	0.136442	0.189459	0.200516	0.144964	0.326353	0.0635082	0.0838198
Chr4	5987000	5987600	0.037463	0.0569139	0.0392144	0.105884	0.0480506	0.172767	0.00637927	0.120047
Chr4	5992200	5992700	0.0624181	0.0453113	0.0673835	0.121545	0.0781899	0.285283	0.0650848	0.0658693
Chr4	6014700	6014900	0.0247952	0.0569833	0.0765869	0.0654952	0.0754655	0.30591	0.0159406	0.0309335
Chr4	6016300	6016500	0.108059	0.112654	0.0630648	0.164972	0.135218	0.342044	0.00490702	0.0135501
Chr4	6034000	6034200	0.0884127	0.0652895	0.109434	0.157567	0.137343	0.351226	0.0294717	0.060654
Chr4	6054500	6054800	0.387181	0.269264	0.336008	0.297025	0.365236	0.44708	0.143955	0.0861537
Chr4	6132500	6132800	0.102463	0.0576522	0.0476765	0.12884	0.0673924	0.330931	0.101783	0.115216
Chr4	6169100	6169300	0.267736	0.142959	0.337557	0.208479	0.23315	0.11428	0.0138889	0.0258173
Chr4	6173000	6173500	0.451723	0.306006	0.469971	0.321169	0.47542	0.318168	0.0171565	0.0275322
Chr4	6178400	6178600	0.483535	0.249121	0.447143	0.337248	0.366092	0.281146	0.0025641	0.0936033
Chr4	6179200	6179600	0.15184	0.126565	0.201777	0.0988228	0.292298	0.270325	0.0161397	0.0729226
Chr4	6216500	6216700	0.44521	0.173499	0.352766	0.200515	0.473547	0.412786	0.00555557	0.0638099
Chr4	6243000	6243800	0.300137	0.220099	0.328944	0.251021	0.323208	0.131588	0.0397347	0.0677917
Chr4	6252400	6252600	0.273098	0.213107	0.351176	0.230963	0.241999	0.375623	0.0738497	0.0884948
Chr4	6274000	6274500	0.38682	0.206517	0.404617	0.409129	0.338449	0.258825	0.00419175	0.0581976
Chr4	6343900	6344100	0.0852706	0.0526713	0.0727834	0.105104	0.0663243	0.28918	0.00328947	0.0190782
Chr4	6359700	6359900	0.204126	0.13867	0.247113	0.269186	0.230806	0.404113	0.0868539	0.0473398
Chr4	6374000	6374200	0.0121124	0.0499232	0.0277091	0.156653	0.0521337	0.327651	0.0230143	0.0258447
Chr4	6395200	6395400	0.363967	0.245722	0.345009	0.137037	0.473603	0.173188	0.0160257	0.162155
Chr4	6414300	6414600	0.255638	0.140674	0.378276	0.266471	0.306884	0.237647	0.0517567	0.0860025
Chr4	6426900	6427200	0.261266	0.181754	0.344328	0.211688	0.32809	0.187844	0.0361362	0.0272666
Chr4	6429700	6430000	0.464496	0.383058	0.53888	0.401591	0.483464	0.534964	0.248992	0.211173
Chr4	6479500	6479800	0.256845	0.190518	0.23564	0.212101	0.277772	0.330358	0.0205595	0.029889
Chr4	6487300	6487700	0.0538103	0.0797924	0.0492255	0.0898372	0.0669482	0.210068	0.0248912	0.0327123
Chr4	6505700	6505900	0.444325	0.202679	0.33321	0.204093	0.323149	0.234926	0.00841506	0.114765
Chr4	6625700	6625900	0.150284	0.1426	0.163884	0.164018	0.201609	0.20359	0.00831169	0.0271648
Chr4	6655800	6656000	0.0622885	0.079856	0.0628773	0.187933	0.0938648	0.333576	0.118126	0.177107
Chr4	6660900	6661500	0.405586	0.236684	0.411672	0.283862	0.279194	0.208032	0.0271837	0.0771571
Chr4	6699200	6699700	0.700535	0.543661	0.674904	0.540368	0.619985	0.453757	0.0485107	0.0678731
Chr4	6700100	6700300	0.412209	0.335995	0.439379	0.28183	0.398981	0.229106	0.00707692	0.0863073
Chr4	6718900	6719100	0.180035	0.195608	0.102513	0.289859	0.24741	0.3632	0.0541988	0.0413912
Chr4	6752100	6752300	0.308602	0.290209	0.30637	0.378951	0.395819	0.523059	0.026215	0.0500837
Chr4	6757000	6757200	0.309833	0.182166	0.356244	0.189693	0.425566	0.155103	0.0190972	0.0740461
Chr4	6768100	6768400	0.237414	0.201538	0.270643	0.216355	0.197328	0.402919	0.0835288	0.0952765
Chr4	6790500	6790700	0.315484	0.116046	0.415521	0.263092	0.308249	0.373743	0.040506	0.048761
Chr4	6793900	6794200	0.029949	0.0600569	0.0278259	0.160138	0.0386237	0.359751	0.0185367	0.0344256
Chr4	6874500	6874800	0.116875	0.0532068	0.218778	0.228388	0.154569	0.462741	0.00884857	0.0110799
Chr4	6890400	6890600	0.0574092	0.111936	0.0834263	0.106318	0.104172	0.376775	0.0144267	0.00479151
Chr4	6895000	6895600	0.408817	0.258038	0.389974	0.362349	0.406482	0.254857	0.0217173	0.0528675
Chr4	6899700	6899900	0.0978639	0.157748	0.153201	0.272647	0.1763	0.468165	0.042874	0.0797393
Chr4	6908400	6908700	0.374423	0.283981	0.301645	0.329022	0.321214	0.327767	0.0807211	0.0421207
Chr4	6934400	6934600	0.0465842	0.0335813	0.0869359	0.0967819	0.115415	0.266417	0.00796639	0.0760657
Chr4	6943800	6944600	0.293143	0.146708	0.226366	0.216298	0.26253	0.283004	0.0454987	0.0528656
Chr4	6954200	6954500	0.0592234	0.108093	0.105017	0.145744	0.074962	0.440766	0.0836403	0.139346
Chr4	7040900	7041100	0.573891	0.263938	0.550074	0.203418	0.388655	0.501257	0.0956382	0.230717
Chr4	7058600	7058800	0.174168	0.165591	0.182783	0.306447	0.186841	0.278376	0.0348769	0.0393317
Chr4	7084500	7084700	0.311382	0.168539	0.355871	0.28728	0.348272	0.434754	0.0684768	0.0976625
Chr4	7090000	7090200	0.0130853	0.0241293	0.0333005	0.109344	0.0331704	0.172078	0.0103059	0.0140609
Chr4	7102400	7102700	0.174044	0.116431	0.203707	0.198334	0.16931	0.300632	0.0441449	0.0566418
Chr4	7139700	7139900	0.1033	0.0758152	0.166659	0.244329	0.121064	0.571576	0.0263124	0.00685941
Chr4	7154800	7155100	0.446287	0.280333	0.383164	0.393426	0.360351	0.397506	0.0901994	0.0761541
Chr4	7190900	7191200	0.114129	0.0721531	0.194468	0.153544	0.168501	0.237563	0.0117188	0.039321
Chr4	7195600	7195800	0.201527	0.191465	0.179019	0.11064	0.259189	0.323886	0	0.0394088
Chr4	7231300	7231600	0.450737	0.306455	0.487561	0.430438	0.520094	0.286616	0.105656	0.0907952
Chr4	7267400	7267600	0.149621	0.100887	0.2099	0.109313	0.142203	0.273434	0.00449172	0
Chr4	7313300	7313600	0.26012	0.141182	0.287902	0.19234	0.239776	0.278045	0.0163462	0.0411423
Chr4	7318500	7318700	0.056939	0.0724853	0.0662123	0.108071	0.128795	0.327482	0.023157	0.0065934
Chr4	7330500	7331100	0.121165	0.111349	0.113785	0.136369	0.062063	0.253127	0.0221606	0.0566261
Chr4	7345900	7346100	0.0491607	0.0318351	0.0447854	0.116115	0.0825666	0.201704	0.0511051	0.0364347
Chr4	7348500	7348700	0.496508	0.353543	0.559006	0.455416	0.506131	0.471451	0.0867704	0.0480168
Chr4	7353300	7353500	0.0739675	0.111238	0.0652259	0.109936	0.0956725	0.431697	0.0560345	0.0714761
Chr4	7360000	7360400	0.510164	0.33971	0.636024	0.48133	0.490555	0.182433	0.0225083	0.0827423
Chr4	7383500	7383700	0.497326	0.321365	0.332167	0.492238	0.389705	0.334071	0.0259092	0.073068
Chr4	7390800	7391000	0.047779	0.0922521	0.0976588	0.12765	0.0898553	0.421287	0.0362574	0.0522079
Chr4	7404500	7404800	0.258525	0.152085	0.323352	0.251152	0.159078	0.360074	0.0682088	0.108908
Chr4	7426100	7426300	0.245517	0.216492	0.160884	0.319162	0.325839	0.375546	0.0969739	0.0899227
Chr4	7519800	7520100	0.101326	0.0671512	0.111981	0.11474	0.0930245	0.392295	0.00429548	0.0444513
Chr4	7524800	7525000	0.313306	0.328666	0.297661	0.263842	0.254389	0.371544	0.0886986	0.141826
Chr4	7526500	7526700	0.148464	0.0653183	0.185443	0.244668	0.130434	0.383602	0.134476	0.0660269
Chr4	7564000	7564200	0.358882	0.321842	0.400981	0.327261	0.320757	0.535413	0.113885	0.10411
Chr4	7565100	7565300	0.365289	0.28275	0.300176	0.322371	0.299956	0.469292	0.19003	0.166116
Chr4	7629900	7630100	0	0.0470588	0.248246	0.100476	0.127183	0.035606	0.0133333	0.025
Chr4	7652500	7653200	0.397105	0.312911	0.473296	0.418466	0.450663	0.271174	0.0302868	0.0490076
Chr4	7669600	7669800	0.0598139	0.0310084	0.0549284	0.133739	0.0331174	0.228138	0.0077381	0.0167445
Chr4	7687900	7688400	0.194891	0.185512	0.154285	0.181174	0.183957	0.336497	0.191685	0.134496
Chr4	7821600	7821800	0.539023	0.517418	0.470001	0.427603	0.616039	0.395385	0.109206	0.132813
Chr4	7838300	7838500	0.424521	0.201663	0.401533	0.348662	0.352332	0.501113	0.0813634	0.253441
Chr4	7896300	7897000	0.155811	0.121027	0.154953	0.202687	0.173754	0.23901	0.0336143	0.0366791
Chr4	7899500	7899700	0.4357	0.1996	0.232189	0.20045	0.375945	0.25117	0.0115226	0.0628597
Chr4	7905200	7905400	0.432678	0.335881	0.315242	0.235688	0.400302	0.323581	0.0957436	0.0575269
Chr4	7905800	7906100	0.213844	0.152379	0.323975	0.203787	0.256752	0.265534	0.0469032	0.043597
Chr4	7923400	7923600	0.0702794	0.0783147	0.0399524	0.0608286	0.0522673	0.233465	0.00989656	0.0529388
Chr4	8030300	8030700	0.209958	0.151188	0.189148	0.224672	0.22499	0.222326	0.0755095	0.0370636
Chr4	8065400	8065600	0.442391	0.370749	0.472256	0.207727	0.509506	0.210792	0.0248538	0.0662395
Chr4	8141800	8142000	0.100907	0.0940279	0.079989	0.132159	0.176452	0.289619	0.0401823	0.076581
Chr4	8208000	8208200	0.0319134	0.0138275	0.0482862	0.0646936	0.057227	0.206765	0.0108454	0.017555
Chr4	8252300	8252500	0.121258	0.115508	0.232127	0.226949	0.214088	0.248953	0.00197628	0.0128445
Chr4	8326700	8327000	0.219279	0.114895	0.167275	0.233828	0.229471	0.491253	0.162126	0.134269
Chr4	8353900	8354100	0.0173061	0.0265583	0.0491959	0.0491699	0.0238658	0.179207	0.00968315	0.019571
Chr4	8405200	8405400	0.301554	0.225693	0.332845	0.284004	0.323243	0.4418	0.00777874	0.0383595
Chr4	8421100	8421900	0.396896	0.237182	0.434101	0.328288	0.418841	0.366994	0.0491411	0.121207
Chr4	8442900	8443600	0.177844	0.126144	0.201027	0.182391	0.18203	0.331018	0.0660015	0.0495485
Chr4	8461900	8462100	0.313428	0.17264	0.355982	0.242673	0.26206	0.459537	0.0691919	0.151323
Chr4	8465500	8466000	0.0786862	0.0496043	0.0613537	0.115066	0.0856489	0.185369	0.036415	0.0451512
Chr4	8503500	8503800	0.109166	0.109785	0.0924578	0.13321	0.164007	0.386658	0.0426013	0.0361289
Chr4	8550700	8551200	0.261065	0.151142	0.318888	0.242311	0.272899	0.351385	0.00575571	0.0436327
Chr4	8633300	8633500	0.228245	0.152184	0.220062	0.231405	0.220277	0.482557	0.0700214	0.0583193
Chr4	8634300	8634500	0.194632	0.119094	0.142682	0.21181	0.163629	0.558376	0.113496	0.063426
Chr4	8718200	8718500	0.589344	0.600928	0.669274	0.62901	0.6482	0.512569	0.32891	0.26593
Chr4	8725100	8725700	0.315531	0.250738	0.328491	0.253655	0.406909	0.220613	0.0209187	0.0417134
Chr4	8802300	8802700	0.461081	0.224881	0.478309	0.331642	0.394417	0.180758	0.0211363	0.0464923
Chr4	8836500	8837200	0.442698	0.306317	0.435678	0.392205	0.425841	0.355649	0.0522175	0.0350105
Chr4	8858700	8859000	0.336887	0.335612	0.381829	0.386925	0.393727	0.459823	0.15188	0.0950191
Chr4	8916500	8916800	0.075615	0.0888468	0.149409	0.160822	0.0873665	0.346844	0.0351419	0.0341535
Chr4	8957900	8958100	0.440574	0.278706	0.381051	0.384965	0.433939	0.453537	0.114612	0.0689199
Chr4	8959600	8959800	0.211681	0	0.196159	0.134372	0.326463	0.340201	0	0.0177229
Chr4	9079000	9079500	0.418011	0.325787	0.445096	0.334854	0.402446	0.246425	0.0661989	0.0629876
Chr4	9111600	9111800	0.335369	0.396362	0.369635	0.26423	0.501587	0.210173	0.0409091	0.0550928
Chr4	9146600	9147000	0.446565	0.291599	0.383861	0.321035	0.457816	0.261047	0.0638572	0.129242
Chr4	9188700	9189000	0.452641	0.252808	0.469793	0.385185	0.535622	0.374394	0.0369015	0.0176688
Chr4	9193100	9193300	0.537709	0.369013	0.577714	0.290315	0.462973	0.280655	0.0335477	0.154754
Chr4	9266200	9266500	0.0525576	0.0776958	0.11057	0.125993	0.128018	0.46878	0.00533662	0.0153846
Chr4	9284000	9284300	0.467839	0.329509	0.505657	0.382073	0.34269	0.245748	0.0447799	0.0508738
Chr4	9317800	9318000	0.147856	0.150415	0.156342	0.158379	0.181212	0.321671	0.0460718	0.0161092
Chr4	9320300	9320500	0.304696	0.216315	0.386652	0.322565	0.41381	0.497887	0.111693	0.0342719
Chr4	9357100	9357300	0.241914	0.214101	0.274263	0.207254	0.125955	0.316505	0.0399187	0.0440559
Chr4	9368700	9369000	0.467649	0.334645	0.50306	0.432991	0.576463	0.459706	0.093655	0.230151
Chr4	9429400	9429600	0.136681	0.0933418	0.179482	0.124737	0.219339	0.275133	0.0163312	0.0120946
Chr4	9440100	9440300	0.43272	0.290563	0.388035	0.520575	0.234729	0.389294	0.0524131	0.0496287
Chr4	9570500	9571100	0.543092	0.438745	0.496157	0.428686	0.466707	0.354436	0.149196	0.139106
Chr4	9573500	9574000	0.3557	0.296414	0.331374	0.297958	0.435793	0.137119	0.0333301	0.0792254
Chr4	9575400	9575600	0.555813	0.506476	0.622628	0.538049	0.54914	0.614131	0.106539	0.124157
Chr4	9688100	9688300	0.453412	0.309145	0.338478	0.306596	0.36771	0.214074	0.0305062	0.0349356
Chr4	9737600	9737800	0.0512415	0.0483822	0.054122	0.12878	0.0961461	0.234478	0.0863497	0.10529
Chr4	9756900	9757100	0.169139	0.133191	0.216042	0.185121	0.300538	0.523955	0.18502	0.0429678
Chr4	9763000	9763200	0.387456	0.349699	0.52986	0.389258	0.573754	0.196068	0.0108885	0.0657735
Chr4	9794400	9794600	0.110428	0.169976	0.263854	0.137481	0.167296	0.138039	0.0338154	0.0350272
Chr4	9841800	9842100	0.670718	0.40164	0.531855	0.466967	0.542528	0.23309	0.0136121	0.0542069
Chr4	9861000	9861200	0.380306	0.21019	0.354992	0.262233	0.202716	0.285476	0.0166667	0.142108
Chr4	9903900	9904200	0.346097	0.167616	0.29072	0.248945	0.321842	0.51983	0.13596	0.057145
Chr4	9909000	9909400	0.410544	0.324797	0.516994	0.335765	0.468754	0.545658	0.242538	0.14877
Chr4	9912000	9912600	0.251517	0.109135	0.294816	0.139956	0.174188	0.202916	0.0468756	0.109314
Chr4	9913200	9914100	0.463414	0.381106	0.532611	0.394369	0.479861	0.366059	0.17217	0.108861
Chr4	9954900	9955400	0.108886	0.106131	0.109653	0.13121	0.146558	0.157797	0.0592356	0.124739
Chr4	9956100	9956300	0.286029	0.127284	0.178295	0.210179	0.185642	0.550518	0.215547	0.189133
Chr4	9980900	9981100	0.294773	0.182304	0.181519	0.189382	0.174218	0.520835	0.00921065	0.00848878
Chr4	9981400	9981600	0.482702	0.553166	0.611445	0.637196	0.686154	0.51551	0.113197	0.27486
Chr4	10011100	10011300	0.0996846	0.095341	0.0445196	0.206004	0.0900917	0.30203	0.00532916	0.0124062
Chr4	10189500	10189700	0.075294	0.0544531	0.0636863	0.0892029	0.0451689	0.284836	0.050455	0.0380511
Chr4	10192500	10192700	0.0287645	0.107718	0.0959444	0.134284	0.0554741	0.163135	0.00416667	0.0129079
Chr4	10271200	10271600	0.39146	0.377943	0.410421	0.350547	0.423688	0.365491	0.152527	0.155897
Chr4	10283800	10284000	0.0954737	0.0847819	0.196394	0.168277	0.123846	0.318073	0.0378897	0.0952757
Chr4	10351300	10351500	0.036564	0.0129187	0.140345	0.102745	0.146036	0.263014	0.0142783	0.0125316
Chr4	10395400	10395700	0.439214	0.228908	0.475023	0.399472	0.454485	0.225072	0.00855481	0.0483547
Chr4	10400600	10400900	0.167059	0.150174	0.107595	0.181572	0.153663	0.321004	0.0557663	0.0626304
Chr4	10401500	10401800	0.105334	0.097919	0.0943374	0.104878	0.1914	0.28691	0.0188003	0.0182684
Chr4	10532300	10532600	0.0511917	0.0192549	0.027907	0.0380958	0.0418474	0.137829	0.00881833	0.0278646
Chr4	10538800	10539000	0.302312	0.168165	0.369126	0.222439	0.234986	0.211265	0.0645991	0.138424
Chr4	10591700	10592100	0.251336	0.181003	0.207359	0.161161	0.194524	0.319168	0.00847458	0.0664991
Chr4	10633300	10633600	0.261791	0.156059	0.197418	0.295597	0.278002	0.508185	0.0836677	0.0421169
Chr4	10647400	10647600	0.325469	0.225189	0.244552	0.303233	0.242768	0.424451	0.0437337	0.0832699
Chr4	10648300	10648600	0.213556	0.183817	0.219424	0.135557	0.183973	0.260643	0.105288	0.069586
Chr4	10649100	10649300	0.199932	0.144544	0.217077	0.282669	0.157443	0.413739	0.0319109	0.0564106
Chr4	10716700	10717000	0.14406	0.116794	0.160274	0.1856	0.179594	0.427786	0.0433907	0.0436088
Chr4	10792600	10792800	0.297338	0.221666	0.383591	0.182726	0.292366	0.338918	0.0275961	0.0540105
Chr4	10870800	10871200	0.378136	0.268636	0.475831	0.363488	0.443177	0.271509	0.118897	0.109141
Chr4	10899500	10900200	0.604589	0.384485	0.63893	0.510567	0.508414	0.410297	0.12416	0.0950931
Chr4	10900900	10901100	0.430584	0.236593	0.273732	0.284467	0.289997	0.0858187	0.00675676	0.0247253
Chr4	10902700	10903200	0.265892	0.315849	0.375452	0.26164	0.33457	0.122632	0.0487466	0.0679138
Chr4	10904500	10905000	0.373385	0.271629	0.342135	0.375773	0.284898	0.290884	0.153261	0.0918626
Chr4	10928200	10928400	0.269264	0.222352	0.218138	0.198285	0.149842	0.199106	0.0197941	0.0360467
Chr4	10959400	10959600	0.121353	0.124066	0.206406	0.126479	0.227209	0.498072	0.0210884	0.0270468
Chr4	10960500	10960700	0.180834	0.226852	0.289144	0.186529	0.273504	0.296446	0.0231729	0.128958
Chr4	11192900	11193600	0.54071	0.374883	0.551122	0.456985	0.496557	0.303607	0.0260198	0.040797
Chr4	11216500	11216700	0.0765492	0.105326	0.0998848	0.170013	0.0866019	0.254461	0.0269206	0.0199403
Chr4	11224100	11224800	0.384079	0.295555	0.421596	0.281243	0.368755	0.217028	0.0384371	0.0860925
Chr4	11255700	11255900	0.0173662	0.0329722	0.0820483	0.0833137	0.0380122	0.331195	0.0100129	0.0150517
Chr4	11361300	11361700	0.553592	0.338453	0.52482	0.407185	0.43418	0.245854	0.0280232	0.112867
Chr4	11379700	11379900	0.0340596	0.0628893	0.0981855	0.10901	0.0334157	0.343137	0	0.0378654
Chr4	11415800	11416100	0.0678154	0.0547939	0.073535	0.125748	0.0464472	0.390661	0.0170806	0.00979418
Chr4	11676500	11676700	0.0798957	0.109255	0.113748	0.191689	0.10014	0.404843	0.113237	0.120537
Chr4	11757100	11757400	0.0575044	0.0976701	0.0539396	0.162219	0.094976	0.354318	0.0341052	0.0349184
Chr4	11769000	11769200	0.105768	0.0495029	0.124872	0.163176	0.168715	0.408204	0.0228395	0.065873
Chr4	11834100	11834300	0.0652141	0.0805586	0.0993089	0.072945	0.0964474	0.191556	0.0237503	0.0931007
Chr4	11838400	11838700	0.05359	0.0446738	0.0654439	0.0686207	0.0788328	0.221043	0.0238645	0.0463826
Chr4	11932200	11932500	0.0645219	0.036147	0.0641446	0.110198	0.0696816	0.153625	0.00454086	0.00912019
Chr4	11946400	11946600	0.0980984	0.117667	0.0556767	0.0904263	0.0606759	0.286363	0.026812	0.0239807
Chr4	11963500	11963800	0.154081	0.0953577	0.180604	0.175539	0.139202	0.468704	0.00623837	0.018252
Chr4	11978800	11979000	0.293133	0.173979	0.29704	0.181503	0.321113	0.176058	0.0334766	0.0673264
Chr4	11979300	11979600	0.478684	0.353074	0.474964	0.470623	0.402954	0.272991	0.157186	0.112456
Chr4	12093000	12093400	0.297558	0.285202	0.289347	0.236466	0.182762	0.194793	0.0890463	0.0573122
Chr4	12365100	12365600	0.580901	0.403795	0.621184	0.433571	0.575853	0.455235	0.0605152	0.0629685
Chr4	12384700	12384900	0.266024	0.236367	0.380066	0.215312	0.353184	0.375719	0.0701146	0.24558
Chr4	12606500	12607000	0.464251	0.45825	0.512993	0.498432	0.54694	0.391639	0.0668764	0.0953337
Chr4	12699100	12699300	0.405216	0.364876	0.598792	0.526645	0.553989	0.420205	0.115986	0.102184
Chr4	12740200	12740500	0.386257	0.349212	0.336324	0.358774	0.353893	0.48368	0.0053868	0.107093
Chr4	12768900	12769300	0.233688	0.1222	0.28953	0.342214	0.274409	0.411806	0.005406	0.0599653
Chr4	12829500	12830300	0.345059	0.264815	0.344282	0.333975	0.39034	0.236603	0.042234	0.0618721
Chr4	12844300	12844500	0.378269	0.194373	0.303124	0.206121	0.277823	0.297275	0.0171834	0.0458601
Chr4	12844900	12845100	0.329373	0.25357	0.391161	0.323191	0.276937	0.239188	0.0261607	0.0669685
Chr4	12968000	12968500	0.393942	0.234032	0.33289	0.303241	0.406219	0.271411	0.0308754	0.12023
Chr4	13123900	13124500	0.410348	0.265799	0.461658	0.298655	0.425913	0.295402	0.0394124	0.0511973
Chr4	13418300	13418500	0.325542	0.237945	0.420508	0.274455	0.397609	0.284333	0.00893856	0.109582
Chr4	13419200	13419400	0.560236	0.368445	0.587742	0.447991	0.543618	0.292408	0.00163666	0.0285622
Chr4	13537600	13538000	0.507167	0.356386	0.519651	0.365834	0.507	0.269076	0.0382582	0.0372763
Chr4	13657300	13657500	0.198925	0.147464	0.0968859	0.215323	0.120227	0.391616	0.163092	0.128484
Chr4	13705100	13705300	0.0520067	0.0369703	0.0734745	0.144531	0.132675	0.396994	0.00297313	0.0143379
Chr4	13887300	13887500	0.113953	0.053939	0.117695	0.136476	0.181711	0.293189	0.107246	0.0669477
Chr4	13887900	13888100	0.104467	0.0661449	0.159362	0.137731	0.151752	0.372594	0.00818426	0.0831357
Chr4	14045600	14045800	0.241175	0.187503	0.274181	0.207379	0.25233	0.481269	0.0780024	0.0244885
Chr4	14122100	14122400	0.185348	0.192345	0.202368	0.22451	0.261151	0.319221	0.0608657	0.0482613
Chr4	14250000	14250200	0.190371	0.163084	0.169417	0.200388	0.186694	0.346729	0.110704	0.0368853
Chr4	14327800	14328200	0.141699	0.109664	0.108719	0.12655	0.130195	0.262655	0.0138645	0.0604098
Chr4	14546300	14546600	0.0268439	0.0141349	0.0363505	0.119775	0.139344	0.226724	0.00575542	0.00780487
Chr4	14582300	14582500	0.152317	0.121219	0.30047	0.289282	0.310794	0.409293	0.0165733	0.0561826
Chr4	14887400	14887600	0.0878967	0.088433	0.0690412	0.072875	0.126889	0.480598	0.060968	0.0698991
Chr4	14911700	14911900	0.160124	0.0888226	0.200065	0.240776	0.179645	0.49309	0.0615578	0.0451887
Chr4	14989600	14989900	0.197266	0.134305	0.217629	0.255903	0.318951	0.368022	0.0397788	0.0873802
Chr4	15065900	15066700	0.319238	0.229341	0.346213	0.244741	0.348152	0.266324	0.0775062	0.077195
Chr4	15397700	15397900	0.105609	0.0430996	0.187106	0.118174	0.15117	0.219642	0.0434031	0.0566848
Chr4	15441800	15442200	0.571692	0.382428	0.560886	0.408357	0.512911	0.388458	0.107635	0.0769879
Chr4	15595800	15596000	0.375425	0.352635	0.405184	0.296489	0.302264	0.393779	0.0723177	0.0742097
Chr4	15596500	15596800	0.283997	0.116792	0.247775	0.287619	0.221457	0.317456	0.0349561	0.0463876
Chr4	15816100	15816700	0.477951	0.315759	0.494538	0.378659	0.495295	0.346423	0.0331619	0.0744742
Chr4	15922800	15923000	0.21337	0.190312	0.359375	0.268843	0.26464	0.505978	0.048077	0.0705083
Chr4	15923900	15924100	0.2594	0.209521	0.31649	0.168609	0.20671	0.423453	0.0403299	0.0270001
Chr4	16054500	16054900	0.241834	0.151385	0.250531	0.178011	0.256851	0.230937	0.0297698	0.0667688
Chr4	16055400	16055600	0.565162	0.342895	0.607275	0.429762	0.70001	0.527083	0.199107	0.375155
Chr4	16320900	16321100	0.034134	0.0251247	0.0426709	0.0316672	0.0194059	0.196757	0.0183724	0.028721
Chr4	16325300	16325700	0.0653239	0.0327597	0.0723637	0.0723	0.0754646	0.217675	0.0227439	0.0759486
Chr4	16377800	16378000	0.121044	0.167276	0.358562	0.358027	0.384625	0.248998	0.00816994	0.0808655
Chr4	16520600	16520900	0.0633516	0.0727012	0.0586206	0.119135	0.0861643	0.408088	0.00151515	0.0189184
Chr4	16572200	16572500	0.085035	0.0637141	0.10842	0.110005	0.106814	0.213629	0.0295984	0.0270755
Chr4	16572900	16573200	0.0868887	0.0908738	0.139924	0.079228	0.0844883	0.254226	0.00197628	0.0220674
Chr4	16705500	16705900	0.352539	0.15844	0.350471	0.222069	0.378178	0.292753	0.0201557	0.0808444
Chr4	16729200	16729400	0.237654	0.223152	0.31529	0.282946	0.301172	0.579684	0.150099	0.0671445
Chr4	16830800	16831000	0.288031	0.260912	0.307522	0.255655	0.274686	0.287042	0.0622911	0.0614607
Chr4	16863300	16864600	0.515839	0.373083	0.503857	0.436731	0.491835	0.232406	0.0206113	0.0475302
Chr4	16929300	16929500	0.145542	0.129726	0.055938	0.0817283	0.0924952	0.335273	0.00500001	0.0203653
Chr4	16951500	16951700	0.387141	0.340917	0.372334	0.399078	0.441685	0.515566	0.136918	0.0947358
Chr4	17081100	17081400	0.125596	0.0497961	0.0916095	0.0954229	0.0828204	0.274397	0.0370665	0.0463601
Chr4	17249400	17249600	0.411859	0.230303	0.40185	0.330558	0.391214	0.486721	0.0648962	0.11765
Chr4	17450700	17450900	0.323527	0.205188	0.299696	0.390598	0.399683	0.210659	0.0550926	0.0507054
Chr4	17501900	17502200	0.527559	0.294433	0.526205	0.438085	0.585517	0.361213	0.0496868	0.181393
Chr4	17638200	17638400	0.308613	0.27242	0.411898	0.330399	0.303632	0.459045	0.0701228	0.0413783
Chr4	17654900	17655100	0.403612	0.263103	0.394623	0.314067	0.32033	0.489102	0.0706757	0.163541
Chr4	18201300	18201800	0.158138	0.0788486	0.144623	0.131268	0.127886	0.190252	0.0149671	0.00962856
Chr4	18232400	18233100	0.291617	0.171197	0.268136	0.322516	0.343774	0.369687	0.0256503	0.0889799
Chr4	18247900	18248300	0.124816	0.0655098	0.0863159	0.107578	0.11216	0.232135	0.0121311	0.0702426
Chr4	18377600	18377900	0.360546	0.284045	0.435623	0.371459	0.367436	0.556891	0.02035	0.126674
Chr4	18532300	18532500	0.118146	0.335336	0.279727	0.251323	0.301642	0.352096	0.00185185	0.0344624
Chr4	18533500	18533700	0.405255	0.265064	0.368626	0.325946	0.336152	0.568577	0.0610462	0.0596302
Chr4	18584400	18584600	0.0677872	0.0891037	0.0772229	0.0698881	0.16293	0.12377	0.036051	0.0667249
Chr5	0	600	0.0430147	0.0651039	0.0255119	0.10039	0.0491049	0.16171	0.0293042	0.0390844
Chr5	56700	56900	0.0966475	0.115171	0.15577	0.219169	0.133395	0.481255	0.0374994	0.0509548
Chr5	64700	64900	0.146987	0.110887	0.104448	0.115061	0.133961	0.466657	0.12989	0.0715543
Chr5	70900	71300	0.0898733	0.0718772	0.0630472	0.129777	0.0650936	0.286071	0.0837993	0.161811
Chr5	91100	91300	0.109777	0.145464	0.0920459	0.168323	0.119567	0.586117	0.0312515	0.0428292
Chr5	112800	113500	0.46605	0.456417	0.532049	0.450228	0.498918	0.496811	0.142155	0.129702
Chr5	250100	251100	0.165482	0.127798	0.15179	0.184214	0.149337	0.424511	0.00429007	0.0172378
Chr5	317400	317600	0.390141	0.283837	0.316109	0.325387	0.40443	0.476398	0.143	0.0669477
Chr5	349900	350400	0.398211	0.249043	0.408522	0.34316	0.384741	0.339884	0.040695	0.0664137
Chr5	355800	356600	0.14036	0.101381	0.157813	0.179035	0.141534	0.259296	0.0330175	0.0601715
Chr5	393600	393900	0.248417	0.242883	0.375036	0.3619	0.35532	0.400776	0.158027	0.0423016
Chr5	394500	394700	0.484625	0.387015	0.462673	0.440187	0.39376	0.617352	0.20097	0.134286
Chr5	490100	490300	0.338461	0.228114	0.403795	0.280806	0.353885	0.356742	0.0403499	0.0833237
Chr5	490900	491100	0.575136	0.450762	0.548649	0.39574	0.532253	0.27825	0.0410272	0.0565389
Chr5	582300	582500	0.0404887	0.0502523	0.0637474	0.0885466	0.0961158	0.360062	0.0030754	0.190328
Chr5	661000	661200	0.332206	0.228934	0.29896	0.386965	0.308089	0.447216	0.0749935	0.0794451
Chr5	706800	707000	0.627973	0.467025	0.605765	0.528126	0.592144	0.485931	0.0756446	0.0843122
Chr5	743900	744200	0.206547	0.180671	0.291416	0.271654	0.358652	0.334608	0.104221	0.0860986
Chr5	745000	745200	0.532832	0.470554	0.537492	0.433812	0.457491	0.416282	0.102859	0.109231
Chr5	765800	766100	0.245001	0.19363	0.223294	0.185117	0.312622	0.544165	0.00734447	0.0728037
Chr5	1026600	1027000	0.0719091	0.0690869	0.0986195	0.126569	0.0846451	0.219878	0.0349431	0.0441232
Chr5	1063800	1064400	0.108433	0.0661997	0.116755	0.114243	0.107527	0.105824	0.0163441	0.0342263
Chr5	1067400	1067900	0.256627	0.165612	0.219487	0.206301	0.190687	0.280435	0.0665945	0.0883386
Chr5	1180900	1181100	0.280323	0.150083	0.360642	0.27625	0.254175	0.25142	0.00487589	0.0393394
Chr5	1486700	1486900	0.268825	0.120188	0.182771	0.144302	0.193956	0.243463	0.00280112	0.00806548
Chr5	1516200	1516400	0.0735399	0.0859051	0.0839322	0.173879	0.0599602	0.35459	0.0371575	0.0151004
Chr5	1518700	1519100	0.151624	0.187761	0.244841	0.214339	0.172571	0.518154	0.049481	0.176787
Chr5	1816900	1817100	0.0832588	0.0661787	0.0767928	0.0905498	0.0851065	0.1623	0.0765901	0.0482634
Chr5	1896600	1896800	0.524426	0.27194	0.441329	0.361672	0.472992	0.355446	0.016167	0.100976
Chr5	1897200	1898300	0.441652	0.400034	0.512781	0.414734	0.471704	0.284132	0.0387598	0.0796554
Chr5	2071500	2071700	0.131377	0.0883472	0.140973	0.175777	0.147839	0.494207	0.0343742	0.0506542
Chr5	2072000	2072600	0.0953817	0.0557421	0.0968297	0.092935	0.0856819	0.162071	0.0595491	0.077249
Chr5	2187800	2188000	0.238634	0.129527	0.178824	0.224734	0.272587	0.117169	0.00615385	0.0689904
Chr5	2188700	2189100	0.327544	0.245569	0.454978	0.320026	0.354631	0.18998	0.0209264	0.0416358
Chr5	2240100	2240300	0.288598	0.198616	0.228071	0.319991	0.310005	0.475106	0.0606947	0.0436599
Chr5	2276200	2276500	0.130128	0.105108	0.166835	0.196219	0.131244	0.443996	0.018108	0.0203438
Chr5	2347900	2348700	0.196093	0.119661	0.201535	0.139569	0.141892	0.240737	0.0395614	0.0636765
Chr5	2559900	2560200	0.0322607	0.069746	0.0413032	0.0735588	0.0143572	0.222333	0.0289589	0.0191472
Chr5	2605100	2605500	0.387779	0.302247	0.396239	0.290443	0.321237	0.273772	0.00894311	0.069722
Chr5	2860500	2860700	0.219053	0.154731	0.338907	0.265123	0.22711	0.582933	0.00491443	0.00581806
Chr5	3019200	3019600	0.315803	0.341832	0.441009	0.239448	0.382559	0.180753	0.0733422	0.0376587
Chr5	3114300	3114500	0.228154	0.123103	0.218243	0.195154	0.21396	0.328411	0.044581	0.165547
Chr5	3161700	3162100	0.337074	0.401482	0.287857	0.218251	0.263749	0.186615	0.0411306	0.0366513
Chr5	3373000	3373200	0.176082	0.180549	0.240143	0.172765	0.135911	0.39306	0.0341077	0.0176329
Chr5	3549900	3550100	0.264546	0.222603	0.25222	0.251759	0.159675	0.333425	0.0528029	0.108436
Chr5	3560700	3561000	0.0624485	0.0771128	0.0949816	0.0848761	0.0841882	0.165889	0.071599	0.0742885
Chr5	3566300	3566900	0.450994	0.319245	0.47414	0.342924	0.476366	0.388533	0.126215	0.0994797
Chr5	3688500	3688700	0.542326	0.345678	0.328674	0.386811	0.36749	0.39182	0.0104958	0.00654762
Chr5	3738400	3738700	0.0765042	0.0747133	0.075324	0.101049	0.112136	0.621649	0.0124932	0.00707071
Chr5	3903100	3903900	0.436193	0.274099	0.373182	0.33633	0.366711	0.323904	0.0746302	0.0934993
Chr5	3945000	3945300	0.354223	0.239787	0.303491	0.205695	0.20892	0.404021	0.0451561	0.0538965
Chr5	3946700	3946900	0.105134	0.0332101	0.233166	0.0514559	0.0392356	0.0585587	0.00464576	0
Chr5	4076700	4076900	0.0899661	0.055998	0.0906411	0.0663059	0.0812557	0.435567	0.00447197	0.0418347
Chr5	4208100	4208600	0.284917	0.254264	0.335705	0.27738	0.400656	0.4948	0.0253736	0.0719494
Chr5	4212600	4212800	0.195804	0.0603105	0.168051	0.220009	0.104545	0.37126	0.0542989	0.107131
Chr5	4313000	4313600	0.572749	0.517381	0.559856	0.476098	0.605106	0.221204	0.0450675	0.0430901
Chr5	4508200	4508500	0.28735	0.170696	0.326398	0.318123	0.349709	0.558095	0.00856757	0.0677961
Chr5	4529600	4530300	0.301734	0.228543	0.261023	0.262224	0.299509	0.193421	0.0392927	0.0576908
Chr5	4539900	4540100	0.104923	0.0495454	0.104928	0.21589	0.0641593	0.548856	0.00370729	0.015873
Chr5	4561200	4561400	0.107508	0.018322	0.0312433	0.058165	0.178135	0.222816	0.00601188	0.00859722
Chr5	4641600	4641800	0.110592	0.0830081	0.133605	0.137435	0.0915631	0.402714	0.0445027	0.00631313
Chr5	4737200	4737400	0.449197	0.258837	0.404414	0.516509	0.33763	0.210929	0.0300307	0.142641
Chr5	4776100	4776400	0.524081	0.511134	0.555712	0.589653	0.623539	0.639469	0.301214	0.226963
Chr5	4780300	4780500	0.505335	0.26892	0.533928	0.516793	0.565482	0.384043	0.0192365	0.101154
Chr5	4780900	4781900	0.485344	0.409131	0.526266	0.400887	0.495652	0.268952	0.0290079	0.0612617
Chr5	4936900	4937500	0.459978	0.303907	0.514317	0.449631	0.480889	0.507373	0.0735516	0.0967786
Chr5	4970700	4970900	0.473632	0.283913	0.397142	0.377962	0.524062	0.278957	0.0448569	0.049247
Chr5	5097500	5097700	0.242369	0.277253	0.258167	0.223597	0.230671	0.288584	0.0574903	0.0412532
Chr5	5111300	5111500	0.14497	0.169454	0.160003	0.173116	0.065648	0.467605	0.120069	0.0627454
Chr5	5114600	5114800	0.207114	0.167549	0.175155	0.259437	0.213764	0.397297	0.0275681	0.0482627
Chr5	5129100	5129500	0.511313	0.388838	0.362133	0.420376	0.462004	0.140944	0.0107071	0.0151601
Chr5	5155800	5156000	0.0897148	0.0866516	0.115598	0.153365	0.1158	0.442881	0.0139732	0.00496976
Chr5	5288400	5288600	0.0276193	0.0510753	0.131528	0.235653	0.194835	0.306207	0	0.0242475
Chr5	5352100	5352300	0.358214	0.285072	0.376728	0.249277	0.347336	0.558454	0.0963296	0.0794518
Chr5	5429000	5429600	0.505337	0.457797	0.497721	0.5001	0.499608	0.263705	0.0303289	0.126965
Chr5	5625100	5625600	0.601538	0.494646	0.642667	0.527218	0.516752	0.37621	0.123972	0.0815464
Chr5	5646500	5646700	0.149338	0.0728377	0.0722447	0.185801	0.104156	0.339872	0.0431216	0.123746
Chr5	5648000	5648200	0.50218	0.31572	0.489942	0.438065	0.402884	0.456867	0.0727153	0.110167
Chr5	5701300	5702100	0.310457	0.260384	0.342116	0.272575	0.301674	0.322669	0.0666065	0.110769
Chr5	5702800	5703000	0.0276147	0.0669648	0.118959	0.269513	0.215303	0.514579	0.0945306	0.0884407
Chr5	5749200	5749400	0.0842207	0.172973	0.176824	0.126889	0.216753	0.539532	0.0144135	0.00652676
Chr5	5785100	5785400	0.201166	0.130518	0.195664	0.212276	0.17883	0.387485	0.00883046	0.0211545
Chr5	5801300	5802100	0.324197	0.180675	0.339661	0.268083	0.282732	0.389792	0.0579649	0.0665969
Chr5	5969100	5970600	0.353819	0.305231	0.358811	0.367273	0.355572	0.26759	0.128192	0.149202
Chr5	5977300	5977500	0.556156	0.483424	0.525645	0.478349	0.531193	0.288166	0.0640633	0.0500678
Chr5	6171100	6171400	0.126793	0.0807214	0.0860006	0.0977687	0.089603	0.276169	0.0138427	0.0229706
Chr5	6212400	6212600	0.117068	0.0973155	0.105366	0.138539	0.0977822	0.368596	0.155047	0.170343
Chr5	6324900	6325200	0.0778222	0.0916465	0.0953705	0.171086	0.0735108	0.235256	0.0773587	0.100739
Chr5	6384200	6384500	0.140388	0.0429092	0.140075	0.0880134	0.0911713	0.446697	0.00372024	0.0324242
Chr5	6398000	6398400	0.300898	0.242347	0.277041	0.303954	0.242739	0.380321	0.217948	0.191484
Chr5	6419900	6420400	0.577875	0.311549	0.552563	0.458428	0.5326	0.413162	0.113908	0.0963643
Chr5	6460900	6461300	0.200482	0.175761	0.225737	0.191651	0.233363	0.417234	0.0836406	0.0655595
Chr5	6630700	6630900	0.568044	0.327657	0.514417	0.519058	0.47054	0.539462	0.179478	0.200624
Chr5	6635200	6635500	0.402746	0.368896	0.385135	0.406513	0.499527	0.379555	0.161565	0.136302
Chr5	6702000	6702400	0.550265	0.464369	0.576941	0.554859	0.594719	0.408464	0.0847527	0.12219
Chr5	6751400	6751600	0.116368	0.121689	0.163553	0.174506	0.192403	0.443594	0.0149713	0.0101643
Chr5	6869300	6869700	0.0713456	0.0336547	0.0664368	0.0317931	0.107796	0.178235	0.0137639	0.0114006
Chr5	6915300	6915700	0.235053	0.231088	0.260771	0.215387	0.238913	0.432418	0.136124	0.107852
Chr5	6926000	6926400	0.221841	0.194596	0.233783	0.194349	0.26422	0.249723	0.0512728	0.0410054
Chr5	6982200	6982500	0.123933	0.0729293	0.0679737	0.0717768	0.10938	0.278773	0.0227275	0.0174686
Chr5	6994900	6995200	0.436067	0.323194	0.411505	0.384504	0.353737	0.528849	0.0500296	0.0380593
Chr5	7056300	7056600	0.100886	0.0941391	0.109293	0.105244	0.0648028	0.219066	0.0310075	0.0940326
Chr5	7057500	7058000	0.462214	0.200653	0.234152	0.206385	0.242366	0.495987	0.148029	0.185327
Chr5	7070000	7070500	0.521364	0.382451	0.574525	0.444475	0.530396	0.29407	0.0712824	0.109132
Chr5	7097600	7097800	0.0760392	0.0699508	0.123626	0.0680827	0.0292091	0.175327	0.0182286	0.0326607
Chr5	7153300	7153500	0.573575	0.456521	0.532345	0.461408	0.527204	0.322201	0.0118464	0.047549
Chr5	7175700	7176200	0.258939	0.152363	0.269446	0.187911	0.273143	0.162059	0.0122443	0.0476337
[truncated: 443 more rows]
