# Supplementary material for: Targeted suppression of siRNA biogenesis in Arabidopsis pollen reveals distinct Pol IV activities in the sperm and vegetative cell lineages
Source: Research Square preprint supplement (doi:10.21203/rs.3.rs-2947716/v1), 2023-05-31
Supplement: Supplementary file 2 [file a21d1994c572299610bf3273.xlsx]

## Sheet: WT FTL vs nrpd1a-3 FTL
Differentially methylated regions (WT FTL vs nrpd1a-3 FTL)
chr	start	end	Id	type	family	superfamily	context	DMR
Chr1	18843900	18844200	AT1G50840	Gene	protein_coding	-	CG	Hypomethylated in nrpd1a-3 FTL
Chr1	19354300	19354354	AT1TE64110	TE	ATREP10D	RC/Helitron	CG	Hypomethylated in nrpd1a-3 FTL
Chr1	19354354	19354500	19354354-19354919	Intergenic	-	-	CG	Hypomethylated in nrpd1a-3 FTL
Chr1	19899500	19899700	AT1G53340	Gene	protein_coding	-	CG	Hypomethylated in nrpd1a-3 FTL
Chr1	20203800	20204000	AT1G54115	Gene	protein_coding	-	CG	Hypomethylated in nrpd1a-3 FTL
Chr1	21341800	21342300	AT1TE70480	TE	ATMUN2	DNA/MuDR	CG	Hypomethylated in nrpd1a-3 FTL
Chr1	21520900	21521100	AT1G58120	Gene	protein_coding	-	CG	Hypomethylated in nrpd1a-3 FTL
Chr1	21520900	21521100	AT1G58122	Gene	protein_coding	-	CG	Hypomethylated in nrpd1a-3 FTL
Chr1	21662400	21662483	21660054-21662483	Intergenic	-	-	CG	Hypomethylated in nrpd1a-3 FTL
Chr1	21662483	21662600	AT1TE71490	TE	ATREP10B	RC/Helitron	CG	Hypomethylated in nrpd1a-3 FTL
Chr1	21988600	21988900	AT1G59760	Gene	protein_coding	-	CG	Hypomethylated in nrpd1a-3 FTL
Chr1	22152600	22152900	AT1G60080	Gene	protein_coding	-	CG	Hypomethylated in nrpd1a-3 FTL
Chr1	22676700	22676900	AT1G61460	Gene	protein_coding	-	CG	Hypomethylated in nrpd1a-3 FTL
Chr1	23251700	23251900	AT1TE76640	TE	ATREP5	RC/Helitron	CG	Hypomethylated in nrpd1a-3 FTL
Chr1	23607800	23608000	AT1G63670	Gene	protein_coding	-	CG	Hypomethylated in nrpd1a-3 FTL
Chr1	23755500	23755800	23755437-23756840	Intergenic	-	-	CG	Hypomethylated in nrpd1a-3 FTL
Chr1	24082300	24082800	AT1G64790	Gene	protein_coding	-	CG	Hypomethylated in nrpd1a-3 FTL
Chr1	24134500	24134800	AT1G64970	Gene	protein_coding	-	CG	Hypomethylated in nrpd1a-3 FTL
Chr1	24572600	24572800	AT1G65990	Gene	protein_coding	-	CG	Hypomethylated in nrpd1a-3 FTL
Chr1	24682900	24682962	AT1TE81065	TE	BRODYAGA2	DNA/MuDR	CG	Hypomethylated in nrpd1a-3 FTL
Chr1	24682962	24683006	24682962-24683006	Intergenic	-	-	CG	Hypomethylated in nrpd1a-3 FTL
Chr1	24683006	24683100	AT1G66235	Gene	protein_coding	-	CG	Hypomethylated in nrpd1a-3 FTL
Chr1	24823200	24823214	AT1TE81525	TE	HELITRONY3	RC/Helitron	CG	Hypomethylated in nrpd1a-3 FTL
Chr1	24823214	24823400	24823214-24824459	Intergenic	-	-	CG	Hypomethylated in nrpd1a-3 FTL
Chr1	24910800	24911000	AT1G66780	Gene	protein_coding	-	CG	Hypomethylated in nrpd1a-3 FTL
Chr1	24940900	24941200	24940530-24942188	Intergenic	-	-	CG	Hypomethylated in nrpd1a-3 FTL
Chr1	25194300	25194600	AT1G67300	Gene	protein_coding	-	CG	Hypomethylated in nrpd1a-3 FTL
Chr1	27287400	27287600	AT1G72480	Gene	protein_coding	-	CG	Hypomethylated in nrpd1a-3 FTL
Chr1	14284000	14284300	14283310-14286370	Intergenic	-	-	CG	Hypermethylated in nrpd1a-3 FTL
Chr1	20378000	20378200	AT1G54560	Gene	protein_coding	-	CG	Hypermethylated in nrpd1a-3 FTL
Chr1	20478300	20478500	AT1G54930	Gene	protein_coding	-	CG	Hypermethylated in nrpd1a-3 FTL
Chr1	21046800	21047000	AT1G56230	Gene	protein_coding	-	CG	Hypermethylated in nrpd1a-3 FTL
Chr1	21213800	21214000	AT1G56610	Gene	protein_coding	-	CG	Hypermethylated in nrpd1a-3 FTL
Chr1	21264800	21265000	AT1G56720	Gene	protein_coding	-	CG	Hypermethylated in nrpd1a-3 FTL
Chr1	21621000	21621300	AT1G58280	Gene	protein_coding	-	CG	Hypermethylated in nrpd1a-3 FTL
Chr1	21675000	21675300	21672494-21675558	Intergenic	-	-	CG	Hypermethylated in nrpd1a-3 FTL
Chr1	21702000	21702400	AT1G58410	Gene	protein_coding	-	CG	Hypermethylated in nrpd1a-3 FTL
Chr1	21964900	21965200	21961235-21968071	Intergenic	-	-	CG	Hypermethylated in nrpd1a-3 FTL
Chr1	22177400	22177600	AT1G60140	Gene	protein_coding	-	CG	Hypermethylated in nrpd1a-3 FTL
Chr1	22508800	22509100	AT1G61100	Gene	protein_coding	-	CG	Hypermethylated in nrpd1a-3 FTL
Chr1	22566200	22566400	AT1G61210	Gene	protein_coding	-	CG	Hypermethylated in nrpd1a-3 FTL
Chr1	22567500	22567800	AT1G61210	Gene	protein_coding	-	CG	Hypermethylated in nrpd1a-3 FTL
Chr1	22608400	22608800	AT1G61300	Gene	protein_coding	-	CG	Hypermethylated in nrpd1a-3 FTL
Chr1	22614100	22614500	AT1G61310	Gene	protein_coding	-	CG	Hypermethylated in nrpd1a-3 FTL
Chr1	22615000	22615300	AT1G61310	Gene	protein_coding	-	CG	Hypermethylated in nrpd1a-3 FTL
Chr1	22618100	22618300	AT1G61320	Gene	protein_coding	-	CG	Hypermethylated in nrpd1a-3 FTL
Chr1	22687900	22688200	AT1G61490	Gene	protein_coding	-	CG	Hypermethylated in nrpd1a-3 FTL
Chr1	22815100	22815300	AT1G61790	Gene	protein_coding	-	CG	Hypermethylated in nrpd1a-3 FTL
Chr1	23007900	23008100	AT1G62280	Gene	protein_coding	-	CG	Hypermethylated in nrpd1a-3 FTL
Chr1	23033900	23034100	23031816-23036039	Intergenic	-	-	CG	Hypermethylated in nrpd1a-3 FTL
Chr1	23302000	23302200	AT1G62914	Gene	protein_coding	-	CG	Hypermethylated in nrpd1a-3 FTL
Chr1	23306900	23307600	AT1G62930	Gene	protein_coding	-	CG	Hypermethylated in nrpd1a-3 FTL
Chr1	23386000	23386700	AT1G63070	Gene	protein_coding	-	CG	Hypermethylated in nrpd1a-3 FTL
Chr1	23420100	23420800	AT1G63150	Gene	protein_coding	-	CG	Hypermethylated in nrpd1a-3 FTL
Chr1	23484500	23484900	AT1G63300	Gene	protein_coding	-	CG	Hypermethylated in nrpd1a-3 FTL
Chr1	23851200	23851400	AT1TE78490	TE	Unassigned	Unassigned	CG	Hypermethylated in nrpd1a-3 FTL
Chr1	23853300	23853700	AT1G64280	Gene	protein_coding	-	CG	Hypermethylated in nrpd1a-3 FTL
Chr1	24422300	24422600	AT1G65670	Gene	protein_coding	-	CG	Hypermethylated in nrpd1a-3 FTL
Chr1	24454700	24454752	24454301-24454752	Intergenic	-	-	CG	Hypermethylated in nrpd1a-3 FTL
Chr1	24454752	24454900	AT1TE80320	TE	ATLINE1_1	LINE/L1	CG	Hypermethylated in nrpd1a-3 FTL
Chr1	24471600	24471900	AT1G65790	Gene	protein_coding	-	CG	Hypermethylated in nrpd1a-3 FTL
Chr1	24492200	24492500	AT1G65840	Gene	protein_coding	-	CG	Hypermethylated in nrpd1a-3 FTL
Chr1	24509200	24509600	AT1G65880	Gene	protein_coding	-	CG	Hypermethylated in nrpd1a-3 FTL
Chr1	25215900	25216100	25215174-25226572	Intergenic	-	-	CG	Hypermethylated in nrpd1a-3 FTL
Chr5	12557300	12557466	12555368-12557466	Intergenic	-	-	CG	Hypermethylated in nrpd1a-3 FTL
Chr5	12557466	12557500	AT5TE44475	TE	ATREP15	RC/Helitron	CG	Hypermethylated in nrpd1a-3 FTL
Chr1	21341900	21342400	AT1TE70480	TE	ATMUN2	DNA/MuDR	CHG	Hypomethylated in nrpd1a-3 FTL
Chr1	24082300	24082700	AT1G64790	Gene	protein_coding	-	CHG	Hypomethylated in nrpd1a-3 FTL
Chr5	8178800	8179000	AT5TE29590	TE	SIMPLEGUY1	DNA/Harbinger	CHG	Hypomethylated in nrpd1a-3 FTL
Chr1	21046400	21047000	AT1G56230	Gene	protein_coding	-	CHG	Hypermethylated in nrpd1a-3 FTL
Chr1	23355600	23357400	AT1G63020	Gene	protein_coding	-	CHG	Hypermethylated in nrpd1a-3 FTL
Chr1	23389300	23389600	AT1G63080	Gene	protein_coding	-	CHG	Hypermethylated in nrpd1a-3 FTL
Chr1	17100	18000	AT1TE00025	TE	ATREP3	RC/Helitron	CHH	Hypomethylated in nrpd1a-3 FTL
Chr1	256100	256300	AT1TE00825	TE	ATHPOGON3	DNA/Pogo	CHH	Hypomethylated in nrpd1a-3 FTL
Chr1	540700	540900	AT1TE01750	TE	ATREP2	RC/Helitron	CHH	Hypomethylated in nrpd1a-3 FTL
Chr1	587500	588000	AT1TE01910	TE	ATREP2	RC/Helitron	CHH	Hypomethylated in nrpd1a-3 FTL
Chr1	696900	697300	AT1TE02265	TE	ATREP1	RC/Helitron	CHH	Hypomethylated in nrpd1a-3 FTL
Chr1	888700	888900	887956-890156	Intergenic	-	-	CHH	Hypomethylated in nrpd1a-3 FTL
Chr1	1276100	1276600	AT1TE04165	TE	ATREP7	RC/Helitron	CHH	Hypomethylated in nrpd1a-3 FTL
Chr1	1523100	1523400	1522971-1525601	Intergenic	-	-	CHH	Hypomethylated in nrpd1a-3 FTL
Chr1	1976500	1977100	AT1TE06480	TE	ATREP3	RC/Helitron	CHH	Hypomethylated in nrpd1a-3 FTL
Chr1	2587500	2587800	AT1TE08420	TE	ATREP2	RC/Helitron	CHH	Hypomethylated in nrpd1a-3 FTL
Chr1	3074000	3074300	AT1TE09970	TE	ATREP3	RC/Helitron	CHH	Hypomethylated in nrpd1a-3 FTL
Chr1	3342700	3343000	AT1TE10865	TE	ATREP13	RC/Helitron	CHH	Hypomethylated in nrpd1a-3 FTL
Chr1	4112100	4112500	AT1TE13375	TE	ARNOLDY1	DNA/MuDR	CHH	Hypomethylated in nrpd1a-3 FTL
Chr1	4407400	4407900	AT1TE14315	TE	META1	LTR/Copia	CHH	Hypomethylated in nrpd1a-3 FTL
Chr1	4409600	4410200	AT1TE14315	TE	META1	LTR/Copia	CHH	Hypomethylated in nrpd1a-3 FTL
Chr1	4583100	4583400	AT1TE14865	TE	ATREP2	RC/Helitron	CHH	Hypomethylated in nrpd1a-3 FTL
Chr1	4770300	4770663	AT1TE15445	TE	ATREP2	RC/Helitron	CHH	Hypomethylated in nrpd1a-3 FTL
Chr1	4770663	4770664	4770663-4770664	Intergenic	-	-	CHH	Hypomethylated in nrpd1a-3 FTL
Chr1	4770664	4770700	AT1TE15450	TE	ATREP2A	RC/Helitron	CHH	Hypomethylated in nrpd1a-3 FTL
Chr1	4786800	4787200	AT1TE15510	TE	ATREP3	RC/Helitron	CHH	Hypomethylated in nrpd1a-3 FTL
Chr1	4966600	4966900	AT1TE16080	TE	ATREP6	RC/Helitron	CHH	Hypomethylated in nrpd1a-3 FTL
Chr1	5531300	5531700	AT1TE17875	TE	ATREP2A	RC/Helitron	CHH	Hypomethylated in nrpd1a-3 FTL
Chr1	5657500	5657736	AT1TE18285	TE	ATREP13	RC/Helitron	CHH	Hypomethylated in nrpd1a-3 FTL
Chr1	5657736	5657737	5657736-5657737	Intergenic	-	-	CHH	Hypomethylated in nrpd1a-3 FTL
Chr1	5657737	5657800	AT1TE18290	TE	ATREP10B	RC/Helitron	CHH	Hypomethylated in nrpd1a-3 FTL
Chr1	5863300	5863500	AT1TE18955	TE	ATREP2	RC/Helitron	CHH	Hypomethylated in nrpd1a-3 FTL
Chr1	5863431	5863500	AT1G17147	Gene	protein_coding	-	CHH	Hypomethylated in nrpd1a-3 FTL
Chr1	6074900	6075400	AT1TE19635	TE	ATREP13	RC/Helitron	CHH	Hypomethylated in nrpd1a-3 FTL
Chr1	6218600	6219200	AT1TE20110	TE	ATREP2	RC/Helitron	CHH	Hypomethylated in nrpd1a-3 FTL
Chr1	6236800	6237200	AT1G18130	Gene	protein_coding	-	CHH	Hypomethylated in nrpd1a-3 FTL
Chr1	6236800	6237200	AT1TE20195	TE	ARNOLDY2	DNA/MuDR	CHH	Hypomethylated in nrpd1a-3 FTL
Chr1	6454900	6455100	AT1TE20925	TE	SIMPLEHAT2	DNA/HAT	CHH	Hypomethylated in nrpd1a-3 FTL
Chr1	6538700	6539400	AT1TE21210	TE	META1	LTR/Copia	CHH	Hypomethylated in nrpd1a-3 FTL
Chr1	6736100	6736400	AT1TE21790	TE	ATREP3	RC/Helitron	CHH	Hypomethylated in nrpd1a-3 FTL
Chr1	7036100	7036800	AT1TE22750	TE	ATREP3	RC/Helitron	CHH	Hypomethylated in nrpd1a-3 FTL
Chr1	7201700	7201900	AT1TE23270	TE	TNAT1A	DNA	CHH	Hypomethylated in nrpd1a-3 FTL
Chr1	7281800	7282400	AT1TE23505	TE	ATREP5	RC/Helitron	CHH	Hypomethylated in nrpd1a-3 FTL
Chr1	7722100	7722400	AT1TE24850	TE	ATCOPIA78	LTR/Copia	CHH	Hypomethylated in nrpd1a-3 FTL
Chr1	7833500	7833900	AT1TE25210	TE	ATREP7	RC/Helitron	CHH	Hypomethylated in nrpd1a-3 FTL
Chr1	8114900	8116700	AT1TE26120	TE	ATREP3	RC/Helitron	CHH	Hypomethylated in nrpd1a-3 FTL
Chr1	8169400	8169457	8169267-8169457	Intergenic	-	-	CHH	Hypomethylated in nrpd1a-3 FTL
Chr1	8169457	8169558	AT1TE26300	TE	ATREP7	RC/Helitron	CHH	Hypomethylated in nrpd1a-3 FTL
Chr1	8169558	8169559	8169558-8169559	Intergenic	-	-	CHH	Hypomethylated in nrpd1a-3 FTL
Chr1	8169559	8169600	AT1TE26305	TE	ATREP7	RC/Helitron	CHH	Hypomethylated in nrpd1a-3 FTL
Chr1	8236300	8236800	AT1TE26515	TE	ATREP8	RC/Helitron	CHH	Hypomethylated in nrpd1a-3 FTL
Chr1	8291100	8291500	AT1TE26735	TE	ATREP3	RC/Helitron	CHH	Hypomethylated in nrpd1a-3 FTL
Chr1	8457600	8457900	AT1TE27295	TE	VANDAL6	DNA/MuDR	CHH	Hypomethylated in nrpd1a-3 FTL
Chr1	8539000	8539400	AT1TE27550	TE	ATREP1	RC/Helitron	CHH	Hypomethylated in nrpd1a-3 FTL
Chr1	9005500	9005800	AT1TE29060	TE	VANDAL2	DNA/MuDR	CHH	Hypomethylated in nrpd1a-3 FTL
Chr1	9205000	9205113	AT1TE29665	TE	HELITRONY2	RC/Helitron	CHH	Hypomethylated in nrpd1a-3 FTL
Chr1	9205113	9205200	9205113-9205730	Intergenic	-	-	CHH	Hypomethylated in nrpd1a-3 FTL
Chr1	9755200	9755600	9753952-9756656	Intergenic	-	-	CHH	Hypomethylated in nrpd1a-3 FTL
Chr1	9756500	9756656	9753952-9756656	Intergenic	-	-	CHH	Hypomethylated in nrpd1a-3 FTL
Chr1	9756656	9756700	AT1TE31410	TE	ATCOPIA6	LTR/Copia	CHH	Hypomethylated in nrpd1a-3 FTL
Chr1	9756674	9756700	AT1G28000	Gene	protein_coding	-	CHH	Hypomethylated in nrpd1a-3 FTL
Chr1	9817200	9817800	AT1TE31590	TE	ATREP3	RC/Helitron	CHH	Hypomethylated in nrpd1a-3 FTL
Chr1	9818100	9818300	AT1TE31590	TE	ATREP3	RC/Helitron	CHH	Hypomethylated in nrpd1a-3 FTL
Chr1	9865400	9865600	AT1TE31770	TE	ATREP3	RC/Helitron	CHH	Hypomethylated in nrpd1a-3 FTL
Chr1	10239900	10240195	AT1TE33075	TE	ATREP1	RC/Helitron	CHH	Hypomethylated in nrpd1a-3 FTL
Chr1	10240195	10240196	10240195-10240196	Intergenic	-	-	CHH	Hypomethylated in nrpd1a-3 FTL
Chr1	10240196	10240200	AT1TE33080	TE	ATREP1	RC/Helitron	CHH	Hypomethylated in nrpd1a-3 FTL
Chr1	10348000	10348300	AT1G29620	Gene	protein_coding	-	CHH	Hypomethylated in nrpd1a-3 FTL
Chr1	10348000	10348300	AT1TE33455	TE	VANDAL5A	DNA/MuDR	CHH	Hypomethylated in nrpd1a-3 FTL
Chr1	10591400	10591800	AT1TE34255	TE	ATREP2	RC/Helitron	CHH	Hypomethylated in nrpd1a-3 FTL
Chr1	10652600	10652800	AT1TE34445	TE	ATREP11	RC/Helitron	CHH	Hypomethylated in nrpd1a-3 FTL
Chr1	10867200	10867500	AT1TE35100	TE	ATREP10D	RC/Helitron	CHH	Hypomethylated in nrpd1a-3 FTL
Chr1	10867200	10867500	AT1TE35105	TE	ATREP13	RC/Helitron	CHH	Hypomethylated in nrpd1a-3 FTL
Chr1	10931000	10931300	AT1TE35305	TE	VANDAL8	DNA/MuDR	CHH	Hypomethylated in nrpd1a-3 FTL
Chr1	10932200	10932400	AT1TE35325	TE	TNAT1A	DNA	CHH	Hypomethylated in nrpd1a-3 FTL
Chr1	11700100	11700800	AT1TE37890	TE	ATREP3	RC/Helitron	CHH	Hypomethylated in nrpd1a-3 FTL
Chr1	11701200	11701700	AT1TE37890	TE	ATREP3	RC/Helitron	CHH	Hypomethylated in nrpd1a-3 FTL
Chr1	11803800	11804000	AT1TE38245	TE	ATREP2	RC/Helitron	CHH	Hypomethylated in nrpd1a-3 FTL
Chr1	11895800	11896100	AT1TE38530	TE	ARNOLD2	DNA/MuDR	CHH	Hypomethylated in nrpd1a-3 FTL
Chr1	12240600	12240900	AT1TE39755	TE	ATREP2	RC/Helitron	CHH	Hypomethylated in nrpd1a-3 FTL
Chr1	12500400	12500600	AT1TE40690	TE	ATHPOGON1	DNA/Pogo	CHH	Hypomethylated in nrpd1a-3 FTL
Chr1	12562900	12563200	AT1TE40925	TE	ATREP3	RC/Helitron	CHH	Hypomethylated in nrpd1a-3 FTL
Chr1	12618800	12619100	AT1TE41170	TE	ATREP1	RC/Helitron	CHH	Hypomethylated in nrpd1a-3 FTL
Chr1	12855000	12855065	AT1TE41845	TE	ATREP3	RC/Helitron	CHH	Hypomethylated in nrpd1a-3 FTL
Chr1	12855065	12855066	12855065-12855066	Intergenic	-	-	CHH	Hypomethylated in nrpd1a-3 FTL
Chr1	12855066	12855200	AT1TE41850	TE	ATREP3	RC/Helitron	CHH	Hypomethylated in nrpd1a-3 FTL
Chr1	13017100	13017600	AT1TE42430	TE	ATREP3	RC/Helitron	CHH	Hypomethylated in nrpd1a-3 FTL
Chr1	13058800	13059100	AT1TE42635	TE	ATREP3	RC/Helitron	CHH	Hypomethylated in nrpd1a-3 FTL
Chr1	13059500	13060400	AT1TE42635	TE	ATREP3	RC/Helitron	CHH	Hypomethylated in nrpd1a-3 FTL
Chr1	13495600	13495900	AT1TE44155	TE	ATREP2	RC/Helitron	CHH	Hypomethylated in nrpd1a-3 FTL
Chr1	13507600	13507779	AT1TE44225	TE	ATHILA4B_LTR	LTR/Gypsy	CHH	Hypomethylated in nrpd1a-3 FTL
Chr1	13507779	13507780	13507779-13507780	Intergenic	-	-	CHH	Hypomethylated in nrpd1a-3 FTL
Chr1	13507780	13508000	AT1TE44230	TE	ATGP1	LTR/Gypsy	CHH	Hypomethylated in nrpd1a-3 FTL
Chr1	13905200	13905900	AT1TE45635	TE	ARNOLDY1	DNA/MuDR	CHH	Hypomethylated in nrpd1a-3 FTL
Chr1	14011600	14011800	AT1TE46030	TE	ATREP11	RC/Helitron	CHH	Hypomethylated in nrpd1a-3 FTL
Chr1	14299200	14299500	AT1TE46950	TE	ATREP3	RC/Helitron	CHH	Hypomethylated in nrpd1a-3 FTL
Chr1	14737600	14737900	14717861-14746646	Intergenic	-	-	CHH	Hypomethylated in nrpd1a-3 FTL
Chr1	15126900	15127167	AT1TE49570	TE	ATREP18	DNA	CHH	Hypomethylated in nrpd1a-3 FTL
Chr1	15127167	15127168	15127167-15127168	Intergenic	-	-	CHH	Hypomethylated in nrpd1a-3 FTL
Chr1	15127168	15127200	AT1TE49580	TE	ATREP18	DNA	CHH	Hypomethylated in nrpd1a-3 FTL
Chr1	15635300	15635500	AT1TE51465	TE	HELITRONY3	RC/Helitron	CHH	Hypomethylated in nrpd1a-3 FTL
Chr1	15939400	15939700	AT1TE52535	TE	ATREP3	RC/Helitron	CHH	Hypomethylated in nrpd1a-3 FTL
Chr1	15940900	15941100	AT1TE52535	TE	ATREP3	RC/Helitron	CHH	Hypomethylated in nrpd1a-3 FTL
Chr1	16325500	16326500	AT1TE53750	TE	ATREP3	RC/Helitron	CHH	Hypomethylated in nrpd1a-3 FTL
Chr1	16400800	16401000	AT1TE54020	TE	ATREP2	RC/Helitron	CHH	Hypomethylated in nrpd1a-3 FTL
Chr1	16592500	16592562	AT1TE54670	TE	ATREP5	RC/Helitron	CHH	Hypomethylated in nrpd1a-3 FTL
Chr1	16592562	16592563	16592562-16592563	Intergenic	-	-	CHH	Hypomethylated in nrpd1a-3 FTL
Chr1	16592563	16592900	AT1TE54675	TE	ATREP5	RC/Helitron	CHH	Hypomethylated in nrpd1a-3 FTL
Chr1	16806500	16807000	AT1TE55590	TE	ATREP3	RC/Helitron	CHH	Hypomethylated in nrpd1a-3 FTL
Chr1	16825000	16825200	AT1TE55670	TE	ATREP3	RC/Helitron	CHH	Hypomethylated in nrpd1a-3 FTL
Chr1	16825900	16826200	AT1TE55670	TE	ATREP3	RC/Helitron	CHH	Hypomethylated in nrpd1a-3 FTL
Chr1	16904100	16904400	AT1TE55985	TE	ATREP3	RC/Helitron	CHH	Hypomethylated in nrpd1a-3 FTL
Chr1	16966500	16966900	AT1TE56170	TE	ATREP5	RC/Helitron	CHH	Hypomethylated in nrpd1a-3 FTL
Chr1	16967800	16968100	AT1TE56170	TE	ATREP5	RC/Helitron	CHH	Hypomethylated in nrpd1a-3 FTL
Chr1	16988200	16988400	AT1TE56255	TE	ATREP5	RC/Helitron	CHH	Hypomethylated in nrpd1a-3 FTL
Chr1	16989100	16989500	AT1TE56255	TE	ATREP5	RC/Helitron	CHH	Hypomethylated in nrpd1a-3 FTL
Chr1	16988200	16988400	AT1TE56260	TE	ATREP5	RC/Helitron	CHH	Hypomethylated in nrpd1a-3 FTL
Chr1	16989100	16989500	AT1TE56260	TE	ATREP5	RC/Helitron	CHH	Hypomethylated in nrpd1a-3 FTL
Chr1	17502500	17502800	AT1TE58000	TE	ATREP2	RC/Helitron	CHH	Hypomethylated in nrpd1a-3 FTL
Chr1	17552100	17552600	AT1TE58195	TE	ATREP3	RC/Helitron	CHH	Hypomethylated in nrpd1a-3 FTL
Chr1	17552100	17552174	AT1TE58205	TE	ATHATN7	DNA/HAT	CHH	Hypomethylated in nrpd1a-3 FTL
Chr1	17605500	17605501	17604559-17605501	Intergenic	-	-	CHH	Hypomethylated in nrpd1a-3 FTL
Chr1	17605501	17605900	AT1TE58430	TE	ATREP2A	RC/Helitron	CHH	Hypomethylated in nrpd1a-3 FTL
Chr1	17714300	17714500	AT1TE58825	TE	ATGP1	LTR/Gypsy	CHH	Hypomethylated in nrpd1a-3 FTL
Chr1	17900100	17900500	AT1TE59415	TE	ATREP3	RC/Helitron	CHH	Hypomethylated in nrpd1a-3 FTL
Chr1	18320600	18320603	18320106-18320603	Intergenic	-	-	CHH	Hypomethylated in nrpd1a-3 FTL
Chr1	18320603	18320669	AT1TE60720	TE	ATREP7	RC/Helitron	CHH	Hypomethylated in nrpd1a-3 FTL
Chr1	18320669	18320670	18320669-18320670	Intergenic	-	-	CHH	Hypomethylated in nrpd1a-3 FTL
Chr1	18320670	18320900	AT1TE60725	TE	ATREP19	DNA	CHH	Hypomethylated in nrpd1a-3 FTL
Chr1	18551600	18552100	AT1G50060	Gene	protein_coding	-	CHH	Hypomethylated in nrpd1a-3 FTL
Chr1	18551600	18552100	AT1TE61465	TE	ATHPOGON1	DNA/Pogo	CHH	Hypomethylated in nrpd1a-3 FTL
Chr1	18626800	18626811	AT1TE61730	TE	ATREP3	RC/Helitron	CHH	Hypomethylated in nrpd1a-3 FTL
Chr1	18626811	18626814	18626811-18626814	Intergenic	-	-	CHH	Hypomethylated in nrpd1a-3 FTL
Chr1	18626814	18627300	AT1TE61735	TE	ATHPOGON1	DNA/Pogo	CHH	Hypomethylated in nrpd1a-3 FTL
Chr1	18790200	18790700	AT1TE62285	TE	ATREP3	RC/Helitron	CHH	Hypomethylated in nrpd1a-3 FTL
Chr1	18791200	18791400	AT1TE62285	TE	ATREP3	RC/Helitron	CHH	Hypomethylated in nrpd1a-3 FTL
Chr1	19064300	19064500	AT1TE63170	TE	ATREP3	RC/Helitron	CHH	Hypomethylated in nrpd1a-3 FTL
Chr1	19173000	19173800	AT1TE63525	TE	ATREP3	RC/Helitron	CHH	Hypomethylated in nrpd1a-3 FTL
Chr1	19327300	19327500	AT1TE64055	TE	ATREP3	RC/Helitron	CHH	Hypomethylated in nrpd1a-3 FTL
Chr1	19769100	19769300	AT1TE65360	TE	ATREP3	RC/Helitron	CHH	Hypomethylated in nrpd1a-3 FTL
Chr1	19769100	19769300	AT1TE65365	TE	ATREP2	RC/Helitron	CHH	Hypomethylated in nrpd1a-3 FTL
Chr1	19780500	19780700	19779373-19781368	Intergenic	-	-	CHH	Hypomethylated in nrpd1a-3 FTL
Chr1	19994400	19995300	AT1TE66090	TE	ATREP3	RC/Helitron	CHH	Hypomethylated in nrpd1a-3 FTL
Chr1	20278500	20278700	AT1TE67005	TE	ATHPOGON1	DNA/Pogo	CHH	Hypomethylated in nrpd1a-3 FTL
Chr1	21335900	21336100	AT1TE70470	TE	ATREP2A	RC/Helitron	CHH	Hypomethylated in nrpd1a-3 FTL
Chr1	21428200	21428500	AT1TE70735	TE	ATREP13	RC/Helitron	CHH	Hypomethylated in nrpd1a-3 FTL
Chr1	21529400	21529700	AT1TE71045	TE	ATCOPIA78	LTR/Copia	CHH	Hypomethylated in nrpd1a-3 FTL
Chr1	21739200	21739600	AT1TE71725	TE	HELITRONY3	RC/Helitron	CHH	Hypomethylated in nrpd1a-3 FTL
Chr1	21918600	21919000	AT1TE72325	TE	ATREP1	RC/Helitron	CHH	Hypomethylated in nrpd1a-3 FTL
Chr1	21918600	21918995	AT1TE72330	TE	ATREP2	RC/Helitron	CHH	Hypomethylated in nrpd1a-3 FTL
Chr1	22163600	22163800	AT1TE73175	TE	VANDAL22	DNA/MuDR	CHH	Hypomethylated in nrpd1a-3 FTL
Chr1	22621200	22622300	AT1TE74615	TE	ATREP3	RC/Helitron	CHH	Hypomethylated in nrpd1a-3 FTL
Chr1	22828700	22829000	AT1TE75245	TE	ATREP13	RC/Helitron	CHH	Hypomethylated in nrpd1a-3 FTL
Chr1	22993200	22994000	AT1TE75780	TE	ATREP3	RC/Helitron	CHH	Hypomethylated in nrpd1a-3 FTL
Chr1	23125300	23125600	AT1TE76235	TE	ATREP2	RC/Helitron	CHH	Hypomethylated in nrpd1a-3 FTL
Chr1	23174100	23174700	AT1G62580	Gene	protein_coding	-	CHH	Hypomethylated in nrpd1a-3 FTL
Chr1	23174100	23174556	AT1TE76395	TE	ATREP3	RC/Helitron	CHH	Hypomethylated in nrpd1a-3 FTL
Chr1	23174564	23174700	AT1TE76400	TE	ATREP10A	RC/Helitron	CHH	Hypomethylated in nrpd1a-3 FTL
Chr1	23214900	23215400	AT1TE76530	TE	ATREP3	RC/Helitron	CHH	Hypomethylated in nrpd1a-3 FTL
Chr1	23553800	23554100	AT1TE77560	TE	ATREP3	RC/Helitron	CHH	Hypomethylated in nrpd1a-3 FTL
Chr1	23710800	23711300	AT1G63870	Gene	protein_coding	-	CHH	Hypomethylated in nrpd1a-3 FTL
Chr1	23710800	23711252	AT1TE78070	TE	HELITRONY3	RC/Helitron	CHH	Hypomethylated in nrpd1a-3 FTL
Chr1	23711253	23711300	AT1TE78075	TE	VANDAL22	DNA/MuDR	CHH	Hypomethylated in nrpd1a-3 FTL
Chr1	23876800	23877200	AT1TE78560	TE	ATREP3	RC/Helitron	CHH	Hypomethylated in nrpd1a-3 FTL
Chr1	24027200	24027800	AT1TE79030	TE	ATREP11	RC/Helitron	CHH	Hypomethylated in nrpd1a-3 FTL
Chr1	24577200	24577400	AT1TE80725	TE	ATDNATA1	DNA/Mariner	CHH	Hypomethylated in nrpd1a-3 FTL
Chr1	24645900	24646100	AT1TE80950	TE	ATREP2	RC/Helitron	CHH	Hypomethylated in nrpd1a-3 FTL
Chr1	24718500	24718800	AT1TE81195	TE	ATREP2	RC/Helitron	CHH	Hypomethylated in nrpd1a-3 FTL
Chr1	24733100	24733300	AT1TE81245	TE	ATHPOGON1	DNA/Pogo	CHH	Hypomethylated in nrpd1a-3 FTL
Chr1	24741500	24741700	AT1TE81275	TE	HELITRONY3	RC/Helitron	CHH	Hypomethylated in nrpd1a-3 FTL
Chr1	25357900	25358300	AT1TE83220	TE	ATREP2A	RC/Helitron	CHH	Hypomethylated in nrpd1a-3 FTL
Chr1	25779700	25780236	AT1TE84520	TE	ATREP2	RC/Helitron	CHH	Hypomethylated in nrpd1a-3 FTL
Chr1	25780236	25780237	25780236-25780237	Intergenic	-	-	CHH	Hypomethylated in nrpd1a-3 FTL
Chr1	25780237	25780278	AT1TE84525	TE	ATREP2	RC/Helitron	CHH	Hypomethylated in nrpd1a-3 FTL
Chr1	25780278	25780279	25780278-25780279	Intergenic	-	-	CHH	Hypomethylated in nrpd1a-3 FTL
Chr1	25780279	25780300	AT1TE84530	TE	HELITRONY1B	RC/Helitron	CHH	Hypomethylated in nrpd1a-3 FTL
Chr1	26169500	26170100	AT1TE85730	TE	ATREP3	RC/Helitron	CHH	Hypomethylated in nrpd1a-3 FTL
Chr1	26170700	26171479	AT1TE85730	TE	ATREP3	RC/Helitron	CHH	Hypomethylated in nrpd1a-3 FTL
Chr1	26171479	26171480	26171479-26171480	Intergenic	-	-	CHH	Hypomethylated in nrpd1a-3 FTL
Chr1	26171480	26171500	AT1TE85735	TE	ATREP3	RC/Helitron	CHH	Hypomethylated in nrpd1a-3 FTL
Chr1	26880400	26880722	AT1TE87965	TE	ATREP11	RC/Helitron	CHH	Hypomethylated in nrpd1a-3 FTL
Chr1	26880722	26880723	26880722-26880723	Intergenic	-	-	CHH	Hypomethylated in nrpd1a-3 FTL
Chr1	26880723	26880900	AT1TE87970	TE	ATREP2	RC/Helitron	CHH	Hypomethylated in nrpd1a-3 FTL
Chr1	27240900	27241200	AT1TE89135	TE	ATREP2	RC/Helitron	CHH	Hypomethylated in nrpd1a-3 FTL
Chr1	28161200	28161500	AT1TE92165	TE	ATREP3	RC/Helitron	CHH	Hypomethylated in nrpd1a-3 FTL
Chr1	28161800	28162200	AT1TE92165	TE	ATREP3	RC/Helitron	CHH	Hypomethylated in nrpd1a-3 FTL
Chr1	28828200	28828600	AT1TE94305	TE	ATREP10D	RC/Helitron	CHH	Hypomethylated in nrpd1a-3 FTL
Chr1	29125700	29125900	AT1TE95255	TE	ATHPOGON1	DNA/Pogo	CHH	Hypomethylated in nrpd1a-3 FTL
Chr1	29320000	29320600	AT1G77990	Gene	protein_coding	-	CHH	Hypomethylated in nrpd1a-3 FTL
Chr1	29320000	29320600	AT1TE95915	TE	ATREP3	RC/Helitron	CHH	Hypomethylated in nrpd1a-3 FTL
Chr1	30254400	30254700	AT1TE98920	TE	ATREP3	RC/Helitron	CHH	Hypomethylated in nrpd1a-3 FTL
Chr2	257600	257800	257550-262038	Intergenic	-	-	CHH	Hypomethylated in nrpd1a-3 FTL
Chr2	394600	394800	AT2TE01630	TE	ATREP3	RC/Helitron	CHH	Hypomethylated in nrpd1a-3 FTL
Chr2	395400	395900	AT2TE01630	TE	ATREP3	RC/Helitron	CHH	Hypomethylated in nrpd1a-3 FTL
Chr2	500800	501600	AT2TE02160	TE	ATREP3	RC/Helitron	CHH	Hypomethylated in nrpd1a-3 FTL
Chr2	542900	543400	AT2TE02335	TE	ATREP3	RC/Helitron	CHH	Hypomethylated in nrpd1a-3 FTL
Chr2	543900	544100	AT2TE02335	TE	ATREP3	RC/Helitron	CHH	Hypomethylated in nrpd1a-3 FTL
Chr2	709500	710000	AT2TE03055	TE	ATREP3	RC/Helitron	CHH	Hypomethylated in nrpd1a-3 FTL
Chr2	795200	795600	AT2TE03505	TE	ATREP6	RC/Helitron	CHH	Hypomethylated in nrpd1a-3 FTL
Chr2	795515	795600	AT2G02800	Gene	protein_coding	-	CHH	Hypomethylated in nrpd1a-3 FTL
Chr2	878300	878351	877207-878351	Intergenic	-	-	CHH	Hypomethylated in nrpd1a-3 FTL
Chr2	878351	878374	AT2TE03910	TE	HELITRONY3	RC/Helitron	CHH	Hypomethylated in nrpd1a-3 FTL
Chr2	878374	878375	878374-878375	Intergenic	-	-	CHH	Hypomethylated in nrpd1a-3 FTL
Chr2	878375	878500	AT2TE03915	TE	HELITRONY3	RC/Helitron	CHH	Hypomethylated in nrpd1a-3 FTL
Chr2	910400	910600	AT2TE04085	TE	META1	LTR/Copia	CHH	Hypomethylated in nrpd1a-3 FTL
Chr2	912500	913300	AT2TE04085	TE	META1	LTR/Copia	CHH	Hypomethylated in nrpd1a-3 FTL
Chr2	1038200	1038800	AT2TE04630	TE	ATREP1	RC/Helitron	CHH	Hypomethylated in nrpd1a-3 FTL
Chr2	1241400	1242100	AT2TE05605	TE	HELITRONY3	RC/Helitron	CHH	Hypomethylated in nrpd1a-3 FTL
Chr2	1396000	1396300	AT2TE06405	TE	META1	LTR/Copia	CHH	Hypomethylated in nrpd1a-3 FTL
Chr2	1398000	1398400	AT2TE06405	TE	META1	LTR/Copia	CHH	Hypomethylated in nrpd1a-3 FTL
Chr2	1399200	1399500	AT2TE06405	TE	META1	LTR/Copia	CHH	Hypomethylated in nrpd1a-3 FTL
Chr2	1409800	1410000	AT2TE06450	TE	ATREP2	RC/Helitron	CHH	Hypomethylated in nrpd1a-3 FTL
Chr2	1617200	1617400	AT2TE07460	TE	META1	LTR/Copia	CHH	Hypomethylated in nrpd1a-3 FTL
Chr2	1734800	1735000	AT2TE08070	TE	ATREP11	RC/Helitron	CHH	Hypomethylated in nrpd1a-3 FTL
Chr2	1902900	1903100	AT2TE08765	TE	ATREP10D	RC/Helitron	CHH	Hypomethylated in nrpd1a-3 FTL
Chr2	1947900	1948300	AT2TE08970	TE	ATREP7	RC/Helitron	CHH	Hypomethylated in nrpd1a-3 FTL
Chr2	2065700	2065900	AT2TE09430	TE	HELITRONY3	RC/Helitron	CHH	Hypomethylated in nrpd1a-3 FTL
Chr2	2262200	2262400	AT2TE10425	TE	ATREP11A	RC/Helitron	CHH	Hypomethylated in nrpd1a-3 FTL
Chr2	2285400	2285700	AT2TE10525	TE	TNAT1A	DNA	CHH	Hypomethylated in nrpd1a-3 FTL
Chr2	2535500	2535700	AT2TE11480	TE	ARNOLDY2	DNA/MuDR	CHH	Hypomethylated in nrpd1a-3 FTL
Chr2	2696400	2696600	AT2TE11970	TE	HELITRONY3	RC/Helitron	CHH	Hypomethylated in nrpd1a-3 FTL
Chr2	2850000	2850400	AT2TE12475	TE	ATREP11	RC/Helitron	CHH	Hypomethylated in nrpd1a-3 FTL
Chr2	2962500	2962700	AT2TE12900	TE	ATREP3	RC/Helitron	CHH	Hypomethylated in nrpd1a-3 FTL
Chr2	3194800	3195100	AT2TE13800	TE	ATREP4	RC/Helitron	CHH	Hypomethylated in nrpd1a-3 FTL
Chr2	4025400	4025414	AT2TE17070	TE	ATREP3	RC/Helitron	CHH	Hypomethylated in nrpd1a-3 FTL
Chr2	4025414	4025415	4025414-4025415	Intergenic	-	-	CHH	Hypomethylated in nrpd1a-3 FTL
Chr2	4025415	4025700	AT2TE17075	TE	ATREP2	RC/Helitron	CHH	Hypomethylated in nrpd1a-3 FTL
Chr2	4472200	4472400	AT2TE18735	TE	ATREP13	RC/Helitron	CHH	Hypomethylated in nrpd1a-3 FTL
Chr2	5409200	5409500	AT2TE21895	TE	TNAT1A	DNA	CHH	Hypomethylated in nrpd1a-3 FTL
Chr2	5806800	5807000	AT2TE23655	TE	HELITRONY3	RC/Helitron	CHH	Hypomethylated in nrpd1a-3 FTL
Chr2	5807600	5807651	AT2TE23655	TE	HELITRONY3	RC/Helitron	CHH	Hypomethylated in nrpd1a-3 FTL
Chr2	5807651	5807652	5807651-5807652	Intergenic	-	-	CHH	Hypomethylated in nrpd1a-3 FTL
Chr2	5807652	5807813	AT2TE23660	TE	ATGP1	LTR/Gypsy	CHH	Hypomethylated in nrpd1a-3 FTL
Chr2	5807813	5807814	5807813-5807814	Intergenic	-	-	CHH	Hypomethylated in nrpd1a-3 FTL
Chr2	5807814	5807900	AT2TE23665	TE	ATGP1	LTR/Gypsy	CHH	Hypomethylated in nrpd1a-3 FTL
Chr2	5841500	5841700	AT2TE23815	TE	ATREP4	RC/Helitron	CHH	Hypomethylated in nrpd1a-3 FTL
Chr2	6206900	6207100	AT2TE25260	TE	HELITRONY1D	RC/Helitron	CHH	Hypomethylated in nrpd1a-3 FTL
Chr2	6288300	6288854	AT2TE25630	TE	ATREP13	RC/Helitron	CHH	Hypomethylated in nrpd1a-3 FTL
Chr2	6288854	6288855	6288854-6288855	Intergenic	-	-	CHH	Hypomethylated in nrpd1a-3 FTL
Chr2	6288855	6288900	AT2TE25635	TE	BRODYAGA2	DNA/MuDR	CHH	Hypomethylated in nrpd1a-3 FTL
Chr2	6383700	6384100	AT2TE26035	TE	ATREP3	RC/Helitron	CHH	Hypomethylated in nrpd1a-3 FTL
Chr2	6538700	6539100	AT2TE26735	TE	TNAT1A	DNA	CHH	Hypomethylated in nrpd1a-3 FTL
Chr2	6583600	6584100	AT2TE26865	TE	ARNOLDY2	DNA/MuDR	CHH	Hypomethylated in nrpd1a-3 FTL
Chr2	6659600	6659670	AT2TE27160	TE	ARNOLDY1	DNA/MuDR	CHH	Hypomethylated in nrpd1a-3 FTL
Chr2	6659670	6659671	6659670-6659671	Intergenic	-	-	CHH	Hypomethylated in nrpd1a-3 FTL
Chr2	6659671	6660200	AT2TE27165	TE	ARNOLDY2	DNA/MuDR	CHH	Hypomethylated in nrpd1a-3 FTL
Chr2	6662000	6662200	AT2TE27165	TE	ARNOLDY2	DNA/MuDR	CHH	Hypomethylated in nrpd1a-3 FTL
Chr2	6663900	6664100	AT2TE27170	TE	ATREP3	RC/Helitron	CHH	Hypomethylated in nrpd1a-3 FTL
Chr2	6679000	6679400	AT2TE27270	TE	ATREP5	RC/Helitron	CHH	Hypomethylated in nrpd1a-3 FTL
Chr2	6729100	6729600	AT2TE27490	TE	ARNOLDY1	DNA/MuDR	CHH	Hypomethylated in nrpd1a-3 FTL
Chr2	6729900	6730300	AT2TE27490	TE	ARNOLDY1	DNA/MuDR	CHH	Hypomethylated in nrpd1a-3 FTL
Chr2	6803400	6803800	AT2TE27750	TE	ATREP3	RC/Helitron	CHH	Hypomethylated in nrpd1a-3 FTL
Chr2	6804100	6804300	AT2TE27750	TE	ATREP3	RC/Helitron	CHH	Hypomethylated in nrpd1a-3 FTL
Chr2	6923500	6924400	AT2TE28205	TE	ATREP3	RC/Helitron	CHH	Hypomethylated in nrpd1a-3 FTL
Chr2	6924800	6925100	AT2TE28205	TE	ATREP3	RC/Helitron	CHH	Hypomethylated in nrpd1a-3 FTL
Chr2	7111900	7112200	AT2TE28950	TE	ATREP3	RC/Helitron	CHH	Hypomethylated in nrpd1a-3 FTL
Chr2	7112600	7112900	AT2TE28950	TE	ATREP3	RC/Helitron	CHH	Hypomethylated in nrpd1a-3 FTL
Chr2	7154300	7154600	AT2TE29105	TE	ATREP3	RC/Helitron	CHH	Hypomethylated in nrpd1a-3 FTL
Chr2	7169200	7169500	AT2TE29180	TE	ATREP3	RC/Helitron	CHH	Hypomethylated in nrpd1a-3 FTL
Chr2	7289800	7290000	AT2TE29725	TE	VANDAL2N1	DNA/MuDR	CHH	Hypomethylated in nrpd1a-3 FTL
Chr2	7536800	7537100	AT2TE30980	TE	ATREP10D	RC/Helitron	CHH	Hypomethylated in nrpd1a-3 FTL
Chr2	7540000	7540200	AT2TE31000	TE	ATHPOGON2	DNA/Pogo	CHH	Hypomethylated in nrpd1a-3 FTL
Chr2	7813500	7814000	AT2TE32315	TE	ATREP3	RC/Helitron	CHH	Hypomethylated in nrpd1a-3 FTL
Chr2	7961200	7961400	AT2TE33015	TE	ATREP3	RC/Helitron	CHH	Hypomethylated in nrpd1a-3 FTL
Chr2	8077900	8078200	AT2TE33540	TE	ATREP13	RC/Helitron	CHH	Hypomethylated in nrpd1a-3 FTL
Chr2	8102800	8103000	8102782-8109043	Intergenic	-	-	CHH	Hypomethylated in nrpd1a-3 FTL
Chr2	8302400	8302941	AT2TE34525	TE	ATREP13	RC/Helitron	CHH	Hypomethylated in nrpd1a-3 FTL
Chr2	8302941	8303000	8302941-8304029	Intergenic	-	-	CHH	Hypomethylated in nrpd1a-3 FTL
Chr2	8822700	8822900	8820891-8823733	Intergenic	-	-	CHH	Hypomethylated in nrpd1a-3 FTL
Chr2	8907400	8907407	AT2TE37490	TE	RP1_AT	DNA	CHH	Hypomethylated in nrpd1a-3 FTL
Chr2	8907407	8907408	8907407-8907408	Intergenic	-	-	CHH	Hypomethylated in nrpd1a-3 FTL
Chr2	8907408	8908000	AT2TE37495	TE	ATREP2A	RC/Helitron	CHH	Hypomethylated in nrpd1a-3 FTL
Chr2	9029800	9030100	AT2TE38110	TE	ATREP1	RC/Helitron	CHH	Hypomethylated in nrpd1a-3 FTL
Chr2	9225600	9225900	AT2TE39070	TE	ATREP2	RC/Helitron	CHH	Hypomethylated in nrpd1a-3 FTL
Chr2	9228900	9229100	AT2G21550	Gene	protein_coding	-	CHH	Hypomethylated in nrpd1a-3 FTL
Chr2	9228900	9229100	AT2TE39090	TE	ATREP2	RC/Helitron	CHH	Hypomethylated in nrpd1a-3 FTL
Chr2	9595300	9595600	9594765-9595648	Intergenic	-	-	CHH	Hypomethylated in nrpd1a-3 FTL
Chr2	9860000	9860400	AT2TE42170	TE	ATREP2	RC/Helitron	CHH	Hypomethylated in nrpd1a-3 FTL
Chr2	10019000	10019200	AT2TE42855	TE	ATREP5	RC/Helitron	CHH	Hypomethylated in nrpd1a-3 FTL
Chr2	10070700	10070900	AT2TE43100	TE	ATREP1	RC/Helitron	CHH	Hypomethylated in nrpd1a-3 FTL
Chr2	10351600	10351800	AT2TE44355	TE	ATREP10	RC/Helitron	CHH	Hypomethylated in nrpd1a-3 FTL
Chr2	10468300	10468500	AT2TE44915	TE	ATREP3	RC/Helitron	CHH	Hypomethylated in nrpd1a-3 FTL
Chr2	10468340	10468500	AT2G24625	Gene	protein_coding	-	CHH	Hypomethylated in nrpd1a-3 FTL
Chr2	11308600	11308800	AT2TE48900	TE	ATHPOGON1	DNA/Pogo	CHH	Hypomethylated in nrpd1a-3 FTL
Chr2	11398700	11399000	AT2TE49335	TE	ATREP10D	RC/Helitron	CHH	Hypomethylated in nrpd1a-3 FTL
Chr2	11398700	11399000	AT2TE49350	TE	ATREP3	RC/Helitron	CHH	Hypomethylated in nrpd1a-3 FTL
Chr2	12092500	12092900	AT2TE52670	TE	ATREP3	RC/Helitron	CHH	Hypomethylated in nrpd1a-3 FTL
Chr2	12555700	12556200	AT2TE54845	TE	ATREP3	RC/Helitron	CHH	Hypomethylated in nrpd1a-3 FTL
Chr2	12801200	12801400	AT2TE55980	TE	ATREP3	RC/Helitron	CHH	Hypomethylated in nrpd1a-3 FTL
Chr2	12802800	12803100	AT2TE55980	TE	ATREP3	RC/Helitron	CHH	Hypomethylated in nrpd1a-3 FTL
Chr2	13101900	13102100	AT2TE57420	TE	ATREP2	RC/Helitron	CHH	Hypomethylated in nrpd1a-3 FTL
Chr2	13113300	13113500	AT2TE57485	TE	ATREP1	RC/Helitron	CHH	Hypomethylated in nrpd1a-3 FTL
Chr2	13268500	13268800	AT2TE58200	TE	ATREP3	RC/Helitron	CHH	Hypomethylated in nrpd1a-3 FTL
Chr2	13335900	13336400	AT2TE58530	TE	ATREP3	RC/Helitron	CHH	Hypomethylated in nrpd1a-3 FTL
Chr2	13336800	13337000	AT2TE58530	TE	ATREP3	RC/Helitron	CHH	Hypomethylated in nrpd1a-3 FTL
Chr2	13337800	13338000	AT2TE58530	TE	ATREP3	RC/Helitron	CHH	Hypomethylated in nrpd1a-3 FTL
Chr2	13634600	13634800	AT2TE59995	TE	HELITRONY3	RC/Helitron	CHH	Hypomethylated in nrpd1a-3 FTL
Chr2	13661300	13661310	AT2TE60105	TE	HELITRONY1D	RC/Helitron	CHH	Hypomethylated in nrpd1a-3 FTL
Chr2	13661310	13661311	13661310-13661311	Intergenic	-	-	CHH	Hypomethylated in nrpd1a-3 FTL
Chr2	13661311	13661334	AT2TE60110	TE	ATHPOGON1	DNA/Pogo	CHH	Hypomethylated in nrpd1a-3 FTL
Chr2	13661334	13661335	13661334-13661335	Intergenic	-	-	CHH	Hypomethylated in nrpd1a-3 FTL
Chr2	13661335	13661500	AT2TE60115	TE	ATHPOGON3	DNA/Pogo	CHH	Hypomethylated in nrpd1a-3 FTL
Chr2	13886000	13886300	AT2TE61215	TE	ATREP2	RC/Helitron	CHH	Hypomethylated in nrpd1a-3 FTL
Chr2	13906700	13906900	AT2TE61325	TE	ATREP3	RC/Helitron	CHH	Hypomethylated in nrpd1a-3 FTL
Chr2	13907500	13908400	AT2TE61325	TE	ATREP3	RC/Helitron	CHH	Hypomethylated in nrpd1a-3 FTL
Chr2	14334100	14335000	AT2TE63435	TE	ATREP3	RC/Helitron	CHH	Hypomethylated in nrpd1a-3 FTL
Chr2	14571900	14572600	AT2TE64580	TE	ATREP1	RC/Helitron	CHH	Hypomethylated in nrpd1a-3 FTL
Chr2	16380400	16380700	AT2TE73500	TE	ATREP10D	RC/Helitron	CHH	Hypomethylated in nrpd1a-3 FTL
Chr2	16876100	16876600	AT2TE75960	TE	HELITRONY3	RC/Helitron	CHH	Hypomethylated in nrpd1a-3 FTL
Chr2	17147100	17147600	AT2TE77260	TE	ATREP1	RC/Helitron	CHH	Hypomethylated in nrpd1a-3 FTL
Chr2	17147130	17147600	AT2TE77265	TE	ATREP2	RC/Helitron	CHH	Hypomethylated in nrpd1a-3 FTL
Chr2	17253400	17254200	AT2TE77780	TE	ATREP3	RC/Helitron	CHH	Hypomethylated in nrpd1a-3 FTL
Chr2	17904600	17905000	AT2TE81015	TE	ATREP11	RC/Helitron	CHH	Hypomethylated in nrpd1a-3 FTL
Chr2	17992600	17992900	AT2TE81445	TE	ATREP2A	RC/Helitron	CHH	Hypomethylated in nrpd1a-3 FTL
Chr2	19172300	19172665	AT2TE87285	TE	ATREP2	RC/Helitron	CHH	Hypomethylated in nrpd1a-3 FTL
Chr2	19172665	19172666	19172665-19172666	Intergenic	-	-	CHH	Hypomethylated in nrpd1a-3 FTL
Chr2	19172666	19172700	AT2TE87290	TE	HELITRONY1E	RC/Helitron	CHH	Hypomethylated in nrpd1a-3 FTL
Chr2	19196400	19196800	AT2TE87415	TE	ATREP3	RC/Helitron	CHH	Hypomethylated in nrpd1a-3 FTL
Chr2	19323300	19323600	AT2TE88035	TE	ATREP10D	RC/Helitron	CHH	Hypomethylated in nrpd1a-3 FTL
Chr2	19623200	19623600	AT2TE89515	TE	ATREP2	RC/Helitron	CHH	Hypomethylated in nrpd1a-3 FTL
Chr3	422900	423100	AT3TE01800	TE	ATREP1	RC/Helitron	CHH	Hypomethylated in nrpd1a-3 FTL
Chr3	422900	423100	AT3TE01805	TE	ATREP2	RC/Helitron	CHH	Hypomethylated in nrpd1a-3 FTL
Chr3	1283400	1283600	AT3TE05385	TE	ATREP6	RC/Helitron	CHH	Hypomethylated in nrpd1a-3 FTL
Chr3	1571700	1571900	AT3TE06595	TE	ATREP3	RC/Helitron	CHH	Hypomethylated in nrpd1a-3 FTL
Chr3	2260600	2260800	AT3TE09505	TE	ATDNAI27T9A	DNA/MuDR	CHH	Hypomethylated in nrpd1a-3 FTL
Chr3	2628600	2628800	AT3TE11070	TE	ATHATN7	DNA/HAT	CHH	Hypomethylated in nrpd1a-3 FTL
Chr3	2629500	2629700	AT3TE11080	TE	ATREP3	RC/Helitron	CHH	Hypomethylated in nrpd1a-3 FTL
Chr3	3080300	3080600	AT3TE12935	TE	ATREP2	RC/Helitron	CHH	Hypomethylated in nrpd1a-3 FTL
Chr3	3716500	3717000	AT3TE15635	TE	ATREP3	RC/Helitron	CHH	Hypomethylated in nrpd1a-3 FTL
Chr3	3874200	3874500	AT3TE16310	TE	ATREP10D	RC/Helitron	CHH	Hypomethylated in nrpd1a-3 FTL
Chr3	3874499	3874500	AT3G12145	Gene	protein_coding	-	CHH	Hypomethylated in nrpd1a-3 FTL
Chr3	4467700	4468400	AT3G13662	Gene	protein_coding	-	CHH	Hypomethylated in nrpd1a-3 FTL
Chr3	4467700	4468400	AT3TE18825	TE	ATREP1	RC/Helitron	CHH	Hypomethylated in nrpd1a-3 FTL
Chr3	4579300	4579500	AT3TE19315	TE	ATREP2	RC/Helitron	CHH	Hypomethylated in nrpd1a-3 FTL
Chr3	4584900	4585200	AT3TE19335	TE	ATREP2	RC/Helitron	CHH	Hypomethylated in nrpd1a-3 FTL
Chr3	4929800	4930000	AT3TE20780	TE	VANDAL21	DNA/MuDR	CHH	Hypomethylated in nrpd1a-3 FTL
Chr3	4977300	4977500	AT3TE20965	TE	ATREP1	RC/Helitron	CHH	Hypomethylated in nrpd1a-3 FTL
Chr3	5622200	5622885	AT3TE23620	TE	ATREP3	RC/Helitron	CHH	Hypomethylated in nrpd1a-3 FTL
Chr3	5622885	5622888	5622885-5622888	Intergenic	-	-	CHH	Hypomethylated in nrpd1a-3 FTL
Chr3	5622888	5622900	AT3TE23625	TE	HELITRONY1D	RC/Helitron	CHH	Hypomethylated in nrpd1a-3 FTL
Chr3	5743900	5745500	AT3TE24145	TE	ATREP3	RC/Helitron	CHH	Hypomethylated in nrpd1a-3 FTL
Chr3	5792500	5792700	AT3TE24355	TE	ATREP10	RC/Helitron	CHH	Hypomethylated in nrpd1a-3 FTL
Chr3	6992200	6992400	AT3TE29360	TE	ATREP10C	RC/Helitron	CHH	Hypomethylated in nrpd1a-3 FTL
Chr3	7766200	7766400	AT3TE32605	TE	ATREP2	RC/Helitron	CHH	Hypomethylated in nrpd1a-3 FTL
Chr3	7851700	7851837	AT3TE32945	TE	VANDAL22	DNA/MuDR	CHH	Hypomethylated in nrpd1a-3 FTL
Chr3	7851837	7851900	7851837-7854419	Intergenic	-	-	CHH	Hypomethylated in nrpd1a-3 FTL
Chr3	7922000	7922300	AT3TE33205	TE	ATREP10B	RC/Helitron	CHH	Hypomethylated in nrpd1a-3 FTL
Chr3	7937200	7937400	AT3TE33265	TE	ATREP2A	RC/Helitron	CHH	Hypomethylated in nrpd1a-3 FTL
Chr3	7994900	7995300	AT3TE33545	TE	ATREP3	RC/Helitron	CHH	Hypomethylated in nrpd1a-3 FTL
Chr3	7995700	7996400	AT3TE33545	TE	ATREP3	RC/Helitron	CHH	Hypomethylated in nrpd1a-3 FTL
Chr3	8093500	8093900	AT3TE33960	TE	ATDNAI26T9	DNA/MuDR	CHH	Hypomethylated in nrpd1a-3 FTL
Chr3	8426100	8426300	AT3TE35320	TE	ATMUN1	DNA/MuDR	CHH	Hypomethylated in nrpd1a-3 FTL
Chr3	8492000	8492500	AT3TE35610	TE	META1	LTR/Copia	CHH	Hypomethylated in nrpd1a-3 FTL
Chr3	8875300	8875600	8875097-8876027	Intergenic	-	-	CHH	Hypomethylated in nrpd1a-3 FTL
Chr3	8883600	8883800	AT3TE37155	TE	HELITRONY3A	RC/Helitron	CHH	Hypomethylated in nrpd1a-3 FTL
Chr3	9383800	9384300	AT3TE39205	TE	ATREP3	RC/Helitron	CHH	Hypomethylated in nrpd1a-3 FTL
Chr3	9384800	9385400	AT3TE39205	TE	ATREP3	RC/Helitron	CHH	Hypomethylated in nrpd1a-3 FTL
Chr3	9665300	9665500	AT3TE40295	TE	ATREP6	RC/Helitron	CHH	Hypomethylated in nrpd1a-3 FTL
Chr3	9766400	9766700	AT3TE40655	TE	ATREP3	RC/Helitron	CHH	Hypomethylated in nrpd1a-3 FTL
Chr3	9767000	9767500	AT3TE40655	TE	ATREP3	RC/Helitron	CHH	Hypomethylated in nrpd1a-3 FTL
Chr3	10294200	10294600	AT3TE42795	TE	ARNOLDY1	DNA/MuDR	CHH	Hypomethylated in nrpd1a-3 FTL
Chr3	10314000	10314200	AT3TE42850	TE	ATREP5	RC/Helitron	CHH	Hypomethylated in nrpd1a-3 FTL
Chr3	10556200	10557100	AT3TE43880	TE	ATREP3	RC/Helitron	CHH	Hypomethylated in nrpd1a-3 FTL
Chr3	10575100	10575400	AT3TE43990	TE	ATREP3	RC/Helitron	CHH	Hypomethylated in nrpd1a-3 FTL
Chr3	10758300	10758500	AT3TE44720	TE	ATREP2A	RC/Helitron	CHH	Hypomethylated in nrpd1a-3 FTL
Chr3	10758300	10758500	AT3TE44730	TE	ATREP2	RC/Helitron	CHH	Hypomethylated in nrpd1a-3 FTL
Chr3	10819400	10819900	AT3TE44975	TE	ATREP3	RC/Helitron	CHH	Hypomethylated in nrpd1a-3 FTL
Chr3	10820300	10821200	AT3TE44975	TE	ATREP3	RC/Helitron	CHH	Hypomethylated in nrpd1a-3 FTL
Chr3	11090600	11090800	AT3TE46130	TE	ATREP2	RC/Helitron	CHH	Hypomethylated in nrpd1a-3 FTL
Chr3	11132300	11132600	AT3TE46270	TE	ATREP2	RC/Helitron	CHH	Hypomethylated in nrpd1a-3 FTL
Chr3	11166800	11167300	AT3TE46430	TE	ATREP13	RC/Helitron	CHH	Hypomethylated in nrpd1a-3 FTL
Chr3	11200800	11201100	AT3TE46655	TE	ATREP4	RC/Helitron	CHH	Hypomethylated in nrpd1a-3 FTL
Chr3	11205400	11205600	AT3TE46670	TE	ATGP1	LTR/Gypsy	CHH	Hypomethylated in nrpd1a-3 FTL
Chr3	11286700	11286900	AT3TE47035	TE	ATREP11	RC/Helitron	CHH	Hypomethylated in nrpd1a-3 FTL
Chr3	11348100	11348300	AT3TE47260	TE	ATREP4	RC/Helitron	CHH	Hypomethylated in nrpd1a-3 FTL
Chr3	11374300	11374500	AT3TE47385	TE	ARNOLDY1	DNA/MuDR	CHH	Hypomethylated in nrpd1a-3 FTL
Chr3	11380400	11380428	11380377-11380428	Intergenic	-	-	CHH	Hypomethylated in nrpd1a-3 FTL
Chr3	11380428	11380459	AT3TE47455	TE	HELITRON2	RC/Helitron	CHH	Hypomethylated in nrpd1a-3 FTL
Chr3	11380459	11380460	11380459-11380460	Intergenic	-	-	CHH	Hypomethylated in nrpd1a-3 FTL
Chr3	11380460	11380700	AT3TE47460	TE	ATREP3	RC/Helitron	CHH	Hypomethylated in nrpd1a-3 FTL
Chr3	11426100	11426400	AT3TE47615	TE	TNAT1A	DNA	CHH	Hypomethylated in nrpd1a-3 FTL
Chr3	11502700	11503500	AT3TE47925	TE	ATREP3	RC/Helitron	CHH	Hypomethylated in nrpd1a-3 FTL
Chr3	11536100	11536300	AT3TE48060	TE	ATREP3	RC/Helitron	CHH	Hypomethylated in nrpd1a-3 FTL
Chr3	11968000	11968500	AT3TE49835	TE	ATREP3	RC/Helitron	CHH	Hypomethylated in nrpd1a-3 FTL
Chr3	12092400	12092700	AT3TE50300	TE	ARNOLD2	DNA/MuDR	CHH	Hypomethylated in nrpd1a-3 FTL
Chr3	12136100	12136400	AT3TE50455	TE	HELITRONY3	RC/Helitron	CHH	Hypomethylated in nrpd1a-3 FTL
Chr3	12276300	12276354	AT3TE50850	TE	ATREP18	DNA	CHH	Hypomethylated in nrpd1a-3 FTL
Chr3	12276354	12276355	12276354-12276355	Intergenic	-	-	CHH	Hypomethylated in nrpd1a-3 FTL
Chr3	12276355	12276491	AT3TE50855	TE	ATREP18	DNA	CHH	Hypomethylated in nrpd1a-3 FTL
Chr3	12276491	12276492	12276491-12276492	Intergenic	-	-	CHH	Hypomethylated in nrpd1a-3 FTL
Chr3	12276492	12276500	AT3TE50860	TE	ATREP18	DNA	CHH	Hypomethylated in nrpd1a-3 FTL
Chr3	12359200	12359400	AT3TE51195	TE	HELITRON3	RC/Helitron	CHH	Hypomethylated in nrpd1a-3 FTL
Chr3	12359200	12359400	AT3TE51200	TE	ATREP6	RC/Helitron	CHH	Hypomethylated in nrpd1a-3 FTL
Chr3	12485200	12485400	AT3TE51505	TE	ATGP1	LTR/Gypsy	CHH	Hypomethylated in nrpd1a-3 FTL
Chr3	12854400	12854700	AT3TE52800	TE	ATLINE1_6	LINE/L1	CHH	Hypomethylated in nrpd1a-3 FTL
Chr3	12854400	12854700	AT3TE52805	TE	ATGP1	LTR/Gypsy	CHH	Hypomethylated in nrpd1a-3 FTL
Chr3	13128700	13128900	AT3TE53720	TE	ARNOLDY2	DNA/MuDR	CHH	Hypomethylated in nrpd1a-3 FTL
Chr3	13328300	13328500	AT3TE54480	TE	ATREP3	RC/Helitron	CHH	Hypomethylated in nrpd1a-3 FTL
Chr3	14057300	14057700	AT3TE57645	TE	VANDAL8	DNA/MuDR	CHH	Hypomethylated in nrpd1a-3 FTL
Chr3	14562400	14562600	14560707-14563399	Intergenic	-	-	CHH	Hypomethylated in nrpd1a-3 FTL
Chr3	14957000	14957200	AT3TE61000	TE	META1	LTR/Copia	CHH	Hypomethylated in nrpd1a-3 FTL
Chr3	15005500	15005800	15005459-15006613	Intergenic	-	-	CHH	Hypomethylated in nrpd1a-3 FTL
Chr3	15078400	15078800	15077221-15081073	Intergenic	-	-	CHH	Hypomethylated in nrpd1a-3 FTL
Chr3	15168800	15169000	AT3TE61665	TE	TNAT1A	DNA	CHH	Hypomethylated in nrpd1a-3 FTL
Chr3	15451600	15452800	AT3TE62670	TE	ATREP3	RC/Helitron	CHH	Hypomethylated in nrpd1a-3 FTL
Chr3	15485200	15485700	AT3TE62750	TE	ATREP3	RC/Helitron	CHH	Hypomethylated in nrpd1a-3 FTL
Chr3	15783200	15783500	AT3G43990	Gene	protein_coding	-	CHH	Hypomethylated in nrpd1a-3 FTL
Chr3	15937500	15937900	AT3TE64485	TE	ATREP3	RC/Helitron	CHH	Hypomethylated in nrpd1a-3 FTL
Chr3	16040000	16040400	AT3TE64915	TE	META1	LTR/Copia	CHH	Hypomethylated in nrpd1a-3 FTL
Chr3	16065600	16065900	AT3TE65015	TE	META1	LTR/Copia	CHH	Hypomethylated in nrpd1a-3 FTL
Chr3	16182300	16182500	AT3TE65540	TE	HELITRONY1D	RC/Helitron	CHH	Hypomethylated in nrpd1a-3 FTL
Chr3	16235500	16235589	AT3TE65765	TE	ATHPOGO	DNA/Pogo	CHH	Hypomethylated in nrpd1a-3 FTL
Chr3	16235589	16235590	16235589-16235590	Intergenic	-	-	CHH	Hypomethylated in nrpd1a-3 FTL
Chr3	16235590	16235700	AT3TE65770	TE	ATREP10D	RC/Helitron	CHH	Hypomethylated in nrpd1a-3 FTL
Chr3	16266700	16267200	AT3TE65875	TE	ATREP10D	RC/Helitron	CHH	Hypomethylated in nrpd1a-3 FTL
Chr3	16266700	16267200	AT3TE65915	TE	ATREP13	RC/Helitron	CHH	Hypomethylated in nrpd1a-3 FTL
Chr3	16276000	16276200	AT3TE65950	TE	ATREP11	RC/Helitron	CHH	Hypomethylated in nrpd1a-3 FTL
Chr3	16281700	16281900	AT3TE65990	TE	ATREP1	RC/Helitron	CHH	Hypomethylated in nrpd1a-3 FTL
Chr3	16405300	16405700	AT3TE66450	TE	ATREP2	RC/Helitron	CHH	Hypomethylated in nrpd1a-3 FTL
Chr3	16420100	16420300	AT3TE66530	TE	ATREP3	RC/Helitron	CHH	Hypomethylated in nrpd1a-3 FTL
Chr3	16451200	16451400	AT3TE66705	TE	ATREP3	RC/Helitron	CHH	Hypomethylated in nrpd1a-3 FTL
Chr3	16451700	16451900	AT3TE66705	TE	ATREP3	RC/Helitron	CHH	Hypomethylated in nrpd1a-3 FTL
Chr3	16485500	16485800	AT3TE66840	TE	ATREP2	RC/Helitron	CHH	Hypomethylated in nrpd1a-3 FTL
Chr3	16511200	16511500	AT3TE66935	TE	VANDAL2N1	DNA/MuDR	CHH	Hypomethylated in nrpd1a-3 FTL
Chr3	16562000	16562500	AT3TE67160	TE	ATREP3	RC/Helitron	CHH	Hypomethylated in nrpd1a-3 FTL
Chr3	16700000	16700160	AT3TE67660	TE	VANDAL20	DNA/MuDR	CHH	Hypomethylated in nrpd1a-3 FTL
Chr3	16700160	16700300	16700160-16700465	Intergenic	-	-	CHH	Hypomethylated in nrpd1a-3 FTL
Chr3	16723200	16723400	AT3TE67780	TE	ATREP2	RC/Helitron	CHH	Hypomethylated in nrpd1a-3 FTL
Chr3	16879700	16880100	AT3TE68385	TE	ATREP3	RC/Helitron	CHH	Hypomethylated in nrpd1a-3 FTL
Chr3	16938000	16938200	AT3G46120	Gene	protein_coding	-	CHH	Hypomethylated in nrpd1a-3 FTL
Chr3	16938000	16938200	AT3TE68660	TE	ATREP3	RC/Helitron	CHH	Hypomethylated in nrpd1a-3 FTL
Chr3	17061500	17062000	AT3TE69155	TE	ATREP3	RC/Helitron	CHH	Hypomethylated in nrpd1a-3 FTL
Chr3	17062600	17063200	AT3TE69155	TE	ATREP3	RC/Helitron	CHH	Hypomethylated in nrpd1a-3 FTL
Chr3	17142500	17142700	AT3TE69470	TE	ATREP3	RC/Helitron	CHH	Hypomethylated in nrpd1a-3 FTL
Chr3	17143500	17144000	AT3TE69475	TE	ATREP3	RC/Helitron	CHH	Hypomethylated in nrpd1a-3 FTL
Chr3	17150300	17150700	AT3TE69475	TE	ATREP3	RC/Helitron	CHH	Hypomethylated in nrpd1a-3 FTL
Chr3	17150300	17150700	AT3TE69495	TE	ATREP13	RC/Helitron	CHH	Hypomethylated in nrpd1a-3 FTL
Chr3	17275800	17276300	AT3TE70035	TE	ATREP3	RC/Helitron	CHH	Hypomethylated in nrpd1a-3 FTL
Chr3	17277100	17277800	AT3TE70035	TE	ATREP3	RC/Helitron	CHH	Hypomethylated in nrpd1a-3 FTL
Chr3	17300500	17301000	AT3TE70130	TE	ATREP3	RC/Helitron	CHH	Hypomethylated in nrpd1a-3 FTL
Chr3	17367200	17367700	AT3TE70410	TE	META1	LTR/Copia	CHH	Hypomethylated in nrpd1a-3 FTL
Chr3	17469700	17469766	17469460-17469766	Intergenic	-	-	CHH	Hypomethylated in nrpd1a-3 FTL
Chr3	17469766	17469787	AT3TE70780	TE	ATREP12	RC/Helitron	CHH	Hypomethylated in nrpd1a-3 FTL
Chr3	17469787	17469788	17469787-17469788	Intergenic	-	-	CHH	Hypomethylated in nrpd1a-3 FTL
Chr3	17469788	17470000	AT3TE70785	TE	ATREP12	RC/Helitron	CHH	Hypomethylated in nrpd1a-3 FTL
Chr3	17730800	17731200	AT3TE71820	TE	ATREP3	RC/Helitron	CHH	Hypomethylated in nrpd1a-3 FTL
Chr3	17777500	17778000	AT3TE72005	TE	ATREP3	RC/Helitron	CHH	Hypomethylated in nrpd1a-3 FTL
Chr3	18412200	18412400	AT3TE74700	TE	ATREP3	RC/Helitron	CHH	Hypomethylated in nrpd1a-3 FTL
Chr3	18412900	18413200	AT3TE74700	TE	ATREP3	RC/Helitron	CHH	Hypomethylated in nrpd1a-3 FTL
Chr3	18495300	18495500	AT3TE75045	TE	ATREP1	RC/Helitron	CHH	Hypomethylated in nrpd1a-3 FTL
Chr3	18734800	18735400	AT3TE76010	TE	META1	LTR/Copia	CHH	Hypomethylated in nrpd1a-3 FTL
Chr3	18746900	18747100	AT3TE76040	TE	ATREP3	RC/Helitron	CHH	Hypomethylated in nrpd1a-3 FTL
Chr3	19178400	19178414	AT3TE77795	TE	AT9NMU1	DNA/MuDR	CHH	Hypomethylated in nrpd1a-3 FTL
Chr3	19178414	19178415	19178414-19178415	Intergenic	-	-	CHH	Hypomethylated in nrpd1a-3 FTL
Chr3	19178415	19178600	AT3TE77800	TE	AT9MU1	DNA/MuDR	CHH	Hypomethylated in nrpd1a-3 FTL
Chr3	19529600	19529800	AT3G52680	Gene	protein_coding	-	CHH	Hypomethylated in nrpd1a-3 FTL
Chr3	19529600	19529800	AT3TE79270	TE	ATREP1	RC/Helitron	CHH	Hypomethylated in nrpd1a-3 FTL
Chr3	20486800	20487000	AT3TE83280	TE	ATREP3	RC/Helitron	CHH	Hypomethylated in nrpd1a-3 FTL
Chr3	20655000	20655300	AT3TE84000	TE	ARNOLDY2	DNA/MuDR	CHH	Hypomethylated in nrpd1a-3 FTL
Chr3	20769700	20770200	AT3TE84475	TE	ATREP1	RC/Helitron	CHH	Hypomethylated in nrpd1a-3 FTL
Chr3	20788100	20788400	AT3TE84550	TE	ATREP3	RC/Helitron	CHH	Hypomethylated in nrpd1a-3 FTL
Chr3	22119500	22119900	AT3TE90045	TE	ATREP3	RC/Helitron	CHH	Hypomethylated in nrpd1a-3 FTL
Chr3	22215500	22215900	AT3TE90460	TE	ATREP13	RC/Helitron	CHH	Hypomethylated in nrpd1a-3 FTL
Chr4	78900	79006	AT4TE00375	TE	VANDAL22	DNA/MuDR	CHH	Hypomethylated in nrpd1a-3 FTL
Chr4	79006	79007	79006-79007	Intergenic	-	-	CHH	Hypomethylated in nrpd1a-3 FTL
Chr4	79007	79200	AT4TE00380	TE	ATREP10B	RC/Helitron	CHH	Hypomethylated in nrpd1a-3 FTL
Chr4	417600	417800	AT4TE02165	TE	ATREP10D	RC/Helitron	CHH	Hypomethylated in nrpd1a-3 FTL
Chr4	929500	929726	AT4TE04725	TE	ATLINE1A	LINE/L1	CHH	Hypomethylated in nrpd1a-3 FTL
Chr4	929726	929800	929726-930065	Intergenic	-	-	CHH	Hypomethylated in nrpd1a-3 FTL
Chr4	1000000	1000500	AT4TE05105	TE	ATREP3	RC/Helitron	CHH	Hypomethylated in nrpd1a-3 FTL
Chr4	1199400	1199600	AT4TE06130	TE	ATREP1	RC/Helitron	CHH	Hypomethylated in nrpd1a-3 FTL
Chr4	1281600	1282400	AT4TE06555	TE	ATREP5	RC/Helitron	CHH	Hypomethylated in nrpd1a-3 FTL
Chr4	1521400	1521600	AT4TE07740	TE	ATREP2	RC/Helitron	CHH	Hypomethylated in nrpd1a-3 FTL
Chr4	1749400	1749600	1749365-1749725	Intergenic	-	-	CHH	Hypomethylated in nrpd1a-3 FTL
Chr4	2423400	2423700	AT4TE11295	TE	HELITRONY1D	RC/Helitron	CHH	Hypomethylated in nrpd1a-3 FTL
Chr4	2423400	2423700	AT4TE11300	TE	TNAT1A	DNA	CHH	Hypomethylated in nrpd1a-3 FTL
Chr4	2621300	2621600	AT4TE12275	TE	ATREP3	RC/Helitron	CHH	Hypomethylated in nrpd1a-3 FTL
Chr4	2867800	2868000	AT4TE13450	TE	ATGP1	LTR/Gypsy	CHH	Hypomethylated in nrpd1a-3 FTL
Chr4	3559800	3560000	AT4TE15955	TE	VANDAL3	DNA/MuDR	CHH	Hypomethylated in nrpd1a-3 FTL
Chr4	3893700	3894000	AT4TE17005	TE	ATREP3	RC/Helitron	CHH	Hypomethylated in nrpd1a-3 FTL
Chr4	3897100	3897500	AT4TE17035	TE	ATREP2A	RC/Helitron	CHH	Hypomethylated in nrpd1a-3 FTL
Chr4	4096000	4096200	AT4TE17760	TE	ARNOLDY1	DNA/MuDR	CHH	Hypomethylated in nrpd1a-3 FTL
Chr4	4146400	4147000	AT4TE17970	TE	HELITRON4	RC/Helitron	CHH	Hypomethylated in nrpd1a-3 FTL
Chr4	4147900	4148100	AT4TE17970	TE	HELITRON4	RC/Helitron	CHH	Hypomethylated in nrpd1a-3 FTL
Chr4	4146400	4147000	AT4TE17975	TE	ATREP3	RC/Helitron	CHH	Hypomethylated in nrpd1a-3 FTL
Chr4	4147900	4148100	AT4TE17975	TE	ATREP3	RC/Helitron	CHH	Hypomethylated in nrpd1a-3 FTL
Chr4	5177400	5177800	AT4TE21520	TE	ARNOLDY1	DNA/MuDR	CHH	Hypomethylated in nrpd1a-3 FTL
Chr4	5301000	5301200	AT4TE22070	TE	ATSINE4	SINE	CHH	Hypomethylated in nrpd1a-3 FTL
Chr4	5382600	5382900	AT4TE22480	TE	ARNOLDY2	DNA/MuDR	CHH	Hypomethylated in nrpd1a-3 FTL
Chr4	5393900	5394100	AT4TE22535	TE	HELITRONY3	RC/Helitron	CHH	Hypomethylated in nrpd1a-3 FTL
Chr4	5397700	5397900	AT4TE22560	TE	ATHILA4A	LTR/Gypsy	CHH	Hypomethylated in nrpd1a-3 FTL
Chr4	5430800	5431000	AT4TE22725	TE	ATREP11	RC/Helitron	CHH	Hypomethylated in nrpd1a-3 FTL
Chr4	5442000	5442200	AT4TE22785	TE	ATREP5	RC/Helitron	CHH	Hypomethylated in nrpd1a-3 FTL
Chr4	5539400	5540000	AT4TE23180	TE	ATREP3	RC/Helitron	CHH	Hypomethylated in nrpd1a-3 FTL
Chr4	5612600	5612800	AT4TE23520	TE	HELITRONY3	RC/Helitron	CHH	Hypomethylated in nrpd1a-3 FTL
Chr4	5901500	5901553	AT4TE24865	TE	ATLANTYS3	LTR/Gypsy	CHH	Hypomethylated in nrpd1a-3 FTL
Chr4	5901553	5901602	5901553-5901602	Intergenic	-	-	CHH	Hypomethylated in nrpd1a-3 FTL
Chr4	5901602	5901900	AT4TE24870	TE	ATLANTYS2	LTR/Gypsy	CHH	Hypomethylated in nrpd1a-3 FTL
Chr4	6115300	6115600	AT4TE25805	TE	AT9TSD1	DNA/MuDR	CHH	Hypomethylated in nrpd1a-3 FTL
Chr4	6115343	6115600	AT4TE25810	TE	ATREP2	RC/Helitron	CHH	Hypomethylated in nrpd1a-3 FTL
Chr4	6140700	6140900	AT4TE25915	TE	ATREP13	RC/Helitron	CHH	Hypomethylated in nrpd1a-3 FTL
Chr4	6158300	6159000	AT4TE26010	TE	ATREP6	RC/Helitron	CHH	Hypomethylated in nrpd1a-3 FTL
Chr4	6158300	6158535	AT4TE26020	TE	ATREP11	RC/Helitron	CHH	Hypomethylated in nrpd1a-3 FTL
Chr4	6166000	6166400	AT4TE26050	TE	ATREP3	RC/Helitron	CHH	Hypomethylated in nrpd1a-3 FTL
Chr4	6216500	6216700	AT4TE26365	TE	ATHPOGON1	DNA/Pogo	CHH	Hypomethylated in nrpd1a-3 FTL
Chr4	6274000	6274300	AT4TE26665	TE	ATREP6	RC/Helitron	CHH	Hypomethylated in nrpd1a-3 FTL
Chr4	6274600	6275100	AT4TE26665	TE	ATREP6	RC/Helitron	CHH	Hypomethylated in nrpd1a-3 FTL
Chr4	6428900	6429600	AT4TE27445	TE	HELITRONY1B	RC/Helitron	CHH	Hypomethylated in nrpd1a-3 FTL
Chr4	6661100	6661400	AT4TE28555	TE	ATREP2	RC/Helitron	CHH	Hypomethylated in nrpd1a-3 FTL
Chr4	6895200	6895500	AT4G11340	Gene	protein_coding	-	CHH	Hypomethylated in nrpd1a-3 FTL
Chr4	6895200	6895500	AT4TE29715	TE	ATREP2A	RC/Helitron	CHH	Hypomethylated in nrpd1a-3 FTL
Chr4	7040900	7041100	AT4TE30490	TE	ATREP10D	RC/Helitron	CHH	Hypomethylated in nrpd1a-3 FTL
Chr4	7155000	7155400	AT4TE31080	TE	ATREP2A	RC/Helitron	CHH	Hypomethylated in nrpd1a-3 FTL
Chr4	7230700	7231100	AT4TE31485	TE	ATREP1	RC/Helitron	CHH	Hypomethylated in nrpd1a-3 FTL
Chr4	7313200	7313400	AT4TE31850	TE	ATREP4	RC/Helitron	CHH	Hypomethylated in nrpd1a-3 FTL
Chr4	7313214	7313400	AT4TE31855	TE	TNAT2A	DNA	CHH	Hypomethylated in nrpd1a-3 FTL
Chr4	7360100	7360400	AT4TE32060	TE	META1	LTR/Copia	CHH	Hypomethylated in nrpd1a-3 FTL
Chr4	7360800	7361200	AT4TE32060	TE	META1	LTR/Copia	CHH	Hypomethylated in nrpd1a-3 FTL
Chr4	7383600	7384294	AT4TE32165	TE	ATREP1	RC/Helitron	CHH	Hypomethylated in nrpd1a-3 FTL
Chr4	7384294	7384295	7384294-7384295	Intergenic	-	-	CHH	Hypomethylated in nrpd1a-3 FTL
Chr4	7384295	7384300	AT4TE32170	TE	ATREP10D	RC/Helitron	CHH	Hypomethylated in nrpd1a-3 FTL
Chr4	7630300	7630500	AT4TE33365	TE	ATREP10D	RC/Helitron	CHH	Hypomethylated in nrpd1a-3 FTL
Chr4	7817200	7817500	AT4TE34305	TE	META1	LTR/Copia	CHH	Hypomethylated in nrpd1a-3 FTL
Chr4	7817900	7818400	AT4TE34305	TE	META1	LTR/Copia	CHH	Hypomethylated in nrpd1a-3 FTL
Chr4	7838400	7838800	AT4TE34395	TE	ATREP13	RC/Helitron	CHH	Hypomethylated in nrpd1a-3 FTL
Chr4	8064300	8065000	AT4TE35580	TE	ATREP3	RC/Helitron	CHH	Hypomethylated in nrpd1a-3 FTL
Chr4	8421300	8421900	AT4TE37370	TE	ATREP10D	RC/Helitron	CHH	Hypomethylated in nrpd1a-3 FTL
Chr4	8728400	8728700	AT4TE38980	TE	ATREP3	RC/Helitron	CHH	Hypomethylated in nrpd1a-3 FTL
Chr4	8729100	8729300	AT4TE38980	TE	ATREP3	RC/Helitron	CHH	Hypomethylated in nrpd1a-3 FTL
Chr4	8729900	8730200	AT4TE38980	TE	ATREP3	RC/Helitron	CHH	Hypomethylated in nrpd1a-3 FTL
Chr4	8802300	8802504	AT4TE39325	TE	ATREP3	RC/Helitron	CHH	Hypomethylated in nrpd1a-3 FTL
Chr4	8802504	8802505	8802504-8802505	Intergenic	-	-	CHH	Hypomethylated in nrpd1a-3 FTL
Chr4	8802505	8802700	AT4TE39330	TE	HELITRONY3	RC/Helitron	CHH	Hypomethylated in nrpd1a-3 FTL
Chr4	8836700	8836900	AT4G15440	Gene	protein_coding	-	CHH	Hypomethylated in nrpd1a-3 FTL
Chr4	8836700	8836900	AT4TE39495	TE	ATREP13	RC/Helitron	CHH	Hypomethylated in nrpd1a-3 FTL
Chr4	9145300	9145466	9144583-9145466	Intergenic	-	-	CHH	Hypomethylated in nrpd1a-3 FTL
Chr4	9145466	9145542	AT4TE41050	TE	ATREP15	RC/Helitron	CHH	Hypomethylated in nrpd1a-3 FTL
Chr4	9145542	9145543	9145542-9145543	Intergenic	-	-	CHH	Hypomethylated in nrpd1a-3 FTL
Chr4	9145543	9145600	AT4TE41055	TE	ATREP9	RC/Helitron	CHH	Hypomethylated in nrpd1a-3 FTL
Chr4	9146900	9147100	AT4TE41060	TE	ATREP2A	RC/Helitron	CHH	Hypomethylated in nrpd1a-3 FTL
Chr4	9188800	9189100	AT4TE41290	TE	ATREP2A	RC/Helitron	CHH	Hypomethylated in nrpd1a-3 FTL
Chr4	9438800	9439500	AT4TE42635	TE	ATREP3	RC/Helitron	CHH	Hypomethylated in nrpd1a-3 FTL
Chr4	9574200	9574400	AT4TE43250	TE	META1	LTR/Copia	CHH	Hypomethylated in nrpd1a-3 FTL
Chr4	9762100	9762400	AT4TE44220	TE	ATREP3	RC/Helitron	CHH	Hypomethylated in nrpd1a-3 FTL
Chr4	9841800	9842400	AT4TE44650	TE	ATREP3	RC/Helitron	CHH	Hypomethylated in nrpd1a-3 FTL
Chr4	9903900	9904100	9903700-9906366	Intergenic	-	-	CHH	Hypomethylated in nrpd1a-3 FTL
Chr4	9912400	9913600	AT4TE44990	TE	META1	LTR/Copia	CHH	Hypomethylated in nrpd1a-3 FTL
Chr4	9956100	9956400	AT4TE45190	TE	VANDAL8	DNA/MuDR	CHH	Hypomethylated in nrpd1a-3 FTL
Chr4	10395500	10395900	AT4TE47470	TE	ATREP3	RC/Helitron	CHH	Hypomethylated in nrpd1a-3 FTL
Chr4	10396700	10397100	AT4TE47470	TE	ATREP3	RC/Helitron	CHH	Hypomethylated in nrpd1a-3 FTL
Chr4	10871000	10871600	AT4TE49845	TE	ATREP10	RC/Helitron	CHH	Hypomethylated in nrpd1a-3 FTL
Chr4	10899600	10900100	AT4TE49990	TE	META1	LTR/Copia	CHH	Hypomethylated in nrpd1a-3 FTL
Chr4	11192800	11193200	AT4TE51405	TE	ATREP3	RC/Helitron	CHH	Hypomethylated in nrpd1a-3 FTL
Chr4	11361200	11361600	AT4TE52280	TE	ATREP3	RC/Helitron	CHH	Hypomethylated in nrpd1a-3 FTL
Chr4	11362300	11362500	AT4TE52280	TE	ATREP3	RC/Helitron	CHH	Hypomethylated in nrpd1a-3 FTL
Chr4	12365200	12365400	AT4TE57475	TE	ATREP2	RC/Helitron	CHH	Hypomethylated in nrpd1a-3 FTL
Chr4	12698800	12699000	AT4TE59255	TE	ATREP1	RC/Helitron	CHH	Hypomethylated in nrpd1a-3 FTL
Chr4	12863200	12863500	12862570-12864614	Intergenic	-	-	CHH	Hypomethylated in nrpd1a-3 FTL
Chr4	12968000	12968300	AT4TE60685	TE	ATREP2A	RC/Helitron	CHH	Hypomethylated in nrpd1a-3 FTL
Chr4	13537600	13537669	AT4TE63695	TE	ATREP11A	RC/Helitron	CHH	Hypomethylated in nrpd1a-3 FTL
Chr4	13537669	13537670	13537669-13537670	Intergenic	-	-	CHH	Hypomethylated in nrpd1a-3 FTL
Chr4	13537670	13537800	AT4TE63700	TE	ATREP6	RC/Helitron	CHH	Hypomethylated in nrpd1a-3 FTL
Chr4	14390300	14390600	AT4TE68040	TE	ATREP3	RC/Helitron	CHH	Hypomethylated in nrpd1a-3 FTL
Chr4	14458000	14458200	AT4TE68380	TE	ATREP2	RC/Helitron	CHH	Hypomethylated in nrpd1a-3 FTL
Chr4	15012600	15012800	AT4TE71325	TE	VANDAL3	DNA/MuDR	CHH	Hypomethylated in nrpd1a-3 FTL
Chr4	16055100	16055600	AT4G33300	Gene	protein_coding	-	CHH	Hypomethylated in nrpd1a-3 FTL
Chr4	16055100	16055600	AT4TE76870	TE	ATREP10	RC/Helitron	CHH	Hypomethylated in nrpd1a-3 FTL
Chr4	16705500	16705800	16703325-16708552	Intergenic	-	-	CHH	Hypomethylated in nrpd1a-3 FTL
Chr4	16864400	16865100	AT4TE81120	TE	ATREP3	RC/Helitron	CHH	Hypomethylated in nrpd1a-3 FTL
Chr4	17501900	17502200	AT4TE84485	TE	ATREP1	RC/Helitron	CHH	Hypomethylated in nrpd1a-3 FTL
Chr4	17655800	17656000	AT4TE85270	TE	HELITRONY3	RC/Helitron	CHH	Hypomethylated in nrpd1a-3 FTL
Chr4	18232400	18232600	AT4TE88330	TE	ATREP10D	RC/Helitron	CHH	Hypomethylated in nrpd1a-3 FTL
Chr5	70100	70400	AT5TE00230	TE	ATCOPIA27	LTR/Copia	CHH	Hypomethylated in nrpd1a-3 FTL
Chr5	838800	839100	AT5G03400	Gene	protein_coding	-	CHH	Hypomethylated in nrpd1a-3 FTL
Chr5	2187300	2187600	AT5TE07950	TE	ATREP5	RC/Helitron	CHH	Hypomethylated in nrpd1a-3 FTL
Chr5	3018700	3018742	AT5TE10985	TE	ATREP7	RC/Helitron	CHH	Hypomethylated in nrpd1a-3 FTL
Chr5	3018742	3018743	3018742-3018743	Intergenic	-	-	CHH	Hypomethylated in nrpd1a-3 FTL
Chr5	3018743	3018900	AT5TE10990	TE	ATREP3	RC/Helitron	CHH	Hypomethylated in nrpd1a-3 FTL
Chr5	3115700	3116300	AT5TE11330	TE	ATREP5	RC/Helitron	CHH	Hypomethylated in nrpd1a-3 FTL
Chr5	3688500	3688582	3687764-3688582	Intergenic	-	-	CHH	Hypomethylated in nrpd1a-3 FTL
Chr5	3688582	3688773	AT5TE13390	TE	TA11	LINE/L1	CHH	Hypomethylated in nrpd1a-3 FTL
Chr5	3688773	3688800	3688773-3689709	Intergenic	-	-	CHH	Hypomethylated in nrpd1a-3 FTL
Chr5	3903600	3903800	AT5TE14155	TE	ATREP6	RC/Helitron	CHH	Hypomethylated in nrpd1a-3 FTL
Chr5	4312800	4313000	AT5TE15610	TE	ATREP3	RC/Helitron	CHH	Hypomethylated in nrpd1a-3 FTL
Chr5	4314400	4314800	AT5TE15610	TE	ATREP3	RC/Helitron	CHH	Hypomethylated in nrpd1a-3 FTL
Chr5	4780300	4780500	AT5TE17300	TE	ATREP3	RC/Helitron	CHH	Hypomethylated in nrpd1a-3 FTL
Chr5	4781900	4782200	AT5TE17300	TE	ATREP3	RC/Helitron	CHH	Hypomethylated in nrpd1a-3 FTL
Chr5	5428000	5428300	AT5TE19645	TE	ATREP3	RC/Helitron	CHH	Hypomethylated in nrpd1a-3 FTL
Chr5	5976900	5977100	AT5TE21630	TE	ATREP3	RC/Helitron	CHH	Hypomethylated in nrpd1a-3 FTL
Chr5	6420000	6420300	AT5TE23230	TE	ATREP2	RC/Helitron	CHH	Hypomethylated in nrpd1a-3 FTL
Chr5	6634900	6635100	AT5TE24040	TE	ATDNAI27T9A	DNA/MuDR	CHH	Hypomethylated in nrpd1a-3 FTL
Chr5	7153200	7154400	AT5TE25870	TE	ATREP3	RC/Helitron	CHH	Hypomethylated in nrpd1a-3 FTL
Chr5	7417300	7417331	AT5TE26815	TE	ATREP1	RC/Helitron	CHH	Hypomethylated in nrpd1a-3 FTL
Chr5	7417331	7417333	7417331-7417333	Intergenic	-	-	CHH	Hypomethylated in nrpd1a-3 FTL
Chr5	7417333	7417600	AT5TE26820	TE	ATREP2	RC/Helitron	CHH	Hypomethylated in nrpd1a-3 FTL
Chr5	7712300	7712500	AT5TE27905	TE	ATREP3	RC/Helitron	CHH	Hypomethylated in nrpd1a-3 FTL
Chr5	8683400	8683866	AT5TE31395	TE	ATREP3	RC/Helitron	CHH	Hypomethylated in nrpd1a-3 FTL
Chr5	8683866	8683867	8683866-8683867	Intergenic	-	-	CHH	Hypomethylated in nrpd1a-3 FTL
Chr5	8683867	8683900	AT5TE31400	TE	HELITRONY2	RC/Helitron	CHH	Hypomethylated in nrpd1a-3 FTL
Chr5	8745600	8746200	AT5TE31640	TE	ATREP3	RC/Helitron	CHH	Hypomethylated in nrpd1a-3 FTL
Chr5	8766700	8766900	AT5TE31735	TE	ATREP3	RC/Helitron	CHH	Hypomethylated in nrpd1a-3 FTL
Chr5	9134100	9134500	AT5TE33035	TE	ATREP3	RC/Helitron	CHH	Hypomethylated in nrpd1a-3 FTL
Chr5	9291000	9291200	AT5TE33615	TE	TNAT1A	DNA	CHH	Hypomethylated in nrpd1a-3 FTL
Chr5	9372200	9372500	AT5TE33990	TE	ATREP4	RC/Helitron	CHH	Hypomethylated in nrpd1a-3 FTL
Chr5	9557700	9558000	AT5TE34715	TE	ATREP3	RC/Helitron	CHH	Hypomethylated in nrpd1a-3 FTL
Chr5	9558300	9558700	AT5TE34715	TE	ATREP3	RC/Helitron	CHH	Hypomethylated in nrpd1a-3 FTL
Chr5	9590700	9591400	AT5TE34810	TE	ATREP3	RC/Helitron	CHH	Hypomethylated in nrpd1a-3 FTL
Chr5	9611100	9611300	AT5TE34865	TE	ATREP3	RC/Helitron	CHH	Hypomethylated in nrpd1a-3 FTL
Chr5	9613000	9613200	AT5TE34865	TE	ATREP3	RC/Helitron	CHH	Hypomethylated in nrpd1a-3 FTL
Chr5	9963000	9963300	AT5TE36260	TE	ATREP3	RC/Helitron	CHH	Hypomethylated in nrpd1a-3 FTL
Chr5	9964600	9965000	AT5TE36260	TE	ATREP3	RC/Helitron	CHH	Hypomethylated in nrpd1a-3 FTL
Chr5	9978800	9979000	AT5TE36315	TE	ATREP2A	RC/Helitron	CHH	Hypomethylated in nrpd1a-3 FTL
Chr5	9993700	9994200	AT5TE36380	TE	ARNOLDY2	DNA/MuDR	CHH	Hypomethylated in nrpd1a-3 FTL
Chr5	10188000	10188200	AT5TE37120	TE	ATREP3	RC/Helitron	CHH	Hypomethylated in nrpd1a-3 FTL
Chr5	10269200	10269700	AT5TE37495	TE	ATREP6	RC/Helitron	CHH	Hypomethylated in nrpd1a-3 FTL
Chr5	10402200	10402500	AT5TE37975	TE	META1	LTR/Copia	CHH	Hypomethylated in nrpd1a-3 FTL
Chr5	10404900	10405300	AT5TE37975	TE	META1	LTR/Copia	CHH	Hypomethylated in nrpd1a-3 FTL
Chr5	10532300	10532600	AT5TE38415	TE	ARNOLDY1	DNA/MuDR	CHH	Hypomethylated in nrpd1a-3 FTL
Chr5	10714500	10714654	AT5TE39005	TE	ATREP3	RC/Helitron	CHH	Hypomethylated in nrpd1a-3 FTL
Chr5	10714654	10714655	10714654-10714655	Intergenic	-	-	CHH	Hypomethylated in nrpd1a-3 FTL
Chr5	10714655	10715000	AT5TE39010	TE	ATREP15	RC/Helitron	CHH	Hypomethylated in nrpd1a-3 FTL
Chr5	10844400	10844600	AT5TE39420	TE	ARNOLD3	DNA/MuDR	CHH	Hypomethylated in nrpd1a-3 FTL
Chr5	11025400	11025600	AT5TE40040	TE	ATREP3	RC/Helitron	CHH	Hypomethylated in nrpd1a-3 FTL
Chr5	11025900	11026300	AT5TE40040	TE	ATREP3	RC/Helitron	CHH	Hypomethylated in nrpd1a-3 FTL
Chr5	11027300	11027800	AT5TE40050	TE	ATREP3	RC/Helitron	CHH	Hypomethylated in nrpd1a-3 FTL
Chr5	11379000	11379300	AT5TE41200	TE	HELITRONY3	RC/Helitron	CHH	Hypomethylated in nrpd1a-3 FTL
Chr5	11383800	11384300	AT5TE41220	TE	ARNOLDY2	DNA/MuDR	CHH	Hypomethylated in nrpd1a-3 FTL
Chr5	12554700	12555000	AT5TE44470	TE	ATREP11	RC/Helitron	CHH	Hypomethylated in nrpd1a-3 FTL
Chr5	12973900	12973923	AT5TE46170	TE	VANDAL20	DNA/MuDR	CHH	Hypomethylated in nrpd1a-3 FTL
Chr5	12973923	12973924	12973923-12973924	Intergenic	-	-	CHH	Hypomethylated in nrpd1a-3 FTL
Chr5	12973924	12974200	AT5TE46175	TE	VANDAL20	DNA/MuDR	CHH	Hypomethylated in nrpd1a-3 FTL
Chr5	13220300	13220700	AT5TE46975	TE	HELITRONY3	RC/Helitron	CHH	Hypomethylated in nrpd1a-3 FTL
Chr5	13372500	13372700	AT5TE47395	TE	ATGP1	LTR/Gypsy	CHH	Hypomethylated in nrpd1a-3 FTL
Chr5	13656400	13656700	AT5TE48595	TE	ATGP1	LTR/Gypsy	CHH	Hypomethylated in nrpd1a-3 FTL
Chr5	13720700	13720900	AT5TE48830	TE	ATREP15	RC/Helitron	CHH	Hypomethylated in nrpd1a-3 FTL
Chr5	13734000	13734300	AT5TE48920	TE	ATREP1	RC/Helitron	CHH	Hypomethylated in nrpd1a-3 FTL
Chr5	13813800	13814100	AT5TE49235	TE	ARNOLDY1	DNA/MuDR	CHH	Hypomethylated in nrpd1a-3 FTL
Chr5	13918200	13918800	AT5TE49620	TE	ATREP3	RC/Helitron	CHH	Hypomethylated in nrpd1a-3 FTL
Chr5	14080800	14081000	AT5TE50245	TE	ATREP3	RC/Helitron	CHH	Hypomethylated in nrpd1a-3 FTL
Chr5	14082400	14082700	AT5TE50245	TE	ATREP3	RC/Helitron	CHH	Hypomethylated in nrpd1a-3 FTL
Chr5	14104000	14104200	AT5TE50345	TE	ATREP2	RC/Helitron	CHH	Hypomethylated in nrpd1a-3 FTL
Chr5	14149400	14149413	AT5TE50510	TE	ATREP3	RC/Helitron	CHH	Hypomethylated in nrpd1a-3 FTL
Chr5	14149413	14149414	14149413-14149414	Intergenic	-	-	CHH	Hypomethylated in nrpd1a-3 FTL
Chr5	14149414	14149800	AT5TE50515	TE	ATREP3	RC/Helitron	CHH	Hypomethylated in nrpd1a-3 FTL
Chr5	14153100	14153400	AT5TE50535	TE	ATREP4	RC/Helitron	CHH	Hypomethylated in nrpd1a-3 FTL
Chr5	14153197	14153400	AT5TE50540	TE	SIMPLEHAT2	DNA/HAT	CHH	Hypomethylated in nrpd1a-3 FTL
Chr5	14580800	14581000	AT5TE52405	TE	ARNOLDY2	DNA/MuDR	CHH	Hypomethylated in nrpd1a-3 FTL
Chr5	14693800	14694000	AT5TE52920	TE	ATREP10D	RC/Helitron	CHH	Hypomethylated in nrpd1a-3 FTL
Chr5	14760700	14761100	AT5TE53210	TE	ATREP3	RC/Helitron	CHH	Hypomethylated in nrpd1a-3 FTL
Chr5	14847000	14847200	AT5TE53515	TE	ATREP5	RC/Helitron	CHH	Hypomethylated in nrpd1a-3 FTL
Chr5	14880100	14880188	AT5TE53665	TE	RathE1_cons	RathE1_cons	CHH	Hypomethylated in nrpd1a-3 FTL
Chr5	14880188	14880189	14880188-14880189	Intergenic	-	-	CHH	Hypomethylated in nrpd1a-3 FTL
Chr5	14880189	14880800	AT5TE53670	TE	ATREP2A	RC/Helitron	CHH	Hypomethylated in nrpd1a-3 FTL
Chr5	14956200	14956400	AT5TE53945	TE	ATREP13	RC/Helitron	CHH	Hypomethylated in nrpd1a-3 FTL
Chr5	15042700	15042869	AT5TE54310	TE	ATREP3	RC/Helitron	CHH	Hypomethylated in nrpd1a-3 FTL
Chr5	15042700	15043400	AT5TE54320	TE	ATREP3	RC/Helitron	CHH	Hypomethylated in nrpd1a-3 FTL
Chr5	15301800	15302200	AT5TE55375	TE	ATDNA2T9B	DNA/MuDR	CHH	Hypomethylated in nrpd1a-3 FTL
Chr5	15302600	15302800	AT5TE55375	TE	ATDNA2T9B	DNA/MuDR	CHH	Hypomethylated in nrpd1a-3 FTL
Chr5	15535300	15536000	AT5TE56155	TE	ATREP1	RC/Helitron	CHH	Hypomethylated in nrpd1a-3 FTL
Chr5	15576400	15577300	AT5TE56315	TE	ATREP3	RC/Helitron	CHH	Hypomethylated in nrpd1a-3 FTL
Chr5	15605900	15606600	AT5TE56435	TE	ATREP3	RC/Helitron	CHH	Hypomethylated in nrpd1a-3 FTL
Chr5	15716700	15716900	AT5TE56770	TE	ARNOLDY1	DNA/MuDR	CHH	Hypomethylated in nrpd1a-3 FTL
Chr5	15882300	15882500	AT5TE57345	TE	HELITRONY1A	RC/Helitron	CHH	Hypomethylated in nrpd1a-3 FTL
Chr5	15882300	15882500	AT5TE57350	TE	ATREP2	RC/Helitron	CHH	Hypomethylated in nrpd1a-3 FTL
Chr5	15886800	15887000	AT5TE57370	TE	ATREP6	RC/Helitron	CHH	Hypomethylated in nrpd1a-3 FTL
Chr5	16356700	16356900	AT5TE59075	TE	ATREP3	RC/Helitron	CHH	Hypomethylated in nrpd1a-3 FTL
Chr5	16357300	16357700	AT5TE59075	TE	ATREP3	RC/Helitron	CHH	Hypomethylated in nrpd1a-3 FTL
Chr5	16358200	16358500	AT5TE59075	TE	ATREP3	RC/Helitron	CHH	Hypomethylated in nrpd1a-3 FTL
Chr5	17366000	17366300	AT5TE62740	TE	ATREP10D	RC/Helitron	CHH	Hypomethylated in nrpd1a-3 FTL
Chr5	17366600	17367100	AT5TE62740	TE	ATREP10D	RC/Helitron	CHH	Hypomethylated in nrpd1a-3 FTL
Chr5	17366000	17366300	AT5TE62750	TE	ATREP3	RC/Helitron	CHH	Hypomethylated in nrpd1a-3 FTL
Chr5	17366600	17367100	AT5TE62750	TE	ATREP3	RC/Helitron	CHH	Hypomethylated in nrpd1a-3 FTL
Chr5	17398100	17398700	AT5TE62840	TE	ATREP1	RC/Helitron	CHH	Hypomethylated in nrpd1a-3 FTL
Chr5	17543300	17543700	17543257-17544029	Intergenic	-	-	CHH	Hypomethylated in nrpd1a-3 FTL
Chr5	17578500	17579200	AT5TE63560	TE	ATREP6	RC/Helitron	CHH	Hypomethylated in nrpd1a-3 FTL
Chr5	17617900	17618300	AT5TE63650	TE	ATREP3	RC/Helitron	CHH	Hypomethylated in nrpd1a-3 FTL
Chr5	17726400	17726600	AT5TE64040	TE	ATREP2	RC/Helitron	CHH	Hypomethylated in nrpd1a-3 FTL
Chr5	17775700	17776200	AT5TE64195	TE	ATREP3	RC/Helitron	CHH	Hypomethylated in nrpd1a-3 FTL
Chr5	17777500	17777700	AT5TE64195	TE	ATREP3	RC/Helitron	CHH	Hypomethylated in nrpd1a-3 FTL
Chr5	17955700	17956000	AT5TE64790	TE	ATREP1	RC/Helitron	CHH	Hypomethylated in nrpd1a-3 FTL
Chr5	18479900	18480200	AT5TE66530	TE	VANDALNX2	DNA/MuDR	CHH	Hypomethylated in nrpd1a-3 FTL
Chr5	18554600	18554857	AT5TE66775	TE	ATREP10	RC/Helitron	CHH	Hypomethylated in nrpd1a-3 FTL
Chr5	18554857	18554860	18554857-18554860	Intergenic	-	-	CHH	Hypomethylated in nrpd1a-3 FTL
Chr5	18554860	18554897	AT5TE66780	TE	ATREP9	RC/Helitron	CHH	Hypomethylated in nrpd1a-3 FTL
Chr5	18554897	18554898	18554897-18554898	Intergenic	-	-	CHH	Hypomethylated in nrpd1a-3 FTL
Chr5	18554898	18555000	AT5TE66785	TE	ATREP9	RC/Helitron	CHH	Hypomethylated in nrpd1a-3 FTL
Chr5	18853900	18854400	AT5TE67885	TE	ATREP3	RC/Helitron	CHH	Hypomethylated in nrpd1a-3 FTL
Chr5	18854800	18855000	AT5TE67885	TE	ATREP3	RC/Helitron	CHH	Hypomethylated in nrpd1a-3 FTL
Chr5	19019100	19019400	AT5TE68420	TE	ATREP6	RC/Helitron	CHH	Hypomethylated in nrpd1a-3 FTL
Chr5	19101600	19101800	AT5TE68695	TE	ATREP2	RC/Helitron	CHH	Hypomethylated in nrpd1a-3 FTL
Chr5	19479700	19479900	AT5TE70100	TE	VANDAL8	DNA/MuDR	CHH	Hypomethylated in nrpd1a-3 FTL
Chr5	19479700	19479900	AT5TE70105	TE	ATREP2A	RC/Helitron	CHH	Hypomethylated in nrpd1a-3 FTL
Chr5	19741900	19742500	AT5TE71030	TE	ATREP3	RC/Helitron	CHH	Hypomethylated in nrpd1a-3 FTL
Chr5	19912800	19913500	AT5TE71680	TE	ATREP1	RC/Helitron	CHH	Hypomethylated in nrpd1a-3 FTL
Chr5	20280000	20280200	AT5TE73035	TE	ATREP3	RC/Helitron	CHH	Hypomethylated in nrpd1a-3 FTL
Chr5	20281300	20281900	AT5TE73035	TE	ATREP3	RC/Helitron	CHH	Hypomethylated in nrpd1a-3 FTL
Chr5	20398200	20398500	AT5TE73470	TE	ATREP3	RC/Helitron	CHH	Hypomethylated in nrpd1a-3 FTL
Chr5	20674600	20674800	AT5TE74485	TE	ATREP2A	RC/Helitron	CHH	Hypomethylated in nrpd1a-3 FTL
Chr5	20681700	20682000	AT5TE74510	TE	ATREP3	RC/Helitron	CHH	Hypomethylated in nrpd1a-3 FTL
Chr5	21531600	21531800	AT5G53110	Gene	protein_coding	-	CHH	Hypomethylated in nrpd1a-3 FTL
Chr5	21531600	21531800	AT5TE77565	TE	ATREP3	RC/Helitron	CHH	Hypomethylated in nrpd1a-3 FTL
Chr5	21584200	21584204	AT5TE77745	TE	ATREP3	RC/Helitron	CHH	Hypomethylated in nrpd1a-3 FTL
Chr5	21584204	21584205	21584204-21584205	Intergenic	-	-	CHH	Hypomethylated in nrpd1a-3 FTL
Chr5	21584205	21584400	AT5TE77750	TE	ATREP15	RC/Helitron	CHH	Hypomethylated in nrpd1a-3 FTL
Chr5	21776000	21777000	AT5TE78450	TE	ATREP3	RC/Helitron	CHH	Hypomethylated in nrpd1a-3 FTL
Chr5	22335100	22335600	AT5TE80385	TE	ATREP2	RC/Helitron	CHH	Hypomethylated in nrpd1a-3 FTL
Chr5	22463600	22463800	AT5TE80860	TE	ATREP2A	RC/Helitron	CHH	Hypomethylated in nrpd1a-3 FTL
Chr5	23026000	23026066	23025915-23026066	Intergenic	-	-	CHH	Hypomethylated in nrpd1a-3 FTL
Chr5	23026066	23026400	AT5TE82825	TE	ATREP10D	RC/Helitron	CHH	Hypomethylated in nrpd1a-3 FTL
Chr5	23026900	23027300	AT5TE82825	TE	ATREP10D	RC/Helitron	CHH	Hypomethylated in nrpd1a-3 FTL
Chr5	23129900	23130100	AT5TE83195	TE	ATREP1	RC/Helitron	CHH	Hypomethylated in nrpd1a-3 FTL
Chr5	23662100	23662400	AT5TE85095	TE	ATREP2A	RC/Helitron	CHH	Hypomethylated in nrpd1a-3 FTL
Chr5	24185900	24186400	AT5TE87010	TE	ATREP3	RC/Helitron	CHH	Hypomethylated in nrpd1a-3 FTL
Chr5	24187200	24187800	AT5TE87010	TE	ATREP3	RC/Helitron	CHH	Hypomethylated in nrpd1a-3 FTL
Chr5	24435900	24436600	AT5TE87925	TE	ATREP10	RC/Helitron	CHH	Hypomethylated in nrpd1a-3 FTL
Chr5	24448800	24449200	AT5TE87975	TE	ATREP1	RC/Helitron	CHH	Hypomethylated in nrpd1a-3 FTL
Chr5	24448804	24449200	AT5TE87980	TE	ATREP2	RC/Helitron	CHH	Hypomethylated in nrpd1a-3 FTL
Chr5	24475400	24475600	AT5TE88075	TE	ATREP3	RC/Helitron	CHH	Hypomethylated in nrpd1a-3 FTL
Chr5	24586700	24587100	AT5TE88475	TE	ATREP2	RC/Helitron	CHH	Hypomethylated in nrpd1a-3 FTL
Chr5	25178800	25179100	AT5TE90580	TE	ATREP2A	RC/Helitron	CHH	Hypomethylated in nrpd1a-3 FTL
Chr5	25264600	25265100	AT5TE90875	TE	ATREP3	RC/Helitron	CHH	Hypomethylated in nrpd1a-3 FTL
Chr5	25905000	25905200	AT5TE93215	TE	ATREP3	RC/Helitron	CHH	Hypomethylated in nrpd1a-3 FTL
Chr5	26072700	26073000	26072494-26074402	Intergenic	-	-	CHH	Hypomethylated in nrpd1a-3 FTL
Chr5	26483600	26484000	AT5TE95380	TE	ATREP5	RC/Helitron	CHH	Hypomethylated in nrpd1a-3 FTL
Chr5	26484500	26484800	AT5TE95380	TE	ATREP5	RC/Helitron	CHH	Hypomethylated in nrpd1a-3 FTL
Chr1	10982700	10982866	AT1TE35460	TE	ATGP1	LTR/Gypsy	CHH	Hypermethylated in nrpd1a-3 FTL
Chr1	10982866	10982871	10982866-10982871	Intergenic	-	-	CHH	Hypermethylated in nrpd1a-3 FTL
Chr1	10982871	10982900	AT1TE35465	TE	ATGP1	LTR/Gypsy	CHH	Hypermethylated in nrpd1a-3 FTL
Chr3	21059800	21059915	21055597-21059915	Intergenic	-	-	CHH	Hypermethylated in nrpd1a-3 FTL
Chr3	21059915	21060000	AT3G56880	Gene	protein_coding	-	CHH	Hypermethylated in nrpd1a-3 FTL
Chr4	1619100	1619300	AT4TE08245	TE	ATGP1	LTR/Gypsy	CHH	Hypermethylated in nrpd1a-3 FTL
Chr5	439300	439500	AT5G02210	Gene	protein_coding	-	CHH	Hypermethylated in nrpd1a-3 FTL

## Sheet: WT Col-0 vs VC-RTL1
Differentially methylated regions (WT Col-0 vs VC-RTL1)
chr	start	end	Id	type	family	superfamily	context	DMR
Chr1	13810500	13810800	AT1TE45260	TE	ATREP15	RC/Helitron	CG	Hypomethylated in VC-RTL1
Chr2	2939100	2939600	2938180-2940091	Intergenic	-	-	CG	Hypomethylated in VC-RTL1
Chr2	18561700	18561894	18561621-18561894	Intergenic	-	-	CG	Hypomethylated in VC-RTL1
Chr2	18561894	18561900	AT2TE84250	TE	ATIS112A	DNA/Harbinger	CG	Hypomethylated in VC-RTL1
Chr4	248500	248700	246771-248713	Intergenic	-	-	CG	Hypomethylated in VC-RTL1
Chr4	11374400	11374781	11372917-11374781	Intergenic	-	-	CG	Hypomethylated in VC-RTL1
Chr4	11374781	11374800	AT4TE52365	TE	ATENSPM5	DNA/En-Spm	CG	Hypomethylated in VC-RTL1
Chr5	6612300	6612500	6612103-6612815	Intergenic	-	-	CG	Hypomethylated in VC-RTL1
Chr5	10265600	10265800	AT5TE37455	TE	ATENSPM9	DNA/En-Spm	CG	Hypomethylated in VC-RTL1
Chr1	9454000	9454200	9451750-9455368	Intergenic	-	-	CG	Hypermethylated in VC-RTL1
Chr1	10277500	10277700	AT1TE33210	TE	ATLINE1_4	LINE/L1	CG	Hypermethylated in VC-RTL1
Chr1	11495600	11495800	11493713-11496152	Intergenic	-	-	CG	Hypermethylated in VC-RTL1
Chr1	15938200	15938600	AT1G42480	Gene	protein_coding	-	CG	Hypermethylated in VC-RTL1
Chr1	16939400	16939447	AT1TE56120	TE	RathE1_cons	RathE1_cons	CG	Hypermethylated in VC-RTL1
Chr1	16939447	16939600	16939447-16939797	Intergenic	-	-	CG	Hypermethylated in VC-RTL1
Chr1	21963400	21963600	21961235-21968071	Intergenic	-	-	CG	Hypermethylated in VC-RTL1
Chr2	6871500	6871900	AT2G15770	Gene	protein_coding	-	CG	Hypermethylated in VC-RTL1
Chr3	6499000	6499200	6498234-6499415	Intergenic	-	-	CG	Hypermethylated in VC-RTL1
Chr3	11023700	11023749	AT3TE45820	TE	BRODYAGA2	DNA/MuDR	CG	Hypermethylated in VC-RTL1
Chr3	11023749	11023750	11023749-11023750	Intergenic	-	-	CG	Hypermethylated in VC-RTL1
Chr3	11023750	11023774	AT3TE45825	TE	ATREP11	RC/Helitron	CG	Hypermethylated in VC-RTL1
Chr3	11023774	11023775	11023774-11023775	Intergenic	-	-	CG	Hypermethylated in VC-RTL1
Chr3	11023775	11023883	AT3TE45830	TE	BRODYAGA1A	DNA/MuDR	CG	Hypermethylated in VC-RTL1
Chr3	11023883	11023900	11023883-11024007	Intergenic	-	-	CG	Hypermethylated in VC-RTL1
Chr4	15010700	15010900	AT4G30825	Gene	protein_coding	-	CG	Hypermethylated in VC-RTL1
Chr5	2898800	2899000	2898083-2899123	Intergenic	-	-	CG	Hypermethylated in VC-RTL1
Chr5	19567000	19567064	19565857-19567064	Intergenic	-	-	CG	Hypermethylated in VC-RTL1
Chr5	19567064	19567400	AT5G48280	Gene	protein_coding	-	CG	Hypermethylated in VC-RTL1
Chr5	20251100	20251500	AT5G49830	Gene	protein_coding	-	CG	Hypermethylated in VC-RTL1
Chr5	21851000	21851200	AT5G53810	Gene	protein_coding	-	CG	Hypermethylated in VC-RTL1
Chr5	25958400	25958600	AT5G64960	Gene	protein_coding	-	CG	Hypermethylated in VC-RTL1
Chr5	25958400	25958600	AT5G64970	Gene	protein_coding	-	CG	Hypermethylated in VC-RTL1
Chr1	10545200	10545500	AT1G30060	Gene	protein_coding	-	CHG	Hypomethylated in VC-RTL1
Chr1	19729100	19729300	AT1TE65205	TE	HELITRON2	RC/Helitron	CHG	Hypomethylated in VC-RTL1
Chr1	19729100	19729300	AT1TE65210	TE	ATDNA2T9B	DNA/MuDR	CHG	Hypomethylated in VC-RTL1
Chr2	10658200	10659300	AT2G25050	Gene	protein_coding	-	CHG	Hypomethylated in VC-RTL1
Chr3	10641200	10641400	AT3G28410	Gene	protein_coding	-	CHG	Hypomethylated in VC-RTL1
Chr4	4150000	4150200	AT4TE17970	TE	HELITRON4	RC/Helitron	CHG	Hypomethylated in VC-RTL1
Chr4	16325300	16325500	16325295-16326883	Intergenic	-	-	CHG	Hypomethylated in VC-RTL1
Chr5	8613900	8613966	8613683-8613966	Intergenic	-	-	CHG	Hypomethylated in VC-RTL1
Chr5	8613966	8614100	AT5G25000	Gene	protein_coding	-	CHG	Hypomethylated in VC-RTL1
Chr5	10633100	10633300	AT5TE38720	TE	SADHU	Unassigned	CHG	Hypomethylated in VC-RTL1
Chr5	10633100	10633300	AT5TE38725	TE	ATLANTYS2	LTR/Gypsy	CHG	Hypomethylated in VC-RTL1
Chr5	11303500	11303700	AT5TE40960	TE	ATHILA4A	LTR/Gypsy	CHG	Hypomethylated in VC-RTL1
Chr5	14317200	14317396	14316338-14317396	Intergenic	-	-	CHG	Hypomethylated in VC-RTL1
Chr5	14317396	14317500	AT5TE51220	TE	ATREP4	RC/Helitron	CHG	Hypomethylated in VC-RTL1
Chr5	15591900	15592061	AT5TE56385	TE	ATLINE2	LINE/L1	CHG	Hypomethylated in VC-RTL1
Chr5	15592061	15592100	15592061-15592992	Intergenic	-	-	CHG	Hypomethylated in VC-RTL1
Chr5	17076200	17076227	17075856-17076227	Intergenic	-	-	CHG	Hypomethylated in VC-RTL1
Chr5	17076227	17076600	AT5G42635	Gene	protein_coding	-	CHG	Hypomethylated in VC-RTL1
Chr2	10139700	10139785	10139608-10139785	Intergenic	-	-	CHG	Hypermethylated in VC-RTL1
Chr2	10139785	10139900	AT2TE43385	TE	ATREP17	DNA/MuDR	CHG	Hypermethylated in VC-RTL1
Chr1	499400	500100	AT1TE01615	TE	ATREP3	RC/Helitron	CHH	Hypomethylated in VC-RTL1
Chr1	696800	697000	AT1TE02265	TE	ATREP1	RC/Helitron	CHH	Hypomethylated in VC-RTL1
Chr1	1275900	1276300	AT1TE04165	TE	ATREP7	RC/Helitron	CHH	Hypomethylated in VC-RTL1
Chr1	3074200	3074900	AT1TE09970	TE	ATREP3	RC/Helitron	CHH	Hypomethylated in VC-RTL1
Chr1	3414400	3414800	AT1TE11110	TE	ATREP3	RC/Helitron	CHH	Hypomethylated in VC-RTL1
Chr1	3762500	3762800	AT1TE12230	TE	HELITRONY1E	RC/Helitron	CHH	Hypomethylated in VC-RTL1
Chr1	4112700	4112900	AT1TE13375	TE	ARNOLDY1	DNA/MuDR	CHH	Hypomethylated in VC-RTL1
Chr1	4407300	4407600	AT1TE14315	TE	META1	LTR/Copia	CHH	Hypomethylated in VC-RTL1
Chr1	4583100	4583300	AT1TE14865	TE	ATREP2	RC/Helitron	CHH	Hypomethylated in VC-RTL1
Chr1	4785600	4786200	AT1TE15510	TE	ATREP3	RC/Helitron	CHH	Hypomethylated in VC-RTL1
Chr1	5437300	5437700	AT1TE17555	TE	ATREP1	RC/Helitron	CHH	Hypomethylated in VC-RTL1
Chr1	5657400	5657700	AT1TE18285	TE	ATREP13	RC/Helitron	CHH	Hypomethylated in VC-RTL1
Chr1	5863000	5863300	AT1TE18955	TE	ATREP2	RC/Helitron	CHH	Hypomethylated in VC-RTL1
Chr1	6380700	6380900	6380659-6381178	Intergenic	-	-	CHH	Hypomethylated in VC-RTL1
Chr1	6455800	6456000	AT1TE20925	TE	SIMPLEHAT2	DNA/HAT	CHH	Hypomethylated in VC-RTL1
Chr1	6514900	6515300	AT1TE21130	TE	ATREP1	RC/Helitron	CHH	Hypomethylated in VC-RTL1
Chr1	6538700	6539000	AT1TE21210	TE	META1	LTR/Copia	CHH	Hypomethylated in VC-RTL1
Chr1	6539300	6539500	AT1TE21210	TE	META1	LTR/Copia	CHH	Hypomethylated in VC-RTL1
Chr1	6541500	6541700	AT1TE21210	TE	META1	LTR/Copia	CHH	Hypomethylated in VC-RTL1
Chr1	6543100	6543500	AT1TE21210	TE	META1	LTR/Copia	CHH	Hypomethylated in VC-RTL1
Chr1	6707600	6708000	AT1TE21710	TE	META1	LTR/Copia	CHH	Hypomethylated in VC-RTL1
Chr1	6736300	6737100	AT1TE21790	TE	ATREP3	RC/Helitron	CHH	Hypomethylated in VC-RTL1
Chr1	7281700	7282300	AT1TE23505	TE	ATREP5	RC/Helitron	CHH	Hypomethylated in VC-RTL1
Chr1	7783900	7784100	AT1TE25025	TE	ATREP15	RC/Helitron	CHH	Hypomethylated in VC-RTL1
Chr1	7986000	7986400	AT1TE25685	TE	SIMPLEHAT2	DNA/HAT	CHH	Hypomethylated in VC-RTL1
Chr1	8115000	8115300	AT1TE26120	TE	ATREP3	RC/Helitron	CHH	Hypomethylated in VC-RTL1
Chr1	8169900	8170100	AT1TE26305	TE	ATREP7	RC/Helitron	CHH	Hypomethylated in VC-RTL1
Chr1	8489800	8490400	AT1TE27395	TE	ATREP3	RC/Helitron	CHH	Hypomethylated in VC-RTL1
Chr1	9126700	9126900	AT1TE29390	TE	HELITRONY3	RC/Helitron	CHH	Hypomethylated in VC-RTL1
Chr1	9126737	9126900	AT1G26380	Gene	protein_coding	-	CHH	Hypomethylated in VC-RTL1
Chr1	9384400	9384800	AT1TE30240	TE	ATREP1	RC/Helitron	CHH	Hypomethylated in VC-RTL1
Chr1	9754600	9754800	9753952-9756656	Intergenic	-	-	CHH	Hypomethylated in VC-RTL1
Chr1	9817000	9817500	AT1TE31590	TE	ATREP3	RC/Helitron	CHH	Hypomethylated in VC-RTL1
Chr1	9865800	9866100	AT1TE31775	TE	ATREP3	RC/Helitron	CHH	Hypomethylated in VC-RTL1
Chr1	9867200	9867400	AT1TE31775	TE	ATREP3	RC/Helitron	CHH	Hypomethylated in VC-RTL1
Chr1	9867366	9867400	AT1TE31780	TE	ATREP3	RC/Helitron	CHH	Hypomethylated in VC-RTL1
Chr1	10156000	10156200	AT1TE32765	TE	VANDAL1N1	DNA/MuDR	CHH	Hypomethylated in VC-RTL1
Chr1	10526900	10527100	AT1TE34015	TE	HELITRONY3	RC/Helitron	CHH	Hypomethylated in VC-RTL1
Chr1	10591400	10591988	AT1TE34255	TE	ATREP2	RC/Helitron	CHH	Hypomethylated in VC-RTL1
Chr1	10591988	10591989	10591988-10591989	Intergenic	-	-	CHH	Hypomethylated in VC-RTL1
Chr1	10591989	10592000	AT1TE34260	TE	ATREP1	RC/Helitron	CHH	Hypomethylated in VC-RTL1
Chr1	10852900	10853200	AT1TE35060	TE	ATREP2	RC/Helitron	CHH	Hypomethylated in VC-RTL1
Chr1	11701400	11701600	AT1TE37890	TE	ATREP3	RC/Helitron	CHH	Hypomethylated in VC-RTL1
Chr1	11754100	11754500	AT1TE38090	TE	VANDAL2N1	DNA/MuDR	CHH	Hypomethylated in VC-RTL1
Chr1	11895700	11896000	AT1TE38530	TE	ARNOLD2	DNA/MuDR	CHH	Hypomethylated in VC-RTL1
Chr1	12329300	12329700	AT1TE40090	TE	ATREP3	RC/Helitron	CHH	Hypomethylated in VC-RTL1
Chr1	12365700	12365900	AT1TE40240	TE	ATREP3	RC/Helitron	CHH	Hypomethylated in VC-RTL1
Chr1	12563000	12563300	AT1TE40925	TE	ATREP3	RC/Helitron	CHH	Hypomethylated in VC-RTL1
Chr1	12563600	12563900	AT1TE40925	TE	ATREP3	RC/Helitron	CHH	Hypomethylated in VC-RTL1
Chr1	12876600	12876830	AT1TE41905	TE	ATREP3	RC/Helitron	CHH	Hypomethylated in VC-RTL1
Chr1	12876830	12876831	12876830-12876831	Intergenic	-	-	CHH	Hypomethylated in VC-RTL1
Chr1	12876831	12876900	AT1TE41910	TE	ATREP3	RC/Helitron	CHH	Hypomethylated in VC-RTL1
Chr1	13017100	13017600	AT1TE42430	TE	ATREP3	RC/Helitron	CHH	Hypomethylated in VC-RTL1
Chr1	13059500	13059700	AT1TE42635	TE	ATREP3	RC/Helitron	CHH	Hypomethylated in VC-RTL1
Chr1	13260100	13260166	13259196-13260166	Intergenic	-	-	CHH	Hypomethylated in VC-RTL1
Chr1	13260166	13260300	AT1TE43340	TE	ATREP10D	RC/Helitron	CHH	Hypomethylated in VC-RTL1
Chr1	13261400	13261600	AT1TE43350	TE	ATREP3	RC/Helitron	CHH	Hypomethylated in VC-RTL1
Chr1	13567500	13567700	AT1TE44395	TE	ARNOLDY2	DNA/MuDR	CHH	Hypomethylated in VC-RTL1
Chr1	13568000	13568163	AT1TE44395	TE	ARNOLDY2	DNA/MuDR	CHH	Hypomethylated in VC-RTL1
Chr1	13568163	13568164	13568163-13568164	Intergenic	-	-	CHH	Hypomethylated in VC-RTL1
Chr1	13568164	13568200	AT1TE44400	TE	ARNOLDY2	DNA/MuDR	CHH	Hypomethylated in VC-RTL1
Chr1	13572400	13573100	AT1TE44435	TE	HELITRONY3	RC/Helitron	CHH	Hypomethylated in VC-RTL1
Chr1	13639900	13640100	13638897-13640508	Intergenic	-	-	CHH	Hypomethylated in VC-RTL1
Chr1	13780100	13780300	AT1TE45145	TE	ATLANTYS2	LTR/Gypsy	CHH	Hypomethylated in VC-RTL1
Chr1	13780100	13780300	AT1TE45150	TE	ATHILA4B_LTR	LTR/Gypsy	CHH	Hypomethylated in VC-RTL1
Chr1	13879100	13879300	AT1TE45530	TE	ATREP2A	RC/Helitron	CHH	Hypomethylated in VC-RTL1
Chr1	13889800	13890000	AT1TE45560	TE	ATGP1	LTR/Gypsy	CHH	Hypomethylated in VC-RTL1
Chr1	13979100	13979218	13979086-13979218	Intergenic	-	-	CHH	Hypomethylated in VC-RTL1
Chr1	13979218	13979451	AT1TE45885	TE	ATDNAI27T9C	DNA/MuDR	CHH	Hypomethylated in VC-RTL1
Chr1	13979451	13979500	13979451-13979609	Intergenic	-	-	CHH	Hypomethylated in VC-RTL1
Chr1	14701500	14701700	14674639-14714187	Intergenic	-	-	CHH	Hypomethylated in VC-RTL1
Chr1	14726700	14727100	14717861-14746646	Intergenic	-	-	CHH	Hypomethylated in VC-RTL1
Chr1	14737800	14738200	14717861-14746646	Intergenic	-	-	CHH	Hypomethylated in VC-RTL1
Chr1	14944500	14944800	14926963-14998919	Intergenic	-	-	CHH	Hypomethylated in VC-RTL1
Chr1	15009700	15009900	15009586-15038155	Intergenic	-	-	CHH	Hypomethylated in VC-RTL1
Chr1	15088300	15088500	AT1TE49370	TE	ATREP18	DNA	CHH	Hypomethylated in VC-RTL1
Chr1	15750800	15751200	AT1TE51850	TE	ATHILA4A	LTR/Gypsy	CHH	Hypomethylated in VC-RTL1
Chr1	15940600	15941100	AT1TE52535	TE	ATREP3	RC/Helitron	CHH	Hypomethylated in VC-RTL1
Chr1	16114600	16114784	AT1TE53065	TE	ATHILA4A	LTR/Gypsy	CHH	Hypomethylated in VC-RTL1
Chr1	16114784	16114800	16114784-16115818	Intergenic	-	-	CHH	Hypomethylated in VC-RTL1
Chr1	16258700	16258900	AT1TE53540	TE	HELITRONY3	RC/Helitron	CHH	Hypomethylated in VC-RTL1
Chr1	16381000	16381300	AT1TE53995	TE	ATGP1	LTR/Gypsy	CHH	Hypomethylated in VC-RTL1
Chr1	16400700	16400900	AT1TE54020	TE	ATREP2	RC/Helitron	CHH	Hypomethylated in VC-RTL1
Chr1	16423400	16423600	AT1TE54120	TE	HELITRONY1B	RC/Helitron	CHH	Hypomethylated in VC-RTL1
Chr1	16423400	16423514	AT1TE54135	TE	HELITRONY1B	RC/Helitron	CHH	Hypomethylated in VC-RTL1
Chr1	16477800	16478000	AT1TE54370	TE	ATREP13	RC/Helitron	CHH	Hypomethylated in VC-RTL1
Chr1	16712100	16712140	AT1TE55195	TE	ATREP7	RC/Helitron	CHH	Hypomethylated in VC-RTL1
Chr1	16712140	16712141	16712140-16712141	Intergenic	-	-	CHH	Hypomethylated in VC-RTL1
Chr1	16712141	16712500	AT1TE55200	TE	ATREP7	RC/Helitron	CHH	Hypomethylated in VC-RTL1
Chr1	16903800	16904000	AT1TE55985	TE	ATREP3	RC/Helitron	CHH	Hypomethylated in VC-RTL1
Chr1	16904900	16905200	AT1TE55985	TE	ATREP3	RC/Helitron	CHH	Hypomethylated in VC-RTL1
Chr1	16967600	16967800	AT1TE56170	TE	ATREP5	RC/Helitron	CHH	Hypomethylated in VC-RTL1
Chr1	16989100	16989600	AT1TE56255	TE	ATREP5	RC/Helitron	CHH	Hypomethylated in VC-RTL1
Chr1	16989100	16989600	AT1TE56260	TE	ATREP5	RC/Helitron	CHH	Hypomethylated in VC-RTL1
Chr1	17551700	17552200	AT1TE58195	TE	ATREP3	RC/Helitron	CHH	Hypomethylated in VC-RTL1
Chr1	17551700	17552174	AT1TE58205	TE	ATHATN7	DNA/HAT	CHH	Hypomethylated in VC-RTL1
Chr1	17632600	17632900	AT1TE58525	TE	ATREP2A	RC/Helitron	CHH	Hypomethylated in VC-RTL1
Chr1	17685700	17686000	AT1TE58725	TE	ATREP6	RC/Helitron	CHH	Hypomethylated in VC-RTL1
Chr1	18325800	18326000	AT1TE60740	TE	ATREP10D	RC/Helitron	CHH	Hypomethylated in VC-RTL1
Chr1	18746800	18747000	AT1TE62140	TE	ATREP3	RC/Helitron	CHH	Hypomethylated in VC-RTL1
Chr1	18791000	18791400	AT1TE62285	TE	ATREP3	RC/Helitron	CHH	Hypomethylated in VC-RTL1
Chr1	19026900	19027300	AT1TE63030	TE	HELITRONY3	RC/Helitron	CHH	Hypomethylated in VC-RTL1
Chr1	19063000	19063400	AT1TE63170	TE	ATREP3	RC/Helitron	CHH	Hypomethylated in VC-RTL1
Chr1	19064300	19064500	AT1TE63170	TE	ATREP3	RC/Helitron	CHH	Hypomethylated in VC-RTL1
Chr1	19073300	19073478	19073193-19073478	Intergenic	-	-	CHH	Hypomethylated in VC-RTL1
Chr1	19073478	19073500	AT1TE63195	TE	ATMUN1	DNA/MuDR	CHH	Hypomethylated in VC-RTL1
Chr1	19172500	19172700	AT1TE63525	TE	ATREP3	RC/Helitron	CHH	Hypomethylated in VC-RTL1
Chr1	19172500	19172700	AT1TE63530	TE	ATHATN7	DNA/HAT	CHH	Hypomethylated in VC-RTL1
Chr1	19327300	19327800	AT1TE64055	TE	ATREP3	RC/Helitron	CHH	Hypomethylated in VC-RTL1
Chr1	19328700	19329000	AT1TE64055	TE	ATREP3	RC/Helitron	CHH	Hypomethylated in VC-RTL1
Chr1	19465700	19466200	AT1TE64445	TE	ATREP3	RC/Helitron	CHH	Hypomethylated in VC-RTL1
Chr1	19716100	19716393	19714878-19716393	Intergenic	-	-	CHH	Hypomethylated in VC-RTL1
Chr1	19716393	19716455	AT1TE65155	TE	HELITRONY1E	RC/Helitron	CHH	Hypomethylated in VC-RTL1
Chr1	19716402	19716500	AT1G52940	Gene	protein_coding	-	CHH	Hypomethylated in VC-RTL1
Chr1	19718000	19718200	AT1G52940	Gene	protein_coding	-	CHH	Hypomethylated in VC-RTL1
Chr1	19716456	19716500	AT1TE65160	TE	ATREP10D	RC/Helitron	CHH	Hypomethylated in VC-RTL1
Chr1	19718000	19718200	AT1TE65160	TE	ATREP10D	RC/Helitron	CHH	Hypomethylated in VC-RTL1
Chr1	19718000	19718200	AT1TE65165	TE	ATREP2A	RC/Helitron	CHH	Hypomethylated in VC-RTL1
Chr1	19995100	19995300	AT1TE66090	TE	ATREP3	RC/Helitron	CHH	Hypomethylated in VC-RTL1
Chr1	20973900	20974100	AT1TE69270	TE	ATREP5	RC/Helitron	CHH	Hypomethylated in VC-RTL1
Chr1	21034300	21034900	21034260-21035618	Intergenic	-	-	CHH	Hypomethylated in VC-RTL1
Chr1	21128200	21128400	AT1TE69835	TE	ATREP1	RC/Helitron	CHH	Hypomethylated in VC-RTL1
Chr1	21211100	21211300	AT1TE70100	TE	HELITRONY3	RC/Helitron	CHH	Hypomethylated in VC-RTL1
Chr1	21615700	21616100	AT1TE71330	TE	ATREP1	RC/Helitron	CHH	Hypomethylated in VC-RTL1
Chr1	21681500	21681523	21681096-21681523	Intergenic	-	-	CHH	Hypomethylated in VC-RTL1
Chr1	21681523	21681900	AT1TE71540	TE	HELITRONY3	RC/Helitron	CHH	Hypomethylated in VC-RTL1
Chr1	22163600	22163800	AT1TE73175	TE	VANDAL22	DNA/MuDR	CHH	Hypomethylated in VC-RTL1
Chr1	22451600	22452000	AT1TE74085	TE	ATREP3	RC/Helitron	CHH	Hypomethylated in VC-RTL1
Chr1	22620700	22620900	AT1TE74615	TE	ATREP3	RC/Helitron	CHH	Hypomethylated in VC-RTL1
Chr1	22621900	22622300	AT1TE74615	TE	ATREP3	RC/Helitron	CHH	Hypomethylated in VC-RTL1
Chr1	22993600	22993800	AT1TE75780	TE	ATREP3	RC/Helitron	CHH	Hypomethylated in VC-RTL1
Chr1	23553800	23554200	AT1TE77560	TE	ATREP3	RC/Helitron	CHH	Hypomethylated in VC-RTL1
Chr1	23876700	23877100	AT1TE78560	TE	ATREP3	RC/Helitron	CHH	Hypomethylated in VC-RTL1
Chr1	25962800	25963000	AT1TE85075	TE	ATREP3	RC/Helitron	CHH	Hypomethylated in VC-RTL1
Chr1	26169900	26170100	AT1TE85730	TE	ATREP3	RC/Helitron	CHH	Hypomethylated in VC-RTL1
Chr1	26170700	26170900	AT1TE85730	TE	ATREP3	RC/Helitron	CHH	Hypomethylated in VC-RTL1
Chr1	26551600	26552000	AT1TE86940	TE	ATREP13	RC/Helitron	CHH	Hypomethylated in VC-RTL1
Chr1	27860600	27860900	AT1TE91165	TE	HELITRONY3	RC/Helitron	CHH	Hypomethylated in VC-RTL1
Chr1	28162000	28162300	AT1TE92165	TE	ATREP3	RC/Helitron	CHH	Hypomethylated in VC-RTL1
Chr1	28398300	28398600	AT1TE92905	TE	ATREP10B	RC/Helitron	CHH	Hypomethylated in VC-RTL1
Chr1	29244300	29244500	AT1TE95675	TE	ATREP2	RC/Helitron	CHH	Hypomethylated in VC-RTL1
Chr1	29319900	29320300	AT1G77990	Gene	protein_coding	-	CHH	Hypomethylated in VC-RTL1
Chr1	29319900	29320300	AT1TE95915	TE	ATREP3	RC/Helitron	CHH	Hypomethylated in VC-RTL1
Chr1	30251800	30252600	AT1TE98910	TE	ATREP3	RC/Helitron	CHH	Hypomethylated in VC-RTL1
Chr1	30255000	30255400	AT1TE98920	TE	ATREP3	RC/Helitron	CHH	Hypomethylated in VC-RTL1
Chr2	67100	67400	AT2TE00115	TE	ATGP1	LTR/Gypsy	CHH	Hypomethylated in VC-RTL1
Chr2	257600	257800	257550-262038	Intergenic	-	-	CHH	Hypomethylated in VC-RTL1
Chr2	395000	396000	AT2TE01630	TE	ATREP3	RC/Helitron	CHH	Hypomethylated in VC-RTL1
Chr2	500100	500400	AT2TE02160	TE	ATREP3	RC/Helitron	CHH	Hypomethylated in VC-RTL1
Chr2	511100	511300	AT2TE02190	TE	HELITRONY1E	RC/Helitron	CHH	Hypomethylated in VC-RTL1
Chr2	707800	708300	AT2TE03055	TE	ATREP3	RC/Helitron	CHH	Hypomethylated in VC-RTL1
Chr2	716100	716300	AT2TE03100	TE	ATREP6	RC/Helitron	CHH	Hypomethylated in VC-RTL1
Chr2	787000	787200	AT2TE03465	TE	ATREP10D	RC/Helitron	CHH	Hypomethylated in VC-RTL1
Chr2	795000	795400	AT2TE03505	TE	ATREP6	RC/Helitron	CHH	Hypomethylated in VC-RTL1
Chr2	872000	872200	AT2TE03875	TE	HELITRONY3	RC/Helitron	CHH	Hypomethylated in VC-RTL1
Chr2	878000	878200	877207-878351	Intergenic	-	-	CHH	Hypomethylated in VC-RTL1
Chr2	932900	933400	AT2TE04145	TE	ATREP15	RC/Helitron	CHH	Hypomethylated in VC-RTL1
Chr2	933324	933400	AT2TE04150	TE	ATENSPM2	DNA/En-Spm	CHH	Hypomethylated in VC-RTL1
Chr2	1256700	1256731	AT2TE05685	TE	ATREP15	RC/Helitron	CHH	Hypomethylated in VC-RTL1
Chr2	1256731	1256732	1256731-1256732	Intergenic	-	-	CHH	Hypomethylated in VC-RTL1
Chr2	1256732	1256831	AT2TE05690	TE	HELITRONY1D	RC/Helitron	CHH	Hypomethylated in VC-RTL1
Chr2	1256831	1256832	1256831-1256832	Intergenic	-	-	CHH	Hypomethylated in VC-RTL1
Chr2	1256832	1256900	AT2TE05695	TE	HELITRONY1D	RC/Helitron	CHH	Hypomethylated in VC-RTL1
Chr2	1465700	1465773	AT2TE06790	TE	VANDAL22	DNA/MuDR	CHH	Hypomethylated in VC-RTL1
Chr2	1465773	1466600	1465773-1466772	Intergenic	-	-	CHH	Hypomethylated in VC-RTL1
Chr2	1546300	1546532	AT2TE07125	TE	SIMPLEHAT2	DNA/HAT	CHH	Hypomethylated in VC-RTL1
Chr2	1546532	1546533	1546532-1546533	Intergenic	-	-	CHH	Hypomethylated in VC-RTL1
Chr2	1546533	1546600	AT2TE07130	TE	HELITRONY1C	RC/Helitron	CHH	Hypomethylated in VC-RTL1
Chr2	1586500	1586900	1585622-1587376	Intergenic	-	-	CHH	Hypomethylated in VC-RTL1
Chr2	1617000	1617300	AT2TE07460	TE	META1	LTR/Copia	CHH	Hypomethylated in VC-RTL1
Chr2	1617600	1617800	AT2TE07460	TE	META1	LTR/Copia	CHH	Hypomethylated in VC-RTL1
Chr2	1642400	1642600	AT2TE07570	TE	ATREP5	RC/Helitron	CHH	Hypomethylated in VC-RTL1
Chr2	1691100	1691111	AT2TE07830	TE	ATREP15	RC/Helitron	CHH	Hypomethylated in VC-RTL1
Chr2	1691111	1691112	1691111-1691112	Intergenic	-	-	CHH	Hypomethylated in VC-RTL1
Chr2	1691112	1691137	AT2TE07835	TE	ATREP7	RC/Helitron	CHH	Hypomethylated in VC-RTL1
Chr2	1691137	1691138	1691137-1691138	Intergenic	-	-	CHH	Hypomethylated in VC-RTL1
Chr2	1691138	1691300	AT2TE07840	TE	ATREP7	RC/Helitron	CHH	Hypomethylated in VC-RTL1
Chr2	1855400	1855600	1854903-1856347	Intergenic	-	-	CHH	Hypomethylated in VC-RTL1
Chr2	1930200	1930400	AT2TE08865	TE	HELITRONY1B	RC/Helitron	CHH	Hypomethylated in VC-RTL1
Chr2	2139800	2139870	AT2TE09765	TE	ATREP6	RC/Helitron	CHH	Hypomethylated in VC-RTL1
Chr2	2139870	2139871	2139870-2139871	Intergenic	-	-	CHH	Hypomethylated in VC-RTL1
Chr2	2139871	2139930	AT2TE09770	TE	ATREP6	RC/Helitron	CHH	Hypomethylated in VC-RTL1
Chr2	2139930	2139931	2139930-2139931	Intergenic	-	-	CHH	Hypomethylated in VC-RTL1
Chr2	2139931	2139974	AT2TE09775	TE	ATREP8	RC/Helitron	CHH	Hypomethylated in VC-RTL1
Chr2	2139974	2139989	2139974-2139989	Intergenic	-	-	CHH	Hypomethylated in VC-RTL1
Chr2	2139989	2140000	AT2TE09780	TE	HELITRONY3	RC/Helitron	CHH	Hypomethylated in VC-RTL1
Chr2	2219200	2219500	AT2TE10255	TE	ATREP11	RC/Helitron	CHH	Hypomethylated in VC-RTL1
Chr2	2654200	2654400	AT2TE11840	TE	HELITRONY3	RC/Helitron	CHH	Hypomethylated in VC-RTL1
Chr2	2961500	2961700	AT2TE12890	TE	ATREP13	RC/Helitron	CHH	Hypomethylated in VC-RTL1
Chr2	4098400	4099000	AT2TE17320	TE	HELITRONY3	RC/Helitron	CHH	Hypomethylated in VC-RTL1
Chr2	4451300	4451500	AT2TE18685	TE	ATREP6	RC/Helitron	CHH	Hypomethylated in VC-RTL1
Chr2	4471800	4472100	AT2TE18735	TE	ATREP13	RC/Helitron	CHH	Hypomethylated in VC-RTL1
Chr2	5010300	5010600	AT2TE20540	TE	ATREP2	RC/Helitron	CHH	Hypomethylated in VC-RTL1
Chr2	5120200	5120400	AT2TE21010	TE	ARNOLDY2	DNA/MuDR	CHH	Hypomethylated in VC-RTL1
Chr2	5238100	5238300	AT2TE21365	TE	ATGP1	LTR/Gypsy	CHH	Hypomethylated in VC-RTL1
Chr2	5607500	5607739	AT2TE22655	TE	ATREP10A	RC/Helitron	CHH	Hypomethylated in VC-RTL1
Chr2	5607739	5607740	5607739-5607740	Intergenic	-	-	CHH	Hypomethylated in VC-RTL1
Chr2	5607740	5607800	AT2TE22660	TE	ATREP10B	RC/Helitron	CHH	Hypomethylated in VC-RTL1
Chr2	5807400	5807651	AT2TE23655	TE	HELITRONY3	RC/Helitron	CHH	Hypomethylated in VC-RTL1
Chr2	5807651	5807652	5807651-5807652	Intergenic	-	-	CHH	Hypomethylated in VC-RTL1
Chr2	5807652	5807800	AT2TE23660	TE	ATGP1	LTR/Gypsy	CHH	Hypomethylated in VC-RTL1
Chr2	5808600	5808800	AT2TE23665	TE	ATGP1	LTR/Gypsy	CHH	Hypomethylated in VC-RTL1
Chr2	5808800	5808801	5808800-5808801	Intergenic	-	-	CHH	Hypomethylated in VC-RTL1
Chr2	5808801	5808900	AT2TE23670	TE	ATGP1	LTR/Gypsy	CHH	Hypomethylated in VC-RTL1
Chr2	5814800	5814890	AT2TE23670	TE	ATGP1	LTR/Gypsy	CHH	Hypomethylated in VC-RTL1
Chr2	5814890	5814899	5814890-5814899	Intergenic	-	-	CHH	Hypomethylated in VC-RTL1
Chr2	5814899	5815248	AT2TE23675	TE	HELITRONY3	RC/Helitron	CHH	Hypomethylated in VC-RTL1
Chr2	5815248	5815249	5815248-5815249	Intergenic	-	-	CHH	Hypomethylated in VC-RTL1
Chr2	5815249	5815300	AT2TE23680	TE	VANDAL2N1	DNA/MuDR	CHH	Hypomethylated in VC-RTL1
Chr2	5870400	5870600	AT2TE23905	TE	ATREP5	RC/Helitron	CHH	Hypomethylated in VC-RTL1
Chr2	5871500	5871700	AT2TE23905	TE	ATREP5	RC/Helitron	CHH	Hypomethylated in VC-RTL1
Chr2	6100300	6100500	AT2TE24820	TE	ATREP3	RC/Helitron	CHH	Hypomethylated in VC-RTL1
Chr2	6207000	6207200	AT2TE25260	TE	HELITRONY1D	RC/Helitron	CHH	Hypomethylated in VC-RTL1
Chr2	6218400	6218600	AT2TE25335	TE	ATCOPIA64	LTR/Copia	CHH	Hypomethylated in VC-RTL1
Chr2	6264200	6264400	AT2TE25540	TE	ATGP1	LTR/Gypsy	CHH	Hypomethylated in VC-RTL1
Chr2	6269800	6270000	AT2TE25540	TE	ATGP1	LTR/Gypsy	CHH	Hypomethylated in VC-RTL1
Chr2	6383400	6383600	AT2TE26035	TE	ATREP3	RC/Helitron	CHH	Hypomethylated in VC-RTL1
Chr2	6397500	6397659	AT2TE26100	TE	ATREP15	RC/Helitron	CHH	Hypomethylated in VC-RTL1
Chr2	6397659	6397660	6397659-6397660	Intergenic	-	-	CHH	Hypomethylated in VC-RTL1
Chr2	6397660	6397700	AT2TE26105	TE	ATREP3	RC/Helitron	CHH	Hypomethylated in VC-RTL1
Chr2	6659500	6659670	AT2TE27160	TE	ARNOLDY1	DNA/MuDR	CHH	Hypomethylated in VC-RTL1
Chr2	6659670	6659671	6659670-6659671	Intergenic	-	-	CHH	Hypomethylated in VC-RTL1
Chr2	6659671	6660000	AT2TE27165	TE	ARNOLDY2	DNA/MuDR	CHH	Hypomethylated in VC-RTL1
Chr2	6914500	6914586	AT2TE28160	TE	ATCOPIA38	LTR/Copia	CHH	Hypomethylated in VC-RTL1
Chr2	6914586	6914700	6914586-6918039	Intergenic	-	-	CHH	Hypomethylated in VC-RTL1
Chr2	6923900	6924100	AT2TE28205	TE	ATREP3	RC/Helitron	CHH	Hypomethylated in VC-RTL1
Chr2	6924700	6925300	AT2TE28205	TE	ATREP3	RC/Helitron	CHH	Hypomethylated in VC-RTL1
Chr2	7096100	7096194	AT2TE28860	TE	ATHILA4D_LTR	LTR/Gypsy	CHH	Hypomethylated in VC-RTL1
Chr2	7096194	7096400	7096194-7097280	Intergenic	-	-	CHH	Hypomethylated in VC-RTL1
Chr2	7112700	7112900	AT2TE28950	TE	ATREP3	RC/Helitron	CHH	Hypomethylated in VC-RTL1
Chr2	7176800	7177000	AT2TE29225	TE	ATREP1	RC/Helitron	CHH	Hypomethylated in VC-RTL1
Chr2	7178200	7178600	AT2TE29225	TE	ATREP1	RC/Helitron	CHH	Hypomethylated in VC-RTL1
Chr2	7347800	7348100	AT2TE30005	TE	ATREP7	RC/Helitron	CHH	Hypomethylated in VC-RTL1
Chr2	7813500	7814400	AT2TE32315	TE	ATREP3	RC/Helitron	CHH	Hypomethylated in VC-RTL1
Chr2	7959900	7960100	AT2TE33015	TE	ATREP3	RC/Helitron	CHH	Hypomethylated in VC-RTL1
Chr2	8157600	8157622	AT2TE33895	TE	ATREP15	RC/Helitron	CHH	Hypomethylated in VC-RTL1
Chr2	8157622	8157623	8157622-8157623	Intergenic	-	-	CHH	Hypomethylated in VC-RTL1
Chr2	8157623	8157719	AT2TE33900	TE	ATREP10B	RC/Helitron	CHH	Hypomethylated in VC-RTL1
Chr2	8157719	8157800	8157719-8158198	Intergenic	-	-	CHH	Hypomethylated in VC-RTL1
Chr2	8237000	8237300	AT2TE34275	TE	ATREP6	RC/Helitron	CHH	Hypomethylated in VC-RTL1
Chr2	8421700	8421900	AT2TE35115	TE	ATREP5	RC/Helitron	CHH	Hypomethylated in VC-RTL1
Chr2	8854400	8854700	AT2TE37235	TE	ATREP10	RC/Helitron	CHH	Hypomethylated in VC-RTL1
Chr2	8907600	8907900	AT2TE37495	TE	ATREP2A	RC/Helitron	CHH	Hypomethylated in VC-RTL1
Chr2	9030500	9030696	AT2TE38110	TE	ATREP1	RC/Helitron	CHH	Hypomethylated in VC-RTL1
Chr2	9030696	9030697	9030696-9030697	Intergenic	-	-	CHH	Hypomethylated in VC-RTL1
Chr2	9030697	9030700	AT2TE38115	TE	HELITRONY1A	RC/Helitron	CHH	Hypomethylated in VC-RTL1
Chr2	9314100	9314600	AT2TE39520	TE	HELITRONY3	RC/Helitron	CHH	Hypomethylated in VC-RTL1
Chr2	9433200	9433400	AT2TE40090	TE	ATREP1	RC/Helitron	CHH	Hypomethylated in VC-RTL1
Chr2	9639400	9639700	AT2TE41110	TE	ATREP11	RC/Helitron	CHH	Hypomethylated in VC-RTL1
Chr2	10018500	10018800	AT2TE42855	TE	ATREP5	RC/Helitron	CHH	Hypomethylated in VC-RTL1
Chr2	10128800	10129200	10127521-10131489	Intergenic	-	-	CHH	Hypomethylated in VC-RTL1
Chr2	10351600	10351800	AT2TE44355	TE	ATREP10	RC/Helitron	CHH	Hypomethylated in VC-RTL1
Chr2	10520400	10520549	AT2G24710	Gene	protein_coding	-	CHH	Hypomethylated in VC-RTL1
Chr2	10520549	10520600	10520549-10521475	Intergenic	-	-	CHH	Hypomethylated in VC-RTL1
Chr2	10683500	10683546	AT2TE45800	TE	ATREP10B	RC/Helitron	CHH	Hypomethylated in VC-RTL1
Chr2	10683546	10683547	10683546-10683547	Intergenic	-	-	CHH	Hypomethylated in VC-RTL1
Chr2	10683547	10683700	AT2TE45805	TE	ATREP10B	RC/Helitron	CHH	Hypomethylated in VC-RTL1
Chr2	11285100	11285700	AT2TE48795	TE	ATREP3	RC/Helitron	CHH	Hypomethylated in VC-RTL1
Chr2	11341400	11341600	11340950-11341684	Intergenic	-	-	CHH	Hypomethylated in VC-RTL1
Chr2	12555100	12555700	AT2TE54845	TE	ATREP3	RC/Helitron	CHH	Hypomethylated in VC-RTL1
Chr2	12556800	12557000	AT2TE54860	TE	ATREP2	RC/Helitron	CHH	Hypomethylated in VC-RTL1
Chr2	13267700	13268900	AT2TE58200	TE	ATREP3	RC/Helitron	CHH	Hypomethylated in VC-RTL1
Chr2	13336200	13336400	AT2TE58530	TE	ATREP3	RC/Helitron	CHH	Hypomethylated in VC-RTL1
Chr2	13336900	13337400	AT2TE58530	TE	ATREP3	RC/Helitron	CHH	Hypomethylated in VC-RTL1
Chr2	13907300	13907800	AT2TE61325	TE	ATREP3	RC/Helitron	CHH	Hypomethylated in VC-RTL1
Chr2	14334800	14335200	AT2TE63435	TE	ATREP3	RC/Helitron	CHH	Hypomethylated in VC-RTL1
Chr2	16380500	16380700	AT2TE73500	TE	ATREP10D	RC/Helitron	CHH	Hypomethylated in VC-RTL1
Chr2	17147200	17147600	AT2TE77260	TE	ATREP1	RC/Helitron	CHH	Hypomethylated in VC-RTL1
Chr2	17147200	17147600	AT2TE77265	TE	ATREP2	RC/Helitron	CHH	Hypomethylated in VC-RTL1
Chr2	17904500	17904900	AT2TE81015	TE	ATREP11	RC/Helitron	CHH	Hypomethylated in VC-RTL1
Chr2	19195600	19195777	AT2TE87405	TE	ATREP11	RC/Helitron	CHH	Hypomethylated in VC-RTL1
Chr2	19195777	19195778	19195777-19195778	Intergenic	-	-	CHH	Hypomethylated in VC-RTL1
Chr2	19195778	19195900	AT2TE87410	TE	ATHATN7	DNA/HAT	CHH	Hypomethylated in VC-RTL1
Chr3	422900	423100	AT3TE01800	TE	ATREP1	RC/Helitron	CHH	Hypomethylated in VC-RTL1
Chr3	422900	423100	AT3TE01805	TE	ATREP2	RC/Helitron	CHH	Hypomethylated in VC-RTL1
Chr3	1969700	1970000	AT3G06435	Gene	protein_coding	-	CHH	Hypomethylated in VC-RTL1
Chr3	1969731	1970000	AT3TE08290	TE	RathE2_cons	RathE2_cons	CHH	Hypomethylated in VC-RTL1
Chr3	2629700	2630000	AT3TE11080	TE	ATREP3	RC/Helitron	CHH	Hypomethylated in VC-RTL1
Chr3	3686300	3686540	AT3TE15495	TE	ATHPOGON1	DNA/Pogo	CHH	Hypomethylated in VC-RTL1
Chr3	3686540	3686541	3686540-3686541	Intergenic	-	-	CHH	Hypomethylated in VC-RTL1
Chr3	3686541	3686600	AT3TE15500	TE	ATREP10D	RC/Helitron	CHH	Hypomethylated in VC-RTL1
Chr3	3716300	3716500	AT3TE15635	TE	ATREP3	RC/Helitron	CHH	Hypomethylated in VC-RTL1
Chr3	3965800	3966000	AT3TE16695	TE	ATREP3	RC/Helitron	CHH	Hypomethylated in VC-RTL1
Chr3	4288700	4288900	AT3TE18060	TE	HELITRON1	RC/Helitron	CHH	Hypomethylated in VC-RTL1
Chr3	5591400	5591600	AT3TE23485	TE	ATREP1	RC/Helitron	CHH	Hypomethylated in VC-RTL1
Chr3	5745500	5745900	AT3TE24145	TE	ATREP3	RC/Helitron	CHH	Hypomethylated in VC-RTL1
Chr3	5865900	5866400	AT3TE24685	TE	ATREP2	RC/Helitron	CHH	Hypomethylated in VC-RTL1
Chr3	6728900	6729300	AT3TE28255	TE	ATREP1	RC/Helitron	CHH	Hypomethylated in VC-RTL1
Chr3	7658900	7659300	AT3TE32175	TE	ATREP2A	RC/Helitron	CHH	Hypomethylated in VC-RTL1
Chr3	7850600	7850900	AT3TE32940	TE	ATREP15	RC/Helitron	CHH	Hypomethylated in VC-RTL1
Chr3	7980300	7980600	AT3TE33460	TE	ATREP2	RC/Helitron	CHH	Hypomethylated in VC-RTL1
Chr3	7995000	7995600	AT3TE33545	TE	ATREP3	RC/Helitron	CHH	Hypomethylated in VC-RTL1
Chr3	8093500	8093700	AT3TE33960	TE	ATDNAI26T9	DNA/MuDR	CHH	Hypomethylated in VC-RTL1
Chr3	8191600	8191800	8189358-8194679	Intergenic	-	-	CHH	Hypomethylated in VC-RTL1
Chr3	8231400	8231700	AT3TE34525	TE	HELITRONY3	RC/Helitron	CHH	Hypomethylated in VC-RTL1
Chr3	8329200	8329400	AT3TE34920	TE	ATREP3	RC/Helitron	CHH	Hypomethylated in VC-RTL1
Chr3	8329200	8329400	AT3TE34925	TE	ATREP1	RC/Helitron	CHH	Hypomethylated in VC-RTL1
Chr3	8596300	8596600	AT3TE36040	TE	ATREP1	RC/Helitron	CHH	Hypomethylated in VC-RTL1
Chr3	8875400	8875600	8875097-8876027	Intergenic	-	-	CHH	Hypomethylated in VC-RTL1
Chr3	9384100	9384300	AT3TE39205	TE	ATREP3	RC/Helitron	CHH	Hypomethylated in VC-RTL1
Chr3	9385100	9385300	AT3TE39205	TE	ATREP3	RC/Helitron	CHH	Hypomethylated in VC-RTL1
Chr3	9558600	9559600	AT3TE39890	TE	ATREP3	RC/Helitron	CHH	Hypomethylated in VC-RTL1
Chr3	9665200	9665500	AT3TE40295	TE	ATREP6	RC/Helitron	CHH	Hypomethylated in VC-RTL1
Chr3	10049100	10049500	AT3TE41835	TE	ATREP13	RC/Helitron	CHH	Hypomethylated in VC-RTL1
Chr3	10202400	10202600	AT3TE42410	TE	ATREP7	RC/Helitron	CHH	Hypomethylated in VC-RTL1
Chr3	10557100	10557300	AT3TE43880	TE	ATREP3	RC/Helitron	CHH	Hypomethylated in VC-RTL1
Chr3	10718000	10718200	AT3TE44540	TE	ATREP2	RC/Helitron	CHH	Hypomethylated in VC-RTL1
Chr3	10820700	10821000	AT3TE44975	TE	ATREP3	RC/Helitron	CHH	Hypomethylated in VC-RTL1
Chr3	10863000	10863200	AT3TE45170	TE	ATHATN7	DNA/HAT	CHH	Hypomethylated in VC-RTL1
Chr3	10900700	10900757	AT3TE45310	TE	ATREP10B	RC/Helitron	CHH	Hypomethylated in VC-RTL1
Chr3	10900757	10900763	10900757-10900763	Intergenic	-	-	CHH	Hypomethylated in VC-RTL1
Chr3	10900763	10900794	AT3TE45315	TE	ATREP1	RC/Helitron	CHH	Hypomethylated in VC-RTL1
Chr3	10900794	10900795	10900794-10900795	Intergenic	-	-	CHH	Hypomethylated in VC-RTL1
Chr3	10900795	10900842	AT3TE45320	TE	ATREP1	RC/Helitron	CHH	Hypomethylated in VC-RTL1
Chr3	10900842	10900843	10900842-10900843	Intergenic	-	-	CHH	Hypomethylated in VC-RTL1
Chr3	10900843	10901200	AT3TE45325	TE	ATREP1	RC/Helitron	CHH	Hypomethylated in VC-RTL1
Chr3	10908100	10908300	AT3TE45355	TE	HELITRON4	RC/Helitron	CHH	Hypomethylated in VC-RTL1
Chr3	10990200	10990700	10989921-10990980	Intergenic	-	-	CHH	Hypomethylated in VC-RTL1
Chr3	11202500	11202772	AT3TE46655	TE	ATREP4	RC/Helitron	CHH	Hypomethylated in VC-RTL1
Chr3	11202772	11202776	11202772-11202776	Intergenic	-	-	CHH	Hypomethylated in VC-RTL1
Chr3	11202776	11202800	AT3TE46660	TE	ATREP10D	RC/Helitron	CHH	Hypomethylated in VC-RTL1
Chr3	11205300	11205600	AT3TE46670	TE	ATGP1	LTR/Gypsy	CHH	Hypomethylated in VC-RTL1
Chr3	11378300	11378557	AT3TE47410	TE	ATGP1	LTR/Gypsy	CHH	Hypomethylated in VC-RTL1
Chr3	11378557	11378616	11378557-11378616	Intergenic	-	-	CHH	Hypomethylated in VC-RTL1
Chr3	11378616	11378746	AT3TE47415	TE	HELITRON2	RC/Helitron	CHH	Hypomethylated in VC-RTL1
Chr3	11378746	11378751	11378746-11378751	Intergenic	-	-	CHH	Hypomethylated in VC-RTL1
Chr3	11378751	11378800	AT3TE47420	TE	ATGP1	LTR/Gypsy	CHH	Hypomethylated in VC-RTL1
Chr3	11536400	11536600	AT3TE48060	TE	ATREP3	RC/Helitron	CHH	Hypomethylated in VC-RTL1
Chr3	11537100	11537400	AT3TE48060	TE	ATREP3	RC/Helitron	CHH	Hypomethylated in VC-RTL1
Chr3	11658500	11658700	AT3TE48455	TE	ATLINEIII	LINE/L1	CHH	Hypomethylated in VC-RTL1
Chr3	11658500	11658700	AT3TE48465	TE	VANDAL2N1	DNA/MuDR	CHH	Hypomethylated in VC-RTL1
Chr3	11703800	11703830	AT3TE48605	TE	ARNOLD3	DNA/MuDR	CHH	Hypomethylated in VC-RTL1
Chr3	11703830	11703833	11703830-11703833	Intergenic	-	-	CHH	Hypomethylated in VC-RTL1
Chr3	11703833	11704000	AT3TE48610	TE	HELITRONY1B	RC/Helitron	CHH	Hypomethylated in VC-RTL1
Chr3	11724000	11724200	AT3TE48825	TE	ATGP1	LTR/Gypsy	CHH	Hypomethylated in VC-RTL1
Chr3	11967800	11968000	AT3TE49835	TE	ATREP3	RC/Helitron	CHH	Hypomethylated in VC-RTL1
Chr3	12092500	12092995	AT3TE50300	TE	ARNOLD2	DNA/MuDR	CHH	Hypomethylated in VC-RTL1
Chr3	12092995	12092996	12092995-12092996	Intergenic	-	-	CHH	Hypomethylated in VC-RTL1
Chr3	12092996	12093000	AT3TE50305	TE	HELITRONY3	RC/Helitron	CHH	Hypomethylated in VC-RTL1
Chr3	12242700	12242734	12242206-12242734	Intergenic	-	-	CHH	Hypomethylated in VC-RTL1
Chr3	12242734	12242900	AT3TE50735	TE	ATDNAI27T9A	DNA/MuDR	CHH	Hypomethylated in VC-RTL1
Chr3	12256500	12256700	AT3TE50775	TE	ATGP1	LTR/Gypsy	CHH	Hypomethylated in VC-RTL1
Chr3	12660500	12660800	AT3TE52090	TE	ATREP5	RC/Helitron	CHH	Hypomethylated in VC-RTL1
Chr3	13185000	13185200	AT3TE53965	TE	ATGP1	LTR/Gypsy	CHH	Hypomethylated in VC-RTL1
Chr3	13262000	13262144	AT3TE54245	TE	ARNOLDY2	DNA/MuDR	CHH	Hypomethylated in VC-RTL1
Chr3	13262144	13262145	13262144-13262145	Intergenic	-	-	CHH	Hypomethylated in VC-RTL1
Chr3	13262145	13262300	AT3TE54250	TE	HELITRONY3	RC/Helitron	CHH	Hypomethylated in VC-RTL1
Chr3	13277500	13277700	13277155-13278842	Intergenic	-	-	CHH	Hypomethylated in VC-RTL1
Chr3	13848200	13848500	13848170-13849172	Intergenic	-	-	CHH	Hypomethylated in VC-RTL1
Chr3	14396900	14397100	AT3TE59040	TE	ARNOLDY2	DNA/MuDR	CHH	Hypomethylated in VC-RTL1
Chr3	14463900	14464100	AT3TE59290	TE	ATGP1	LTR/Gypsy	CHH	Hypomethylated in VC-RTL1
Chr3	14559200	14559207	AT3TE59630	TE	ATREP7	RC/Helitron	CHH	Hypomethylated in VC-RTL1
Chr3	14559207	14559400	14559207-14560277	Intergenic	-	-	CHH	Hypomethylated in VC-RTL1
Chr3	14563500	14563615	14563487-14563615	Intergenic	-	-	CHH	Hypomethylated in VC-RTL1
Chr3	14563615	14563700	AT3TE59655	TE	ATHILA4C	LTR/Gypsy	CHH	Hypomethylated in VC-RTL1
Chr3	14614800	14614841	AT3TE59835	TE	ATREP3	RC/Helitron	CHH	Hypomethylated in VC-RTL1
Chr3	14614841	14614842	14614841-14614842	Intergenic	-	-	CHH	Hypomethylated in VC-RTL1
Chr3	14614842	14614985	AT3TE59840	TE	RathE1_cons	RathE1_cons	CHH	Hypomethylated in VC-RTL1
Chr3	14614985	14615000	14614985-14615075	Intergenic	-	-	CHH	Hypomethylated in VC-RTL1
Chr3	14788900	14789300	AT3TE60425	TE	ATHILA3	LTR/Gypsy	CHH	Hypomethylated in VC-RTL1
Chr3	14939500	14939501	14938871-14939501	Intergenic	-	-	CHH	Hypomethylated in VC-RTL1
Chr3	14939501	14939686	AT3TE60930	TE	RathE1_cons	RathE1_cons	CHH	Hypomethylated in VC-RTL1
Chr3	14939686	14939700	14939686-14940114	Intergenic	-	-	CHH	Hypomethylated in VC-RTL1
Chr3	14957100	14957300	AT3TE61000	TE	META1	LTR/Copia	CHH	Hypomethylated in VC-RTL1
Chr3	14958100	14959200	AT3TE61000	TE	META1	LTR/Copia	CHH	Hypomethylated in VC-RTL1
Chr3	15168900	15169200	AT3TE61665	TE	TNAT1A	DNA	CHH	Hypomethylated in VC-RTL1
Chr3	15188300	15188900	AT3TE61725	TE	ATREP13	RC/Helitron	CHH	Hypomethylated in VC-RTL1
Chr3	15643000	15643300	AT3TE63260	TE	ATREP10D	RC/Helitron	CHH	Hypomethylated in VC-RTL1
Chr3	15651900	15652100	AT3TE63290	TE	VANDAL5A	DNA/MuDR	CHH	Hypomethylated in VC-RTL1
Chr3	15780200	15780400	AT3TE63805	TE	ATREP3	RC/Helitron	CHH	Hypomethylated in VC-RTL1
Chr3	15816400	15816900	AT3TE63950	TE	META1	LTR/Copia	CHH	Hypomethylated in VC-RTL1
Chr3	15938900	15939300	AT3TE64485	TE	ATREP3	RC/Helitron	CHH	Hypomethylated in VC-RTL1
Chr3	16064800	16065200	AT3TE65015	TE	META1	LTR/Copia	CHH	Hypomethylated in VC-RTL1
Chr3	16066100	16066500	AT3TE65015	TE	META1	LTR/Copia	CHH	Hypomethylated in VC-RTL1
Chr3	16099700	16099900	AT3TE65170	TE	HELITRONY1E	RC/Helitron	CHH	Hypomethylated in VC-RTL1
Chr3	16143100	16143300	AT3TE65360	TE	ARNOLDY2	DNA/MuDR	CHH	Hypomethylated in VC-RTL1
Chr3	16157900	16158100	AT3TE65460	TE	VANDAL1N1	DNA/MuDR	CHH	Hypomethylated in VC-RTL1
Chr3	16181900	16182004	AT3TE65535	TE	VANDAL20	DNA/MuDR	CHH	Hypomethylated in VC-RTL1
Chr3	16182004	16182243	16182004-16182243	Intergenic	-	-	CHH	Hypomethylated in VC-RTL1
Chr3	16182243	16182600	AT3TE65540	TE	HELITRONY1D	RC/Helitron	CHH	Hypomethylated in VC-RTL1
Chr3	16185600	16185900	16184168-16186089	Intergenic	-	-	CHH	Hypomethylated in VC-RTL1
Chr3	16405400	16405700	AT3TE66450	TE	ATREP2	RC/Helitron	CHH	Hypomethylated in VC-RTL1
Chr3	16417100	16417300	AT3TE66525	TE	ARNOLDY2	DNA/MuDR	CHH	Hypomethylated in VC-RTL1
Chr3	16420100	16420300	AT3TE66530	TE	ATREP3	RC/Helitron	CHH	Hypomethylated in VC-RTL1
Chr3	16451200	16451500	AT3TE66705	TE	ATREP3	RC/Helitron	CHH	Hypomethylated in VC-RTL1
Chr3	16485300	16485500	AT3TE66840	TE	ATREP2	RC/Helitron	CHH	Hypomethylated in VC-RTL1
Chr3	16556100	16556114	AT3TE67130	TE	TNAT1A	DNA	CHH	Hypomethylated in VC-RTL1
Chr3	16556114	16556115	16556114-16556115	Intergenic	-	-	CHH	Hypomethylated in VC-RTL1
Chr3	16556115	16556300	AT3TE67135	TE	TNAT1A	DNA	CHH	Hypomethylated in VC-RTL1
Chr3	16561800	16562000	AT3TE67160	TE	ATREP3	RC/Helitron	CHH	Hypomethylated in VC-RTL1
Chr3	16700000	16700160	AT3TE67660	TE	VANDAL20	DNA/MuDR	CHH	Hypomethylated in VC-RTL1
Chr3	16700160	16700200	16700160-16700465	Intergenic	-	-	CHH	Hypomethylated in VC-RTL1
Chr3	16726500	16726900	AT3TE67795	TE	HELITRONY3	RC/Helitron	CHH	Hypomethylated in VC-RTL1
Chr3	16852400	16852800	AT3TE68255	TE	ATREP4	RC/Helitron	CHH	Hypomethylated in VC-RTL1
Chr3	16879700	16880100	AT3TE68385	TE	ATREP3	RC/Helitron	CHH	Hypomethylated in VC-RTL1
Chr3	16902900	16903200	AT3G45990	Gene	protein_coding	-	CHH	Hypomethylated in VC-RTL1
Chr3	16902900	16903200	AT3TE68485	TE	ATREP1	RC/Helitron	CHH	Hypomethylated in VC-RTL1
Chr3	16939500	16939700	AT3G46120	Gene	protein_coding	-	CHH	Hypomethylated in VC-RTL1
Chr3	17061900	17062900	AT3TE69155	TE	ATREP3	RC/Helitron	CHH	Hypomethylated in VC-RTL1
Chr3	17070500	17070823	AT3TE69195	TE	ATREP5	RC/Helitron	CHH	Hypomethylated in VC-RTL1
Chr3	17070823	17070900	17070823-17071255	Intergenic	-	-	CHH	Hypomethylated in VC-RTL1
Chr3	17142500	17142700	AT3TE69470	TE	ATREP3	RC/Helitron	CHH	Hypomethylated in VC-RTL1
Chr3	17144100	17144300	AT3TE69475	TE	ATREP3	RC/Helitron	CHH	Hypomethylated in VC-RTL1
Chr3	17276800	17277400	AT3TE70035	TE	ATREP3	RC/Helitron	CHH	Hypomethylated in VC-RTL1
Chr3	17300800	17301000	AT3TE70130	TE	ATREP3	RC/Helitron	CHH	Hypomethylated in VC-RTL1
Chr3	17366400	17366800	AT3TE70410	TE	META1	LTR/Copia	CHH	Hypomethylated in VC-RTL1
Chr3	17367300	17367500	AT3TE70410	TE	META1	LTR/Copia	CHH	Hypomethylated in VC-RTL1
Chr3	17396000	17396011	AT3TE70540	TE	ATREP5	RC/Helitron	CHH	Hypomethylated in VC-RTL1
Chr3	17396011	17396012	17396011-17396012	Intergenic	-	-	CHH	Hypomethylated in VC-RTL1
Chr3	17396012	17396300	AT3TE70545	TE	HELITRONY1B	RC/Helitron	CHH	Hypomethylated in VC-RTL1
Chr3	17402500	17402550	AT3TE70580	TE	ATREP2	RC/Helitron	CHH	Hypomethylated in VC-RTL1
Chr3	17402550	17402567	17402550-17402567	Intergenic	-	-	CHH	Hypomethylated in VC-RTL1
Chr3	17402567	17402795	AT3TE70585	TE	ARNOLD3	DNA/MuDR	CHH	Hypomethylated in VC-RTL1
Chr3	17402795	17402796	17402795-17402796	Intergenic	-	-	CHH	Hypomethylated in VC-RTL1
Chr3	17402796	17402900	AT3TE70590	TE	ARNOLD3	DNA/MuDR	CHH	Hypomethylated in VC-RTL1
Chr3	17730100	17730500	AT3TE71820	TE	ATREP3	RC/Helitron	CHH	Hypomethylated in VC-RTL1
Chr3	17777200	17777400	AT3TE72005	TE	ATREP3	RC/Helitron	CHH	Hypomethylated in VC-RTL1
Chr3	18019600	18019800	AT3TE73025	TE	ATREP3	RC/Helitron	CHH	Hypomethylated in VC-RTL1
Chr3	18735200	18735400	AT3TE76010	TE	META1	LTR/Copia	CHH	Hypomethylated in VC-RTL1
Chr3	18746500	18746900	AT3TE76040	TE	ATREP3	RC/Helitron	CHH	Hypomethylated in VC-RTL1
Chr3	19437000	19437200	AT3TE78885	TE	ATREP2	RC/Helitron	CHH	Hypomethylated in VC-RTL1
Chr3	19520800	19521100	AT3TE79240	TE	ATREP2A	RC/Helitron	CHH	Hypomethylated in VC-RTL1
Chr3	19739800	19740100	AT3TE80165	TE	ATREP2	RC/Helitron	CHH	Hypomethylated in VC-RTL1
Chr3	20484800	20485000	AT3TE83280	TE	ATREP3	RC/Helitron	CHH	Hypomethylated in VC-RTL1
Chr3	20655200	20655500	AT3TE84000	TE	ARNOLDY2	DNA/MuDR	CHH	Hypomethylated in VC-RTL1
Chr3	20764400	20764600	20763161-20766735	Intergenic	-	-	CHH	Hypomethylated in VC-RTL1
Chr3	20788200	20788400	AT3TE84550	TE	ATREP3	RC/Helitron	CHH	Hypomethylated in VC-RTL1
Chr3	21109200	21109400	21104801-21109614	Intergenic	-	-	CHH	Hypomethylated in VC-RTL1
Chr3	21654700	21655200	AT3TE88185	TE	ATREP10D	RC/Helitron	CHH	Hypomethylated in VC-RTL1
Chr3	22064000	22064200	AT3TE89830	TE	ATCOPIA78	LTR/Copia	CHH	Hypomethylated in VC-RTL1
Chr3	22119600	22119800	AT3TE90045	TE	ATREP3	RC/Helitron	CHH	Hypomethylated in VC-RTL1
Chr3	22120100	22120300	AT3TE90045	TE	ATREP3	RC/Helitron	CHH	Hypomethylated in VC-RTL1
Chr4	79400	79600	AT4TE00380	TE	ATREP10B	RC/Helitron	CHH	Hypomethylated in VC-RTL1
Chr4	313600	313800	AT4TE01640	TE	ATREP3	RC/Helitron	CHH	Hypomethylated in VC-RTL1
Chr4	371500	371800	AT4TE01930	TE	ATREP3	RC/Helitron	CHH	Hypomethylated in VC-RTL1
Chr4	371500	371745	AT4TE01935	TE	ATREP3	RC/Helitron	CHH	Hypomethylated in VC-RTL1
Chr4	572300	572500	AT4TE02995	TE	VANDAL8	DNA/MuDR	CHH	Hypomethylated in VC-RTL1
Chr4	792300	792700	AT4TE04080	TE	ATREP11	RC/Helitron	CHH	Hypomethylated in VC-RTL1
Chr4	823800	824000	AT4TE04220	TE	ATREP2	RC/Helitron	CHH	Hypomethylated in VC-RTL1
Chr4	1001300	1002000	AT4TE05105	TE	ATREP3	RC/Helitron	CHH	Hypomethylated in VC-RTL1
Chr4	1091500	1091700	AT4TE05550	TE	LIMPET1	DNA/MuDR	CHH	Hypomethylated in VC-RTL1
Chr4	1100500	1100800	AT4TE05590	TE	ATREP1	RC/Helitron	CHH	Hypomethylated in VC-RTL1
Chr4	1521400	1521600	AT4TE07740	TE	ATREP2	RC/Helitron	CHH	Hypomethylated in VC-RTL1
Chr4	1644100	1644400	AT4TE08355	TE	ATGP1	LTR/Gypsy	CHH	Hypomethylated in VC-RTL1
Chr4	1742900	1743100	AT4TE08720	TE	ATHILA4A	LTR/Gypsy	CHH	Hypomethylated in VC-RTL1
Chr4	1956700	1956900	AT4TE09400	TE	ATREP11	RC/Helitron	CHH	Hypomethylated in VC-RTL1
Chr4	1958800	1959100	AT4TE09410	TE	TNAT2A	DNA	CHH	Hypomethylated in VC-RTL1
Chr4	1981900	1982100	AT4TE09480	TE	VANDAL20	DNA/MuDR	CHH	Hypomethylated in VC-RTL1
Chr4	2235700	2235900	AT4TE10450	TE	VANDAL2N1	DNA/MuDR	CHH	Hypomethylated in VC-RTL1
Chr4	2615200	2615400	AT4TE12235	TE	ATHPOGON1	DNA/Pogo	CHH	Hypomethylated in VC-RTL1
Chr4	2789700	2790000	AT4TE13055	TE	SIMPLEHAT2	DNA/HAT	CHH	Hypomethylated in VC-RTL1
Chr4	2789700	2789741	AT4G05508	Gene	miRNA	-	CHH	Hypomethylated in VC-RTL1
Chr4	3131800	3132000	AT4TE14435	TE	ARNOLDY1	DNA/MuDR	CHH	Hypomethylated in VC-RTL1
Chr4	3213900	3214400	3213790-3214449	Intergenic	-	-	CHH	Hypomethylated in VC-RTL1
Chr4	3897700	3897856	AT4TE17035	TE	ATREP2A	RC/Helitron	CHH	Hypomethylated in VC-RTL1
Chr4	3897856	3897857	3897856-3897857	Intergenic	-	-	CHH	Hypomethylated in VC-RTL1
Chr4	3897857	3898100	AT4TE17040	TE	ATREP3	RC/Helitron	CHH	Hypomethylated in VC-RTL1
Chr4	4109900	4110100	AT4TE17795	TE	HELITRONY3	RC/Helitron	CHH	Hypomethylated in VC-RTL1
Chr4	4147000	4147700	AT4TE17970	TE	HELITRON4	RC/Helitron	CHH	Hypomethylated in VC-RTL1
Chr4	4147000	4147700	AT4TE17975	TE	ATREP3	RC/Helitron	CHH	Hypomethylated in VC-RTL1
Chr4	4194300	4194500	AT4TE18080	TE	ATREP10D	RC/Helitron	CHH	Hypomethylated in VC-RTL1
Chr4	4645300	4645338	AT4G07825	Gene	protein_coding	-	CHH	Hypomethylated in VC-RTL1
Chr4	4645310	4645700	AT4TE19530	TE	ATGP1	LTR/Gypsy	CHH	Hypomethylated in VC-RTL1
Chr4	4875800	4876000	AT4TE20295	TE	ATREP10D	RC/Helitron	CHH	Hypomethylated in VC-RTL1
Chr4	4956600	4956800	AT4TE20730	TE	HELITRONY3	RC/Helitron	CHH	Hypomethylated in VC-RTL1
Chr4	5220400	5220600	AT4TE21735	TE	ATGP1	LTR/Gypsy	CHH	Hypomethylated in VC-RTL1
Chr4	5227400	5227439	AT4TE21765	TE	ATREP15	RC/Helitron	CHH	Hypomethylated in VC-RTL1
Chr4	5227439	5227440	5227439-5227440	Intergenic	-	-	CHH	Hypomethylated in VC-RTL1
Chr4	5227440	5227526	AT4TE21770	TE	ATREP4	RC/Helitron	CHH	Hypomethylated in VC-RTL1
Chr4	5227526	5227527	5227526-5227527	Intergenic	-	-	CHH	Hypomethylated in VC-RTL1
Chr4	5227527	5227800	AT4TE21775	TE	ATREP15	RC/Helitron	CHH	Hypomethylated in VC-RTL1
Chr4	5300900	5300909	5300215-5300909	Intergenic	-	-	CHH	Hypomethylated in VC-RTL1
Chr4	5300909	5301200	AT4TE22070	TE	ATSINE4	SINE	CHH	Hypomethylated in VC-RTL1
Chr4	5326900	5327300	AT4TE22180	TE	META1	LTR/Copia	CHH	Hypomethylated in VC-RTL1
Chr4	5392100	5392300	AT4TE22535	TE	HELITRONY3	RC/Helitron	CHH	Hypomethylated in VC-RTL1
Chr4	5393200	5393600	AT4TE22535	TE	HELITRONY3	RC/Helitron	CHH	Hypomethylated in VC-RTL1
Chr4	5415600	5415800	5414972-5416530	Intergenic	-	-	CHH	Hypomethylated in VC-RTL1
Chr4	5539800	5540600	AT4TE23180	TE	ATREP3	RC/Helitron	CHH	Hypomethylated in VC-RTL1
Chr4	5935500	5935700	AT4TE25010	TE	ARNOLDY2	DNA/MuDR	CHH	Hypomethylated in VC-RTL1
Chr4	6178900	6179010	AT4TE26155	TE	ATREP3	RC/Helitron	CHH	Hypomethylated in VC-RTL1
Chr4	6179010	6179011	6179010-6179011	Intergenic	-	-	CHH	Hypomethylated in VC-RTL1
Chr4	6179011	6179205	AT4TE26160	TE	ATHATN7	DNA/HAT	CHH	Hypomethylated in VC-RTL1
Chr4	6179205	6179241	6179205-6179241	Intergenic	-	-	CHH	Hypomethylated in VC-RTL1
Chr4	6179241	6179300	AT4TE26165	TE	ATREP11	RC/Helitron	CHH	Hypomethylated in VC-RTL1
Chr4	6243200	6243400	AT4TE26510	TE	ATREP1	RC/Helitron	CHH	Hypomethylated in VC-RTL1
Chr4	6357100	6357211	AT4TE27075	TE	ATREP10D	RC/Helitron	CHH	Hypomethylated in VC-RTL1
Chr4	6357100	6357400	AT4G10210	Gene	protein_coding	-	CHH	Hypomethylated in VC-RTL1
Chr4	6357355	6357400	AT4TE27080	TE	HELITRONY3	RC/Helitron	CHH	Hypomethylated in VC-RTL1
Chr4	6505900	6506200	AT4TE27790	TE	ATREP13	RC/Helitron	CHH	Hypomethylated in VC-RTL1
Chr4	6529300	6529314	AT4TE27910	TE	HELITRONY3	RC/Helitron	CHH	Hypomethylated in VC-RTL1
Chr4	6529314	6529315	6529314-6529315	Intergenic	-	-	CHH	Hypomethylated in VC-RTL1
Chr4	6529315	6529700	AT4TE27915	TE	ATGP1	LTR/Gypsy	CHH	Hypomethylated in VC-RTL1
Chr4	6532800	6533000	AT4TE27915	TE	ATGP1	LTR/Gypsy	CHH	Hypomethylated in VC-RTL1
Chr4	6537400	6537600	AT4TE27925	TE	ATREP11A	RC/Helitron	CHH	Hypomethylated in VC-RTL1
Chr4	7041000	7041600	AT4TE30490	TE	ATREP10D	RC/Helitron	CHH	Hypomethylated in VC-RTL1
Chr4	7178400	7178600	AT4TE31210	TE	BRODYAGA2	DNA/MuDR	CHH	Hypomethylated in VC-RTL1
Chr4	7230800	7231200	AT4TE31485	TE	ATREP1	RC/Helitron	CHH	Hypomethylated in VC-RTL1
Chr4	7360300	7360500	AT4TE32060	TE	META1	LTR/Copia	CHH	Hypomethylated in VC-RTL1
Chr4	7578600	7579200	AT4TE33100	TE	ARNOLDY2	DNA/MuDR	CHH	Hypomethylated in VC-RTL1
Chr4	7816900	7817300	AT4TE34305	TE	META1	LTR/Copia	CHH	Hypomethylated in VC-RTL1
Chr4	7905800	7906200	AT4TE34735	TE	ATREP8	RC/Helitron	CHH	Hypomethylated in VC-RTL1
Chr4	7905800	7906200	AT4TE34740	TE	ATREP2A	RC/Helitron	CHH	Hypomethylated in VC-RTL1
Chr4	8065100	8065600	AT4TE35580	TE	ATREP3	RC/Helitron	CHH	Hypomethylated in VC-RTL1
Chr4	8421600	8421900	AT4TE37370	TE	ATREP10D	RC/Helitron	CHH	Hypomethylated in VC-RTL1
Chr4	8564300	8564700	AT4TE38095	TE	ATREP11	RC/Helitron	CHH	Hypomethylated in VC-RTL1
Chr4	8728500	8729100	AT4TE38980	TE	ATREP3	RC/Helitron	CHH	Hypomethylated in VC-RTL1
Chr4	8802100	8802400	AT4TE39325	TE	ATREP3	RC/Helitron	CHH	Hypomethylated in VC-RTL1
Chr4	8899100	8899300	AT4TE39800	TE	ATREP1	RC/Helitron	CHH	Hypomethylated in VC-RTL1
Chr4	8947500	8947700	AT4TE40050	TE	ATREP2	RC/Helitron	CHH	Hypomethylated in VC-RTL1
Chr4	9111800	9112000	AT4TE40860	TE	ATREP2	RC/Helitron	CHH	Hypomethylated in VC-RTL1
Chr4	9189500	9189700	AT4TE41295	TE	ATREP11A	RC/Helitron	CHH	Hypomethylated in VC-RTL1
Chr4	9193100	9193300	AT4TE41320	TE	ATREP1	RC/Helitron	CHH	Hypomethylated in VC-RTL1
Chr4	9439100	9439500	AT4TE42635	TE	ATREP3	RC/Helitron	CHH	Hypomethylated in VC-RTL1
Chr4	9523100	9523300	AT4G16920	Gene	protein_coding	-	CHH	Hypomethylated in VC-RTL1
Chr4	9523100	9523300	AT4TE43010	TE	HELITRONY1A	RC/Helitron	CHH	Hypomethylated in VC-RTL1
Chr4	9571100	9571700	AT4TE43250	TE	META1	LTR/Copia	CHH	Hypomethylated in VC-RTL1
Chr4	9573900	9574400	AT4TE43250	TE	META1	LTR/Copia	CHH	Hypomethylated in VC-RTL1
Chr4	9842200	9842400	AT4TE44650	TE	ATREP3	RC/Helitron	CHH	Hypomethylated in VC-RTL1
Chr4	9912700	9913000	AT4TE44990	TE	META1	LTR/Copia	CHH	Hypomethylated in VC-RTL1
Chr4	9912000	9912400	AT4TE44990	TE	META1	LTR/Copia	CHH	Hypomethylated in VC-RTL1
Chr4	10900000	10900900	AT4TE49990	TE	META1	LTR/Copia	CHH	Hypomethylated in VC-RTL1
Chr4	10901200	10901500	AT4TE49990	TE	META1	LTR/Copia	CHH	Hypomethylated in VC-RTL1
Chr4	10903000	10903400	AT4TE49990	TE	META1	LTR/Copia	CHH	Hypomethylated in VC-RTL1
Chr4	11192500	11192800	AT4TE51405	TE	ATREP3	RC/Helitron	CHH	Hypomethylated in VC-RTL1
Chr4	11224200	11224400	AT4TE51575	TE	ATREP7	RC/Helitron	CHH	Hypomethylated in VC-RTL1
Chr4	11474900	11475100	11472981-11475719	Intergenic	-	-	CHH	Hypomethylated in VC-RTL1
Chr4	13124100	13124400	AT4TE61520	TE	ATREP1	RC/Helitron	CHH	Hypomethylated in VC-RTL1
Chr4	13124100	13124400	AT4TE61525	TE	ATREP2A	RC/Helitron	CHH	Hypomethylated in VC-RTL1
Chr4	13537300	13537669	AT4TE63695	TE	ATREP11A	RC/Helitron	CHH	Hypomethylated in VC-RTL1
Chr4	13537669	13537670	13537669-13537670	Intergenic	-	-	CHH	Hypomethylated in VC-RTL1
Chr4	13537670	13537800	AT4TE63700	TE	ATREP6	RC/Helitron	CHH	Hypomethylated in VC-RTL1
Chr4	14390400	14391017	AT4TE68040	TE	ATREP3	RC/Helitron	CHH	Hypomethylated in VC-RTL1
Chr4	14391017	14391018	14391017-14391018	Intergenic	-	-	CHH	Hypomethylated in VC-RTL1
Chr4	14391018	14391063	AT4TE68045	TE	ATREP10B	RC/Helitron	CHH	Hypomethylated in VC-RTL1
Chr4	14391063	14391064	14391063-14391064	Intergenic	-	-	CHH	Hypomethylated in VC-RTL1
Chr4	14391064	14391100	AT4TE68050	TE	ATREP15	RC/Helitron	CHH	Hypomethylated in VC-RTL1
Chr4	14457700	14458300	AT4TE68380	TE	ATREP2	RC/Helitron	CHH	Hypomethylated in VC-RTL1
Chr4	15816300	15816685	AT4TE75570	TE	ATREP13	RC/Helitron	CHH	Hypomethylated in VC-RTL1
Chr4	15816685	15816700	15816685-15816703	Intergenic	-	-	CHH	Hypomethylated in VC-RTL1
Chr4	16863300	16863500	AT4TE81120	TE	ATREP3	RC/Helitron	CHH	Hypomethylated in VC-RTL1
Chr4	16864400	16865100	AT4TE81120	TE	ATREP3	RC/Helitron	CHH	Hypomethylated in VC-RTL1
Chr4	17227500	17227800	17226610-17228081	Intergenic	-	-	CHH	Hypomethylated in VC-RTL1
Chr5	347300	347600	AT5TE01220	TE	ATREP10D	RC/Helitron	CHH	Hypomethylated in VC-RTL1
Chr5	355400	355700	AT5TE01260	TE	ATHATN7	DNA/HAT	CHH	Hypomethylated in VC-RTL1
Chr5	1067200	1067400	AT5TE03885	TE	VANDAL2N1	DNA/MuDR	CHH	Hypomethylated in VC-RTL1
Chr5	1896800	1897200	AT5TE06875	TE	ATREP3	RC/Helitron	CHH	Hypomethylated in VC-RTL1
Chr5	1897700	1898000	AT5TE06875	TE	ATREP3	RC/Helitron	CHH	Hypomethylated in VC-RTL1
Chr5	2188200	2188600	AT5TE07950	TE	ATREP5	RC/Helitron	CHH	Hypomethylated in VC-RTL1
Chr5	2603200	2603800	AT5TE09455	TE	ATREP5	RC/Helitron	CHH	Hypomethylated in VC-RTL1
Chr5	2604400	2604700	AT5TE09455	TE	ATREP5	RC/Helitron	CHH	Hypomethylated in VC-RTL1
Chr5	3019300	3019800	AT5TE10990	TE	ATREP3	RC/Helitron	CHH	Hypomethylated in VC-RTL1
Chr5	3566500	3566700	AT5TE12955	TE	ATREP2	RC/Helitron	CHH	Hypomethylated in VC-RTL1
Chr5	4141300	4141600	4138792-4142958	Intergenic	-	-	CHH	Hypomethylated in VC-RTL1
Chr5	4312500	4313300	AT5TE15610	TE	ATREP3	RC/Helitron	CHH	Hypomethylated in VC-RTL1
Chr5	4314500	4314700	AT5TE15610	TE	ATREP3	RC/Helitron	CHH	Hypomethylated in VC-RTL1
Chr5	4781600	4782000	AT5TE17300	TE	ATREP3	RC/Helitron	CHH	Hypomethylated in VC-RTL1
Chr5	6252500	6252700	6252042-6254560	Intergenic	-	-	CHH	Hypomethylated in VC-RTL1
Chr5	7352400	7352600	AT5TE26575	TE	ATREP10D	RC/Helitron	CHH	Hypomethylated in VC-RTL1
Chr5	7417400	7417700	AT5TE26820	TE	ATREP2	RC/Helitron	CHH	Hypomethylated in VC-RTL1
Chr5	7700900	7701200	AT5TE27840	TE	ATREP2	RC/Helitron	CHH	Hypomethylated in VC-RTL1
Chr5	8204900	8205100	AT5G24200	Gene	protein_coding	-	CHH	Hypomethylated in VC-RTL1
Chr5	8204900	8205100	AT5TE29670	TE	ATREP15	RC/Helitron	CHH	Hypomethylated in VC-RTL1
Chr5	8281200	8281400	AT5TE29935	TE	ATREP11	RC/Helitron	CHH	Hypomethylated in VC-RTL1
Chr5	8745200	8745500	AT5TE31640	TE	ATREP3	RC/Helitron	CHH	Hypomethylated in VC-RTL1
Chr5	8766400	8766700	AT5TE31735	TE	ATREP3	RC/Helitron	CHH	Hypomethylated in VC-RTL1
Chr5	8827400	8828100	AT5TE31945	TE	ARNOLDY1	DNA/MuDR	CHH	Hypomethylated in VC-RTL1
Chr5	8827400	8828100	AT5TE31950	TE	ARNOLDY2	DNA/MuDR	CHH	Hypomethylated in VC-RTL1
Chr5	9069700	9070000	AT5TE32810	TE	ATDNAI27T9A	DNA/MuDR	CHH	Hypomethylated in VC-RTL1
Chr5	9134400	9134600	AT5TE33035	TE	ATREP3	RC/Helitron	CHH	Hypomethylated in VC-RTL1
Chr5	9178100	9178500	AT5TE33220	TE	HELITRONY1B	RC/Helitron	CHH	Hypomethylated in VC-RTL1
Chr5	9363300	9363600	AT5TE33945	TE	ATREP6	RC/Helitron	CHH	Hypomethylated in VC-RTL1
Chr5	9381700	9381900	AT5TE34040	TE	META1	LTR/Copia	CHH	Hypomethylated in VC-RTL1
Chr5	9383300	9383700	AT5TE34040	TE	META1	LTR/Copia	CHH	Hypomethylated in VC-RTL1
Chr5	9385400	9385600	AT5TE34040	TE	META1	LTR/Copia	CHH	Hypomethylated in VC-RTL1
Chr5	9396200	9396400	AT5TE34100	TE	ARNOLDY2	DNA/MuDR	CHH	Hypomethylated in VC-RTL1
Chr5	9557900	9558300	AT5TE34715	TE	ATREP3	RC/Helitron	CHH	Hypomethylated in VC-RTL1
Chr5	9591700	9592100	AT5TE34810	TE	ATREP3	RC/Helitron	CHH	Hypomethylated in VC-RTL1
Chr5	9613100	9613500	AT5TE34865	TE	ATREP3	RC/Helitron	CHH	Hypomethylated in VC-RTL1
Chr5	9639800	9640100	AT5TE34965	TE	HELITRONY3	RC/Helitron	CHH	Hypomethylated in VC-RTL1
Chr5	9739300	9739500	AT5TE35360	TE	VANDAL2N1	DNA/MuDR	CHH	Hypomethylated in VC-RTL1
Chr5	9963100	9963500	AT5TE36260	TE	ATREP3	RC/Helitron	CHH	Hypomethylated in VC-RTL1
Chr5	9972500	9972700	9972299-9973454	Intergenic	-	-	CHH	Hypomethylated in VC-RTL1
Chr5	9993900	9994200	AT5TE36380	TE	ARNOLDY2	DNA/MuDR	CHH	Hypomethylated in VC-RTL1
Chr5	10041800	10041812	AT5TE36565	TE	ATREP2A	RC/Helitron	CHH	Hypomethylated in VC-RTL1
Chr5	10041812	10041813	10041812-10041813	Intergenic	-	-	CHH	Hypomethylated in VC-RTL1
Chr5	10041813	10042200	AT5TE36570	TE	ATREP2A	RC/Helitron	CHH	Hypomethylated in VC-RTL1
Chr5	10072200	10072230	AT5TE36695	TE	ATREP10D	RC/Helitron	CHH	Hypomethylated in VC-RTL1
Chr5	10072230	10072240	10072230-10072240	Intergenic	-	-	CHH	Hypomethylated in VC-RTL1
Chr5	10072240	10072400	AT5TE36700	TE	ATREP10C	RC/Helitron	CHH	Hypomethylated in VC-RTL1
Chr5	10404500	10405200	AT5TE37975	TE	META1	LTR/Copia	CHH	Hypomethylated in VC-RTL1
Chr5	10448700	10449000	AT5TE38075	TE	VANDAL1N1	DNA/MuDR	CHH	Hypomethylated in VC-RTL1
Chr5	10449400	10449491	AT5TE38075	TE	VANDAL1N1	DNA/MuDR	CHH	Hypomethylated in VC-RTL1
Chr5	10449491	10449492	10449491-10449492	Intergenic	-	-	CHH	Hypomethylated in VC-RTL1
Chr5	10449492	10449600	AT5TE38090	TE	BRODYAGA1	DNA/MuDR	CHH	Hypomethylated in VC-RTL1
Chr5	10764200	10764242	AT5TE39165	TE	ATCOPIA30	LTR/Copia	CHH	Hypomethylated in VC-RTL1
Chr5	10764242	10764243	10764242-10764243	Intergenic	-	-	CHH	Hypomethylated in VC-RTL1
Chr5	10771400	10771600	AT5TE39170	TE	ATGP1	LTR/Gypsy	CHH	Hypomethylated in VC-RTL1
Chr5	10764243	10764500	AT5TE39170	TE	ATGP1	LTR/Gypsy	CHH	Hypomethylated in VC-RTL1
Chr5	11721600	11721800	AT5TE42190	TE	ATHILA6B	LTR/Gypsy	CHH	Hypomethylated in VC-RTL1
Chr5	12316300	12316500	AT5TE43720	TE	ATHILA4B_LTR	LTR/Gypsy	CHH	Hypomethylated in VC-RTL1
Chr5	12508500	12508900	AT5TE44310	TE	ATGP1	LTR/Gypsy	CHH	Hypomethylated in VC-RTL1
Chr5	12719000	12719300	AT5TE45005	TE	ATHILA3	LTR/Gypsy	CHH	Hypomethylated in VC-RTL1
Chr5	12973900	12973923	AT5TE46170	TE	VANDAL20	DNA/MuDR	CHH	Hypomethylated in VC-RTL1
Chr5	12973923	12973924	12973923-12973924	Intergenic	-	-	CHH	Hypomethylated in VC-RTL1
Chr5	12973924	12974300	AT5TE46175	TE	VANDAL20	DNA/MuDR	CHH	Hypomethylated in VC-RTL1
Chr5	13231700	13231900	AT5TE47025	TE	ATREP2	RC/Helitron	CHH	Hypomethylated in VC-RTL1
Chr5	13583300	13583421	13583204-13583421	Intergenic	-	-	CHH	Hypomethylated in VC-RTL1
Chr5	13583421	13583500	AT5TE48260	TE	HELITRON2	RC/Helitron	CHH	Hypomethylated in VC-RTL1
Chr5	14004200	14004500	AT5TE49930	TE	ATREP5	RC/Helitron	CHH	Hypomethylated in VC-RTL1
Chr5	14081800	14082100	AT5TE50245	TE	ATREP3	RC/Helitron	CHH	Hypomethylated in VC-RTL1
Chr5	14153200	14153400	AT5TE50535	TE	ATREP4	RC/Helitron	CHH	Hypomethylated in VC-RTL1
Chr5	14153200	14153400	AT5TE50540	TE	SIMPLEHAT2	DNA/HAT	CHH	Hypomethylated in VC-RTL1
Chr5	14211500	14211700	AT5TE50790	TE	ATREP11	RC/Helitron	CHH	Hypomethylated in VC-RTL1
Chr5	14580500	14580900	AT5TE52405	TE	ARNOLDY2	DNA/MuDR	CHH	Hypomethylated in VC-RTL1
Chr5	14626300	14626500	AT5TE52645	TE	ARNOLDY2	DNA/MuDR	CHH	Hypomethylated in VC-RTL1
Chr5	14732300	14732800	AT5TE53090	TE	ATREP10A	RC/Helitron	CHH	Hypomethylated in VC-RTL1
Chr5	14847200	14847600	AT5TE53515	TE	ATREP5	RC/Helitron	CHH	Hypomethylated in VC-RTL1
Chr5	14880300	14880500	AT5TE53670	TE	ATREP2A	RC/Helitron	CHH	Hypomethylated in VC-RTL1
Chr5	14994700	14995067	AT5TE54085	TE	ATREP13	RC/Helitron	CHH	Hypomethylated in VC-RTL1
Chr5	14995067	14995068	14995067-14995068	Intergenic	-	-	CHH	Hypomethylated in VC-RTL1
Chr5	14995068	14995090	AT5TE54090	TE	ATREP10B	RC/Helitron	CHH	Hypomethylated in VC-RTL1
Chr5	14995090	14995091	14995090-14995091	Intergenic	-	-	CHH	Hypomethylated in VC-RTL1
Chr5	14995091	14995100	AT5TE54095	TE	ATREP17	DNA/MuDR	CHH	Hypomethylated in VC-RTL1
Chr5	15042200	15042400	AT5TE54310	TE	ATREP3	RC/Helitron	CHH	Hypomethylated in VC-RTL1
Chr5	15042200	15042400	AT5TE54320	TE	ATREP3	RC/Helitron	CHH	Hypomethylated in VC-RTL1
Chr5	15075500	15075800	AT5TE54450	TE	VANDAL1N1	DNA/MuDR	CHH	Hypomethylated in VC-RTL1
Chr5	15184400	15184582	AT5TE54925	TE	SIMPLEHAT2	DNA/HAT	CHH	Hypomethylated in VC-RTL1
Chr5	15184582	15184583	15184582-15184583	Intergenic	-	-	CHH	Hypomethylated in VC-RTL1
Chr5	15184583	15184600	AT5TE54930	TE	HELITRONY3	RC/Helitron	CHH	Hypomethylated in VC-RTL1
Chr5	15259300	15259489	15258877-15259489	Intergenic	-	-	CHH	Hypomethylated in VC-RTL1
Chr5	15259489	15259600	AT5TE55200	TE	HELITRONY1D	RC/Helitron	CHH	Hypomethylated in VC-RTL1
Chr5	15301400	15301800	AT5TE55375	TE	ATDNA2T9B	DNA/MuDR	CHH	Hypomethylated in VC-RTL1
Chr5	15341400	15341594	AT5TE55495	TE	ATHATN7	DNA/HAT	CHH	Hypomethylated in VC-RTL1
Chr5	15341594	15341595	15341594-15341595	Intergenic	-	-	CHH	Hypomethylated in VC-RTL1
Chr5	15341595	15342000	AT5TE55500	TE	ATREP3	RC/Helitron	CHH	Hypomethylated in VC-RTL1
Chr5	15361700	15362000	AT5TE55555	TE	ATHILA7	LTR/Gypsy	CHH	Hypomethylated in VC-RTL1
Chr5	15351500	15351900	AT5TE55555	TE	ATHILA7	LTR/Gypsy	CHH	Hypomethylated in VC-RTL1
Chr5	15386100	15386500	AT5TE55655	TE	ATREP5	RC/Helitron	CHH	Hypomethylated in VC-RTL1
Chr5	15387500	15387700	AT5TE55655	TE	ATREP5	RC/Helitron	CHH	Hypomethylated in VC-RTL1
Chr5	15576900	15577300	AT5TE56315	TE	ATREP3	RC/Helitron	CHH	Hypomethylated in VC-RTL1
Chr5	15717100	15717300	AT5TE56770	TE	ARNOLDY1	DNA/MuDR	CHH	Hypomethylated in VC-RTL1
Chr5	15779100	15779400	AT5TE56960	TE	ATREP11A	RC/Helitron	CHH	Hypomethylated in VC-RTL1
Chr5	15791000	15791106	AT5TE57000	TE	ATREP13	RC/Helitron	CHH	Hypomethylated in VC-RTL1
Chr5	15791106	15791107	15791106-15791107	Intergenic	-	-	CHH	Hypomethylated in VC-RTL1
Chr5	15791107	15791300	AT5TE57005	TE	ATREP13	RC/Helitron	CHH	Hypomethylated in VC-RTL1
Chr5	15856400	15856600	AT5TE57230	TE	ATLANTYS2	LTR/Gypsy	CHH	Hypomethylated in VC-RTL1
Chr5	16014100	16014300	AT5TE57805	TE	ARNOLDY2	DNA/MuDR	CHH	Hypomethylated in VC-RTL1
Chr5	16016800	16017200	AT5TE57830	TE	ATREP6	RC/Helitron	CHH	Hypomethylated in VC-RTL1
Chr5	16017500	16017749	AT5TE57830	TE	ATREP6	RC/Helitron	CHH	Hypomethylated in VC-RTL1
Chr5	16017749	16017750	16017749-16017750	Intergenic	-	-	CHH	Hypomethylated in VC-RTL1
Chr5	16017750	16017798	AT5TE57835	TE	ATREP9	RC/Helitron	CHH	Hypomethylated in VC-RTL1
Chr5	16017798	16017800	16017798-16018027	Intergenic	-	-	CHH	Hypomethylated in VC-RTL1
Chr5	16050700	16051000	AT5TE57960	TE	VANDAL2N1	DNA/MuDR	CHH	Hypomethylated in VC-RTL1
Chr5	16109700	16109900	AT5TE58190	TE	BRODYAGA1	DNA/MuDR	CHH	Hypomethylated in VC-RTL1
Chr5	16120900	16121100	AT5TE58250	TE	HELITRONY3	RC/Helitron	CHH	Hypomethylated in VC-RTL1
Chr5	16357200	16357700	AT5TE59075	TE	ATREP3	RC/Helitron	CHH	Hypomethylated in VC-RTL1
Chr5	16358200	16358400	AT5TE59075	TE	ATREP3	RC/Helitron	CHH	Hypomethylated in VC-RTL1
Chr5	17365100	17365500	AT5TE62740	TE	ATREP10D	RC/Helitron	CHH	Hypomethylated in VC-RTL1
Chr5	17365100	17365500	AT5TE62750	TE	ATREP3	RC/Helitron	CHH	Hypomethylated in VC-RTL1
Chr5	17481900	17482100	AT5TE63190	TE	ATREP1	RC/Helitron	CHH	Hypomethylated in VC-RTL1
Chr5	17796200	17796400	AT5TE64270	TE	ATREP3	RC/Helitron	CHH	Hypomethylated in VC-RTL1
Chr5	17851800	17852000	AT5TE64455	TE	VANDAL2N1	DNA/MuDR	CHH	Hypomethylated in VC-RTL1
Chr5	17901200	17901500	AT5TE64600	TE	VANDAL6	DNA/MuDR	CHH	Hypomethylated in VC-RTL1
Chr5	18554400	18554600	AT5TE66775	TE	ATREP10	RC/Helitron	CHH	Hypomethylated in VC-RTL1
Chr5	18555700	18555900	AT5TE66785	TE	ATREP9	RC/Helitron	CHH	Hypomethylated in VC-RTL1
Chr5	18669300	18669700	AT5TE67215	TE	ATDNAI27T9A	DNA/MuDR	CHH	Hypomethylated in VC-RTL1
Chr5	18854700	18855500	AT5TE67885	TE	ATREP3	RC/Helitron	CHH	Hypomethylated in VC-RTL1
Chr5	18919600	18919900	AT5TE68105	TE	ATREP13	RC/Helitron	CHH	Hypomethylated in VC-RTL1
Chr5	19101600	19101900	AT5TE68695	TE	ATREP2	RC/Helitron	CHH	Hypomethylated in VC-RTL1
Chr5	19413200	19413400	AT5TE69840	TE	ATREP11A	RC/Helitron	CHH	Hypomethylated in VC-RTL1
Chr5	19671100	19671600	AT5TE70785	TE	ATREP3	RC/Helitron	CHH	Hypomethylated in VC-RTL1
Chr5	19741500	19742300	AT5TE71030	TE	ATREP3	RC/Helitron	CHH	Hypomethylated in VC-RTL1
Chr5	19952300	19952500	19951687-19953487	Intergenic	-	-	CHH	Hypomethylated in VC-RTL1
Chr5	20681300	20682000	AT5TE74510	TE	ATREP3	RC/Helitron	CHH	Hypomethylated in VC-RTL1
Chr5	21815300	21815390	21814908-21815390	Intergenic	-	-	CHH	Hypomethylated in VC-RTL1
Chr5	21815390	21815500	AT5TE78580	TE	ATCOPIA13	LTR/Copia	CHH	Hypomethylated in VC-RTL1
Chr5	22231400	22231700	AT5TE80015	TE	ATREP3	RC/Helitron	CHH	Hypomethylated in VC-RTL1
Chr5	22463800	22464157	AT5TE80860	TE	ATREP2A	RC/Helitron	CHH	Hypomethylated in VC-RTL1
Chr5	22464157	22464158	22464157-22464158	Intergenic	-	-	CHH	Hypomethylated in VC-RTL1
Chr5	22464158	22464200	AT5TE80865	TE	ATREP2A	RC/Helitron	CHH	Hypomethylated in VC-RTL1
Chr5	23026200	23026500	AT5TE82825	TE	ATREP10D	RC/Helitron	CHH	Hypomethylated in VC-RTL1
Chr5	24186300	24186600	AT5TE87010	TE	ATREP3	RC/Helitron	CHH	Hypomethylated in VC-RTL1
Chr5	24436200	24436400	AT5TE87925	TE	ATREP10	RC/Helitron	CHH	Hypomethylated in VC-RTL1
Chr5	24448900	24449100	AT5TE87975	TE	ATREP1	RC/Helitron	CHH	Hypomethylated in VC-RTL1
Chr5	24448900	24449100	AT5TE87980	TE	ATREP2	RC/Helitron	CHH	Hypomethylated in VC-RTL1
Chr5	24475900	24476300	AT5TE88075	TE	ATREP3	RC/Helitron	CHH	Hypomethylated in VC-RTL1
Chr5	25265000	25265300	AT5TE90875	TE	ATREP3	RC/Helitron	CHH	Hypomethylated in VC-RTL1
Chr5	25824100	25824260	25823201-25824260	Intergenic	-	-	CHH	Hypomethylated in VC-RTL1
Chr5	25824260	25824400	AT5TE92940	TE	ATREP4	RC/Helitron	CHH	Hypomethylated in VC-RTL1
Chr5	26787400	26787600	AT5TE96490	TE	ATREP2	RC/Helitron	CHH	Hypomethylated in VC-RTL1
Chr1	17100	17400	AT1TE00025	TE	ATREP3	RC/Helitron	CHH	Hypermethylated in VC-RTL1
Chr1	1184900	1184970	1183704-1184970	Intergenic	-	-	CHH	Hypermethylated in VC-RTL1
Chr1	1184970	1185100	AT1TE03860	TE	ATHPOGON1	DNA/Pogo	CHH	Hypermethylated in VC-RTL1
Chr1	5657700	5657736	AT1TE18285	TE	ATREP13	RC/Helitron	CHH	Hypermethylated in VC-RTL1
Chr1	5657736	5657737	5657736-5657737	Intergenic	-	-	CHH	Hypermethylated in VC-RTL1
Chr1	5657737	5657944	AT1TE18290	TE	ATREP10B	RC/Helitron	CHH	Hypermethylated in VC-RTL1
Chr1	5657944	5657945	5657944-5657945	Intergenic	-	-	CHH	Hypermethylated in VC-RTL1
Chr1	5657945	5658000	AT1TE18295	TE	ATREP10B	RC/Helitron	CHH	Hypermethylated in VC-RTL1
Chr1	7227900	7227970	7227566-7227970	Intergenic	-	-	CHH	Hypermethylated in VC-RTL1
Chr1	7227970	7228100	AT1TE23355	TE	ATREP2	RC/Helitron	CHH	Hypermethylated in VC-RTL1
Chr1	13075800	13076000	AT1TE42700	TE	ATREP15	RC/Helitron	CHH	Hypermethylated in VC-RTL1
Chr1	15189900	15190100	AT1TE49850	TE	ATHILA2	LTR/Gypsy	CHH	Hypermethylated in VC-RTL1
Chr1	17092000	17092200	17091464-17093643	Intergenic	-	-	CHH	Hypermethylated in VC-RTL1
Chr2	709500	709900	AT2TE03055	TE	ATREP3	RC/Helitron	CHH	Hypermethylated in VC-RTL1
Chr2	8755000	8755200	8754480-8755925	Intergenic	-	-	CHH	Hypermethylated in VC-RTL1
Chr2	8911300	8911500	8910535-8911860	Intergenic	-	-	CHH	Hypermethylated in VC-RTL1
Chr2	9692600	9692783	AT2TE41350	TE	ARNOLD2	DNA/MuDR	CHH	Hypermethylated in VC-RTL1
Chr2	9692783	9692900	9692783-9694686	Intergenic	-	-	CHH	Hypermethylated in VC-RTL1
Chr3	3080100	3080300	AT3TE12935	TE	ATREP2	RC/Helitron	CHH	Hypermethylated in VC-RTL1
Chr3	16205000	16205200	AT3TE65635	TE	ARNOLDY1	DNA/MuDR	CHH	Hypermethylated in VC-RTL1
Chr3	16880400	16880600	AT3TE68385	TE	ATREP3	RC/Helitron	CHH	Hypermethylated in VC-RTL1
Chr3	17311100	17311300	AT3TE70170	TE	ATREP10D	RC/Helitron	CHH	Hypermethylated in VC-RTL1
Chr4	764200	764400	AT4TE03920	TE	ATREP10B	RC/Helitron	CHH	Hypermethylated in VC-RTL1
Chr4	1090800	1090973	AT4TE05545	TE	ATDNAI27T9A	DNA/MuDR	CHH	Hypermethylated in VC-RTL1
Chr4	1090973	1091000	1090973-1091113	Intergenic	-	-	CHH	Hypermethylated in VC-RTL1
Chr4	1438700	1438900	1436200-1440146	Intergenic	-	-	CHH	Hypermethylated in VC-RTL1
Chr4	5892700	5892900	AT4TE24820	TE	ATLANTYS2	LTR/Gypsy	CHH	Hypermethylated in VC-RTL1
Chr4	9910100	9910400	AT4TE44990	TE	META1	LTR/Copia	CHH	Hypermethylated in VC-RTL1
Chr5	10197500	10197700	AT5TE37160	TE	HELITRONY3	RC/Helitron	CHH	Hypermethylated in VC-RTL1
Chr5	11026100	11026400	AT5TE40040	TE	ATREP3	RC/Helitron	CHH	Hypermethylated in VC-RTL1
Chr5	13918000	13918300	AT5TE49620	TE	ATREP3	RC/Helitron	CHH	Hypermethylated in VC-RTL1
Chr5	20295000	20295007	AT5TE73085	TE	RP1_AT	DNA	CHH	Hypermethylated in VC-RTL1
Chr5	20295007	20295008	20295007-20295008	Intergenic	-	-	CHH	Hypermethylated in VC-RTL1
Chr5	20295008	20295238	AT5TE73090	TE	RP1_AT	DNA	CHH	Hypermethylated in VC-RTL1
Chr5	20295238	20295300	20295238-20295648	Intergenic	-	-	CHH	Hypermethylated in VC-RTL1

## Sheet: WT Col-0 vs SC-RTL1
Differentially methylated regions (WT Col-0 vs VC-RTL1)
chr	start	end	Id	type	family	superfamily	context	DMR
Chr1	12843700	12844100	AT1TE41800	TE	ATCOPIA36	LTR/Copia	CG	Hypomethylated in SC-RTL1
Chr1	13604600	13604900	13603144-13606762	Intergenic	-	-	CG	Hypomethylated in SC-RTL1
Chr1	25103400	25103700	AT1G67140	Gene	protein_coding	-	CG	Hypomethylated in SC-RTL1
Chr1	29751200	29751400	AT1G79090	Gene	protein_coding	-	CG	Hypomethylated in SC-RTL1
Chr2	2939300	2939600	2938180-2940091	Intergenic	-	-	CG	Hypomethylated in SC-RTL1
Chr2	7860900	7861064	7859715-7861064	Intergenic	-	-	CG	Hypomethylated in SC-RTL1
Chr2	7861064	7861100	AT2TE32530	TE	HELITRONY1D	RC/Helitron	CG	Hypomethylated in SC-RTL1
Chr3	15354300	15354500	AT3TE62370	TE	HELITRONY1E	RC/Helitron	CG	Hypomethylated in SC-RTL1
Chr5	10265600	10265800	AT5TE37455	TE	ATENSPM9	DNA/En-Spm	CG	Hypomethylated in SC-RTL1
Chr5	15599500	15599609	15597885-15599609	Intergenic	-	-	CG	Hypomethylated in SC-RTL1
Chr5	15599609	15599700	AT5TE56410	TE	ATCOPIA75	LTR/Copia	CG	Hypomethylated in SC-RTL1
Chr5	15742200	15742400	15741626-15742762	Intergenic	-	-	CG	Hypomethylated in SC-RTL1
Chr5	15883400	15883600	AT5G39670	Gene	protein_coding	-	CG	Hypomethylated in SC-RTL1
Chr5	18780200	18780205	AT5G46295	Gene	protein_coding	-	CG	Hypomethylated in SC-RTL1
Chr5	18780205	18780400	18780205-18781875	Intergenic	-	-	CG	Hypomethylated in SC-RTL1
Chr1	13259000	13259027	13258583-13259027	Intergenic	-	-	CG	Hypermethylated in SC-RTL1
Chr1	13259027	13259196	AT1TE43335	TE	VANDAL20	DNA/MuDR	CG	Hypermethylated in SC-RTL1
Chr1	13259196	13259200	13259196-13260166	Intergenic	-	-	CG	Hypermethylated in SC-RTL1
Chr1	16670000	16670400	16669534-16672582	Intergenic	-	-	CG	Hypermethylated in SC-RTL1
Chr3	3527100	3527300	3524538-3527575	Intergenic	-	-	CG	Hypermethylated in SC-RTL1
Chr3	9707000	9707300	9706161-9707800	Intergenic	-	-	CG	Hypermethylated in SC-RTL1
Chr5	14715100	14715300	14714629-14715653	Intergenic	-	-	CG	Hypermethylated in SC-RTL1
Chr5	15112200	15112259	AT5TE54645	TE	ATMUNX1	DNA/MuDR	CG	Hypermethylated in SC-RTL1
Chr5	15112259	15112400	15112259-15113468	Intergenic	-	-	CG	Hypermethylated in SC-RTL1
Chr5	22705900	22706200	22704892-22708679	Intergenic	-	-	CG	Hypermethylated in SC-RTL1
Chr2	10658200	10658400	AT2G25050	Gene	protein_coding	-	CHG	Hypomethylated in SC-RTL1
Chr2	10658800	10659100	AT2G25050	Gene	protein_coding	-	CHG	Hypomethylated in SC-RTL1
Chr3	12570600	12570760	AT3TE51760	TE	VANDAL17	DNA/MuDR	CHG	Hypomethylated in SC-RTL1
Chr3	12570760	12570800	12570760-12572115	Intergenic	-	-	CHG	Hypomethylated in SC-RTL1
Chr3	18630200	18630600	AT3TE75575	TE	ATDNA2T9A	DNA/MuDR	CHG	Hypomethylated in SC-RTL1
Chr3	18630200	18630478	AT3G50250	Gene	protein_coding	-	CHG	Hypomethylated in SC-RTL1
Chr5	10630600	10630800	10630018-10630921	Intergenic	-	-	CHG	Hypomethylated in SC-RTL1
Chr5	19364500	19364700	19363928-19365287	Intergenic	-	-	CHG	Hypomethylated in SC-RTL1
Chr5	20856000	20856200	AT5TE75120	TE	SIMPLEGUY1	DNA/Harbinger	CHG	Hypomethylated in SC-RTL1
Chr2	3388800	3389000	3388493-3391792	Intergenic	-	-	CHG	Hypermethylated in SC-RTL1
Chr4	5987500	5988200	AT4TE25200	TE	ATCOPIA51	LTR/Copia	CHG	Hypermethylated in SC-RTL1
Chr4	10542000	10542200	AT4TE48215	TE	VANDAL5	DNA/MuDR	CHG	Hypermethylated in SC-RTL1
Chr1	2234400	2234600	AT1TE07300	TE	ATREP3	RC/Helitron	CHH	Hypomethylated in SC-RTL1
Chr1	3762500	3762700	AT1TE12230	TE	HELITRONY1E	RC/Helitron	CHH	Hypomethylated in SC-RTL1
Chr1	6514900	6515100	AT1TE21130	TE	ATREP1	RC/Helitron	CHH	Hypomethylated in SC-RTL1
Chr1	9126700	9126900	AT1TE29390	TE	HELITRONY3	RC/Helitron	CHH	Hypomethylated in SC-RTL1
Chr1	9126737	9126900	AT1G26380	Gene	protein_coding	-	CHH	Hypomethylated in SC-RTL1
Chr1	10597800	10598100	AT1TE34295	TE	HELITRONY3	RC/Helitron	CHH	Hypomethylated in SC-RTL1
Chr1	10597800	10598100	AT1TE34300	TE	ATREP13	RC/Helitron	CHH	Hypomethylated in SC-RTL1
Chr1	11522100	11522300	AT1TE37275	TE	ATREP11	RC/Helitron	CHH	Hypomethylated in SC-RTL1
Chr1	11699800	11700100	AT1TE37890	TE	ATREP3	RC/Helitron	CHH	Hypomethylated in SC-RTL1
Chr1	11701400	11701700	AT1TE37890	TE	ATREP3	RC/Helitron	CHH	Hypomethylated in SC-RTL1
Chr1	13567500	13567700	AT1TE44395	TE	ARNOLDY2	DNA/MuDR	CHH	Hypomethylated in SC-RTL1
Chr1	14726600	14726800	14717861-14746646	Intergenic	-	-	CHH	Hypomethylated in SC-RTL1
Chr1	15610400	15610518	15609514-15610518	Intergenic	-	-	CHH	Hypomethylated in SC-RTL1
Chr1	15610518	15610600	AT1TE51355	TE	META1	LTR/Copia	CHH	Hypomethylated in SC-RTL1
Chr1	16013400	16013600	AT1TE52795	TE	ATGP1	LTR/Gypsy	CHH	Hypomethylated in SC-RTL1
Chr1	18791100	18791300	AT1TE62285	TE	ATREP3	RC/Helitron	CHH	Hypomethylated in SC-RTL1
Chr1	19026900	19027300	AT1TE63030	TE	HELITRONY3	RC/Helitron	CHH	Hypomethylated in SC-RTL1
Chr1	19063000	19063400	AT1TE63170	TE	ATREP3	RC/Helitron	CHH	Hypomethylated in SC-RTL1
Chr1	19716300	19716393	19714878-19716393	Intergenic	-	-	CHH	Hypomethylated in SC-RTL1
Chr1	19716393	19716455	AT1TE65155	TE	HELITRONY1E	RC/Helitron	CHH	Hypomethylated in SC-RTL1
Chr1	19716402	19716500	AT1G52940	Gene	protein_coding	-	CHH	Hypomethylated in SC-RTL1
Chr1	19716456	19716500	AT1TE65160	TE	ATREP10D	RC/Helitron	CHH	Hypomethylated in SC-RTL1
Chr1	21054400	21054700	21053617-21056232	Intergenic	-	-	CHH	Hypomethylated in SC-RTL1
Chr1	21740500	21740552	AT1TE71725	TE	HELITRONY3	RC/Helitron	CHH	Hypomethylated in SC-RTL1
Chr1	21740552	21740553	21740552-21740553	Intergenic	-	-	CHH	Hypomethylated in SC-RTL1
Chr1	21740553	21740591	AT1TE71730	TE	HELITRONY3	RC/Helitron	CHH	Hypomethylated in SC-RTL1
Chr1	21740591	21740592	21740591-21740592	Intergenic	-	-	CHH	Hypomethylated in SC-RTL1
Chr1	21740592	21740634	AT1TE71735	TE	ATREP5	RC/Helitron	CHH	Hypomethylated in SC-RTL1
Chr1	21740634	21740700	21740634-21741593	Intergenic	-	-	CHH	Hypomethylated in SC-RTL1
Chr1	22993600	22993800	AT1TE75780	TE	ATREP3	RC/Helitron	CHH	Hypomethylated in SC-RTL1
Chr1	23215000	23215200	AT1TE76530	TE	ATREP3	RC/Helitron	CHH	Hypomethylated in SC-RTL1
Chr1	23424100	23424300	AT1TE77135	TE	ATMUN1	DNA/MuDR	CHH	Hypomethylated in SC-RTL1
Chr1	24564400	24564700	AT1G65985	Gene	protein_coding	-	CHH	Hypomethylated in SC-RTL1
Chr1	24564400	24564700	AT1TE80685	TE	HELITRONY1A	RC/Helitron	CHH	Hypomethylated in SC-RTL1
Chr1	25098500	25098800	AT1TE82410	TE	HELITRONY3	RC/Helitron	CHH	Hypomethylated in SC-RTL1
Chr1	30252300	30252500	AT1TE98910	TE	ATREP3	RC/Helitron	CHH	Hypomethylated in SC-RTL1
Chr2	257600	257800	257550-262038	Intergenic	-	-	CHH	Hypomethylated in SC-RTL1
Chr2	395700	395900	AT2TE01630	TE	ATREP3	RC/Helitron	CHH	Hypomethylated in SC-RTL1
Chr2	500100	500400	AT2TE02160	TE	ATREP3	RC/Helitron	CHH	Hypomethylated in SC-RTL1
Chr2	1546300	1546500	AT2TE07125	TE	SIMPLEHAT2	DNA/HAT	CHH	Hypomethylated in SC-RTL1
Chr2	1586600	1586800	1585622-1587376	Intergenic	-	-	CHH	Hypomethylated in SC-RTL1
Chr2	1947800	1948000	AT2TE08970	TE	ATREP7	RC/Helitron	CHH	Hypomethylated in SC-RTL1
Chr2	5231100	5231400	AT2TE21360	TE	ATGP1	LTR/Gypsy	CHH	Hypomethylated in SC-RTL1
Chr2	5807400	5807651	AT2TE23655	TE	HELITRONY3	RC/Helitron	CHH	Hypomethylated in SC-RTL1
Chr2	5807651	5807652	5807651-5807652	Intergenic	-	-	CHH	Hypomethylated in SC-RTL1
Chr2	5807652	5807800	AT2TE23660	TE	ATGP1	LTR/Gypsy	CHH	Hypomethylated in SC-RTL1
Chr2	6185200	6185400	6184648-6187175	Intergenic	-	-	CHH	Hypomethylated in SC-RTL1
Chr2	6914500	6914586	AT2TE28160	TE	ATCOPIA38	LTR/Copia	CHH	Hypomethylated in SC-RTL1
Chr2	6914586	6914700	6914586-6918039	Intergenic	-	-	CHH	Hypomethylated in SC-RTL1
Chr2	10468300	10468500	AT2TE44915	TE	ATREP3	RC/Helitron	CHH	Hypomethylated in SC-RTL1
Chr2	10468340	10468500	AT2G24625	Gene	protein_coding	-	CHH	Hypomethylated in SC-RTL1
Chr2	12877100	12877500	AT2TE56340	TE	ATREP4	RC/Helitron	CHH	Hypomethylated in SC-RTL1
Chr2	14334800	14335200	AT2TE63435	TE	ATREP3	RC/Helitron	CHH	Hypomethylated in SC-RTL1
Chr2	16423100	16423300	16421852-16423639	Intergenic	-	-	CHH	Hypomethylated in SC-RTL1
Chr2	16876600	16876900	AT2TE75960	TE	HELITRONY3	RC/Helitron	CHH	Hypomethylated in SC-RTL1
Chr3	1964400	1964439	AT3TE08270	TE	RathE2_cons	RathE2_cons	CHH	Hypomethylated in SC-RTL1
Chr3	1964439	1964800	1964439-1969121	Intergenic	-	-	CHH	Hypomethylated in SC-RTL1
Chr3	2998300	2998600	2998190-3000759	Intergenic	-	-	CHH	Hypomethylated in SC-RTL1
Chr3	3686300	3686540	AT3TE15495	TE	ATHPOGON1	DNA/Pogo	CHH	Hypomethylated in SC-RTL1
Chr3	3686540	3686541	3686540-3686541	Intergenic	-	-	CHH	Hypomethylated in SC-RTL1
Chr3	3686541	3686600	AT3TE15500	TE	ATREP10D	RC/Helitron	CHH	Hypomethylated in SC-RTL1
Chr3	3965800	3966000	AT3TE16695	TE	ATREP3	RC/Helitron	CHH	Hypomethylated in SC-RTL1
Chr3	4288600	4288900	AT3TE18060	TE	HELITRON1	RC/Helitron	CHH	Hypomethylated in SC-RTL1
Chr3	8596500	8596800	AT3TE36040	TE	ATREP1	RC/Helitron	CHH	Hypomethylated in SC-RTL1
Chr3	9385100	9385300	AT3TE39205	TE	ATREP3	RC/Helitron	CHH	Hypomethylated in SC-RTL1
Chr3	9739700	9739900	AT3TE40545	TE	BRODYAGA2	DNA/MuDR	CHH	Hypomethylated in SC-RTL1
Chr3	9890300	9890900	AT3TE41165	TE	ATREP3	RC/Helitron	CHH	Hypomethylated in SC-RTL1
Chr3	10820700	10821100	AT3TE44975	TE	ATREP3	RC/Helitron	CHH	Hypomethylated in SC-RTL1
Chr3	10863600	10863667	AT3TE45175	TE	ARNOLDY2	DNA/MuDR	CHH	Hypomethylated in SC-RTL1
Chr3	10863667	10863668	10863667-10863668	Intergenic	-	-	CHH	Hypomethylated in SC-RTL1
Chr3	10863668	10863800	AT3TE45180	TE	ARNOLDY1	DNA/MuDR	CHH	Hypomethylated in SC-RTL1
Chr3	11205200	11205600	AT3TE46670	TE	ATGP1	LTR/Gypsy	CHH	Hypomethylated in SC-RTL1
Chr3	11329200	11329500	AT3TE47230	TE	ATGP1	LTR/Gypsy	CHH	Hypomethylated in SC-RTL1
Chr3	11703800	11703830	AT3TE48605	TE	ARNOLD3	DNA/MuDR	CHH	Hypomethylated in SC-RTL1
Chr3	11703830	11703833	11703830-11703833	Intergenic	-	-	CHH	Hypomethylated in SC-RTL1
Chr3	11703833	11704000	AT3TE48610	TE	HELITRONY1B	RC/Helitron	CHH	Hypomethylated in SC-RTL1
Chr3	12092800	12092995	AT3TE50300	TE	ARNOLD2	DNA/MuDR	CHH	Hypomethylated in SC-RTL1
Chr3	12092995	12092996	12092995-12092996	Intergenic	-	-	CHH	Hypomethylated in SC-RTL1
Chr3	12092996	12093000	AT3TE50305	TE	HELITRONY3	RC/Helitron	CHH	Hypomethylated in SC-RTL1
Chr3	13475800	13476000	AT3TE54855	TE	ARNOLDY2	DNA/MuDR	CHH	Hypomethylated in SC-RTL1
Chr3	15780200	15780400	AT3TE63805	TE	ATREP3	RC/Helitron	CHH	Hypomethylated in SC-RTL1
Chr3	15816600	15816900	AT3TE63950	TE	META1	LTR/Copia	CHH	Hypomethylated in SC-RTL1
Chr3	16061500	16061700	AT3TE65005	TE	HELITRONY1E	RC/Helitron	CHH	Hypomethylated in SC-RTL1
Chr3	16061500	16061700	AT3TE65010	TE	HELITRONY1E	RC/Helitron	CHH	Hypomethylated in SC-RTL1
Chr3	16143100	16143300	AT3TE65360	TE	ARNOLDY2	DNA/MuDR	CHH	Hypomethylated in SC-RTL1
Chr3	16405400	16405600	AT3TE66450	TE	ATREP2	RC/Helitron	CHH	Hypomethylated in SC-RTL1
Chr3	16451200	16451400	AT3TE66705	TE	ATREP3	RC/Helitron	CHH	Hypomethylated in SC-RTL1
Chr3	16902900	16903200	AT3G45990	Gene	protein_coding	-	CHH	Hypomethylated in SC-RTL1
Chr3	16902900	16903200	AT3TE68485	TE	ATREP1	RC/Helitron	CHH	Hypomethylated in SC-RTL1
Chr3	17163900	17163988	AT3TE69540	TE	HELITRONY1D	RC/Helitron	CHH	Hypomethylated in SC-RTL1
Chr3	17163988	17163989	17163988-17163989	Intergenic	-	-	CHH	Hypomethylated in SC-RTL1
Chr3	17163989	17164040	AT3TE69545	TE	ATREP11	RC/Helitron	CHH	Hypomethylated in SC-RTL1
Chr3	17164040	17164041	17164040-17164041	Intergenic	-	-	CHH	Hypomethylated in SC-RTL1
Chr3	17164041	17164100	AT3TE69550	TE	ATLINE1_3A	LINE/L1	CHH	Hypomethylated in SC-RTL1
Chr3	17363100	17363500	AT3TE70410	TE	META1	LTR/Copia	CHH	Hypomethylated in SC-RTL1
Chr3	17367600	17367900	AT3TE70410	TE	META1	LTR/Copia	CHH	Hypomethylated in SC-RTL1
Chr3	18110400	18110600	AT3TE73430	TE	VANDAL3	DNA/MuDR	CHH	Hypomethylated in SC-RTL1
Chr3	21654900	21655200	AT3TE88185	TE	ATREP10D	RC/Helitron	CHH	Hypomethylated in SC-RTL1
Chr3	22114800	22115000	AT3TE90030	TE	VANDAL2N1	DNA/MuDR	CHH	Hypomethylated in SC-RTL1
Chr3	22119300	22119700	AT3TE90045	TE	ATREP3	RC/Helitron	CHH	Hypomethylated in SC-RTL1
Chr4	684000	684200	AT4TE03530	TE	ATREP3	RC/Helitron	CHH	Hypomethylated in SC-RTL1
Chr4	1000200	1000500	AT4TE05105	TE	ATREP3	RC/Helitron	CHH	Hypomethylated in SC-RTL1
Chr4	5013700	5013900	AT4TE20945	TE	ATGP1	LTR/Gypsy	CHH	Hypomethylated in SC-RTL1
Chr4	5539800	5540400	AT4TE23180	TE	ATREP3	RC/Helitron	CHH	Hypomethylated in SC-RTL1
Chr4	5672000	5672200	AT4TE23775	TE	HELITRONY3	RC/Helitron	CHH	Hypomethylated in SC-RTL1
Chr4	5884000	5884200	AT4TE24775	TE	ARNOLDY2	DNA/MuDR	CHH	Hypomethylated in SC-RTL1
Chr4	5935300	5935600	AT4TE25010	TE	ARNOLDY2	DNA/MuDR	CHH	Hypomethylated in SC-RTL1
Chr4	6386800	6387000	6386189-6388669	Intergenic	-	-	CHH	Hypomethylated in SC-RTL1
Chr4	6529300	6529314	AT4TE27910	TE	HELITRONY3	RC/Helitron	CHH	Hypomethylated in SC-RTL1
Chr4	6529314	6529315	6529314-6529315	Intergenic	-	-	CHH	Hypomethylated in SC-RTL1
Chr4	6529315	6530400	AT4TE27915	TE	ATGP1	LTR/Gypsy	CHH	Hypomethylated in SC-RTL1
Chr4	7041000	7041300	AT4TE30490	TE	ATREP10D	RC/Helitron	CHH	Hypomethylated in SC-RTL1
Chr4	7360200	7360500	AT4TE32060	TE	META1	LTR/Copia	CHH	Hypomethylated in SC-RTL1
Chr4	7364200	7364500	AT4TE32060	TE	META1	LTR/Copia	CHH	Hypomethylated in SC-RTL1
Chr4	7555100	7555900	AT4TE32975	TE	ATREP9	RC/Helitron	CHH	Hypomethylated in SC-RTL1
Chr4	7578300	7578500	AT4TE33100	TE	ARNOLDY2	DNA/MuDR	CHH	Hypomethylated in SC-RTL1
Chr4	8899100	8899300	AT4TE39800	TE	ATREP1	RC/Helitron	CHH	Hypomethylated in SC-RTL1
Chr4	9574100	9574300	AT4TE43250	TE	META1	LTR/Copia	CHH	Hypomethylated in SC-RTL1
Chr4	9911900	9912100	AT4TE44990	TE	META1	LTR/Copia	CHH	Hypomethylated in SC-RTL1
Chr4	9912900	9913300	AT4TE44990	TE	META1	LTR/Copia	CHH	Hypomethylated in SC-RTL1
Chr4	11192500	11192900	AT4TE51405	TE	ATREP3	RC/Helitron	CHH	Hypomethylated in SC-RTL1
Chr4	16864800	16865100	AT4TE81120	TE	ATREP3	RC/Helitron	CHH	Hypomethylated in SC-RTL1
Chr5	1067200	1067600	AT5TE03885	TE	VANDAL2N1	DNA/MuDR	CHH	Hypomethylated in SC-RTL1
Chr5	4212800	4213000	AT5TE15240	TE	ATCOPIA78	LTR/Copia	CHH	Hypomethylated in SC-RTL1
Chr5	4314300	4314600	AT5TE15610	TE	ATREP3	RC/Helitron	CHH	Hypomethylated in SC-RTL1
Chr5	4781300	4781500	AT5TE17300	TE	ATREP3	RC/Helitron	CHH	Hypomethylated in SC-RTL1
Chr5	5129500	5129800	AT5TE18545	TE	ATREP3	RC/Helitron	CHH	Hypomethylated in SC-RTL1
Chr5	8281200	8281400	AT5TE29935	TE	ATREP11	RC/Helitron	CHH	Hypomethylated in SC-RTL1
Chr5	9134400	9134600	AT5TE33035	TE	ATREP3	RC/Helitron	CHH	Hypomethylated in SC-RTL1
Chr5	9289400	9289600	AT5TE33595	TE	ATREP10D	RC/Helitron	CHH	Hypomethylated in SC-RTL1
Chr5	9613300	9613500	AT5TE34865	TE	ATREP3	RC/Helitron	CHH	Hypomethylated in SC-RTL1
Chr5	10402100	10402300	AT5TE37975	TE	META1	LTR/Copia	CHH	Hypomethylated in SC-RTL1
Chr5	10404800	10405300	AT5TE37975	TE	META1	LTR/Copia	CHH	Hypomethylated in SC-RTL1
Chr5	10532900	10533100	AT5TE38415	TE	ARNOLDY1	DNA/MuDR	CHH	Hypomethylated in SC-RTL1
Chr5	11862300	11862600	11851813-11903701	Intergenic	-	-	CHH	Hypomethylated in SC-RTL1
Chr5	12973700	12973859	AT5TE46165	TE	VANDAL20	DNA/MuDR	CHH	Hypomethylated in SC-RTL1
Chr5	12973859	12973860	12973859-12973860	Intergenic	-	-	CHH	Hypomethylated in SC-RTL1
Chr5	12973860	12973923	AT5TE46170	TE	VANDAL20	DNA/MuDR	CHH	Hypomethylated in SC-RTL1
Chr5	12973923	12973924	12973923-12973924	Intergenic	-	-	CHH	Hypomethylated in SC-RTL1
Chr5	12973924	12974000	AT5TE46175	TE	VANDAL20	DNA/MuDR	CHH	Hypomethylated in SC-RTL1
Chr5	14150200	14150600	AT5TE50515	TE	ATREP3	RC/Helitron	CHH	Hypomethylated in SC-RTL1
Chr5	14625900	14626500	AT5TE52645	TE	ARNOLDY2	DNA/MuDR	CHH	Hypomethylated in SC-RTL1
Chr5	15301700	15301900	AT5TE55375	TE	ATDNA2T9B	DNA/MuDR	CHH	Hypomethylated in SC-RTL1
Chr5	15341500	15341594	AT5TE55495	TE	ATHATN7	DNA/HAT	CHH	Hypomethylated in SC-RTL1
Chr5	15341594	15341595	15341594-15341595	Intergenic	-	-	CHH	Hypomethylated in SC-RTL1
Chr5	15341595	15341700	AT5TE55500	TE	ATREP3	RC/Helitron	CHH	Hypomethylated in SC-RTL1
Chr5	15791000	15791106	AT5TE57000	TE	ATREP13	RC/Helitron	CHH	Hypomethylated in SC-RTL1
Chr5	15791106	15791107	15791106-15791107	Intergenic	-	-	CHH	Hypomethylated in SC-RTL1
Chr5	15791107	15791300	AT5TE57005	TE	ATREP13	RC/Helitron	CHH	Hypomethylated in SC-RTL1
Chr5	16014000	16014400	AT5TE57805	TE	ARNOLDY2	DNA/MuDR	CHH	Hypomethylated in SC-RTL1
Chr5	16120900	16121100	AT5TE58250	TE	HELITRONY3	RC/Helitron	CHH	Hypomethylated in SC-RTL1
Chr5	16358200	16358400	AT5TE59075	TE	ATREP3	RC/Helitron	CHH	Hypomethylated in SC-RTL1
Chr5	17618000	17618300	AT5TE63650	TE	ATREP3	RC/Helitron	CHH	Hypomethylated in SC-RTL1
Chr5	20280700	20280900	AT5TE73035	TE	ATREP3	RC/Helitron	CHH	Hypomethylated in SC-RTL1
Chr5	22912200	22912500	AT5TE82430	TE	META1	LTR/Copia	CHH	Hypomethylated in SC-RTL1
Chr1	587600	587900	AT1TE01910	TE	ATREP2	RC/Helitron	CHH	Hypermethylated in SC-RTL1
Chr1	1184600	1184970	1183704-1184970	Intergenic	-	-	CHH	Hypermethylated in SC-RTL1
Chr1	1184970	1185000	AT1TE03860	TE	ATHPOGON1	DNA/Pogo	CHH	Hypermethylated in SC-RTL1
Chr1	4785700	4785900	AT1TE15510	TE	ATREP3	RC/Helitron	CHH	Hypermethylated in SC-RTL1
Chr1	6904100	6904800	6904069-6905034	Intergenic	-	-	CHH	Hypermethylated in SC-RTL1
Chr1	7282700	7283000	AT1TE23505	TE	ATREP5	RC/Helitron	CHH	Hypermethylated in SC-RTL1
Chr1	8189900	8190100	AT1TE26370	TE	ATREP2A	RC/Helitron	CHH	Hypermethylated in SC-RTL1
Chr1	9126200	9126500	AT1TE29390	TE	HELITRONY3	RC/Helitron	CHH	Hypermethylated in SC-RTL1
Chr1	11409600	11410000	AT1TE36890	TE	ATREP5	RC/Helitron	CHH	Hypermethylated in SC-RTL1
Chr1	11700500	11700800	AT1TE37890	TE	ATREP3	RC/Helitron	CHH	Hypermethylated in SC-RTL1
Chr1	15196400	15196600	AT1TE49870	TE	ATREP18	DNA	CHH	Hypermethylated in SC-RTL1
Chr1	16360000	16360023	AT1G43330	Gene	protein_coding	-	CHH	Hypermethylated in SC-RTL1
Chr1	16360021	16360200	AT1TE53915	TE	ATGP1	LTR/Gypsy	CHH	Hypermethylated in SC-RTL1
Chr1	17092000	17092200	17091464-17093643	Intergenic	-	-	CHH	Hypermethylated in SC-RTL1
Chr1	17332600	17332800	AT1G47280	Gene	protein_coding	-	CHH	Hypermethylated in SC-RTL1
Chr1	17332600	17332800	AT1TE57440	TE	ATREP11	RC/Helitron	CHH	Hypermethylated in SC-RTL1
Chr1	17563500	17563800	AT1TE58290	TE	ATREP10C	RC/Helitron	CHH	Hypermethylated in SC-RTL1
Chr1	21132000	21132147	AT1TE69860	TE	ARNOLDY1	DNA/MuDR	CHH	Hypermethylated in SC-RTL1
Chr1	21132147	21132200	21132147-21132485	Intergenic	-	-	CHH	Hypermethylated in SC-RTL1
Chr1	24772300	24772500	24771371-24773155	Intergenic	-	-	CHH	Hypermethylated in SC-RTL1
Chr1	24897500	24897699	AT1TE81800	TE	BRODYAGA1	DNA/MuDR	CHH	Hypermethylated in SC-RTL1
Chr1	24897699	24897700	24897699-24899623	Intergenic	-	-	CHH	Hypermethylated in SC-RTL1
Chr1	26635100	26635300	26634102-26636255	Intergenic	-	-	CHH	Hypermethylated in SC-RTL1
Chr1	28827700	28828200	AT1TE94305	TE	ATREP10D	RC/Helitron	CHH	Hypermethylated in SC-RTL1
Chr1	28994500	28994619	28993170-28994619	Intergenic	-	-	CHH	Hypermethylated in SC-RTL1
Chr1	28994619	28994700	AT1TE94830	TE	VANDAL14	DNA/MuDR	CHH	Hypermethylated in SC-RTL1
Chr2	27700	27900	AT2TE00015	TE	ATGP2	LTR/Gypsy	CHH	Hypermethylated in SC-RTL1
Chr2	2559200	2559353	AT2TE11515	TE	ARNOLD3	DNA/MuDR	CHH	Hypermethylated in SC-RTL1
Chr2	2559353	2559354	2559353-2559354	Intergenic	-	-	CHH	Hypermethylated in SC-RTL1
Chr2	2559354	2559400	AT2TE11520	TE	ATMUN1	DNA/MuDR	CHH	Hypermethylated in SC-RTL1
Chr2	4355800	4356000	AT2TE18320	TE	ARNOLDY2	DNA/MuDR	CHH	Hypermethylated in SC-RTL1
Chr2	5787500	5787700	AT2TE23515	TE	ATGP1	LTR/Gypsy	CHH	Hypermethylated in SC-RTL1
Chr2	6270900	6271099	AT2TE25540	TE	ATGP1	LTR/Gypsy	CHH	Hypermethylated in SC-RTL1
Chr2	6271099	6271100	6271099-6271165	Intergenic	-	-	CHH	Hypermethylated in SC-RTL1
Chr2	6629500	6629900	AT2TE26995	TE	ATREP10D	RC/Helitron	CHH	Hypermethylated in SC-RTL1
Chr2	6629500	6629900	AT2TE27010	TE	ATREP13	RC/Helitron	CHH	Hypermethylated in SC-RTL1
Chr2	7154300	7154500	AT2TE29105	TE	ATREP3	RC/Helitron	CHH	Hypermethylated in SC-RTL1
Chr2	7278700	7278900	AT2TE29680	TE	HELITRONY3	RC/Helitron	CHH	Hypermethylated in SC-RTL1
Chr2	8911300	8911500	8910535-8911860	Intergenic	-	-	CHH	Hypermethylated in SC-RTL1
Chr2	9311700	9311900	AT2TE39505	TE	VANDAL18NA	DNA/MuDR	CHH	Hypermethylated in SC-RTL1
Chr2	11623700	11623900	11623633-11623910	Intergenic	-	-	CHH	Hypermethylated in SC-RTL1
Chr2	14310600	14310800	14310351-14310908	Intergenic	-	-	CHH	Hypermethylated in SC-RTL1
Chr2	16866000	16866300	16865442-16867293	Intergenic	-	-	CHH	Hypermethylated in SC-RTL1
Chr3	10937800	10937832	AT3TE45485	TE	ATREP15	RC/Helitron	CHH	Hypermethylated in SC-RTL1
Chr3	10937832	10938100	10937832-10938648	Intergenic	-	-	CHH	Hypermethylated in SC-RTL1
Chr3	11536800	11537000	AT3TE48060	TE	ATREP3	RC/Helitron	CHH	Hypermethylated in SC-RTL1
Chr3	16880400	16880600	AT3TE68385	TE	ATREP3	RC/Helitron	CHH	Hypermethylated in SC-RTL1
Chr3	22700300	22700500	AT3TE92525	TE	ATCOPIA78	LTR/Copia	CHH	Hypermethylated in SC-RTL1
Chr4	16600	16900	AT4TE00085	TE	ATREP11	RC/Helitron	CHH	Hypermethylated in SC-RTL1
Chr4	79100	79300	AT4TE00380	TE	ATREP10B	RC/Helitron	CHH	Hypermethylated in SC-RTL1
Chr4	1881800	1882000	AT4TE09255	TE	HELITRONY3	RC/Helitron	CHH	Hypermethylated in SC-RTL1
Chr4	4001400	4001800	3997945-4015817	Intergenic	-	-	CHH	Hypermethylated in SC-RTL1
Chr4	4645400	4645600	AT4TE19530	TE	ATGP1	LTR/Gypsy	CHH	Hypermethylated in SC-RTL1
Chr4	5014600	5014800	AT4TE20945	TE	ATGP1	LTR/Gypsy	CHH	Hypermethylated in SC-RTL1
Chr4	5867100	5867198	AT4TE24700	TE	ARNOLDY2	DNA/MuDR	CHH	Hypermethylated in SC-RTL1
Chr4	5867198	5867199	5867198-5867199	Intergenic	-	-	CHH	Hypermethylated in SC-RTL1
Chr4	5867199	5867299	AT4TE24705	TE	HELITRONY3	RC/Helitron	CHH	Hypermethylated in SC-RTL1
Chr4	5867299	5867300	5867299-5867300	Intergenic	-	-	CHH	Hypermethylated in SC-RTL1
Chr4	5867300	5867500	AT4TE24710	TE	HELITRONY3	RC/Helitron	CHH	Hypermethylated in SC-RTL1
Chr4	5885300	5885365	AT4TE24780	TE	HELITRONY3	RC/Helitron	CHH	Hypermethylated in SC-RTL1
Chr4	5885365	5885366	5885365-5885366	Intergenic	-	-	CHH	Hypermethylated in SC-RTL1
Chr4	5885366	5885600	AT4TE24785	TE	HELITRONY3	RC/Helitron	CHH	Hypermethylated in SC-RTL1
Chr4	6536000	6536400	AT4TE27915	TE	ATGP1	LTR/Gypsy	CHH	Hypermethylated in SC-RTL1
Chr4	8822200	8822400	AT4G15417	Gene	protein_coding	-	CHH	Hypermethylated in SC-RTL1
Chr4	15548400	15548800	15548149-15548840	Intergenic	-	-	CHH	Hypermethylated in SC-RTL1
Chr4	17213200	17213400	AT4TE82985	TE	ARNOLDY1	DNA/MuDR	CHH	Hypermethylated in SC-RTL1
Chr5	6635000	6635300	AT5TE24040	TE	ATDNAI27T9A	DNA/MuDR	CHH	Hypermethylated in SC-RTL1
Chr5	7488600	7488900	AT5TE27075	TE	ATREP1	RC/Helitron	CHH	Hypermethylated in SC-RTL1
Chr5	7711700	7711900	AT5TE27905	TE	ATREP3	RC/Helitron	CHH	Hypermethylated in SC-RTL1
Chr5	10198500	10198800	AT5TE37165	TE	ATDNA2T9B	DNA/MuDR	CHH	Hypermethylated in SC-RTL1
Chr5	12114700	12114900	AT5TE43215	TE	ATCOPIA27	LTR/Copia	CHH	Hypermethylated in SC-RTL1
Chr5	12566100	12566400	12565757-12566806	Intergenic	-	-	CHH	Hypermethylated in SC-RTL1
Chr5	12884800	12885000	12870018-12887500	Intergenic	-	-	CHH	Hypermethylated in SC-RTL1
Chr5	12973500	12973700	AT5TE46165	TE	VANDAL20	DNA/MuDR	CHH	Hypermethylated in SC-RTL1
Chr5	13918000	13918400	AT5TE49620	TE	ATREP3	RC/Helitron	CHH	Hypermethylated in SC-RTL1
Chr5	14359300	14359500	14359284-14359687	Intergenic	-	-	CHH	Hypermethylated in SC-RTL1
Chr5	15717100	15717300	AT5TE56770	TE	ARNOLDY1	DNA/MuDR	CHH	Hypermethylated in SC-RTL1
Chr5	15779500	15779700	AT5TE56960	TE	ATREP11A	RC/Helitron	CHH	Hypermethylated in SC-RTL1
Chr5	16357800	16358000	AT5TE59075	TE	ATREP3	RC/Helitron	CHH	Hypermethylated in SC-RTL1
Chr5	17777200	17777500	AT5TE64195	TE	ATREP3	RC/Helitron	CHH	Hypermethylated in SC-RTL1
Chr5	18479900	18480200	AT5TE66530	TE	VANDALNX2	DNA/MuDR	CHH	Hypermethylated in SC-RTL1
Chr5	18855600	18855800	AT5TE67885	TE	ATREP3	RC/Helitron	CHH	Hypermethylated in SC-RTL1
Chr5	19752200	19752201	19752200-19752201	Intergenic	-	-	CHH	Hypermethylated in SC-RTL1
Chr5	19752201	19752270	AT5TE71075	TE	ATREP5	RC/Helitron	CHH	Hypermethylated in SC-RTL1
Chr5	19752270	19752500	19752270-19752841	Intergenic	-	-	CHH	Hypermethylated in SC-RTL1
Chr5	26843300	26843500	AT5G67280	Gene	protein_coding	-	CHH	Hypermethylated in SC-RTL1
