# Supplementary material for: Targeted suppression of siRNA biogenesis in Arabidopsis pollen reveals distinct Pol IV activities in the sperm and vegetative cell lineages
Source: Research Square preprint supplement (doi:10.21203/rs.3.rs-2947716/v1), 2023-05-31
Supplement: Supplementary file 3 [file af83699619a11db01a8e21f1.xlsx]

## Sheet: DESeq sRNA VC-RTL1
siRNA-producing genes and TEs deregulated in VC-RTL1 pollen (vs WT Col-0)
	baseMean	log2FoldChange	lfcSE	stat	pvalue	padj
AT2G40850	2104.31252750232	4.24023986857447	0.304814205179502	13.9108998088768	5.4390848013963e-44	5.15516457476341e-40
AT3G20580	1861.35778738579	4.16555076498655	0.323042380758905	12.8947500795427	4.81822604239536e-38	2.28335732149116e-34
AT5G20390	1432.68792160058	4.1525440761363	0.342801320702407	12.1135591532368	8.95235155982161e-34	2.82834626946631e-30
AT1G64740	750.29687524534	3.66541952643763	0.31809354558064	11.5230867691668	1.00929306468844e-30	2.39151991677926e-27
AT3G61160	973.704699468446	3.34566527891286	0.294733338453539	11.3514992788651	7.29017972753551e-30	1.38192646915163e-26
AT2G38500	462.11698707119	4.83038551907201	0.432197768821026	11.1763314564271	5.32458168978564e-29	8.41106420929805e-26
AT3G46520	527.475468837283	4.50481894700054	0.435308533613403	10.3485656704384	4.24802084240451e-25	5.75182022061571e-22
AT4G03290	407.15893260183	2.93232062454011	0.305466113541897	9.59949563812392	8.03365670470546e-22	9.51787478089979e-19
AT3G62640	220.380206524918	3.3407921958934	0.359410795270905	9.29519157424108	1.46941341574442e-20	1.54745559493618e-17
AT3G28840	321.809912022847	3.42570310026705	0.403363631246457	8.4928407890446	2.01646451867812e-17	1.91120507080313e-14
AT4G02620	72.749243867589	4.93444988726112	0.60705926389755	8.12844837517195	4.34820232257275e-16	3.74656923757677e-13
AT2G34208	720.260094234584	-2.49698880214033	0.307863886254383	-8.11069083977297	5.03327689107406e-16	3.97544986446666e-13
AT1G48020	187.782087268411	2.64061764463473	0.335693756726316	7.86615059626375	3.65720251123456e-15	2.66638195396009e-12
AT3G02468	767.056826978294	2.93183789001065	0.375292664386089	7.81213748157482	5.62261801492319e-15	3.56666240827058e-12
AT3G02470	767.843834913271	2.93035452315848	0.375126441282571	7.81164482338139	5.64464403081438e-15	3.56666240827058e-12
AT1G76065	937.703506345401	2.10649917060707	0.274388785480568	7.67706000417519	1.62781195261759e-14	9.64275105431844e-12
AT5G50040	116.391891844717	3.45387985318575	0.457909903429364	7.54270616843852	4.60317552392836e-14	2.56640574210547e-11
AT1G76062	888.969870617093	2.04620262805407	0.2751366707784	7.43704073421068	1.02965808061399e-13	5.42172182669968e-11
AT2G38910	71.177137297472	3.91834335753052	0.540737381845479	7.24629642610916	4.28322160625968e-13	2.13665128337522e-10
AT1G79400	62.7443516106474	3.5106832623174	0.485699984962786	7.22809011943121	4.89833654593355e-13	2.32132168911791e-10
AT5G58170	1427.93117808377	2.74609071695005	0.381735574180664	7.19369873463877	6.30592548732127e-13	2.84607436994433e-10
AT5G55980	57.8126741257135	3.59964687541671	0.506585351864353	7.10570659449422	1.1970848744754e-12	5.1572592910354e-10
AT4G29460	80.7526698729892	3.04229515431795	0.429219219764915	7.08797512838364	1.36088420172223e-12	5.60802628866232e-10
AT1G66210	629.309612266301	2.15828334710134	0.305761173082492	7.05872274541232	1.68039968490983e-12	6.63617842232306e-10
AT4G27500	168.404810939285	2.66525133456743	0.378796190252703	7.03610913507179	1.97682126543572e-12	7.49452478151991e-10
AT2G46860	107.019998377711	3.78028083071544	0.543081756496074	6.96079510220625	3.38357591645893e-12	1.23344355908453e-09
AT1G55535	79.1610788510075	3.59304703407881	0.532346428929923	6.74945268497668	1.48403894209994e-11	5.20952633082341e-09
AT1G19110	115.469469770189	2.70752297093879	0.405225456884947	6.6815224091598	2.36472609018184e-11	8.00459781526554e-09
AT1G76965	113.696195212409	2.85630155725699	0.438301291853357	6.51675368142109	7.18452578664429e-11	2.34810122089016e-08
AT5TE73320	175.233670595354	2.26605930503607	0.351543182666652	6.44603399174674	1.14814921938091e-10	3.62738610043077e-08
AT3G14040	2037.21285785906	2.31858844831448	0.36108681161584	6.42113855651206	1.35258843267494e-10	4.13543005319131e-08
AT3G56180	165.779716376583	3.11833053104462	0.486932381418341	6.4040319560624	1.51326416877985e-10	4.48209930990483e-08
AT3G21700	364.172396137567	2.07381848542208	0.329448515662603	6.29481811824561	3.07760503740977e-10	8.83925471047569e-08
AT1G11770	481.351344408222	2.50948885664273	0.402538013969398	6.23416613973135	4.54190856225827e-10	1.26612380450247e-07
AT5G48140	745.1189639806	2.11500084283	0.342762892055691	6.17044870331635	6.80964657340972e-10	1.84405229207935e-07
AT1G63070	1653.94398267654	-1.8270720478439	0.297958491707543	-6.13196837376006	8.67983616298508e-10	2.28520797646591e-07
AT5G28690	406.379052679044	2.20636601167983	0.362741483930384	6.08247501160708	1.18341345186756e-09	3.03145748562182e-07
AT5G15140	325.109831893362	2.22301554740369	0.370390008158127	6.00182374912942	1.95113434162123e-09	4.8665398131279e-07
AT2G03410	63.4728195560079	2.79152920949799	0.47232656628673	5.91016768640401	3.41759648618342e-09	8.30563576821703e-07
AT5G50030	1678.30897933373	2.44981652907686	0.414990044432627	5.9033139757033	3.56271306393012e-09	8.44184860498241e-07
AT5G14720	89.670750803259	2.74224802217551	0.468265096435758	5.85618711078058	4.73614601507696e-09	1.09485833977803e-06
AT4G21326	98.6446528116455	2.64082804713872	0.451886903391347	5.84400217691568	5.09613613843342e-09	1.15002805523981e-06
AT3G07850	2037.65695608472	2.07308263420274	0.358208453415401	5.78736379456313	7.14996203580905e-09	1.57598465524182e-06
AT4G15650	84.1512666614001	2.93420703367872	0.510423853192936	5.74856957668397	9.00016094585071e-09	1.93871648738121e-06
AT1G62930	2337.22253721369	-1.59955899336912	0.280916530458174	-5.69407215289269	1.24044622717459e-08	2.61265540914684e-06
AT1G62670	732.17904813164	-1.62077829309239	0.288221908094851	-5.62336952040094	1.87268222829884e-08	3.85853959996009e-06
AT1G69940	767.354150601859	1.92471531690118	0.344715139160244	5.58349517688707	2.357323186196e-08	4.75376790612036e-06
AT5G27870	432.792250837799	1.98473291026867	0.357850143926043	5.54626830240664	2.91830902520737e-08	5.76244436269071e-06
AT4G26650	129.696907450324	2.44189778381207	0.441348282163048	5.53281361342186	3.15134292996248e-08	6.09559761024171e-06
AT5G38760	67.0493338671779	2.88772775307786	0.533201991666483	5.41582326812487	6.10073387547585e-08	1.1564551134352e-05
AT5G47540	430.567985429986	1.99901721317393	0.371148787669785	5.38602651978072	7.20323392559782e-08	1.32369920166044e-05
AT1G62910	2798.70071578085	-1.4792054615941	0.274712565230891	-5.38455698359066	7.26232944569979e-08	1.32369920166044e-05
AT5G07410	995.180609181666	1.7460862015802	0.326436862378112	5.34892471658946	8.84783338780476e-08	1.58225971414365e-05
AT2G19570	121.985824516778	-2.10940939053623	0.397870294560615	-5.30175139831873	1.14696962036023e-07	2.01314408551376e-05
AT2G44090	58.6359624747925	2.85187371019994	0.540808439511696	5.27335282114854	1.33953685612917e-07	2.30838733134405e-05
AT5G40730	234.801473465799	1.93077911600076	0.366477775595038	5.26847531986304	1.37561532777303e-07	2.32822894225586e-05
AT1G63400	1711.23004912043	-1.54072832418385	0.292726927572268	-5.26336383523677	1.4144327353219e-07	2.35192867813701e-05
AT1G80540	71.2972269963821	2.40528232430473	0.457525318758769	5.25715676419848	1.46299598348439e-07	2.39073722956293e-05
AT2TE38245	2431.97420487705	-1.75931642915839	0.335267900832806	-5.24749439116673	1.54181742079495e-07	2.47683822276179e-05
AT3G26934	83.2671060048859	2.3910126932955	0.458092638269974	5.21949600047136	1.79410689196425e-07	2.83409085367287e-05
AT1G70645	206.141436660478	1.69407397613839	0.325562299877041	5.20353240156556	1.95535641181864e-07	3.01469848936699e-05
AT1G06700	175.415865502307	2.13552961430417	0.410524612615219	5.20195269340839	1.97205429775009e-07	3.01469848936699e-05
AT1G04540	290.870792057226	-2.34660738985898	0.452304055504878	-5.18811927794812	2.12428530241926e-07	3.19586922163965e-05
AT5TE24040	2512.94910693321	-1.70545360178605	0.32937612588998	-5.17783004817939	2.24481581026411e-07	3.32443191401301e-05
AT1G62914	1430.53367052604	-1.46909930783426	0.284129848334749	-5.17052086024919	2.33442411731044e-07	3.40394950521051e-05
AT3G28830	1162.68168634348	1.84948898986762	0.358817500812923	5.15440017746485	2.54444055893191e-07	3.64644551021448e-05
AT1G70650	210.380252397147	1.66806444611793	0.323772296519424	5.15196779974613	2.57767302367979e-07	3.64644551021448e-05
AT1G63130	1842.52971014125	-1.43001533290598	0.278163833414662	-5.1409103597384	2.73410480849009e-07	3.81085961395133e-05
AT4TE17475	714.274413368003	-1.55676655453855	0.304153832096484	-5.11835259088471	3.08215994584877e-07	4.23372637199343e-05
AT3G61230	102.375089569373	2.7152518722119	0.532488444727137	5.09917520107554	3.41136689587495e-07	4.61899077701468e-05
AT5G62460	90.7711712837988	2.17855262277452	0.428988632041948	5.07834581164727	3.80735235718194e-07	5.08254727343245e-05
AT1G63150	1966.72718477699	-1.352050010804	0.266606687423499	-5.07132819461612	3.95048810905058e-07	5.20037865244186e-05
AT1G13360	125.706873870855	-2.02801169346521	0.40106281892312	-5.05659362518459	4.26811378282064e-07	5.485846481774e-05
AT2G32470	345.267850103815	-1.88301977515995	0.372528551357596	-5.05469921244348	4.31069599050776e-07	5.485846481774e-05
AT5TE24035	261.687069013894	-2.07011045317118	0.409650084220524	-5.05336269394441	4.34098423858462e-07	5.485846481774e-05
AT1G70540	79.2515651361916	2.11947692482309	0.425872499232965	4.97678748602095	6.46482313379466e-07	8.06231495554024e-05
AT2G36020	479.030678535371	1.72352682978227	0.349156010144751	4.93626567982529	7.96326099191862e-07	9.80205034823438e-05
AT5G20230	192.819228603961	1.92569782891734	0.390690045745764	4.92896568491142	8.266609100081e-07	0.000100449898782779
AT3TE40125	1829.26640930789	-1.54232230442326	0.313212234443155	-4.92420836358861	8.47025468454408e-07	0.000101621612531783
AT1G63330	658.805657031219	-1.35377278145432	0.27600747378931	-4.90484102791986	9.35030364272663e-07	0.000110777722407204
AT1G60072	4578.23770636965	1.32903340163332	0.271107421101292	4.9022391059401	9.47504077731441e-07	0.000110869674675785
AT4G35010	990.583385905219	1.4729858968726	0.301023682060429	4.89325586209829	9.91813278045737e-07	0.000114639100601433
AT3G28980	447.550822925981	1.98532827769611	0.406567848295352	4.88314136501483	1.04408960872103e-06	0.000119227485680216
AT1G62590	644.918366829926	-1.3484685063845	0.276380224400281	-4.87903398049026	1.06606697839149e-06	0.000120287890728507
AT5TE47390	1081.04313579203	-1.35488344280377	0.279861543592424	-4.84126338121307	1.29016236600678e-06	0.000143860693000145
AT5G24240	248.640040815297	1.85911190857595	0.386289198914987	4.81274628904416	1.48870234267329e-06	0.000164068846556482
AT3G52010	257.043359198222	1.82592349684751	0.384938404584427	4.74341732365921	2.10142730666708e-06	0.000228934804742421
AT3TE59230	1202.61715401386	-1.35891955942141	0.287268829160478	-4.73048037753611	2.23989177612805e-06	0.000241246525615246
AT2TE15565	353.467625934777	-1.44734822341887	0.306586919095552	-4.72084140996174	2.3487101663307e-06	0.000250124437713285
AT1G12775	713.164516149589	-1.64305215774348	0.35003499592048	-4.69396539458227	2.6795938176987e-06	0.000282191002268314
AT3G03780	105.873887284187	2.25149997143671	0.482526665604985	4.66606331199088	3.07025134721171e-06	0.000319778486471127
AT5G01100	63.0164743010968	2.27694180774472	0.488938487822089	4.656908516012	3.20992994071642e-06	0.000330692564979459
AT4G00350	117.552407325425	2.04291070156257	0.439996759845608	4.64301305827664	3.43364640163532e-06	0.000349936565534404
AT1G12300	225.160400145291	-1.77585787197856	0.383081261475047	-4.63572106121989	3.55695359783347e-06	0.000356863935150085
AT1G63320	358.843584269302	-1.52784551505614	0.329663338702876	-4.63456300924372	3.57692275155709e-06	0.000356863935150085
AT3G54240	72.2857900157635	2.08997411330839	0.452027753893601	4.62355263654967	3.77222962386638e-06	0.000372429087239641
AT5TE33895	426.744147160928	-1.38213928315991	0.302257266770105	-4.57272474514618	4.81422396548284e-06	0.000470404275720066
AT4TE20970	711.371633215004	-1.33884163814302	0.293200962448786	-4.56629346289024	4.964236773462e-06	0.000480112613661968
AT4TE09465	100.325704083155	-1.8060496940607	0.396826583403253	-4.5512316200485	5.33327964286731e-06	0.000510594186415115
AT1TE46395	643.999355268756	-1.41444900244887	0.312135132564849	-4.53152770989341	5.85586540349914e-06	0.000553689039744691
AT2TE00010	2919.11296749925	-1.33164841772198	0.29396650129049	-4.52993253270746	5.9002524809257e-06	0.000553689039744691
AT1G49700	1364.57440632359	1.9435792213153	0.430086684527979	4.51904067536613	6.21204607470664e-06	0.000576126196244122
AT1G75220	58.7926591876417	2.0754889965928	0.459445197466007	4.51738098045166	6.26091983679516e-06	0.000576126196244122
AT4G10596	6253.20737123368	1.17086980383988	0.259709042258006	4.50839059610675	6.53212374218372e-06	0.000595302584888628
AT5TE48595	1650.88917862077	-1.21528145741731	0.27042458468186	-4.49397549726119	6.99056755451253e-06	0.000627007445315815
AT5G26692	114.347006456005	1.68619170960723	0.37526681955564	4.49331414806105	7.01232213583841e-06	0.000627007445315815
AT1G61226	361.610701708033	1.33941695529066	0.298703938606769	4.48409539404815	7.32239013884795e-06	0.000648613212485989
AT2TE13755	1230.12205511111	-1.30495142575393	0.292006441890012	-4.46891314214724	7.86180444250227e-06	0.000689946134315153
AT3TE54865	4348.32995919776	-1.20264552080075	0.269747146678035	-4.45841795033408	8.25667903717469e-06	0.000715841137833185
AT2G07708	33780.9885494378	1.70971415959414	0.383594160631751	4.4570912048775	8.30792626731909e-06	0.000715841137833185
AT3G43120	123.728508468264	2.34798688011832	0.527182992411166	4.45383654996036	8.43493230141131e-06	0.000720236832006995
AT3G11420	260.279875512273	-1.52848852767606	0.343683617465365	-4.44737092488877	8.69276601204461e-06	0.000735625323769275
AT5G07420	78.8276891664809	1.95059033744269	0.440120444630543	4.43194666650877	9.33861198873074e-06	0.000783286410877787
AT1G63080	2293.08038735509	-1.18621348269962	0.26776575900343	-4.43004171673953	9.42148611453053e-06	0.00078330566134667
AT1TE45355	3358.97890646149	-1.27305606961677	0.288948525003647	-4.40582304270527	1.05382969738166e-05	0.000868538945372464
AT5G46770	59.1934170180039	2.14325274007434	0.487236187045728	4.39879630671438	1.08852932621567e-05	0.000889403530506219
AT3G13724	1232.31671955607	-1.21207003764137	0.275800708751884	-4.39473140996083	1.10909799250449e-05	0.00089846416862885
AT3TE47230	6245.98532591508	-1.19624547769433	0.272401344460241	-4.39148154743756	1.12580891577382e-05	0.000904272618957989
AT1G23149	190.099408666221	1.61659166699881	0.369479411629378	4.37532272737405	1.21252948905653e-05	0.000957696208106484
AT1G23150	190.099408666221	1.61659166699881	0.369479411629378	4.37532272737405	1.21252948905653e-05	0.000957696208106484
AT1G63230	280.520322094729	-1.99813276784183	0.457690354971755	-4.36568685823659	1.26723916432478e-05	0.00099263576855126
AT3G18827	3557.26866633071	1.3150110113451	0.301905759753575	4.35570030998566	1.32642153586334e-05	0.00103047732105842
AT5TE44310	8897.84804044879	-1.18465851680055	0.272352634111115	-4.34972300035561	1.36309604807427e-05	0.00104492996737362
AT2G34770	72.3979346190872	2.09350932362796	0.481367892765599	4.34908384022071	1.36707444560381e-05	0.00104492996737362
AT2TE17440	381.444067588197	-1.41766030821492	0.326143908224357	-4.3467324468305	1.38180602885116e-05	0.0010477406033161
AT2TE22175	612.585127334832	-1.32259579452081	0.304931031669458	-4.33736044271969	1.44204037630734e-05	0.00108473481640008
AT2TE21705	4960.51018689278	-1.17810200368061	0.272573455772706	-4.32214501716926	1.54519568401023e-05	0.00115317832228732
AT3G09530	225.566033350746	1.41671871949265	0.328259050777131	4.31585577347727	1.58985763021601e-05	0.00117723989212401
AT1G11765	82.7524717041034	1.91636070716269	0.444648666704232	4.30983122330466	1.63379187261803e-05	0.00120039374950958
AT2TE23515	2069.78418485911	-1.16099514241305	0.270804571611483	-4.28720658408491	1.80934013284747e-05	0.00131914813685603
AT4TE17765	5527.25186401588	-1.18660765293815	0.277234575014546	-4.2801575268016	1.86761074847194e-05	0.00135123776137534
AT3TE46670	3433.49296498167	-1.16504747303247	0.272478639912092	-4.27573872729379	1.9050453762908e-05	0.00136788030882456
AT4TE08245	10884.2881001649	-1.15968266105105	0.271374239638974	-4.27337046653303	1.92540157513821e-05	0.00137210196459849
AT2TE21345	7127.49679499427	-1.18524758680371	0.277607850452332	-4.2695031313865	1.95908899172518e-05	0.001385689959968
AT3TE52670	599.956678320103	-1.3196056981014	0.310232120846755	-4.25360757132317	2.10353814905572e-05	0.00147683959827779
AT1G31163	413.41097713035	1.29797473913059	0.305906112616965	4.2430493723276	2.20502899519621e-05	0.00153671064826983
AT1G10770	369.587266128615	-1.73202755405241	0.409387527287686	-4.23077753620782	2.32884907704496e-05	0.00160932119100031
AT5G20410	145.620925796656	1.52778577354647	0.361230097165811	4.22939778698779	2.34317708755057e-05	0.00160932119100031
AT4G15980	110.756852663533	1.94888018998068	0.461499899958656	4.22292657085142	2.41150403309256e-05	0.00164433346947131
AT2TE22265	181.460758231623	-1.50633139501913	0.357241261106114	-4.21656611096694	2.48050589816605e-05	0.00167930249305841
AT4G13493	697.7970434755	1.3426829043495	0.318658019609525	4.21355441170064	2.51382991640396e-05	0.00168979290409055
AT1G02740	75.2602455301078	1.79751456358499	0.427154179233251	4.2081165325634	2.57508067045711e-05	0.00171877567567553
AT1TE37275	462.404399825634	-1.29604026261156	0.308284349741496	-4.20404170272778	2.62190598078289e-05	0.00173454383294101
AT5G44790	143.354946654539	1.65436642739882	0.39362607239348	4.20288833343607	2.63530609773692e-05	0.00173454383294101
AT4TE09460	178.776694602616	-1.38634746011221	0.330991246494805	-4.18847167347663	2.80839355996981e-05	0.00183572097664785
AT4TE21020	1333.45857857682	-1.61539373066905	0.386002763499225	-4.1849278902178	2.85256639919761e-05	0.00185182358435582
AT1G19910	69.1439121171761	1.93183916351727	0.461978058264313	4.18166865061802	2.89377484053905e-05	0.0018638867576708
AT4TE13450	9663.23817223739	-1.12873329496699	0.270008633734002	-4.18036001055785	2.91047942746653e-05	0.0018638867576708
AT2G20440	59.5278344977237	2.16607655768652	0.518791008065505	4.17523920810327	2.97673095080279e-05	0.00189352053367174
AT4TE21295	14773.6317601784	-1.12414766645333	0.269441416770632	-4.17214131341317	3.01750387466503e-05	0.00190666011493834
AT4G35380	60.5119131366333	1.98237294170565	0.475949893637183	4.16508747707971	3.11233206266713e-05	0.00194928762347097
AT1G66795	1970.74645211312	-1.33369742962938	0.320299630794678	-4.16390561025755	3.12849489932441e-05	0.00194928762347097
AT1G66783	1964.29461230356	-1.34124615647017	0.322214811968188	-4.16258380015935	3.14666603071385e-05	0.00194928762347097
AT2TE13750	1440.10241440261	-1.18608550761878	0.28523764115611	-4.15823627909486	3.20714205052956e-05	0.00197385015291683
AT2TE28180	159.928956257399	-2.16096063120471	0.520158836272476	-4.15442453441804	3.2610722034447e-05	0.00199409305446767
AT3TE47360	2231.09981919418	-1.12225093201364	0.270580602425734	-4.14756609288598	3.36028481215702e-05	0.00204158842625797
AT2TE16455	326.510117271542	-1.28686287184626	0.311082813320273	-4.13672120973582	3.52303714990032e-05	0.00212101635510094
AT5TE40960	1537.32143779404	-1.39694990111701	0.337771571627069	-4.13578293279036	3.5374646192357e-05	0.00212101635510094
AT3G28770	74.1410520997294	2.03046272216363	0.491109027141999	4.13444390134687	3.55815151362153e-05	0.00212101635510094
AT3TE52805	10223.825961428	-1.12234814750076	0.271644356194187	-4.13168218631585	3.60118101830445e-05	0.0021236121093644
AT2TE21355	1026.85412062763	-1.29595673716627	0.313692928139974	-4.13129089281859	3.60731746790112e-05	0.0021236121093644
AT5TE39170	15447.4368232206	-1.11679496800373	0.270728054806358	-4.12515418397453	3.70486474958789e-05	0.00216757457386383
AT3TE52800	10393.3576001862	-1.11644330100057	0.271591324955851	-4.11074728245484	3.94380663272298e-05	0.0022793822611364
AT3TE62720	3038.43977790102	-1.09996341019625	0.267605742242677	-4.11038791984796	3.94994972253824e-05	0.0022793822611364
AT1TE52795	13221.5650617736	-1.10284367949399	0.268375657079659	-4.10932828817125	3.9681164073381e-05	0.0022793822611364
AT5G26038	172.016246329246	1.45711262922516	0.354861139307246	4.10614876587983	4.02310434566795e-05	0.00229704716796632
AT3G20530	121.157293222416	1.6014228823797	0.390303183439758	4.10302285588936	4.07786947485882e-05	0.00231437406483305
AT5TE52390	621.30307508765	-1.2932845482205	0.315842096855448	-4.09471872526352	4.2268121780234e-05	0.00237319587372739
AT3TE45980	10811.6598506787	-1.13246219411603	0.276584222110472	-4.09445696314414	4.23159002595409e-05	0.00237319587372739
AT2TE23510	5255.94195507092	-1.14166853075903	0.279165583067859	-4.08957479003246	4.321647062806e-05	0.0023846452007498
AT1TE49330	486.217091491444	-1.21994453383226	0.298309286877899	-4.0895291816094	4.32249686941689e-05	0.0023846452007498
AT5TE47395	5228.1571437336	-1.12252272636861	0.274504987871778	-4.08926167451989	4.32748443267532e-05	0.0023846452007498
AT3TE57605	2140.07985701552	-1.0901331864876	0.267262967091445	-4.07887856051008	4.52534666967952e-05	0.00247926218122673
AT5G15110	249.663920226078	1.25810251845155	0.308554995244217	4.07740123427844	4.55418648405626e-05	0.00248072295953363
AT3TE52415	2857.2257525559	-1.05110283212975	0.257934393400146	-4.07507823316576	4.59988804130868e-05	0.00249129936317278
AT3G19890	8829.09540173124	-1.13317894729055	0.278423258226354	-4.06998666170802	4.70158294563032e-05	0.00251764785228237
AT2TE23665	3328.13740723541	-1.09921466173548	0.270078462562305	-4.06998266839547	4.70166353507047e-05	0.00251764785228237
AT4G27350	77.752820907708	1.6833139942173	0.414610494731922	4.05998887053183	4.90750550717891e-05	0.00261310883129448
AT4TE18270	1660.87647180278	-1.34974375075593	0.332823222964994	-4.05543741428731	5.00405702443553e-05	0.0026496342166257
AT5TE43345	3155.10221763864	-1.09554607483308	0.270324431185689	-4.05270833282745	5.06281051477735e-05	0.00266448228881694
AT5TE13800	295.362887679966	-1.41893345557684	0.350251089333205	-4.05118927189679	5.09579651980484e-05	0.00266448228881694
AT1G04820	209.989461451837	1.67925872943056	0.414709236899269	4.04924361460134	5.13834353841213e-05	0.00266448228881694
AT1G30710	173.543758110649	1.33731580722555	0.33028615318211	4.04896116395227	5.14454799381199e-05	0.00266448228881694
AT4G20890	226.486982146182	1.46533769535887	0.362448862372719	4.04288121023817	5.27983733350784e-05	0.00271969012211888
AT2TE21360	6910.65561431678	-1.16449252010493	0.288385954531802	-4.03796544805902	5.39167920552842e-05	0.00275799358424608
AT1TE44720	13937.9615283095	-1.08761931620612	0.269408386885067	-4.03706554491978	5.41239509041749e-05	0.00275799358424608
AT5TE42155	335.136682083423	-1.31616501734259	0.32627396831146	-4.03392591861998	5.48526175581915e-05	0.0027801770546339
AT3TE61225	366.882061550628	-1.24759112121891	0.309417400112742	-4.03206516751911	5.52888499483182e-05	0.00278738148835191
AT2TE16150	438.25015324475	-1.210424535703	0.30046039427629	-4.02856602321417	5.61181014901871e-05	0.00281421886732271
AT4G30140	225.521285021122	1.64048291497712	0.407382631185305	4.0268847746504	5.652071286398e-05	0.00281949113960422
AT5TE43030	968.900016584098	-1.19429557563471	0.297358358050197	-4.0163511241648	5.91061731453257e-05	0.00293302779618533
AT2G35765	373.570923300651	1.43556031359325	0.357573970740628	4.01472263380871	5.95157424319444e-05	0.00293796982692692
AT3G23325	403.818062879561	1.18205883208543	0.29497241188737	4.00735385564389	6.14028326396038e-05	0.00300126075424255
AT2TE18980	12292.9376632449	-1.09791710341595	0.274055128068211	-4.00619069292761	6.17058380918474e-05	0.00300126075424255
AT3TE50265	552.803568954248	-1.35926206046832	0.339393752043131	-4.00497078182978	6.20251471926992e-05	0.00300126075424255
AT2G16730	296.932744565831	1.48010745841383	0.369581432402919	4.00482093700045	6.20644764540556e-05	0.00300126075424255
AT1G35490	200.107742156356	1.31884350791736	0.330165869165263	3.99448771386246	6.48342831632427e-05	0.0031192859686356
AT1G65970	740.443435351236	1.30530986742804	0.327492560597817	3.98576952418484	6.72617775106131e-05	0.00321973296588682
AT3G23326	401.21555110445	1.1727773369381	0.294830223517684	3.97780567726551	6.95541770363898e-05	0.00331273613040655
AT4TE19530	3675.45032913837	-1.05551477077735	0.266600108479317	-3.95916857197844	7.52111381371768e-05	0.00356022735930916
AT3TE51930	15444.6878083266	-1.06518848062537	0.269183508144597	-3.95710899217936	7.58623222837632e-05	0.00356022735930916
AT3TE53170	12079.6250386217	-1.06840537613147	0.270121532048141	-3.95527660468423	7.64461525406707e-05	0.00356022735930916
AT5G58950	156.640696023468	2.04679483476788	0.517504565223319	3.95512421013064	7.6494898958491e-05	0.00356022735930916
AT1G18990	72.0927572504684	1.71043116395221	0.432564408423183	3.95416527722935	7.68023076386157e-05	0.00356022735930916
AT3TE45975	3715.28685230389	-1.05165561573722	0.266003723204083	-3.9535372026743	7.70042845176596e-05	0.00356022735930916
AT1TE53915	3073.8317652802	-1.06676671186515	0.270064108699447	-3.95004992334006	7.81348941922688e-05	0.00358724571282902
AT3G07880	62.4503155819533	1.85013938442844	0.468460258197075	3.94940521005756	7.83456280392073e-05	0.00358724571282902
AT3TE48365	2269.31567762108	-1.12027656366713	0.28382124239254	-3.94712021631463	7.90968464521426e-05	0.003604230339776
AT1TE63880	197.41079225765	-1.47180833045038	0.373906533921184	-3.93630010959001	8.2747482715269e-05	0.00375253895299196
AT3TE50775	4880.36349331616	-1.04794710777485	0.266480482708481	-3.93254731875155	8.40504278998104e-05	0.00379347597921144
AT1TE51615	2530.21906509373	-1.09100897059513	0.277518342967947	-3.93130399571872	8.44863607028732e-05	0.00379507927365797
AT5G43060	100.410554769113	1.5403869923253	0.392086444316712	3.92869229388874	8.5409040863175e-05	0.00381842872311874
AT2TE16415	305.743582497384	-1.18006437282518	0.300811627451358	-3.92293470443061	8.74768649898171e-05	0.00389251514729336
AT1TE45560	14018.430038663	-1.05395868980857	0.269014187564335	-3.91785540885837	8.93402658879834e-05	0.0039568553275061
AT4TE19675	6118.06085668892	-1.0577073144644	0.270334152792842	-3.91259226234327	9.13106345591635e-05	0.00402531253186861
AT4TE52410	243.89240058571	-1.22276207695232	0.313004218502926	-3.90653545438044	9.36289107819486e-05	0.00410840192773754
AT2TE07550	14495.814046154	-1.06682299322661	0.27360820283015	-3.8990899475659	9.65549041851884e-05	0.00421726904086274
AT5TE33235	11272.8769714407	-1.06569767610921	0.27351644361147	-3.89628375551355	9.76799408312094e-05	0.00424683706054222
AT5G53588	226.547288708964	-1.40872221736743	0.361933176603418	-3.89221632177427	9.93326143297919e-05	0.00427942963008076
AT5G53590	226.547288708964	-1.40872221736743	0.361933176603418	-3.89221632177427	9.93326143297919e-05	0.00427942963008076
AT4G22780	59.9921029424505	1.65026421313998	0.424759875731922	3.88516973336132	0.000102258420331173	0.00438554437963286
AT2TE23670	8594.69759150981	-1.0658230961926	0.274685161276698	-3.88016262414321	0.000104386646925135	0.00443878780626771
AT5G44340	189.521728717112	1.4309331568688	0.368799325942692	3.87997769033653	0.000104466046236334	0.00443878780626771
AT1TE12235	237.40549698082	-1.42242613027658	0.366703157293709	-3.87895795818658	0.000104904881684318	0.00443878780626771
AT5TE44225	1620.48315184931	-1.02687255793488	0.264855428180684	-3.87710595545866	0.00010570633192855	0.0044528205067502
AT3TE51505	14553.6608114539	-1.04227908787097	0.269085367280936	-3.87341421944653	0.000107321192024856	0.00450084184960878
AT1TE53315	352.414359807833	-1.19487501048252	0.30889202309816	-3.86826114348317	0.000109614237946416	0.00455837250922695
AT4TE19025	524.265373077434	-1.25101334004687	0.323412130852682	-3.86817073542836	0.000109654877833271	0.00455837250922695
AT1G60740	673.277270286677	1.33574182406793	0.345589733495338	3.86510852205612	0.000111039817181274	0.00459578771722321
AT3TE47400	2408.32887204303	-1.02221507602717	0.264624510322208	-3.86288887141449	0.000112053990317865	0.00461160634061892
AT1G67290	625.218332229859	1.51531628355301	0.392350804259958	3.86214649517838	0.000112395132378452	0.00461160634061892
AT5TE42715	1156.38851438555	-1.14919919152819	0.297706416778046	-3.86017608879748	0.000113305344797817	0.00462891404307632
AT4G04110	122.427079474605	-1.39777909393409	0.362902271074337	-3.85166808076482	0.000117315965560155	0.00476027292849743
AT3TE53860	3373.56298366729	-1.02416115622037	0.265930802152524	-3.85123177883307	0.000117525202075163	0.00476027292849743
AT2TE25540	12993.0691913059	-1.03369366281389	0.269282617103107	-3.83869435737879	0.000123690285020947	0.00496870690163902
AT5G26030	211.267450211249	1.30387244522768	0.339670764043918	3.8386360654198	0.000123719648532054	0.00496870690163902
AT3TE66175	12651.7453231093	-1.04291088132482	0.271878547977097	-3.83594398706539	0.000125082915792257	0.00500226107965827
AT5TE46515	5453.98832670935	-1.0411935906097	0.271792867880191	-3.83083485129811	0.000127709204904566	0.00508583127767008
AT4TE16165	1682.57610737323	-1.0854462630775	0.28361813109642	-3.82713989010981	0.000129640845334603	0.0051411545275371
AT5TE39890	282.906049093614	-1.17186454285228	0.30691830969996	-3.81816433173337	0.000134448359696193	0.00530958980500217
AT2TE19860	422.121860798616	-1.14298838265852	0.29955757355787	-3.81558833276406	0.000135858843287572	0.00534302952979089
AT3G42640	1240.41364553281	1.08469069002099	0.284584803620822	3.81148492899226	0.000138134478955544	0.00541007682454811
AT4TE08355	3486.22957028274	-1.00391334271351	0.263573274484974	-3.80885863589612	0.000139609742559056	0.00544535448549271
AT1G11735	7456.76970744384	1.10528648409342	0.290422696809797	3.80578548520705	0.000141354860112167	0.00549082526288163
AT5TE47205	295.502777975836	-1.17387603564249	0.308882553932905	-3.80039604275442	0.000144465014848721	0.00556811560126177
AT3TE53850	3522.35464474833	-1.00581579222957	0.264667297901934	-3.80030249374536	0.000144519565088668	0.00556811560126177
AT2TE38250	99.3551724056125	-1.56575661912857	0.412209695503759	-3.79844684927915	0.000145605644089413	0.005587248156597
AT4G19270	359.405215354525	-1.34512776969251	0.354432870080203	-3.79515525574175	0.000147551092842694	0.00563906958856069
AT3TE58940	80.2518650449472	-1.51247855036401	0.398990717883546	-3.79076124474018	0.000150186271625861	0.00571625656588386
AT3TE48825	1956.14668412079	-1.00425935791836	0.265023590874321	-3.78932062087485	0.00015105984443934	0.00571625656588386
AT2TE22005	816.808914788773	-1.11241160341986	0.293638202201953	-3.78837492900459	0.000151635896183707	0.00571625656588386
AT3G12620	72.9794937032992	1.59884162269709	0.422142430326527	3.78744591359932	0.000152203802828675	0.00571625656588386
AT1TE54805	3751.97541553031	-1.10069538902442	0.290664672278578	-3.78682204616011	0.000152586295755288	0.00571625656588386
AT2TE11050	443.667646375495	-1.12847088518467	0.298328848710468	-3.7826408343092	0.000155173243531062	0.0057762686083035
AT1G05820	80.0360945522699	1.49876984645713	0.39634192716639	3.78150718792848	0.000155881720341457	0.0057762686083035
AT2TE21365	240.261103356092	-1.27416273710969	0.336964914009313	-3.78129201034408	0.000156016539747383	0.0057762686083035
AT5TE56030	13043.5693974438	-1.00825546977504	0.266808319511348	-3.77895064000116	0.00015749063545165	0.00579634856759298
AT3TE62245	3624.28844272369	-1.002934785819	0.265432676375193	-3.77849027299613	0.00015778201418432	0.00579634856759298
AT3TE59290	2660.06942227175	-1.06331423945104	0.281698749373319	-3.77465019570211	0.000160232345393101	0.00586363772060158
AT4G08878	171.365110112531	-1.25743594843549	0.333426128975443	-3.77125797639004	0.000162426646022611	0.00592107596539351
AT3G22142	413.865386415057	-1.13044442283735	0.299844475009426	-3.77010256000819	0.000163180475270624	0.00592576453875471
AT3G10745	21316.3347211946	1.37703975816482	0.365987702055585	3.76253013538602	0.00016820303305467	0.00605974114041544
AT3TE53080	2329.90602655015	-1.14861924327435	0.305322126884441	-3.76199149074145	0.000168565784160267	0.00605974114041544
AT1G62035	7550.01590329503	1.08774642793477	0.289178757485116	3.76150183849779	0.000168896179688006	0.00605974114041544
AT4TE27915	14365.3064534665	-1.02140279771298	0.271597912027977	-3.7607166788814	0.000169427242267366	0.00605974114041544
AT5TE62545	781.756352328226	-1.29332617014123	0.345125231545402	-3.74741123490152	0.000178669033105235	0.00636625975853916
AT2G15880	1564.43280887362	-1.45338532575732	0.388008699900527	-3.74575447955142	0.00017985242516974	0.00636711147682181
AT5G35407	940.932965957615	1.01540273274074	0.271099547369483	3.74549770589194	0.000180036492486626	0.00636711147682181
AT5TE47195	285.326565646445	-1.16770212094132	0.311973317170977	-3.74295510760416	0.000181868730626667	0.0063800333422927
AT2TE33330	370.987901956751	-1.18716269814781	0.317218461878915	-3.74241363858877	0.000182261179697029	0.0063800333422927
AT4TE19090	637.080162332348	-1.10000082545602	0.293945505735973	-3.74219303915487	0.000182421295184778	0.0063800333422927
AT5TE42825	595.448850641101	-1.03751339219784	0.277472284415996	-3.73916045121957	0.000184635855782456	0.0064337450040666
AT1TE51070	2899.28669698076	-0.999679452787735	0.267536302426117	-3.73661235399561	0.000186516128728162	0.00647545739225465
AT1TE53995	6525.8640738651	-0.997115701349028	0.266940651155811	-3.73534602928282	0.000187457246783411	0.00647807852973592
AT3G30820	423.813936179003	-1.19400858710296	0.319708929936734	-3.73467387144688	0.00018795859840445	0.00647807852973592
AT5TE44120	407.914226919617	-1.11151057573258	0.298022684185352	-3.72961735705086	0.000191770772474562	0.00658551949823876
AT4TE78070	830.277841860768	-1.58667152228197	0.42558965043559	-3.72817224445663	0.000192873541232602	0.00659947806426933
AT1TE52025	4061.57266637725	-1.04586172349045	0.280808071610612	-3.72447172722556	0.000195724644724403	0.00667294310322984
AT4G23375	45159.7688129369	1.0075953823957	0.271046744280568	3.71742293038837	0.000201265356368708	0.00681133017156525
AT1G71002	1150.76884662714	1.32215862434245	0.3557009977066	3.71705064890776	0.000201562046884657	0.00681133017156525
AT4TE20520	622.102333734188	-1.08607057354223	0.292223299640001	-3.71657761335319	0.000201939626314606	0.00681133017156525
AT1G12620	262.534106494528	-1.35297369615364	0.365135831417101	-3.70539831958622	0.000211058788034782	0.00709367089714066
AT3G02230	111.670234315235	1.5484359168789	0.41827274372012	3.7019766172357	0.000213926337697341	0.00714837388170549
AT3TE50185	498.667180110345	-1.09314520778485	0.295312279051563	-3.70165849959115	0.000214194786073471	0.00714837388170549
AT1TE51600	319.192891342092	-1.13980148303263	0.308576292410618	-3.69374288001331	0.000220977245510778	0.00734885029105668
AT4TE08720	537.151359239445	-1.07225039512314	0.290413197705291	-3.69215450122641	0.000222362306403127	0.00736905573457635
AT3TE48525	86.0373564822292	-1.54757258474467	0.419475254385658	-3.68930602834049	0.000224866598931433	0.00742608231593074
AT3TE58890	293.957211755403	-1.19078251744256	0.323245962957779	-3.68382796353159	0.000229757338158904	0.00755626221563469
AT3TE40130	98.0820561333927	-1.54589974671387	0.41973652997671	-3.68302407893744	0.000230483379064514	0.00755626221563469
AT3TE55460	1253.08503979954	-1.11619428205439	0.303129753845784	-3.68223266734235	0.00023120025770564	0.00755626221563469
AT4TE09955	248.921565082392	-1.1426453721894	0.310758621108266	-3.67695469916282	0.000236034937272761	0.00768776335213482
AT4G28000	107.837859102064	1.38170818343019	0.376007287952606	3.67468458112533	0.000238143430176228	0.00772987476441879
AT5TE36395	734.170330118767	-1.09137948918573	0.297375988938625	-3.67003231525521	0.000242519807492355	0.00784506053041822
AT3G60960	176.462892876086	1.33581673083732	0.36429638598058	3.66684046903646	0.000245565888759825	0.00791657650906673
AT5G26700	1015.30489525828	-1.313955842347	0.358976324569443	-3.66028551861452	0.000251934362335166	0.00807654270693489
AT3G29180	128.193934430855	1.43333521868303	0.391623485469946	3.65998279434911	0.000252232184137236	0.00807654270693489
AT5TE24045	106.559566297368	-1.51387287599389	0.413963740852304	-3.65701805882079	0.000255166409850454	0.00814298731502558
AT1TE44230	6852.02204381906	-0.994372213762644	0.271982074817478	-3.65602113459112	0.000256160245078925	0.00814727115053037
AT5TE24030	106.871285418638	-1.51160395160151	0.414557282706442	-3.6463090015763	0.000266034048612363	0.00843301241721731
AT4TE17090	84.0078684872302	-1.56338519702389	0.429062564682031	-3.64372314369229	0.000268722468416042	0.00847652482910375
AT1TE45705	818.425989942323	-1.00931692094248	0.277035934339035	-3.64327076684315	0.000269195397083797	0.00847652482910375
AT3TE48540	397.498271131988	-1.07106189651057	0.294111987612814	-3.64168052177654	0.000270864087177436	0.00850082721280707
AT3G23170	215.535960817914	1.37326296971022	0.377405960744619	3.63868913729073	0.00027402933709847	0.00857137949741999
AT3TE52725	949.450947306314	-1.09541453237993	0.301115709663683	-3.63785248402815	0.00027492080261824	0.00857137949741999
AT3G43860	621.113352716674	-1.17410586325281	0.322976115957447	-3.63527148059302	0.000277688052613382	0.00860448300968005
AT4G27790	402.348996592624	3.68171222197516	1.01280353635754	3.63516920094507	0.000277798248677157	0.00860448300968005
AT4TE19180	2609.58939502678	-0.974523448733869	0.268184764896831	-3.63377632248708	0.000279303020425549	0.00862291214199788
AT2TE22170	185.353176533948	-1.1928780857983	0.328598302606403	-3.63020160584071	0.000283199932301694	0.00871483428037485
AT3TE51650	1931.8254025306	-0.949055669527401	0.261771191492819	-3.62551610097032	0.000288384926868465	0.00881910934251228
AT4TE34435	997.205356881457	1.07039021746557	0.295242733860384	3.62545829145366	0.000288449450957882	0.00881910934251228
AT3TE04915	140.559654984773	-1.25557267671035	0.346403033861093	-3.62460069334679	0.000289408249009868	0.0088199722961914
AT3TE59610	118.970666384376	-1.28107355375132	0.353990077742507	-3.61895328230972	0.000295797026733612	0.00898578275442685
AT1TE45800	953.177732314094	-1.04786193113314	0.289900383353444	-3.61455862531783	0.000300859733712053	0.00911037877355539
AT1TE58335	96.1484278554964	-1.36427828648878	0.37778873060293	-3.61122017671481	0.00030475978935526	0.00919908689015653
AT2G29050	57.6177105413239	1.72199526608944	0.476986918087406	3.61015197857877	0.000306017647974892	0.00920773100795564
AT3TE24685	360.277728520553	-1.04635297812245	0.290322305043087	-3.60410812378731	0.000313226650700216	0.00938924502628067
AT4TE14330	1655.33090583446	-0.999215940411835	0.277294901161396	-3.60344144889362	0.000314031512273789	0.00938924502628067
AT2TE24445	317.7053213493	-1.06799947895664	0.296485870903129	-3.60219350656877	0.000315543331739481	0.00940477892524152
AT3TE67765	316.280363367781	-1.19887632422758	0.333128234741501	-3.59884332577776	0.000319635673650094	0.00949688688042506
AT1G12450	108.262913822649	3.75088166295908	1.04322020926821	3.59548408824463	0.000323788919646027	0.00959022306376576
AT3TE56730	815.106605307068	-1.04308560402189	0.290215189186577	-3.59417991506744	0.000325414923644993	0.0095993447094162
AT3TE62620	1484.79290228992	-0.995909648158682	0.277133149565758	-3.59361429594107	0.000326122493820639	0.0095993447094162
AT4G33970	2021.91778001169	-1.38286972532503	0.38503001829441	-3.59158938165603	0.000328667414152614	0.00964430263572284
AT1TE46870	189.423265625041	-1.17266591839226	0.326670229948194	-3.58975447067286	0.000330989577257038	0.00968246670753769
AT2G18470	511.239823810352	-1.28143457338987	0.357244536486225	-3.58699558009695	0.000334509991499319	0.00973796590534596
AT4TE20205	931.773287773944	-0.97474872155166	0.271770657366273	-3.58665917431242	0.000334941642239162	0.00973796590534596
AT5G07440	135.798335657768	1.35040159968366	0.376698620001306	3.5848328822627	0.000337294112600298	0.00977637186307531
AT1TE43820	454.606048371875	-1.08952581566276	0.304639558347758	-3.57644234245846	0.000348302094129656	0.0100646562443929
AT4TE16725	1024.47039237368	-0.993058027022953	0.277929157315857	-3.57306169893639	0.000352831585319979	0.0101622285220866
AT5TE46745	265.915698600425	-1.10923445935462	0.310507530246285	-3.57232708164857	0.000353823107437073	0.0101622285220866
AT2TE17810	756.508590428602	-1.00539189757572	0.281760381338778	-3.56825147949695	0.000359371497383977	0.0102904019704089
AT4G35180	161.771180399629	1.28461203322117	0.360375067563974	3.56465290982741	0.000364338000896729	0.0104011914834313
AT3G02970	329.861691660322	1.22279549996864	0.343705505780525	3.55768377114524	0.000374139342105955	0.0106489269804212
AT4TE20975	1615.4638416388	-0.977554054381049	0.275184279318473	-3.55236155496266	0.000381789867979468	0.0108053513865172
AT3TE57495	689.417441132184	-1.03339714023303	0.290911343300366	-3.55227516572308	0.000381915247360547	0.0108053513865172
AT2TE11040	481.327455178184	-1.03449877669689	0.29157840908036	-3.54792654215964	0.000388276494219785	0.0109526327744498
AT2G44570	59.9458014700681	1.92892482497636	0.543971494229575	3.54600350466579	0.000391121005401359	0.0110001332023563
AT2TE15960	93.755518691599	-1.40981542748131	0.397917466098848	-3.54298453220219	0.00039562590644054	0.0110939122521995
AT5TE46060	868.192083193842	-1.00797171856707	0.284674247382251	-3.54078996549906	0.000398931011386762	0.0111535932918104
AT3TE67735	228.52826127624	-1.16986382237601	0.330474052496106	-3.53995665783714	0.000400192749599391	0.0111559614138324
AT4TE18740	4182.11353536865	-0.947936742864724	0.267979110796728	-3.53735311698892	0.000404158917474179	0.011233484515602
AT4G26380	5776.90681902343	1.52959131396224	0.432941832354881	3.53301806305573	0.000410844400096471	0.0113588577728176
AT2G10606	369.645736939447	1.09784168373892	0.310750203725712	3.53287518584523	0.000411066492517033	0.0113588577728176
AT3G52230	60.7357815261392	-1.90467586059949	0.539634546796615	-3.52956620717865	0.000416241542186519	0.0114684224908251
AT3TE62010	205.683656052794	-1.20840291885448	0.342833207920699	-3.52475457725786	0.000423875303092321	0.0116420695766985
AT4G13560	63.8100520318018	1.69595112935063	0.481250296913282	3.52405212054598	0.000425000640803721	0.0116420695766985
AT1TE44225	402.92015258893	-1.11160379188694	0.315686987607806	-3.52122144884838	0.000429563716127751	0.0117331553356162
AT4TE18500	2987.80582327444	-0.971498280333181	0.276230250707677	-3.5169872881203	0.000436474684615845	0.0118876639677844
AT3TE53975	809.449884389971	-0.997660936712026	0.283758663775104	-3.5158783292789	0.000438301796023645	0.011903221841582
AT2TE06470	837.770257843666	-1.02739809529079	0.292284154956116	-3.51506599954091	0.000439644711567381	0.0119055787892447
AT4TE24870	915.06034429447	-0.952423911523298	0.271103598093876	-3.51313637376918	0.000442850115759744	0.0119228787371415
AT5TE46090	813.504917114938	-1.04704443529278	0.298138964576189	-3.51193423100927	0.000444858073350528	0.0119228787371415
AT3TE56630	938.611083954775	-0.975574736070331	0.277833750580402	-3.5113615031735	0.000445817695231289	0.0119228787371415
AT4TE15805	1638.97774235589	-0.971174726941104	0.276665671335771	-3.51028272590586	0.000447630466488555	0.0119228787371415
AT3TE51535	2270.33369871609	-0.965633625034649	0.275090616859465	-3.51023832095284	0.000447705231534369	0.0119228787371415
AT1TE52040	786.404786899419	-1.05415895428451	0.300316199399402	-3.51016347567232	0.000447831275630131	0.0119228787371415
AT4TE20515	658.367582134504	-1.01864007001148	0.290281798751512	-3.50914206261846	0.000449554711942582	0.0119352368621619
AT2TE19495	843.832481832877	-0.972699975256597	0.277374981619761	-3.50680501022988	0.000453521345662372	0.0120041485682576
AT2G46260	175.18693877568	1.41276643167639	0.40294252203069	3.50612396169195	0.000454683407470402	0.0120041485682576
AT4TE19830	942.028354754326	-0.970193410059869	0.277030378672747	-3.50211920695509	0.000461573053877619	0.0121521927907002
AT5TE36040	6271.68221505379	-0.940929143987057	0.268944942305408	-3.49859393495698	0.000467718303025327	0.0122607657080491
AT1TE66615	436.407943276524	-1.07178267377044	0.306374925856035	-3.49827150761699	0.000468284151330848	0.0122607657080491
AT5TE37385	309.762484883819	-1.03051067075369	0.29481539376835	-3.49544390332415	0.000473273925111402	0.0123369175319857
AT5TE42335	4848.7613411186	-0.923312714873974	0.264169719740277	-3.49514969309027	0.000473795946575522	0.0123369175319857
AT5TE33455	428.36201694431	-1.09911230147768	0.314840892703526	-3.49100871884731	0.000481200549655516	0.012495393999
AT3TE51260	262.46106277615	-1.11386871985934	0.319728146688929	-3.48379938205142	0.000494349889510358	0.0128017711824568
AT2TE05855	263.461487380326	-1.08036379663801	0.310345117056246	-3.48116898659699	0.000499230416897214	0.0128929315840648
AT2TE12145	928.366510781055	-0.967390165993968	0.278381116189124	-3.47505671087529	0.000510745363188959	0.0131371379807779
AT3G28790	403.984451019227	1.4120207176504	0.406374038834324	3.47468239285353	0.000511458526578079	0.0131371379807779
AT4G14960	206.308088088902	1.45509859642646	0.418960220775935	3.47311874557338	0.000514447690023089	0.0131782032595644
AT4TE39800	704.065427372373	-0.936081222940977	0.269836992337337	-3.46906187632989	0.000522279151028729	0.0133427541602434
AT3G13400	6035.53012851346	-1.44153302118716	0.415903558595635	-3.46602713873072	0.000528209960233737	0.0134579946319768
AT2TE20810	1447.79680661107	-0.910547090451945	0.263037756611125	-3.46165927729568	0.000536856345103158	0.0135976705132234
AT5TE48005	361.948264808454	0.991716919992364	0.286533095540463	3.46109030833515	0.000537992303786158	0.0135976705132234
AT3TE50575	1210.88567302701	-0.97282591754467	0.281084537103262	-3.46097272930842	0.000538227331871938	0.0135976705132234
AT3TE53965	783.262125760631	-0.922296697570082	0.266541262531345	-3.46023984733554	0.000539694443547312	0.0135976705132234
AT3G18217	1345.43810820749	-1.13273939053196	0.327413854003973	-3.45965626279887	0.000540865349597511	0.0135976705132234
AT4TE15475	961.515264105365	-0.957981290069893	0.277076641121427	-3.4574595902152	0.000545294015633718	0.0136727425401492
AT1TE46780	1686.73213986106	-0.935700334534753	0.270950558360925	-3.45339880528438	0.000553569953567439	0.0138423577060511
AT3TE49520	594.366687101901	-1.03116199603577	0.298692267948196	-3.45225540359356	0.000555921245118411	0.0138423577060511
AT1G35501	88448.8601013717	0.939476586425433	0.272153987916164	3.45200374838835	0.000556439996413323	0.0138423577060511
AT2TE39490	294.008564737623	-1.02534153086933	0.297287383119549	-3.44899107425963	0.000562685301261326	0.0139610766632326
AT2TE06480	489.522990734221	-0.951534852736623	0.276256924914108	-3.44438371285161	0.000572362784633511	0.0141641108949254
AT5TE41840	505.803647873179	-1.03745385950992	0.301407557104097	-3.4420300190138	0.0005773661742763	0.0142423425307112
AT3TE57920	3269.89762004527	-0.962660510157965	0.279779435491669	-3.4407836604082	0.000580032097157049	0.0142423425307112
AT3TE57995	3269.89762004527	-0.962660510157965	0.279779435491669	-3.4407836604082	0.000580032097157049	0.0142423425307112
AT2TE11325	473.465708770005	-1.09675632563352	0.318880144752854	-3.43939986129759	0.000583005425039298	0.01427836025458
AT5TE43975	3540.92179960966	-0.93247208938573	0.271358961414313	-3.43630475487421	0.000589707225995614	0.0143841096951438
AT2TE24600	375.166212891513	-1.01081424381222	0.294182936996045	-3.43600568453706	0.000590358585293409	0.0143841096951438
AT4TE24670	885.239440638405	-0.92794338183354	0.270312330802802	-3.43285627806041	0.000597258605362462	0.0144597475610529
AT4TE24750	885.239440638405	-0.92794338183354	0.270312330802802	-3.43285627806041	0.000597258605362462	0.0144597475610529
AT4TE21735	1316.79677234174	-0.928647974692222	0.270545512492481	-3.43250185943495	0.000598039780959352	0.0144597475610529
AT5TE46380	1025.82434852331	-0.989725502005542	0.288490294271141	-3.43070641078599	0.000602011769408459	0.0145187469477185
AT2TE17075	619.211644497513	-1.10961400097005	0.323578435974237	-3.42919637901457	0.000605371337275327	0.0145627145550648
AT1TE54255	291.708390247871	-1.14389740563512	0.333805260602559	-3.42684055838498	0.000610647506090185	0.0146524482600577
AT5TE45900	372.573931300905	-1.01715212594879	0.297196787896567	-3.42248694256678	0.000620510780655375	0.0148483226533118
AT4G19200	57.5488378945256	1.86690304618875	0.545581405064879	3.42185974239122	0.000621943879865453	0.0148483226533118
AT1G74010	116.248281587406	1.58903736759463	0.464709820921906	3.41941851894209	0.000627551239075142	0.0149392701615071
AT5G26717	72.5430323614357	1.40350526192227	0.410521874243092	3.41883185764465	0.000628905760122531	0.0149392701615071
AT1G21202	330.458361373968	1.00912624504287	0.29525971495223	3.41775797353913	0.000631392261009379	0.0149608396246172
AT4TE24820	847.03256937763	-0.921588428923714	0.269777670425905	-3.4161034435088	0.000635241111036681	0.0150145018713358
AT5TE47620	242.664024957181	-1.12559645852237	0.329607150093629	-3.41496371726958	0.000637905081796996	0.0150399611076416
AT1TE71725	645.270387900465	-0.91814437795162	0.269445186037552	-3.40753676639693	0.000655520766125906	0.0154169375219388
AT5TE44690	1917.16595475156	-0.939481599660251	0.276072148327298	-3.40302926373596	0.000666431422455519	0.0156347451040431
AT3G42060	168.596528752663	-1.19264518934656	0.350572886127366	-3.40198924828791	0.000668972696001265	0.0156556128708642
AT2TE11115	225.639450353579	-1.07537198562674	0.31632598425535	-3.39956892304698	0.000674921672802551	0.0157026137841952
AT3G11690	143.112011590225	1.29255923400332	0.380306038411648	3.3987344492391	0.000676984122019579	0.0157026137841952
AT1TE43445	688.269229483798	-0.947094138822258	0.278665304990292	-3.39867978489554	0.000677119432302911	0.0157026137841952
AT3G59070	90.3489086723942	-1.40179962494253	0.412478109167525	-3.39848247406799	0.000677608043652229	0.0157026137841952
AT3TE60475	247.959847640522	-1.04565889239702	0.307810819987308	-3.39708296297103	0.000681083146395342	0.0157446489305733
AT2G37620	97.8954513537842	1.50430239509647	0.443225951920773	3.39398536700613	0.000688833731351148	0.0158850756830807
AT1TE55090	197.435214715136	-1.20894837481148	0.356301448198487	-3.39304928712498	0.000691192005179365	0.0159007186820699
AT3TE64120	397.033812660418	-1.19413178780884	0.352003503803506	-3.39238608396189	0.000692867357638203	0.0159007186820699
AT3TE57265	1291.88156987287	-0.937546412976159	0.276423904374219	-3.39169803385355	0.000694609465608333	0.0159021944807628
AT1TE41500	565.5707583608	-0.946666068652605	0.279350526474577	-3.38881075543188	0.000701964385607846	0.0160318516790149
AT5TE57230	850.40282931389	-0.932004834871701	0.275312114432824	-3.38526634322555	0.000711092203643689	0.0162012786205165
AT5G56750	189.008699806424	1.2537003229945	0.370663096009286	3.3823176261472	0.000718769855876107	0.0163042688111466
AT1TE51745	900.781472874981	-0.976566462087129	0.288760155282411	-3.38192941173631	0.000719786377632011	0.0163042688111466
AT4TE18665	1218.25783396552	-0.92742191017316	0.274259165995098	-3.38155301686339	0.000720773225561344	0.0163042688111466
AT2TE17625	2144.20855603113	-0.949564597179748	0.280949617860921	-3.37983943316774	0.000725281879400486	0.0163671944118043
AT4TE16910	3462.04777630645	-0.935379641292139	0.276832170875016	-3.37886900332275	0.000727846808155837	0.0163860618710238
AT5TE40575	4619.39507914541	-0.895637542294803	0.265355688043651	-3.3752340072223	0.000737529493341971	0.0165647026964341
AT1TE47725	2861.78134534197	-0.891752035559802	0.264280034289352	-3.37426941069431	0.000740118940524188	0.0165827623549169
AT3TE54780	2140.0006229568	-0.955339438305237	0.283178259811705	-3.37363270379751	0.000741832795788644	0.0165827623549169
AT3TE08230	167.71427440416	-1.1753241813827	0.349446668098677	-3.36338642968778	0.00076992508053889	0.0171464106964033
AT3TE61640	3868.38623110671	-0.897653124989807	0.266910745500954	-3.36312096879067	0.000770665853204031	0.0171464106964033
AT5TE62540	243.426550467784	-1.0922260323718	0.325084437623891	-3.35982257519031	0.000779925426066344	0.0173117873261284
AT3TE61610	579.741909725244	-1.07037851586268	0.318972755669425	-3.35570514044776	0.000791629212963302	0.0175305179450144
AT5TE39005	320.123211589228	-1.02303358350891	0.304984918217498	-3.35437433919058	0.000795446729405435	0.0175488785471311
AT1TE46685	2729.55512755646	-0.904810236952856	0.269787402718727	-3.35378979090506	0.000797128950383716	0.0175488785471311
AT4G30440	96.283425516755	1.47709385974545	0.440532159314437	3.35297623230079	0.000799475716083846	0.0175488785471311
AT5TE48920	502.69337939574	-1.02978715350881	0.307138616715794	-3.35284167298866	0.000799864479042058	0.0175488785471311
AT1TE52945	282.657040868372	-1.06597615753664	0.318119306671494	-3.35086910848019	0.000805583701044597	0.0176099048958861
AT2TE18715	975.834385317428	-0.939167561535762	0.280298181849705	-3.35060168902323	0.000806361967167604	0.0176099048958861
AT3TE54705	4280.87990927315	-0.913916209084721	0.273217778758321	-3.34501002547546	0.000822795961790109	0.0179274945421762
AT2TE12140	1070.02203388452	-0.920736119592155	0.275485946303779	-3.34222537282122	0.000831095506854204	0.0180259096963902
AT5TE51225	903.561964291529	0.986969342041784	0.295367096760918	3.34150063722459	0.000833268252390101	0.0180259096963902
AT5TE40180	3077.28307714565	-0.89608280710657	0.26824159438729	-3.34058112483777	0.000836032519212795	0.0180259096963902
AT5TE52400	542.061795432588	-0.96980015415267	0.290341898667686	-3.3402004967346	0.000837179262631658	0.0180259096963902
AT2TE13390	907.17387800138	-0.908302551756185	0.271983928095514	-3.33954494339537	0.000839157712429718	0.0180259096963902
AT1TE43805	833.809317870965	-0.948781596873429	0.284110761745537	-3.33947785379282	0.000839360432246962	0.0180259096963902
AT5G07430	629.546077049149	-1.0555346091974	0.316117350365657	-3.339059396697	0.000840625879489814	0.0180259096963902
AT4TE14535	1805.02597626139	-0.896985838250743	0.269069991719312	-3.33365245421518	0.000857136842900826	0.0183384717765554
AT5TE54735	138.363309602391	-1.19196477623339	0.357629953094949	-3.33295565966458	0.000859286356296208	0.0183430542454402
AT4G05050	122.036145485114	1.36324128119215	0.409332756102586	3.33039870586487	0.000867217100522198	0.0184707498398863
AT1TE47765	2321.17314194006	-0.876504894534224	0.263386809804939	-3.32782380098439	0.000875272063631667	0.0185821902414715
AT5G38190	608.671025926233	-1.00507277533898	0.302052745593867	-3.32747438982189	0.000876370440803729	0.0185821902414715
AT1TE47050	3963.31948028784	-0.898229265019092	0.270377211491424	-3.32213377031438	0.000893318552928822	0.0188992706354004
AT4TE09020	598.284607995244	-0.941440581687783	0.283513061109173	-3.32062508162635	0.000898161023732528	0.0189593990711289
AT3TE57600	2756.4323651751	-0.862693185408809	0.25993698986558	-3.31885502657751	0.000903873421548265	0.019025508474126
AT4TE31215	824.025016903872	0.892492572065913	0.26895168323002	3.31841229378963	0.000905307482784427	0.019025508474126
AT1TE46835	984.281647262579	-0.922729602536661	0.278264059284093	-3.31602149738858	0.000913088047143961	0.0191130653115594
AT5TE42670	2663.04253200635	-0.888457644844698	0.267939151907344	-3.31589332324204	0.000913506919828699	0.0191130653115594
AT5TE55145	492.130079578514	-0.99237963056735	0.299355409352543	-3.31505494660579	0.000916251126477711	0.0191153023768028
AT1TE45670	450.409007381277	-0.956854673173615	0.288676229225578	-3.31462925000973	0.000917647455311805	0.0191153023768028
AT3TE50670	4449.47851160737	-0.915476909643561	0.276439542945208	-3.31167133287083	0.000927404313952059	0.0191794310657848
AT4TE18065	4478.02495187235	-0.899416073765253	0.271606470625344	-3.31146777061108	0.00092807929822978	0.0191794310657848
AT2TE20215	58.5471902212645	-1.57935425002965	0.47699791545335	-3.31102966881646	0.000929533527394171	0.0191794310657848
AT3G44580	5390.25093793749	-0.94812840859101	0.286377453343247	-3.31076485778578	0.000930413560996515	0.0191794310657848
AT4TE50445	284.843072089687	-1.02969389318633	0.311026057434693	-3.31063545504557	0.000930843879537983	0.0191794310657848
AT4TE14030	597.205497589117	-0.927085618755065	0.280117122617275	-3.30963566272864	0.000934174830799433	0.0192063102956985
AT5TE43840	61.3465103044074	-1.52002847039344	0.4595968121814	-3.30730855851431	0.000941970723244284	0.0193246721101933
AT5TE64330	96.0764578701613	-1.23972250405858	0.375026822194866	-3.3056902351758	0.00094742765409602	0.0193290025708099
AT4TE15840	636.419169271451	-0.927004975101232	0.280435146304891	-3.3055948489901	0.000947750205135625	0.0193290025708099
AT4TE15055	435.273412498776	-0.989440842930893	0.299337796916102	-3.30543236812895	0.000948299872908483	0.0193290025708099
AT5TE45100	357.18197795866	-1.05084082533305	0.318152724544595	-3.30294460573056	0.000956752855736992	0.0194520286264587
AT3G52600	394.914841256725	1.26933948315806	0.384362919720738	3.30245041347982	0.000958440321645517	0.0194520286264587
AT2TE21760	2182.9319193343	-0.903539322391503	0.273747979936315	-3.30062462050571	0.000964698597423879	0.0195372079196229
AT5TE43995	745.862846410277	-1.00280916872218	0.303991802046981	-3.29880332946346	0.000970979129787269	0.0196224737571935
AT4TE39815	503.897755808838	-1.03558446820012	0.314024520653185	-3.29778217970386	0.000974517003907825	0.0196520684319965
AT3TE60510	3806.35106063454	-0.879804979929803	0.266931585099433	-3.29599428858175	0.000980740090422262	0.0197241657644653
AT5TE42380	336.897058202676	-1.1262855205149	0.341816302290802	-3.29500235350596	0.00098420855536665	0.0197241657644653
AT1TE44615	599.636962189503	-0.999316810338147	0.303285910531124	-3.29496615450454	0.000984335345705009	0.0197241657644653
AT2TE14290	522.539824537756	1.12191825152187	0.340627200873053	3.29368367718816	0.000988837112256938	0.0197589664274753
AT2TE06235	409.155316195502	-0.934841667391734	0.283862998310185	-3.29328469352038	0.000990241512244227	0.0197589664274753
AT1TE53545	196.349471927691	-1.04326341302376	0.317050785657656	-3.29052461062262	0.00100000753840309	0.019911914808791
AT3G55430	488.52789812821	1.258367637562	0.382881931913631	3.28656834568483	0.00101416160167951	0.0201514122866214
AT1TE48905	3237.06112550117	-0.877975258151751	0.267286122265389	-3.28477681785517	0.00102063183306665	0.0202375491920622
AT5TE53870	166.761300885114	-1.19803615907254	0.36543716593226	-3.27836430105913	0.00104410551380313	0.020644038164453
AT4TE14020	126.333541611426	-1.20866971998844	0.368785599428669	-3.27743198720596	0.001047559643017	0.020644038164453
AT3G59884	401.500394481871	-1.30788859232137	0.399062461348808	-3.2774032112687	0.00104766642299028	0.020644038164453
AT4TE15400	626.823089307562	-0.960143378528976	0.293217923642792	-3.27450439113897	0.00105847494050795	0.0208137458218556
AT2G22940	379.095631574783	-0.966954189035096	0.295361343272703	-3.27380075645959	0.00106111402113653	0.0208224403567951
AT2TE19420	820.605967622909	-0.953778062314182	0.291741305328293	-3.26925959709719	0.00107829322819254	0.0210875092993392
AT4TE20945	1116.60569602988	-0.921054016875338	0.281769584039401	-3.26881987640846	0.00107997028113511	0.0210875092993392
AT4TE48180	192.275644081727	-1.21295717237749	0.371108262927669	-3.26847255517428	0.0010812966363662	0.0210875092993392
AT5TE43235	1741.57406376154	-0.905462882760385	0.27721914742717	-3.26623500275451	0.00108987761687198	0.021190235301028
AT3G05150	107.010392031288	1.45216285753936	0.444716772911951	3.26536561243414	0.00109322867217485	0.021190235301028
AT4TE20645	540.417742461337	-1.03513874130716	0.317006535324782	-3.26535457777435	0.00109327126632229	0.021190235301028
AT4TE18370	145.453378423795	-1.21770606326227	0.373051667241797	-3.26417536816154	0.00109783190974933	0.0212352057971513
AT3TE55330	2988.36473452091	-0.875671039445586	0.268376882264622	-3.26284079335181	0.00110301465502805	0.0212920018337187
AT3TE54580	1834.77145560394	-0.871749610505464	0.267314778834802	-3.26113510934687	0.00110967151970069	0.0213575925947047
AT2TE24420	163.405384833339	-1.17204437877104	0.359454350823306	-3.26062092748787	0.00111168552019982	0.0213575925947047
AT5TE69820	739.746804637305	-0.879223207302648	0.269694684951065	-3.26006872349812	0.00111385221333372	0.0213575925947047
AT2TE17380	450.196258926767	-1.37676277685188	0.422362853883996	-3.25966823121717	0.00111542607452826	0.0213575925947047
AT4TE15800	1888.30884804249	-0.901308864388004	0.276976302885301	-3.25410100069552	0.0011375182909736	0.0217366902456608
AT4G25900	81.5262527734698	1.5952994499228	0.490489542407712	3.25246373672271	0.0011440919358272	0.0218183166353525
AT1TE45175	8079.88359861352	-0.8756356998573	0.269327704539838	-3.25119059457093	0.00114922787434482	0.0218722525964662
AT1G55591	10541.0960006268	1.11884330676905	0.344576208953084	3.24701264248161	0.00116623209196952	0.0221513983320382
AT4TE21085	655.636965816719	-0.920220306545948	0.283536617001633	-3.24550781580584	0.0011724134612578	0.0222242695716028
AT5G17340	80.6947630959658	-1.45901561952464	0.449929341669856	-3.24276610658396	0.00118375345932069	0.0223254958331344
AT2G23834	92.6227984188992	1.38027318637182	0.42564746586259	3.2427614330433	0.00118377287580572	0.0223254958331344
AT2TE21490	571.476899316721	-1.06042376445626	0.327037983887469	-3.24250948422292	0.00118482004685235	0.0223254958331344
AT4TE22570	1743.78800088871	-0.930855189089611	0.287187103198488	-3.2412847886357	0.00118992243304874	0.0223771524214998
AT3G19310	95.5299845329804	1.22150232280913	0.377166715171743	3.23862704123537	0.00120106517654176	0.0225419717688373
AT1TE46860	101.051857367411	-1.24115097694415	0.383419400133945	-3.23705836614048	0.00120768708480879	0.0226214588731576
AT1TE47720	6233.31269793735	-0.842252427358818	0.260340069395686	-3.23520090208894	0.00121557167249361	0.022683860880522
AT2G39770	62.5690430988514	-1.6323476301043	0.504566902631983	-3.23514606604089	0.00121580516219721	0.022683860880522
AT3G27470	59.8473555364819	-1.50171998996144	0.464481470562427	-3.23311065163278	0.00122450123808964	0.0226963331787144
AT4TE19140	137.413943149487	-1.1250349407672	0.347979438666763	-3.23305004766265	0.00122476104015621	0.0226963331787144
AT5TE42985	3084.54696374335	-0.849510852144667	0.262764384094736	-3.23297563736182	0.00122508009796109	0.0226963331787144
AT3TE67770	515.089268988273	-0.944240822828437	0.292110524724936	-3.23247792498259	0.00122721617263989	0.0226963331787144
AT2TE20735	1142.82665520088	-0.894027762355977	0.276601107985263	-3.23219154423492	0.00122844681585572	0.0226963331787144
AT3TE60635	277.722556173518	-1.04766560533891	0.324291696894337	-3.23062728824744	0.00123518891811967	0.0227764991555218
AT2TE18895	2824.22967386175	-0.864436725313075	0.267658118900204	-3.22963012990231	0.00123950458938743	0.0228116980547846
AT5TE49150	1362.86910127738	-0.898122542261413	0.278853108496135	-3.22077292630884	0.00127845398687901	0.0233831467105978
AT2TE12040	672.374373168348	-0.938634622903083	0.291437696077109	-3.22070423811866	0.00127876040871477	0.0233831467105978
AT3G45560	539.1301943895	-0.933516442694668	0.289964962879575	-3.21941117790278	0.00128454148819743	0.0233831467105978
AT2TE21060	566.523597773414	-0.989994577468464	0.307598892770473	-3.21845949623489	0.00128881171629705	0.0233831467105978
AT1TE47305	1680.50313173393	-0.888529061802853	0.276079846946969	-3.21837711672423	0.0012891819714906	0.0233831467105978
AT1TE47525	1680.50313173393	-0.888529061802853	0.276079846946969	-3.21837711672423	0.0012891819714906	0.0233831467105978
AT2TE11230	581.082444453412	-0.966682878139617	0.300402109033623	-3.21796302046408	0.00129104461715678	0.0233831467105978
AT1G29140	289.945340074006	1.09415350724678	0.34001444918037	3.21796179510701	0.0012910501326175	0.0233831467105978
AT1TE49260	14416.3998685971	-0.846703985457101	0.263149123079423	-3.2175823941528	0.00129275890233733	0.0233831467105978
AT3TE52775	1342.99040877944	-0.900069995996634	0.279963101942038	-3.21495936340561	0.00130462989514619	0.0235449059253933
AT2TE12660	1298.61490476552	-1.02444853285364	0.318695009514889	-3.21451074622423	0.00130667023810476	0.0235449059253933
AT3TE52215	90.7895745290215	-1.22397584668238	0.381006944001835	-3.21247648094436	0.00131595922639756	0.0236672894645086
AT5TE42135	13867.1188532507	-0.861581719680948	0.268413059983462	-3.20990982977517	0.00132776616934686	0.0238344086232378
AT5TE42710	11792.0100618863	-0.85067621382989	0.265135407402862	-3.20845948929531	0.00133448107644166	0.0238706910825327
AT2TE49855	116.081060400943	-1.16917081404833	0.364410951576302	-3.20838550266106	0.00133482446441679	0.0238706910825327
AT4TE09050	95.3992466816165	-1.36279964860049	0.425137105637169	-3.20555329217386	0.00134803081962852	0.0240504310990095
AT4G15200	78.3857299542559	1.28365658779795	0.400498910801736	3.20514376737822	0.00134995034233732	0.0240504310990095
AT5TE43835	745.330579434392	-0.880345527264884	0.275002883034987	-3.20122290191729	0.00136845625955707	0.0243343872947127
AT3TE49415	719.12776948123	-0.990432843414207	0.309564841166008	-3.19943582638015	0.00137696838476696	0.0244398995333731
AT5TE40265	258.438682162416	-1.0025652190494	0.313426880409426	-3.19872123839461	0.00138038572742418	0.0244547587374325
AT4TE16295	393.414329090182	-0.983934684511717	0.307659230680474	-3.19813152472453	0.0013832117781566	0.0244591067786721
AT4TE17520	1326.85167213312	-0.849825487053802	0.265933063857692	-3.19563680696946	0.00139522619978923	0.0245661048605206
AT2TE38255	109.856278180712	-1.30216616713203	0.407592025986926	-3.19477831780201	0.00139938284084271	0.0245661048605206
AT5TE24050	109.856278180712	-1.30216616713203	0.407592025986926	-3.19477831780201	0.00139938284084271	0.0245661048605206
AT3TE56740	2032.66843231611	-0.914998237761476	0.286408873325825	-3.1947272692231	0.00139963036765996	0.0245661048605206
AT1G66725	628.178484165929	1.1279632981498	0.353132796753228	3.19416182388187	0.00140237482790809	0.0245687774841273
AT1TE15445	826.811325006076	-0.968316502753733	0.303258931187344	-3.19303540035079	0.00140785686060204	0.0246193124073545
AT4TE16570	6784.04176195411	-0.855803382249132	0.268133545536851	-3.19170576190183	0.00141435331598316	0.0246873678248406
AT4TE14305	2564.61828760202	-0.844600194090158	0.264685032636096	-3.19096318246058	0.00141799348771003	0.0247054085965361
AT1TE50850	207.816066852086	-1.03621379211228	0.324824633519083	-3.19007145759284	0.00142237619312148	0.0247362964374411
AT2TE58010	361.070087379339	-0.93056145795553	0.291822350869008	-3.18879433047003	0.00142867485100944	0.0247751094649382
AT4G08116	197.81624554047	-1.11947901764138	0.351092405832268	-3.18855947620867	0.00142983592290791	0.0247751094649382
AT2TE15520	573.334087181138	-0.950106727266806	0.29804556390217	-3.18779019834252	0.00143364517060743	0.024795782713535
AT5TE50235	1016.64129958384	-0.840334538877676	0.263955402104277	-3.1836231885328	0.00145444210693031	0.0250700063055854
AT1TE52175	792.482564305154	-0.958009952423341	0.300924687192733	-3.18355386977528	0.00145479040600042	0.0250700063055854
AT4TE13820	407.739892909468	-0.937039044987761	0.294554170325959	-3.18121126565893	0.00146660634981978	0.0252277585909109
AT4TE09385	3894.89348782812	-0.93889992921816	0.295233836398231	-3.18019079612443	0.00147178113406885	0.0252709086751894
AT1TE47320	1162.7988106795	-0.840847089915052	0.264544071151189	-3.17847641134433	0.00148051264341933	0.0253577704129055
AT3TE57520	468.963165469572	-0.961798810564519	0.302628706567768	-3.17814797370898	0.00148219084287293	0.0253577704129055
AT2TE18015	2293.80564027491	-0.844944493280656	0.265933354934786	-3.17727910997798	0.00148663888291071	0.0253880420400499
AT1TE52120	273.416310428505	-0.948054963337008	0.298459427070708	-3.17649528661865	0.00149066211842314	0.0253931706685854
AT1TE47220	974.975312945396	-0.909673879183898	0.286452195012912	-3.17565686359252	0.00149497670743518	0.0253931706685854
AT1TE47440	974.975312945396	-0.909673879183898	0.286452195012912	-3.17565686359252	0.00149497670743518	0.0253931706685854
AT1TE46790	1449.61951153536	-0.860412118516774	0.271051034284726	-3.17435467747727	0.00150170067388345	0.0254617513185462
AT2TE20685	442.59621408648	-0.930155428754697	0.29321525492552	-3.17226137838894	0.00151256804685351	0.0256002141929956
AT3TE57490	867.152230036998	-0.881829590922864	0.278036794927026	-3.17162910453745	0.00151586471761966	0.025605837620911
AT3TE57705	1484.05660812462	-0.897313070068801	0.282969916742893	-3.17105464919121	0.0015188656603714	0.025605837620911
AT1TE52320	178.380900526482	-1.13549224200017	0.358126493796764	-3.17064574017401	0.00152100512561436	0.025605837620911
AT5TE24025	109.651740318287	-1.29160912454199	0.40753425941114	-3.16932649149124	0.00152792654588562	0.0256767514218155
AT3TE55425	2070.18634865529	-0.881694252329504	0.278308813543281	-3.1680428697325	0.00153468888481634	0.0256889607751982
AT2TE21460	596.879152400726	-1.04268491012504	0.329153441792404	-3.16777763114706	0.00153608963892378	0.0256889607751982
AT5TE81385	1431.85929603272	-1.00938513109281	0.318654631683046	-3.16764619350271	0.00153678421181023	0.0256889607751982
AT3TE54575	1942.95127012426	-0.847817500557872	0.267769331641919	-3.1662233137723	0.0015443218554484	0.0257695115245422
AT4G17870	65.4819902613818	-1.40496601037795	0.443930560459687	-3.1648328263842	0.00155172078249817	0.025847468500031
AT1G49270	211.570340721497	-1.33094610226976	0.420674686545865	-3.16383691445303	0.00155704018116767	0.0258905733984336
AT3TE90570	204.957166976789	-1.08578831058095	0.343369960165621	-3.16215288622578	0.00156607318803367	0.0259951693103032
AT1TE47710	1262.73485723969	-0.874553785967645	0.27674566525403	-3.16013544481311	0.00157695811859067	0.0261300857482558
AT3TE62700	1316.33465148325	-0.883499740861434	0.279656511016714	-3.15923179349338	0.0015818562424413	0.026159844202125
AT4TE15215	671.155061362236	-0.937447319759533	0.296774496117519	-3.15878666133196	0.00158427416881407	0.026159844202125
AT5TE42340	59.8291117831811	-1.55976769619072	0.494172724504098	-3.15632089520106	0.0015977297749228	0.0262285317063907
AT3TE55255	622.266063537817	-0.938132556057501	0.297236414696331	-3.15618312452037	0.00159848467932932	0.0262285317063907
AT1TE45165	455.87099274183	-0.989051758234137	0.313374104240368	-3.15613748823197	0.00159873481243173	0.0262285317063907
AT4TE15295	1745.10100231082	-0.878456790559833	0.278345225395031	-3.15599733860395	0.00159950319965118	0.0262285317063907
AT3TE63035	1353.65220881408	-0.883252734666599	0.279941479842021	-3.15513347705758	0.00160424693518694	0.0262608850633882
AT2TE11375	844.252221640917	-0.975044779780554	0.309207402101738	-3.15336817020873	0.0016139810867959	0.0263746771390543
AT4TE13290	3799.17756044332	-0.858650012337184	0.272371012171096	-3.15250145561674	0.00161878014500504	0.0263790006229386
AT1TE46830	1052.53390211511	-0.867386994612392	0.275158695381715	-3.15231540623895	0.00161981202390275	0.0263790006229386
AT1TE45790	3753.47495508114	-0.838691222536659	0.266107195128482	-3.15170441795729	0.00162320498602889	0.0263889139924217
AT5TE44735	1179.03771428334	-0.865547735377383	0.274835921518405	-3.1493253523609	0.00163647891408156	0.0265339327650286
AT5TE42940	978.894521394642	-0.859901696051899	0.273062417936166	-3.14910306057906	0.0016377242738491	0.0265339327650286
AT5TE41355	748.440063045923	-0.851888096010774	0.270663014630712	-3.14741228007482	0.0016472252264522	0.0266423220073617
AT2TE22245	2348.5661634489	-0.882051603212424	0.280312024920782	-3.14667771909427	0.00165136870534901	0.0266638374604735
AT3TE47430	775.910848631866	-0.923089465090391	0.293479888416677	-3.14532443797242	0.00165902735219731	0.026741940891371
AT4TE15785	732.976134908083	-0.863764429026193	0.274951539403725	-3.14151515899639	0.00168076107732068	0.0269221753119002
AT1TE52170	831.559571614477	-0.94971041079423	0.302315666930638	-3.14145284111964	0.00168111879762112	0.0269221753119002
AT3TE57870	861.784448037739	-0.884948205689348	0.281707358528247	-3.14137412069275	0.00168157077280491	0.0269221753119002
AT3TE57965	861.784448037739	-0.884948205689348	0.281707358528247	-3.14137412069275	0.00168157077280491	0.0269221753119002
AT3G43150	89.595893344387	-1.28310148833262	0.408780112299859	-3.13885497294302	0.00169609368037745	0.0271088969690008
AT3TE62020	4108.43643645856	-0.836162701955646	0.266443469122695	-3.13823680763817	0.00169967499354885	0.0271204033482424
AT3TE47035	251.911865889391	-0.935687103783832	0.298277290275896	-3.13697064539628	0.00170703217138827	0.0271920183536437
AT1TE11380	279.816880077295	-1.02165074646484	0.325827880338529	-3.13555348733007	0.0017153014584346	0.0272778980252401
AT5TE65910	225.467442003571	1.55272722798605	0.495344990829648	3.13463799318007	0.00172066304686178	0.0273173272330921
AT5TE45115	1121.89142217516	-0.862628210812734	0.275354424284083	-3.13279226602424	0.00173151943031652	0.0274307481165535
AT5TE47485	1076.56004922286	-0.870125358412293	0.277808342553881	-3.13210665458519	0.00173556814739888	0.0274307481165535
AT3G04700	834.146316648699	0.997161667865088	0.318383565834089	3.13195081301625	0.00173648964654274	0.0274307481165535
AT1G48410	347.384106329951	-1.12081894853533	0.358094093614533	-3.12995653522793	0.00174832169598726	0.0275717022205777
AT3TE59105	2967.04863345272	-0.839717189282872	0.268402559209417	-3.12857370569145	0.00175656949450626	0.027627308512819
AT1TE40605	299.627792534494	1.02870139040651	0.328844921641799	3.12822647608663	0.0017586461348607	0.027627308512819
AT2TE17795	2708.49165195593	-0.842127731957213	0.269267489189497	-3.12747645284636	0.00176313942702458	0.027627308512819
AT5TE40455	1997.26327192557	-0.860318303962896	0.27508925644359	-3.12741513458311	0.00176350724311621	0.027627308512819
AT5TE41070	13166.7607363705	-0.83219536361943	0.266241604946119	-3.12571494521995	0.00177373392467324	0.0277179993884213
AT2TE17455	392.353611378595	-0.928749602534416	0.297154131208225	-3.12548103826837	0.00177514513914029	0.0277179993884213
AT5TE47115	11762.0009201174	-0.824291460819297	0.263983761281497	-3.12250820587529	0.00179317106628708	0.0279339944604318
AT5TE42440	13041.7725464026	-0.840384458220024	0.269173167381532	-3.12209595924858	0.00179568398607874	0.0279339944604318
AT2TE22505	6790.74998423688	-0.835552753468513	0.267655586873078	-3.12174598419548	0.00179781985871106	0.0279339944604318
AT5TE43765	615.893636282089	-0.934601127193937	0.299459855962882	-3.12095631045044	0.00180264776194935	0.0279631677377348
AT1TE48045	324.420934291829	-0.920032471036957	0.294842470898455	-3.12042043411656	0.00180593078351555	0.0279683202061444
AT3TE51300	2302.25617879542	-0.843728825240601	0.270468402135157	-3.11950977851741	0.00181152247926675	0.0280091518083039
AT2TE11560	3399.38712038022	-0.830598151973855	0.2664177664174	-3.11765301219644	0.00182297290209584	0.0280970353463483
AT5TE41550	608.723445335522	-0.965219533283461	0.30960073509016	-3.1176267491819	0.00182313533846848	0.0280970353463483
AT5TE42345	301.732156895815	-0.948742617040527	0.304390527017329	-3.11685986530886	0.0018278843729411	0.0281244936472983
AT1G60073	19899.3100896122	0.950395264947365	0.304981181643168	3.1162423196961	0.00183171686922566	0.0281377836086237
AT1G78206	1857.54705127532	1.08741880054458	0.34923119358728	3.11375049111358	0.00184725631510507	0.0282901416560327
AT4TE15365	219.392616370057	-1.07526801938882	0.345335067896813	-3.11369484117992	0.00184760473571262	0.0282901416560327
AT4TE26020	164.051724021389	-1.01793137515365	0.32704332836409	-3.11252756705194	0.00185492689274131	0.0283564469183906
AT1TE37905	405.837012328323	-0.902188357555724	0.290312472515393	-3.10764587459427	0.00188583890353388	0.0287825783054656
AT1G63630	2466.17743256373	-0.946957669024404	0.305258994022145	-3.10214502297582	0.00192123812637183	0.0291127711839125
AT1G30270	171.41057634318	1.43505284777227	0.462600766471147	3.10214109397022	0.00192126362703644	0.0291127711839125
AT3TE63940	729.760849380409	-0.839668776030945	0.270768195573527	-3.10106131280449	0.00192828358850316	0.0291127711839125
AT2G36880	80.4947559694642	1.40069272793734	0.451716320127032	3.10082382576622	0.00192983071494972	0.0291127711839125
AT2G07751	175.701576856394	1.09160341315453	0.352043252024437	3.10076505337691	0.0019302137678209	0.0291127711839125
AT4TE17505	1508.88820562784	-0.837917030066812	0.270250221704217	-3.10052300709634	0.00193179205613953	0.0291127711839125
AT3TE60425	534.844377944692	-0.937790213979589	0.302526551051441	-3.09986085756859	0.00193611572882253	0.0291127711839125
AT5TE35810	111.153479502671	-1.18286294728211	0.381616080389283	-3.09961505310648	0.00193772303134752	0.0291127711839125
AT5TE41050	741.091243582346	-0.904717797442218	0.291912602102795	-3.09927625914426	0.00193994039543494	0.0291127711839125
AT5TE38650	3076.73325914638	-0.84139899668884	0.27153055021457	-3.09872681370088	0.00194354140045598	0.0291127711839125
AT1TE47235	1280.81472704518	-0.869740221624073	0.280741325592537	-3.09801280516286	0.00194823010352137	0.0291127711839125
AT1TE47455	1280.81472704518	-0.869740221624073	0.280741325592537	-3.09801280516286	0.00194823010352137	0.0291127711839125
AT1G55570	678.347709196455	1.16397892893919	0.375736717634238	3.0978578198798	0.00194924922118784	0.0291127711839125
AT2TE11935	890.92433598196	-0.911996557005306	0.294455802896567	-3.09722731912218	0.0019534001750818	0.0291127711839125
AT1TE42445	96.4319483412757	-1.2523302381794	0.404342059357342	-3.09720497583122	0.00195354742276518	0.0291127711839125
AT1TE51990	3426.34587507631	-0.826467777867902	0.266886646414528	-3.09669962499447	0.00195688052968364	0.029116661947161
AT1TE70805	720.52427709099	-0.847928286510813	0.274338319267926	-3.09081242741997	0.00199609685884007	0.0296536144640849
AT4G03438	99.6632734772267	1.41720365817591	0.458866477352823	3.08848810737208	0.00201177745455754	0.0297428883100967
AT3TE55395	7969.85040558238	-0.826667136266636	0.267662755481927	-3.08846531441486	0.00201193178118659	0.0297428883100967
AT5TE42130	281.641713506038	-0.92606253401662	0.299897986920451	-3.0879251425661	0.00201559235968235	0.0297428883100967
AT3TE50605	672.442290925562	-0.890771836066155	0.28849907663427	-3.0876072341659	0.00201774958313862	0.0297428883100967
AT3G50250	168.804877456146	-1.06442725569381	0.344775965910677	-3.08730120698024	0.0020198281857336	0.0297428883100967
AT2TE11330	3278.35631958251	-0.846295266638701	0.274135836132025	-3.08713840036266	0.00202093480393567	0.0297428883100967
AT4TE68040	844.496589551456	-0.831405276709621	0.269371292389308	-3.08646578235975	0.00202551257767851	0.0297640437383518
AT2TE21055	1048.52970282127	-0.875339719130777	0.284466566156103	-3.07712688685681	0.00209006311698887	0.0306650436885766
AT3TE48180	1000.45743186397	-0.819925644672326	0.266587204814369	-3.07563765201432	0.0021005294448543	0.0307124250378224
AT2TE17730	1812.85294623336	-0.83036512108998	0.270008166493804	-3.07533335703398	0.00210267393257013	0.0307124250378224
AT3G01230	185.601545752813	1.19471288833668	0.388488488629808	3.07528517138413	0.00210301370009989	0.0307124250378224
AT3TE59180	3052.74842460112	-0.834413738348546	0.271571903821213	-3.07253337553606	0.00212250096588472	0.0309427916411782
AT4TE17470	5010.57151466659	-0.804686893928446	0.261930616056707	-3.07213759904353	0.00212531729884016	0.0309427916411782
AT1TE54260	81.3883923155098	-1.33214527279583	0.433837929329258	-3.07060582474985	0.00213624968276788	0.031028983859418
AT1TE39880	129.929559985239	-1.05113547834057	0.342345773864807	-3.07039127860146	0.00213778502428782	0.031028983859418
AT2TE16560	1458.39052065412	-0.884600696967965	0.288156985787892	-3.06985685094272	0.00214161391158701	0.0310370285229689
AT3TE50260	739.67033621233	-0.834832442457998	0.272008835233614	-3.06913722762353	0.0021467795603349	0.0310635347080081
AT1G54510	610.177670460135	1.18387472831937	0.385791605647007	3.06868970446857	0.00214999775991278	0.0310635347080081
AT5TE43205	107.439069514508	-1.23562527376244	0.402767755799483	-3.06783563473139	0.00215615176958243	0.031105032682043
AT2G34840	130.011580483542	1.56491640569686	0.51083481610356	3.06344899831496	0.00218801497773031	0.0315167263813494
AT5TE42190	13662.3871690047	-0.809472994469272	0.264428411158237	-3.06121793389619	0.0022043858115273	0.0317043531436355
AT5TE47000	397.390263054984	-0.94023499190404	0.307270070110928	-3.05996282542131	0.00221364466052408	0.0317892789279504
AT4TE06430	122.913506915584	1.57302098295054	0.514248792810708	3.05887151305295	0.00222172414940444	0.031819865141783
AT1TE31770	288.543219753094	-0.93132697944166	0.304482087145092	-3.05872502443095	0.00222281072705894	0.031819865141783
AT2TE27460	243.216485360145	-1.03136978555961	0.337234523776464	-3.05831613563757	0.00222584623222221	0.031819865141783
AT1TE62585	2433.22766440475	-0.799467836846143	0.261627322300387	-3.05575056082344	0.00224497938009657	0.0320359366188981
AT5TE55160	213.861583605446	-0.97703629963403	0.319829116213996	-3.05486977295807	0.00225158265429913	0.0320359366188981
AT3G29080	136.819944210612	-1.08004282441279	0.353590600253575	-3.05450095007686	0.00225435300494101	0.0320359366188981
AT1TE55540	137.083361006626	-1.07146775753606	0.350785199652551	-3.05448393660092	0.00225448087410899	0.0320359366188981
AT2TE22185	1001.19692851965	-0.846141233482124	0.277114671995226	-3.05339745236117	0.00226266040228092	0.0320699924483284
AT3TE52370	1649.15391383272	-0.845522108203435	0.276923742215152	-3.05326694432187	0.0022636447507841	0.0320699924483284
AT1TE42150	166.481885761996	-1.17790834168036	0.385886653471303	-3.05247235447069	0.00226964636452088	0.0320981462259863
AT3TE65970	305.426146512649	-0.953363066836711	0.312421339067857	-3.05152992968142	0.00227678348632486	0.0320981462259863
AT5TE43825	3645.2984115468	-0.803665106851676	0.26340503054078	-3.05106210462922	0.00228033402537451	0.0320981462259863
AT3TE47625	366.019894633006	-0.88925184220561	0.291514476538971	-3.05045517040294	0.00228494788653863	0.0320981462259863
AT4TE39295	187.080824853999	1.29828583089115	0.425667693878505	3.04999850719636	0.00228842503652477	0.0320981462259863
AT4TE19075	871.26498115729	-0.850665942868078	0.27893041664914	-3.04974248806328	0.00229037655119324	0.0320981462259863
AT5TE41865	5949.7368697878	-0.80853052058916	0.26512006260281	-3.04967686206555	0.00229087703302663	0.0320981462259863
AT5TE40260	1098.95576067034	-0.853593193782	0.279927961653443	-3.04933165211543	0.00229351134849661	0.0320981462259863
AT3TE44730	704.487113710255	-0.880273747334043	0.288723253191293	-3.04884950416799	0.00229719528934798	0.0320981462259863
AT1TE51595	442.320596619726	-0.877864069545281	0.287961326430044	-3.04854849930185	0.00229949792017774	0.0320981462259863
AT4TE13465	905.811533761034	-0.844357842940605	0.277147436135078	-3.04660167424055	0.00231444189433773	0.0322267592939035
AT1G12680	61.7006685507942	-1.57239838591692	0.516146663341534	-3.04641780639869	0.00231585786476287	0.0322267592939035
AT3TE59185	1557.02367518609	-0.838405308075616	0.275246020556901	-3.0460215423979	0.0023189122007219	0.0322267592939035
AT1TE45475	3275.25537575136	-0.809236378999793	0.265762422396205	-3.04496163040448	0.00232709996347038	0.0322926763522663
AT5TE43670	1139.00870200482	-0.868351795020783	0.285217361993279	-3.04452642346943	0.00233046957427201	0.0322926763522663
AT1TE50400	220.730365134619	-0.971499512330578	0.319400308191237	-3.04163611435498	0.00235296154644886	0.0325567438499887
AT1TE50315	887.142092220696	-0.821921444833775	0.27036096793485	-3.04008914863715	0.00236508130898548	0.0326291712468185
AT1TE50775	887.142092220696	-0.821921444833775	0.27036096793485	-3.04008914863715	0.00236508130898548	0.0326291712468185
AT1TE39225	463.517195650177	-1.03945749529345	0.342069417522468	-3.03873261404662	0.00237575613924033	0.0326528139255219
AT2TE21420	2418.50434391099	-0.809963668061142	0.266574126045697	-3.03841816936988	0.00237823685375085	0.0326528139255219
AT1TE44775	124.309143087933	-1.14188562497614	0.375839324229036	-3.03822817720979	0.0023797368875126	0.0326528139255219
AT2TE21765	1349.96507326959	-0.825440346730081	0.27171363147839	-3.0379055413557	0.00238228615960089	0.0326528139255219
AT3TE59170	3150.84839921833	-0.823466747216991	0.27108354514613	-3.03768621136002	0.00238402059890917	0.0326528139255219
AT5TE48020	947.686482107705	-0.851160583051923	0.280324797536214	-3.03633710086588	0.00239471467693107	0.0327113406661852
AT3G04710	847.610059487155	0.961679677045875	0.316729943921322	3.03627647307248	0.00239519628849257	0.0327113406661852
AT1TE48375	318.672311959365	-0.985328575371702	0.324724768502319	-3.03434992013757	0.00241054657989475	0.0328313296252545
AT3TE61075	872.820400196322	-0.851665087868687	0.280678852415792	-3.03430443917822	0.00241091004633648	0.0328313296252545
AT2TE16265	3257.34353772561	-0.817842858258877	0.269771954623734	-3.03160815734004	0.00243254755202217	0.0330784586772828
AT1TE50860	2924.23955165683	-0.820590031115248	0.270863266765238	-3.02953604936939	0.00244929671333496	0.0332585017893822
AT2TE81015	143.944774169505	-1.01758653128566	0.335938606791223	-3.029084811077	0.00245295810547	0.0332605678449852
AT1TE51050	3983.96094445516	-0.796304744515058	0.262983367939684	-3.02796618186779	0.00246205638221018	0.0333362434151258
AT1TE14750	114.193910807268	1.57652009735371	0.520765179109953	3.02731472954501	0.00246736913246775	0.0333605201676596
AT3TE44720	705.862240193582	-0.871702733574167	0.288154098060747	-3.02512697005059	0.00248528769512802	0.0334214086348176
AT4TE11950	256.820498902266	-0.953499737232736	0.315198033626774	-3.0250814900761	0.00248566145301758	0.0334214086348176
AT3TE57860	992.226342495596	-0.83836574226119	0.277148361043423	-3.02497095456335	0.00248657005665742	0.0334214086348176
AT1TE47035	5220.26019596337	-0.799637366339935	0.264375537515849	-3.02462691462896	0.00248940001538924	0.0334214086348176
AT1TE22850	1334.76981009854	-0.955081674892527	0.315794596894255	-3.02437623786306	0.00249146385492501	0.0334214086348176
AT1TE34455	155.105682525121	1.54384976240254	0.510500900336423	3.02418616967205	0.00249302974306985	0.0334214086348176
AT5TE47475	911.733505089588	-0.84348573231663	0.279041808819854	-3.02279337954397	0.00250453182892275	0.0335281817436862
AT1TE49845	6483.30516177527	-0.805932034014096	0.267047176205522	-3.0179387981764	0.00254500296853618	0.0340219155652834
AT1TE55795	418.025021544395	-1.00773557576534	0.333969244729327	-3.01745023432346	0.00254910892537364	0.0340288090066076
AT5TE43260	12610.5131317246	-0.791382652125488	0.262340633878295	-3.01662247447579	0.00255607936132798	0.0340738680543834
AT3TE51135	809.985868133981	-0.866199743197073	0.28718988010483	-3.0161220962274	0.00256030141709975	0.0340822146506621
AT4TE18695	1336.67771598776	-0.821341496694316	0.272363812576081	-3.01560434525378	0.00256467677199489	0.034092575659141
AT2G44560	358.309398890925	1.01427542860674	0.336406495714553	3.01502926229869	0.00256954463652173	0.0341037784302964
AT1TE44605	650.773004449797	-0.889837633287418	0.295170621602233	-3.01465514575007	0.00257271592927431	0.0341037784302964
AT3TE61175	391.478777493914	-0.927154836143659	0.307866387176356	-3.01154940832353	0.00259918099770242	0.0343831959255654
AT1TE46635	3087.32203151051	-0.897210348966324	0.297944761444566	-3.01133117634375	0.00260104995554235	0.0343831959255654
AT4TE21090	3305.4053869632	-0.893712009336089	0.296979979586196	-3.00933420017525	0.00261820938662247	0.0345618225158883
AT3TE60465	526.749813023903	-0.84015688524444	0.279235122151684	-3.00877940701191	0.00262299489705486	0.034576836765349
AT1TE39390	100.3155466947	-1.20751328050164	0.401668298092988	-3.00624491958808	0.00264495863438744	0.0348179415787835
AT5TE45065	1900.16528672288	-0.859271625971175	0.285919765930498	-3.005289344634	0.00265328314402961	0.0348324363794695
AT5TE44055	4324.8085311654	-0.785072594860528	0.261286107544424	-3.00464728966521	0.00265888986142034	0.0348324363794695
AT1TE41030	285.379239775715	-0.913310546577141	0.304000338918224	-3.00430765908725	0.00266186004787564	0.0348324363794695
AT1TE45150	704.68460595938	-0.908633371435216	0.302522253968726	-3.00352572253791	0.00266870988385522	0.0348324363794695
AT3G49870	102.943843966025	1.12842924827235	0.375703236972972	3.0035121798898	0.00266882866048946	0.0348324363794695
AT4G37430	108.568155511534	-1.15560308549967	0.384760272224752	-3.00343660435048	0.00266949158915645	0.0348324363794695
AT1TE52135	299.794696795558	-0.892562988078274	0.297206428213807	-3.0031752457123	0.00267178531840835	0.0348324363794695
AT5TE41045	769.372688280222	-0.873111684106253	0.290790667072219	-3.00254369542545	0.00267733535127698	0.0348568467848946
AT1TE48660	5393.06009893475	-0.798310120222427	0.265916148762063	-3.00211222198747	0.0026811331745318	0.0348584090921981
AT2TE17695	1899.77502708576	-0.858445256180694	0.286138417011	-3.00010486235301	0.00269886674134054	0.0350409027046927
AT5TE41265	3491.05618520475	-0.787842818045772	0.262803110145968	-2.99784434669811	0.00271896502139926	0.035226049935044
AT3TE87750	874.877596606534	-0.807427548861146	0.269352108254855	-2.99766559873063	0.00272056009205025	0.035226049935044
AT5TE42470	24603.4668651059	-0.816532655123691	0.272574291312105	-2.99563341499708	0.00273875464228619	0.0353686801350086
AT4TE16380	5083.9845748644	-0.805619279997201	0.268934039037755	-2.99560175751535	0.00273903895538049	0.0353686801350086
AT3TE50680	1052.11800020423	-0.869892105271255	0.290520035449166	-2.99425856783452	0.00275112689621035	0.0354515156969996
AT4TE62590	295.763759564188	-0.872083703642346	0.29127163709452	-2.99405638098346	0.00275295067652934	0.0354515156969996
AT2TE10985	2155.00727206526	-0.822661209958379	0.274802631276881	-2.99364386045305	0.00275667514968228	0.0354515156969996
AT1TE49295	1492.26717834268	-0.82441246929286	0.27542875379733	-2.99319681742267	0.00276071650821403	0.0354553808466838
AT2TE16605	2091.1339192104	-0.831705911082446	0.277928724625211	-2.99251512129237	0.00276688959731063	0.0354613162405418
AT2TE12430	228.930444180185	-1.0028782886665	0.335150782137004	-2.99231970240947	0.002768661533868	0.0354613162405418
AT2TE65230	128.224890362058	1.56188403436279	0.522252467289197	2.99066856011213	0.00278367449060043	0.035578975120708
AT5TE46215	5542.40208423862	-0.81332742686763	0.27197182002901	-2.99048418612221	0.00278535551166547	0.035578975120708
AT1TE57220	371.917667349438	-0.871548460951111	0.291594192341373	-2.98890884606775	0.0027997564486751	0.0357147935673521
AT2TE10955	594.00126996722	-0.924877821615453	0.309651372489452	-2.98683585407637	0.00281881027094907	0.0358086495313553
AT4TE15790	372.006015285879	-0.859224636176613	0.287690206801403	-2.98663150800176	0.00282069490680258	0.0358086495313553
AT3TE57785	2893.43566965988	-0.789206120887886	0.264262776337386	-2.98644452247902	0.00282242043843552	0.0358086495313553
AT5TE38645	789.077044505149	-0.9126851291011	0.305657165297459	-2.98597655387171	0.00282674315157093	0.0358086495313553
AT1TE51040	24541.4464438829	-0.771199429732162	0.258275667640686	-2.98595464596788	0.00282694566700909	0.0358086495313553
AT3TE59420	499.995967163167	-0.878886776986169	0.294417842358399	-2.98516818799415	0.00283422442069489	0.0358086495313553
AT1TE41170	477.922536515826	-0.858184700188069	0.28749644108113	-2.98502721272259	0.00283553096930226	0.0358086495313553
AT3TE53075	171.828239929814	-1.02411407053474	0.343106071091249	-2.98483226273888	0.00283733865773875	0.0358086495313553
AT1TE49755	756.339083872676	-0.816234769375286	0.27361543948023	-2.98314587409919	0.0028530197994524	0.035958672419162
AT4TE20950	494.618154398339	-0.901771285702915	0.302352218122676	-2.98251916689109	0.00285886746957801	0.0359845230765742
AT4TE09315	221.938946974642	-0.930103251723266	0.311918980518887	-2.98187449245958	0.00286489420364907	0.0360125560506444
AT2TE15425	645.863550059937	-0.85807934690493	0.287837633057717	-2.98112285662406	0.00287193550923346	0.0360344426729054
AT3TE50750	330.761282236101	-0.879157444658643	0.294932448231156	-2.980877315912	0.00287423914968522	0.0360344426729054
AT3TE61615	2359.41575212117	-0.800372979323833	0.268569010763482	-2.9801389856877	0.00288117626197145	0.0360736969761763
AT5TE39810	736.85279860784	-0.854715153281815	0.286905124885707	-2.97908639178998	0.00289109252261686	0.0361500988514019
AT1TE48835	5869.11967543159	-0.792744348193842	0.266250444778135	-2.97743858739629	0.00290667870566204	0.0362076833839217
AT5TE42680	5513.62723041639	-0.78596806613335	0.263976350306289	-2.97741848927527	0.00290686928144091	0.0362076833839217
AT5TE47200	6466.18748870039	-0.778674995861259	0.26152956712708	-2.9773880040221	0.0029071583725643	0.0362076833839217
AT2TE77265	412.933106520104	-1.04633434736325	0.351594573318168	-2.97596842149322	0.00292064934603298	0.0363279717870087
AT2TE17430	552.684637648326	-0.823030269347064	0.27672092874717	-2.97422487367783	0.00293729729296221	0.0364871608685397
AT3TE55155	1453.38698189613	-0.827008749984464	0.278103899844402	-2.97374021165173	0.00294194035670033	0.0364929253345858
AT5TE50790	401.803286381577	-0.871762708517059	0.293189816390305	-2.97337308386092	0.00294546189923593	0.0364929253345858
AT2TE17405	573.671053112933	-0.879842884599084	0.296018436738702	-2.97225704686674	0.00295619071988424	0.0365780360875494
AT5G61720	354.193131264115	1.03623193086787	0.348734383342874	2.97140741023246	0.00296438244288712	0.0365964443402973
AT2TE77260	413.357144186199	-1.04158984150935	0.350594763843799	-2.97092241221668	0.00296906780431743	0.0365964443402973
AT1G13270	117.173028130093	1.51257865947185	0.50913106401823	2.97090232038501	0.00296926204871161	0.0365964443402973
AT2TE19400	879.254275322314	-0.845129417223379	0.284667330900604	-2.96883177479353	0.00298934200918547	0.0367602852761007
AT1TE46700	2100.98141508281	-0.844015273483504	0.284320587675049	-2.96853379625161	0.00299224195314546	0.0367602852761007
AT4TE23575	299.072158458863	-0.943601797537241	0.317919587995066	-2.96805177525546	0.0029969384428842	0.0367602852761007
AT5TE40255	1448.62253160825	-0.822376157493649	0.277086907622421	-2.96793581678092	0.00299806926761193	0.0367602852761007
AT5TE45060	2244.9336277861	-0.82327818072134	0.277709539986896	-2.96452970524594	0.00303145974089366	0.0370911356185005
AT2TE21555	355.794617285617	-0.884089307455096	0.29823694006496	-2.96438565679533	0.00303287931043869	0.0370911356185005
AT5TE43060	2508.49651112309	-0.796645443658428	0.268889409417012	-2.96272525342542	0.00304928609462789	0.0372437288722721
AT1G50010	225.851730489547	1.11923606894112	0.377856720976134	2.96206473726271	0.00305583526465745	0.0372747748511934
AT5G15360	70.7636495614215	-1.28256510558532	0.433053787759515	-2.96167622091684	0.00305969348324841	0.0372747748511934
AT3TE59855	387.986781083539	-0.842876866341334	0.284648185483545	-2.96111800224372	0.00306524473306685	0.0372944667265823
AT1TE36890	1727.89525546645	-0.853401442735683	0.288249751068811	-2.96063201987626	0.00307008510058101	0.0373054699785984
AT2TE07145	457.641647242069	-0.985350119325197	0.332898541412363	-2.95991119439793	0.00307727733488008	0.0373225214298519
AT4TE22725	340.972227431376	-0.863775941237447	0.291845543299216	-2.95970235307604	0.00307936397532646	0.0373225214298519
AT3TE54675	425.985195521992	-0.906124896100163	0.306251079377227	-2.95876474278164	0.00308874802809129	0.0373884467563847
AT3TE53605	698.47118860988	-0.86088289831914	0.291048743395843	-2.95786502382623	0.00309777735546973	0.0374499155295179
AT5TE27075	1053.89088795565	-0.793003011709555	0.268157621884613	-2.95722719397765	0.00310419300880802	0.0374582182845856
AT2TE21350	705.994912708644	-0.931988730243642	0.315179303894823	-2.95701119561661	0.00310636838696816	0.0374582182845856
AT1G73430	75.0016291128676	1.40792293438858	0.476288592063534	2.95602909212819	0.00311627695624302	0.0374824188584268
AT2TE17640	1380.81650232715	-0.824478348477325	0.278944927193209	-2.95570296536081	0.00311957365916494	0.0374824188584268
AT4G14504	183.59662257784	-1.11077469875053	0.375815650598196	-2.95563715077454	0.00312023934155927	0.0374824188584268
AT5TE36790	697.476964290119	-0.898179390838826	0.304080034370201	-2.95375983069425	0.00313928213526002	0.0376634380734108
AT5G10340	1519.82567718412	-0.852175651270709	0.288585522944057	-2.95293971290412	0.00314763428870261	0.0377159011230384
AT5TE40100	599.797400770411	-0.820184267643119	0.27788112509232	-2.95156523268945	0.00316167755250417	0.0378007661896202
AT4G35790	106.729630232547	1.18418214062721	0.401218285948954	2.95146602759245	0.00316269335180089	0.0378007661896202
AT4TE14035	8955.41664675566	-0.776145612282066	0.263027887550839	-2.95081110793641	0.0031694067947572	0.0378332967263335
AT5TE37420	1727.09638982409	-0.79603893482164	0.26982308962918	-2.95022540849133	0.00317542167552724	0.0378574171580468
AT3TE61555	2504.27855008848	-0.844990475372063	0.286548462300412	-2.94885712730222	0.00318951389771279	0.0379665442510711
AT1TE56170	1544.40203008485	-0.803437867697295	0.272491512045588	-2.9484876856013	0.00319332861730439	0.0379665442510711
AT1TE47110	1385.73095937496	-0.809282953377149	0.274517359133855	-2.94802105021905	0.0031981528659176	0.0379665442510711
AT1TE46190	2950.11872917544	-0.791154071208605	0.268389360762839	-2.94778477418002	0.0032005981068375	0.0379665442510711
AT3TE48535	124.747917149068	-1.08032132516545	0.366585831751026	-2.9469805747953	0.00320893360905922	0.0380178409333292
AT4TE18890	1181.79991401282	-0.827303542511376	0.280785943474788	-2.94638517966146	0.00321511760124081	0.0380288258940675
AT1TE37265	219.997667096972	-0.937058912484279	0.318095753663969	-2.94583911193663	0.00322079880625806	0.0380288258940675
AT2TE15590	570.448569304781	-0.878520496094031	0.298247577648526	-2.94560815219541	0.00322320442759193	0.0380288258940675
AT5TE48825	141.900245550132	-1.06573146739238	0.361835430149554	-2.94534857173023	0.00322591010960438	0.0380288258940675
AT1TE47325	1733.3952431748	-0.81576047877626	0.27707428440612	-2.94419411936679	0.00323796838646928	0.0381119539876255
AT1TE58825	2538.20872771345	-0.784389006526553	0.266445160870428	-2.94390411882166	0.00324100389470628	0.0381119539876255
AT2G46500	106.616530650568	1.09440847467734	0.372095992012546	2.94119930923749	0.00326944093360021	0.0383987127244892
AT2TE19575	1401.52490649912	-0.817341882258904	0.277964054911621	-2.94045891120267	0.00327726464324169	0.0384429632285207
AT3TE40135	79.1045387875911	-1.3274825074576	0.4515662363445	-2.93972932565505	0.0032849907782159	0.0384859611816197
AT3TE59490	276.191230476772	-0.880336924298588	0.299706759797375	-2.9373275560877	0.00331054229928508	0.038737071951117
AT5TE79270	240.652439433135	-0.91260532307643	0.310769129687628	-2.93660224229396	0.00331829415130508	0.038737071951117
AT3TE52470	520.332524294132	-0.879086279355283	0.299358632844529	-2.93656565371821	0.00331868563244429	0.038737071951117
AT2TE24385	5422.15932511072	-0.769556668049577	0.262108013846076	-2.9360287644677	0.00332443494288726	0.0387564506625897
AT2TE54185	166.698629487507	-1.05042843548604	0.357840585618963	-2.93546477873407	0.00333048418595263	0.0387780290364781
AT5TE42975	5492.42130237499	-0.768520922280967	0.261838623346123	-2.93509380877344	0.00333446862890163	0.0387780290364781
AT2G45310	689.318000129701	-1.3191454249254	0.449703772214601	-2.93336526493688	0.00335309154233046	0.0389468157330982
AT2TE23435	92.3273836132132	-1.29413853083481	0.441495751432449	-2.93125930801356	0.00337590858214288	0.0391192940360359
AT2TE21045	1576.21133477518	-0.790387368784304	0.269643319889464	-2.93123289354363	0.00337619566590814	0.0391192940360359
AT2TE16000	755.474968347373	-0.845885292419718	0.288669171305848	-2.93029314004401	0.00338642378399435	0.0391651701009208
AT5TE40545	1434.08177804891	-0.836535473221586	0.28549803503625	-2.93009187651806	0.00338861796688117	0.0391651701009208
AT5TE37395	234.028809777304	-0.941567640811503	0.32145890283892	-2.92904515163891	0.00340005028834491	0.0391651701009208
AT5TE37415	234.028809777304	-0.941567640811503	0.32145890283892	-2.92904515163891	0.00340005028834491	0.0391651701009208
AT1G02790	2127.47836599371	-0.889775674917592	0.303811347060474	-2.9287111344807	0.00340370580506858	0.0391651701009208
AT2TE56025	486.718249555634	-0.828963013308063	0.283136346012354	-2.92778735398348	0.00341383438966765	0.0391651701009208
AT2TE21300	88.2808445397158	-1.2005394621449	0.4100830463342	-2.9275520479979	0.00341641873045087	0.0391651701009208
AT1TE52900	272.733582023502	1.23670824125458	0.42249630474157	2.927145698969	0.00342088581269311	0.0391651701009208
AT3G43160	2392.85889809044	-0.842196666453463	0.287727800610181	-2.92706045320413	0.00342182361217639	0.0391651701009208
AT5TE42350	165.144738818546	-1.00856692809626	0.34457300260713	-2.92700507719751	0.00342243293604439	0.0391651701009208
AT4TE19825	164.96683901572	-1.00974959621077	0.345011066878006	-2.92671654085754	0.00342560941270978	0.0391651701009208
AT4G02810	125.141761703005	1.49657618528692	0.511540284339307	2.9256272303556	0.00343762576336847	0.0392552011869957
AT5TE38625	443.364050285145	-0.890069403153816	0.304352527629513	-2.92446857624686	0.00345044915290666	0.0393248157516752
AT3TE50905	403.323291090128	-0.875087965891064	0.299289721750012	-2.92388245334399	0.00345695263040921	0.0393248157516752
AT3G17060	255.237387882146	0.956821992212852	0.32726805009796	2.92366453714761	0.00345937341937303	0.0393248157516752
AT1TE45815	466.986450111904	-0.884051088483781	0.302386537326105	-2.92357952275629	0.00346031824613812	0.0393248157516752
AT5TE45090	1376.50554371414	-0.793064808552672	0.271327343632168	-2.92290779814589	0.00346779187363986	0.0393625525489325
AT4TE17500	2274.14847846041	-0.783066390235364	0.268084473035167	-2.92096883258375	0.00348944734114441	0.0395609831332138
AT2TE23175	755.040718635737	-0.837627848568734	0.286871264237818	-2.91987366108003	0.00350173315373261	0.0396104078158855
AT3TE63540	11315.7369527059	-0.761403998287649	0.260769510282385	-2.91983521180498	0.0035021651983237	0.0396104078158855
AT1TE48470	371.356259051665	-0.908450623739599	0.311223481816161	-2.91896555632077	0.00351195025821205	0.0396476039583558
AT5TE32800	956.56148973698	-0.787823080548548	0.269977331605249	-2.91810825695719	0.00352162063441849	0.0396476039583558
AT1TE14865	1178.11360157909	-0.76332170299266	0.261589992675986	-2.91800804451314	0.0035227526155802	0.0396476039583558
AT3TE47450	839.126077031927	-0.838767902990407	0.287501624796215	-2.91743708782494	0.00352920835531895	0.0396476039583558
AT4TE15030	6948.5736310827	-0.762947031849956	0.261516534277364	-2.91739500891663	0.00352968456218486	0.0396476039583558
AT1TE46265	8619.98750283426	-0.762653737369661	0.261422873399151	-2.91731831822234	0.003530552620896	0.0396476039583558
AT4G04930	114.068805691116	1.06637718590049	0.365822036720111	2.9150162616266	0.00355670009641446	0.0398939686554038
AT1TE51020	3336.62226030507	-0.773073037595314	0.265419302512115	-2.91264813929661	0.00358378168220184	0.0401502160566301
AT2TE16645	615.122026470901	-0.852896233694496	0.29292933384266	-2.91161087387926	0.00359570269916758	0.0402362103691976
AT2TE12810	212.983883109397	-0.99433915652362	0.341580985731946	-2.91099094521591	0.00360284458373394	0.0402685860431961
AT5G52080	130.758177153671	-1.0734604805077	0.36908973715679	-2.90839969915417	0.00363283690665194	0.0405325849129219
AT2TE16490	496.755158491224	-0.852521452806687	0.293142810122203	-2.90821205013112	0.00363501763831859	0.0405325849129219
AT2TE16805	601.079013763743	-0.863444596958571	0.29702104424545	-2.907014885602	0.00364895833248159	0.0406402198299184
AT5TE43660	131.208318489109	-1.01570555322606	0.349550643393049	-2.90574648459154	0.00366378158616441	0.0407574200395144
AT5TE58310	82.3880205317556	1.5093531120175	0.519552224010407	2.90510374561935	0.0036713138822055	0.0407933329138848
AT2TE16910	359.505358725064	-0.872485749809345	0.300588645175844	-2.90259051302134	0.00370090196344256	0.0410739447418133
AT3TE67580	1028.46877374827	-0.774476803504907	0.266990412308901	-2.90076634890117	0.00372251329880839	0.0412654749077262
AT2TE12285	1361.24290030101	-0.791279789885382	0.272818325994136	-2.90039089933566	0.003726975555679	0.0412666756036513
AT4TE15990	1226.59321490916	-0.825030810186001	0.28457511444191	-2.89916710322333	0.00374155427458012	0.0413411494909858
AT1TE65365	421.182506216347	-0.811118651290769	0.27979252005841	-2.89900048479294	0.00374354315441615	0.0413411494909858
AT4G11385	103.285559268915	1.48256792163886	0.51145449322301	2.89872890214772	0.00374678702392454	0.0413411494909858
AT5TE37355	1668.89332837048	-0.787110636587673	0.271655492559776	-2.89745894393973	0.00376198974185362	0.0414606264805682
AT4TE14065	385.470611759686	-0.828704666679546	0.286135642443728	-2.8961951737366	0.00377717401744297	0.0415796229237218
AT2TE21805	105.225982897299	-1.06034488047832	0.366272039762311	-2.89496539557436	0.00379200332697851	0.0416944402936222
AT3G13460	290.662424283939	0.886740222462706	0.306358580626446	2.89445205239393	0.00379820912499645	0.041714282835129
AT4TE21695	193.726934057741	-0.956898015144367	0.330649609832528	-2.8939940852464	0.00380375327088946	0.0417268211822804
AT3TE51305	885.782443691546	-0.819542595049847	0.283239042616033	-2.89346619548083	0.00381015302234749	0.0417487056020919
AT5TE52885	304.247388139508	-0.847659793942023	0.293059657598299	-2.89244790937387	0.00382252562937027	0.0418359098327615
AT5TE56015	342.24795642063	0.846560283071443	0.292726092685148	2.89198778047433	0.00382812835583355	0.0418489049095622
AT2TE10945	1084.48154961876	-0.862559889319525	0.298678240182192	-2.88792343490898	0.0038779425524887	0.042332037893527
AT4TE15025	7006.11561989956	-0.755235023860772	0.26154289588464	-2.88761436744926	0.0038817545892625	0.042332037893527
AT2TE18860	326.883033363672	-0.927762374653974	0.321326022579993	-2.88729299670402	0.00388572198431826	0.042332037893527
AT3TE52335	927.04535942206	-0.828658646472589	0.287105115484856	-2.88625524861573	0.00389855838455502	0.0424231186783151
AT3TE61650	3661.67924790796	-0.838557012848749	0.290888776794901	-2.88274103280374	0.00394231397271733	0.0428500594419895
AT2TE19585	504.503602552593	-0.853175339218518	0.296072477604123	-2.88164352905269	0.00395607012832812	0.042950323798733
AT4TE08465	8800.86141844544	-0.750695735143645	0.260640427673284	-2.88019683609732	0.00397426963058021	0.0429925175315164
AT2TE16665	1132.23590045917	-0.820500822895421	0.28488251381152	-2.88013754132438	0.00397501718235434	0.0429925175315164
AT1TE48220	362.26592411953	-0.903698893884529	0.313815823972932	-2.87971104338727	0.00398039796731992	0.0429925175315164
AT3TE51170	128.017393739875	-1.02900763882728	0.357380642064018	-2.87930435427153	0.00398553499918221	0.0429925175315164
AT1TE48225	951.656864889181	-0.828206930114431	0.287725867963133	-2.87845836030479	0.00399624033356932	0.0429925175315164
AT5TE70790	228.847215640242	-0.887072536648303	0.308203384839012	-2.87820504343799	0.00399945091841951	0.0429925175315164
AT3TE36150	65.7723295505018	1.59028345238544	0.552555533202172	2.87805180986863	0.00400139416562051	0.0429925175315164
AT1TE44525	1330.45045047009	-0.818481740903252	0.284390011583628	-2.8780256252515	0.00400172631426821	0.0429925175315164
AT1TE27830	803.396145019579	-0.776723096643869	0.269913386378233	-2.87767534269471	0.0040061720132793	0.0429925175315164
AT2TE17155	1065.28238718892	-0.823179070639088	0.286080918624723	-2.87743437974248	0.0040092328578206	0.0429925175315164
AT1TE51645	4767.6252420971	-0.759402466844686	0.263920994622674	-2.87738559007175	0.00400985286957802	0.0429925175315164
AT3TE50760	10768.7178883288	-0.744423553436077	0.258789399149381	-2.87656123428137	0.00402034182739555	0.0430562710057118
AT4TE16945	8833.62478446019	-0.764758178620193	0.265921153878366	-2.87588319870934	0.00402898769454021	0.0430566664587243
AT3TE49000	81.022129569422	1.19960775526585	0.417132146618557	2.87584585602034	0.00402946435417688	0.0430566664587243
AT4TE15235	320.708051802281	-0.886219191761433	0.308198929107975	-2.87547784259482	0.00403416458948255	0.0430583468233283
AT1TE47730	2454.56473416194	-0.755241648903444	0.262765732789333	-2.87420144509079	0.00405050521860248	0.0431749923315621
AT5TE41895	1624.67948394251	-0.81082556656239	0.282132935735006	-2.87391319432468	0.00405420375343852	0.0431749923315621
AT3TE51370	457.477271895169	-0.822161246058929	0.286192367808448	-2.87275741262678	0.0040690643525699	0.0432846149648232
AT1TE48700	1183.65721468671	-0.821477861483015	0.286142421946223	-2.87087058219351	0.00409343076356615	0.043494996386861
AT3TE50555	577.575262420671	-0.828716244962806	0.288753984990737	-2.86997336154301	0.00410506380630631	0.0435227596873617
AT2TE27465	378.944621029362	-0.866095607216783	0.30177960050831	-2.86996074538489	0.00410522759659225	0.0435227596873617
AT3G06660	79.8810041193013	1.4702317860598	0.512595674859548	2.86820950345054	0.00412802086706896	0.0436691208855462
AT2TE19120	1265.09033976993	-0.797703339876405	0.278137145012549	-2.86802160078408	0.00413047332153271	0.0436691208855462
AT2TE15490	2692.57164511862	-0.783957493519624	0.2733781601952	-2.86766687199831	0.00413510674922666	0.0436691208855462
AT3G20220	72.3727711284771	1.2604291926043	0.43955887044323	2.86748664936131	0.00413746260342061	0.0436691208855462
AT3TE54695	2672.63076874341	-0.773405056073455	0.269910580583689	-2.86541214650031	0.00416466814493881	0.0439073689407453
AT1TE52855	340.006533402988	-0.895407458345988	0.312591940371136	-2.86446111592923	0.00417719436655983	0.043990498006949
AT2TE20435	3302.72670849548	-0.844670942735139	0.294965362178119	-2.86362756798905	0.00418820129658555	0.0440574604761797
AT2TE21755	1284.86253271748	-0.784910410447271	0.274153894925963	-2.86302848500198	0.00419612838012633	0.0440919121805292
AT3G28220	167.169566714305	-0.979454160918218	0.342316219343493	-2.8612554870951	0.00421966855053028	0.0442673190598717
AT5TE40920	277.07684670607	-0.89925398213008	0.314307079779251	-2.86106817180719	0.00422216252691749	0.0442673190598717
AT3G23125	9062.34976998823	0.797177166501138	0.278813796343467	2.85917403283411	0.00424745692640915	0.044483311324316
AT3TE65950	128.529382149983	-1.03191553682919	0.361089766120869	-2.85778117700454	0.00426614477659775	0.0446093329306965
AT5TE42360	1904.01727187146	-0.798239856605106	0.279341596769451	-2.85757604967053	0.00426890324626943	0.0446093329306965
AT5TE54255	2534.24054217394	-0.759280252337134	0.265742193113175	-2.85720623978508	0.00427388038742818	0.0446121567313263
AT5TE43175	490.408319196281	-0.880361681584469	0.308285943383523	-2.85566598308784	0.00429466681168628	0.0447798152268016
AT3TE57110	3450.79994474453	-0.764150228469732	0.267645686827582	-2.85508142323249	0.00430257966498254	0.0448130220491259
AT2TE87285	2328.76816250436	-0.769186456781709	0.269468975443653	-2.85445274549815	0.00431110446863972	0.0448525226715338
AT1TE90320	63.7723703278376	1.57172854436592	0.550840225998032	2.85332927804647	0.00432637671458008	0.0449057335877916
AT2TE16010	2125.80407059298	-0.776923552400164	0.272311054157668	-2.85307386732205	0.00432985556532301	0.0449057335877916
AT4TE25810	2802.23768523562	-0.737790267090744	0.258653050964029	-2.8524321067968	0.00433860793240768	0.0449057335877916
AT5TE55155	210.725341328023	-0.909762895294161	0.319036637047166	-2.85159379723421	0.00435006500640645	0.0449057335877916
AT1TE93285	506.340519824441	0.920648112826247	0.322853989936993	2.85159279897987	0.00435007866576063	0.0449057335877916
AT5TE39210	716.274106252169	-0.819290067839715	0.287325123308024	-2.85143901934883	0.00435218333384395	0.0449057335877916
AT5TE74760	93.9315993483614	1.51365220876001	0.530874181142289	2.85124472526253	0.00435484381327079	0.0449057335877916
AT3G13390	851.868038880694	1.06268993200378	0.372778485140112	2.85072764219309	0.00436193144428659	0.0449057335877916
AT5G67245	64.6692841030998	1.57828154410021	0.553680407000147	2.85052807386011	0.00436466971272983	0.0449057335877916
AT2TE13585	816.238018555487	-0.842135533669073	0.295448106121105	-2.85036700598744	0.00436688085425998	0.0449057335877916
AT4TE08475	7483.7307762758	-0.743540374033964	0.26086746337164	-2.85026106523179	0.0043683357636573	0.0449057335877916
AT1TE51690	1346.87461349217	-0.7864563183958	0.276012873555147	-2.84934651150852	0.00438091382699366	0.0449532510901027
AT3TE54180	1775.27432063968	-0.778549685724257	0.273248634081776	-2.84923541645686	0.0043824439762877	0.0449532510901027
AT1TE48370	1211.90337027701	-0.819480785365931	0.287711775410144	-2.84826988467097	0.00439576298331334	0.0449807263778488
AT1TE48475	1211.90337027701	-0.819480785365931	0.287711775410144	-2.84826988467097	0.00439576298331334	0.0449807263778488
AT1TE86795	1042.94302316483	-0.748103650521133	0.262675959329967	-2.84800958728539	0.0043993599232186	0.0449807263778488
AT5TE46210	315.740048847392	-0.940751218545878	0.330406268781311	-2.84725596162505	0.00440978900657168	0.0450387717718604
AT2TE23505	1139.60378051474	-0.777846862224512	0.273350293558152	-2.84560463462255	0.00443271935336761	0.0452142353975223
AT2TE84830	73.3404726268605	1.54005829844514	0.541310769410579	2.84505386826513	0.00444039129820923	0.0452142353975223
AT1TE51370	2605.76636483015	-0.750870527956549	0.263928725933929	-2.84497462449206	0.00444149612045068	0.0452142353975223
AT5TE44675	188.318830132206	-0.976474662375233	0.343477620175297	-2.84290621868429	0.00447042223481944	0.0452142353975223
AT3G20210	74.3392720848725	1.24082434215806	0.436468987248907	2.84286943266934	0.00447093821898415	0.0452142353975223
AT2TE26785	343.636624619856	-0.847582896398526	0.298150055060088	-2.84280643928678	0.00447182192977073	0.0452142353975223
AT4TE21095	1163.00500677551	-0.810505888579549	0.285121450312295	-2.84266893175451	0.00447375152175664	0.0452142353975223
AT5TE93635	2352.24712809509	-0.765514110324574	0.269299686616425	-2.8426104758708	0.00447457203990556	0.0452142353975223
AT5TE46025	138.805884643304	-0.976144023036272	0.343414698351758	-2.84246430837509	0.00447662432209252	0.0452142353975223
AT4TE50995	542.304415141724	-0.785889550504848	0.276495085317116	-2.84232737664578	0.0044785477021129	0.0452142353975223
AT1TE01910	980.675406807802	-0.755211547877742	0.265707777995991	-2.84226360844106	0.00447944366303792	0.0452142353975223
AT2TE40200	1212.08360411821	-0.73726642866486	0.259502383808691	-2.84107767275226	0.00449613601085638	0.0453344437349966
AT2TE06025	1053.77360972133	-0.756370368236145	0.26627461994355	-2.84056500914918	0.00450336931303509	0.0453591225812397
AT4TE16390	1034.40508808343	-0.815355497104465	0.287074897044606	-2.84021872165916	0.00450826113602805	0.045360190071416
AT4TE22095	223.508732324703	-0.916605028106652	0.322876697764966	-2.83887017691776	0.004527357236749	0.0455040210921602
AT2TE42170	1246.81296438421	-0.736857647844391	0.259626994466684	-2.83813957542441	0.00453773351223167	0.0455484092501691
AT5TE38635	1045.72326237611	-0.811938186706865	0.286107015106082	-2.83788283347689	0.00454138496955157	0.0455484092501691
AT5TE39105	959.519251780451	-0.760449224103205	0.268180837053031	-2.8355837518429	0.00457420199158373	0.0457983962878155
AT4TE13850	1383.79731357613	-0.759704044717425	0.267930955782832	-2.83544707440671	0.00457615966844062	0.0457983962878155
AT4TE20745	9944.9562646393	-0.738584309410718	0.260512272991308	-2.8351228943266	0.00458080604355868	0.0457983962878155
AT4TE09560	1109.03875747273	-0.790267569015435	0.278837706010885	-2.83414886860598	0.0045947921766561	0.0458898211278677
AT3TE55410	2506.69210282343	-0.74743725473717	0.263789635771105	-2.83345951994011	0.00460471396190872	0.0459128031414486
AT4G14342	59.9268503236895	1.60997377044826	0.568278625514114	2.83307113476552	0.00461031252542092	0.0459128031414486
AT3TE62000	178.066029252534	-0.954374581517143	0.336880086969009	-2.83298009717309	0.00461162572174078	0.0459128031414486
AT5G28237	1401.77501506157	-0.79130269656677	0.279395668489901	-2.8321938591377	0.00462298112767663	0.0459775604702194
AT3TE54700	2584.72919761882	-0.765243314387368	0.270281368664021	-2.83128399922608	0.00463615356878545	0.046060234302881
AT3TE50550	707.949557647801	-0.791032056917643	0.279454032059389	-2.83063390099712	0.00464558613276014	0.0460749637419281
AT1G20400	717.559911131245	-0.988847137454677	0.349352761093883	-2.83051187103382	0.00464735865554793	0.0460749637419281
AT3TE59100	9433.0094999885	-0.736667719412591	0.260516024268834	-2.82772517153265	0.00468800335000999	0.0464293581519276
AT4G13430	117.590135010749	1.3964561026617	0.494056724184802	2.82650965831072	0.00470583249202505	0.0464786059955131
AT1G27930	74.1993413610158	-1.51899265639635	0.537440722361281	-2.82634454963249	0.00470825903471104	0.0464786059955131
AT1TE47080	932.058856302959	-0.810550391472476	0.286808386598356	-2.82610421921715	0.00471179310843739	0.0464786059955131
AT3TE61535	2947.92672429616	-0.789352754187966	0.2793130924475	-2.82604996160835	0.00471259130214054	0.0464786059955131
AT1G46696	200.612800636718	-0.900475637320685	0.318889508813897	-2.82378570768911	0.00474601049396091	0.0467595503760514
AT3TE08860	76.4950455694705	1.52224711626685	0.539146315656036	2.82343970841119	0.004751136111472	0.0467614413961907
AT3TE54670	445.52430603985	-0.863199035520638	0.305807665240321	-2.82268606590449	0.00476231788295674	0.0468228722973693
AT4TE19875	325.948304986642	-0.871366849813997	0.308768340974369	-2.82207316677693	0.00477142900412755	0.0468638384467574
AT3TE64705	98.9424809051849	-1.09701718155202	0.388851563083699	-2.82117210190021	0.00478485253225651	0.0469470313672124
AT4TE50640	554.220596647215	-0.84234344743462	0.298649011765306	-2.82051309145659	0.00479469170540285	0.0469886460782017
AT5G22000	90.2739569572407	1.12008142310372	0.397160404532931	2.82022429809175	0.00479900922174502	0.0469886460782017
AT1TE47545	3221.03107955673	-0.740756449556598	0.262783396080069	-2.81888605066544	0.00481906223884777	0.0471052504557649
AT4TE18360	787.644428465567	-0.823327959680208	0.292088037199563	-2.81876644991691	0.00482085808631483	0.0471052504557649
AT5TE40170	1017.87257545986	-0.818837119503404	0.290609482790931	-2.81765450886022	0.00483758328221172	0.0472199941800234
AT4TE17885	1392.69741002688	-0.787606354975456	0.279586688828187	-2.81703810105016	0.00484687754615869	0.0472555857356636
AT5G36550	302.646934286089	-0.819914916034132	0.291114889551815	-2.81646506400422	0.00485553234867107	0.0472555857356636
AT1TE27810	892.175392669103	-0.7575532804804	0.269014952466333	-2.8160266689087	0.00486216303860378	0.0472555857356636
AT1TE52000	2959.55441564573	-0.765025262423273	0.271675003475417	-2.81595749567183	0.00486321002609264	0.0472555857356636
AT2TE10980	3659.40434152018	-0.752437159308183	0.267223208955886	-2.8157627559678	0.00486615864929391	0.0472555857356636
AT4TE23735	370.047213477281	-0.851963289548807	0.302625542179841	-2.8152392009347	0.00487409400354198	0.0472822262868915
AT3G12630	386.808358771067	-1.0121937668551	0.359681758250581	-2.81413706321446	0.00489083702115107	0.0472822262868915
AT1TE37215	483.307496585617	-0.860510958155833	0.305799634302741	-2.81396987317496	0.00489338141213167	0.0472822262868915
AT3TE58710	321.459625081045	-0.852846889530717	0.303105761977897	-2.81369408474956	0.00489758113048143	0.0472822262868915
AT2TE21750	1550.05912768895	-0.76722383186174	0.272719252918293	-2.81323677610542	0.00490455223288646	0.0472822262868915
AT4TE08945	1681.07960565069	-0.767511023713667	0.272857725815858	-2.81286161650278	0.00491027777558791	0.0472822262868915
AT3TE49715	1037.18258536997	-0.791961632774073	0.281591652742865	-2.81244712000484	0.00491661069241925	0.0472822262868915
AT3TE67780	2326.29563906508	-0.759719693997068	0.270137390621713	-2.81234557070606	0.00491816334751649	0.0472822262868915
AT1TE47250	112.774245866774	-1.05262834413233	0.374293845671028	-2.81230470740226	0.00491878825900771	0.0472822262868915
AT1TE47470	112.774245866774	-1.05262834413233	0.374293845671028	-2.81230470740226	0.00491878825900771	0.0472822262868915
AT1TE72615	114.388845247568	-0.991934018691344	0.352754028365465	-2.81197077546529	0.0049238976822619	0.0472833862537774
AT4TE15015	1229.73619313036	-0.739450856524574	0.263131269590658	-2.8101975780944	0.00495110951884975	0.0474694404168069
AT5TE37215	1251.88674490419	-0.809023332306652	0.287902930307006	-2.81005591517929	0.00495328936191412	0.0474694404168069
AT3TE55375	2656.48861261787	-0.744300755305642	0.264936733719444	-2.80935280229514	0.0049641213861265	0.0475075652710737
AT5TE37375	192.243378118014	-0.949464222684588	0.338044496310502	-2.80869599430627	0.00497425939339969	0.0475075652710737
AT1TE20110	2341.14650146706	-0.754068193392603	0.268506225769796	-2.80838252904833	0.00497910441070602	0.0475075652710737
AT4TE15945	7263.52209637468	-0.735553849910792	0.26192228382834	-2.80829045608377	0.00498052832991738	0.0475075652710737
AT5TE39060	488.289692269008	-0.795201394786694	0.28317383104271	-2.8081740175587	0.00498232959268277	0.0475075652710737
AT5TE39045	978.218512618996	-0.853791976597885	0.304085379971193	-2.80773767117238	0.00498908495820958	0.0475241680742818
AT2TE17205	639.93137623573	-0.810139715626374	0.288594602702876	-2.80718942086543	0.00499758452247769	0.0475573354458268
AT5G47620	130.241399844632	1.06230228989701	0.378543638475888	2.80628752387467	0.0050115951866595	0.0475692713514348
AT1TE49960	241.628001183633	-0.851196110300975	0.303322973178551	-2.80623686818445	0.00501238315801553	0.0475692713514348
AT5TE42900	9432.66963139338	-0.732222725647196	0.260951058910248	-2.80597721544038	0.0050164239287119	0.0475692713514348
AT5TE44755	178.497975218362	-1.01253298663252	0.360869183035045	-2.80581727183445	0.00501891447050378	0.0475692713514348
AT1TE37210	200.103631961849	-0.962142374300209	0.34299054158275	-2.80515716223645	0.00502920511713324	0.0476191869132756
AT1TE47640	654.823166282904	-0.815075232367909	0.290651211979541	-2.80430701395212	0.00504248643794163	0.0476499484239875
AT2TE30025	361.946444513478	-0.845696499878401	0.301570736210158	-2.80430558517141	0.00504250878553065	0.0476499484239875
AT1TE79030	211.323522178137	-0.915059091719414	0.3265587046659	-2.80212739285454	0.00507668224351124	0.0478451409844597
AT5TE45105	223.7148188073	-0.868681726082418	0.310044698412418	-2.8017951299619	0.00508191344888508	0.0478451409844597
AT5TE46910	178.586037246504	-0.915319224647942	0.326709949695977	-2.80162641358092	0.00508457161410341	0.0478451409844597
AT4TE15005	9646.34967899556	-0.724874569044493	0.258754942355584	-2.80139410071001	0.00508823381332418	0.0478451409844597
AT5TE40440	951.046245554763	-0.804357967078513	0.287128855918397	-2.80138324831801	0.00508840494960281	0.0478451409844597
AT3TE57720	135.876979151628	-0.959507111463437	0.342586064047	-2.80077683291811	0.00509797606054748	0.0478876284458563
AT4TE09550	367.542244021228	-0.913897636934515	0.326455924908813	-2.79945183163635	0.00511894532392022	0.0480369938416989
AT5TE41300	1146.91686759828	-0.790479990824126	0.282428048367555	-2.79887212121151	0.00512814422077054	0.0480757180261752
AT1TE05585	179.242013024875	-0.889214524042509	0.317775162499532	-2.79825055252334	0.00513802392331095	0.0481207418430249
AT1TE39395	117.491079017549	-1.08197728317644	0.386716631248027	-2.79785557627723	0.00514431092226356	0.0481320621137355
AT4TE21910	1971.77405538844	-0.755551012219544	0.270084358260127	-2.79746304853333	0.00515056583439976	0.0481430601365295
AT5TE87980	3045.35707001955	-0.720881879797646	0.257785797218574	-2.79643753680664	0.00516693976527038	0.0482485271874213
AT2TE20440	1669.02675151914	-0.74410006332376	0.266228909347257	-2.79496342132097	0.00519055878004317	0.0484213741311508
AT2TE15880	4037.40505533479	-0.732656982289962	0.262243589227978	-2.79380321344304	0.00520921676943828	0.0485139443435933
AT5TE87975	3046.59006368423	-0.720244446405957	0.257813601708878	-2.79366349033537	0.00521146782285982	0.0485139443435933
AT4G39080	63.2304069648559	1.20673434845011	0.43199600031048	2.79339241007514	0.00521583765415927	0.0485139443435933
AT5G52797	72.28220684993	1.18297013392955	0.423707115816722	2.79195248267024	0.00523910492100437	0.048665131736962
AT5TE31125	240.082413329926	-0.875724210215494	0.313682730735539	-2.7917514240011	0.00524236120525831	0.048665131736962
AT5G13890	697.776103388701	0.750505530826305	0.26905596370414	2.78940306876668	0.00528053006468056	0.0489463124344241
AT5TE33035	497.073266693441	-0.78812686146573	0.282602674663373	-2.78881600255383	0.00529011104920982	0.0489463124344241
AT2TE17595	721.42143878345	-0.818626491480764	0.293556272947104	-2.78865269429372	0.00529277904780887	0.0489463124344241
AT4TE18825	1118.99756393874	-0.759396173152513	0.272369242955015	-2.78811280199481	0.00530160802547026	0.0489463124344241
AT5TE41110	905.352159934591	-0.758279282817062	0.271985735620681	-2.78793768756528	0.00530447456601183	0.0489463124344241
AT2TE13895	591.667032700472	-0.766964565359419	0.275106730108311	-2.7878800531614	0.00530541832013686	0.0489463124344241
AT3TE84475	1191.10034955301	-0.737186123628299	0.264470424151365	-2.78740477690006	0.00531320667640191	0.0489463124344241
AT2TE39495	1275.6304079849	-0.730213717100421	0.261987376021783	-2.78720955256908	0.00531640881005893	0.0489463124344241
AT2TE22510	296.449207035991	-0.852733823621826	0.30596355168734	-2.78704381263433	0.00531912869882431	0.0489463124344241
AT5TE55655	1085.88278992342	-0.764492187588892	0.27444467228582	-2.78559675151104	0.0053429292525802	0.0491176367177063
AT4TE14285	484.207720248006	-0.823896662173904	0.295834521663513	-2.78499161470755	0.00535291073343103	0.0491617131118792
AT1G42430	64.6977558563173	1.44663627304302	0.519663949511928	2.78379186087801	0.00537274997850256	0.0492961513032403
AT1TE87630	1246.00607792597	-0.798968631503256	0.287136650835937	-2.78253796294283	0.00539355549051753	0.0494104916181734
AT2TE25095	758.104559586632	-0.828404793599006	0.297728945241517	-2.78241268388267	0.00539563819632934	0.0494104916181734
AT4TE04220	1225.97649116247	-0.723888055540359	0.260228114708293	-2.78174422602959	0.00540676327451138	0.0494645775249217
AT2TE16580	1261.63964765976	-0.789723023834334	0.283985502964671	-2.7808568239928	0.00542156421458626	0.0495521558590632
AT1TE58000	2356.34533690656	-0.745104304741655	0.267994733451091	-2.78029457947403	0.00543096078677066	0.0495902180510716
AT5TE42365	1836.53832291384	-0.772108936942288	0.277796847274949	-2.77940136656084	0.00544591893930957	0.0496789410074842
AT1G80280	58.8487041455451	1.45723980951544	0.524548310896283	2.77808502905193	0.00546803072593218	0.0497885996450204
AT2TE17790	305.872560672326	-0.854218335767038	0.307502955067984	-2.7779191116332	0.00547082354384487	0.0497885996450204
AT3G06150	110.290866401089	1.23710577372731	0.445367432850997	2.77771943450835	0.00547418633183174	0.0497885996450204
AT4TE13505	2665.39588078051	-0.736304605326877	0.265102215850963	-2.77743663123818	0.00547895225044906	0.0497885996450204
AT1TE52865	1150.36961228425	-0.795578087509905	0.286557056248006	-2.77633396269034	0.00549757067177736	0.0499099375738562
AT5TE43750	548.008336359977	-0.817272720332728	0.294423418754461	-2.77584141842434	0.00550590565596496	0.0499377739782162

## Sheet: DESeq sRNA SC-RTL1
siRNA-producing genes and TEs deregulated in SC-RTL1 pollen (vs WT Col-0)
	baseMean	log2FoldChange	lfcSE	stat	pvalue	padj
AT4TE21060	5702.97328108738	-3.11676533131058	0.270810866302918	-11.5090113401295	1.18832880224396e-30	1.38559138341646e-26
AT1G34400	6965.43366874252	-2.82992829074116	0.264305071613654	-10.7070525490248	9.43169662213719e-27	5.49867913070598e-23
AT1TE51480	5582.52386552689	-2.75164796698843	0.26138621559999	-10.5271349549641	6.47760683534279e-26	2.5176298566699e-22
AT1TE28395	5728.5529780579	-2.76415146610848	0.281257283790239	-9.82783958110746	8.54317774294542e-23	1.44356527184335e-19
AT1TE28450	5728.5529780579	-2.76415146610848	0.281257283790239	-9.82783958110746	8.54317774294542e-23	1.44356527184335e-19
AT1TE28500	5728.5529780579	-2.76415146610848	0.281257283790239	-9.82783958110746	8.54317774294542e-23	1.44356527184335e-19
AT1TE28325	4995.02928277574	-2.69624427718269	0.275318571157076	-9.79317982746763	1.20447146499576e-22	1.44356527184335e-19
AT1TE28505	4995.02928277574	-2.69624427718269	0.275318571157076	-9.79317982746763	1.20447146499576e-22	1.44356527184335e-19
AT1TE28400	4777.24917299309	-2.70345591310791	0.276732218317014	-9.76921274128962	1.52633466175121e-22	1.44356527184335e-19
AT1TE28455	4777.24917299309	-2.70345591310791	0.276732218317014	-9.76921274128962	1.52633466175121e-22	1.44356527184335e-19
AT3TE66890	10196.7921022485	-2.63992881471171	0.270320601355677	-9.76591795620562	1.57677533779256e-22	1.44356527184335e-19
AT1G25025	11227.2783879911	-2.68777427132194	0.275490515180369	-9.75632235310243	1.7332687655066e-22	1.44356527184335e-19
AT1G25112	11227.2783879911	-2.68777427132194	0.275490515180369	-9.75632235310243	1.7332687655066e-22	1.44356527184335e-19
AT1G25180	11227.2783879911	-2.68777427132194	0.275490515180369	-9.75632235310243	1.7332687655066e-22	1.44356527184335e-19
AT1G24851	10499.945526165	-2.67603323286555	0.275067243650091	-9.72865106493631	2.27590914074828e-22	1.76914003874167e-19
AT1TE28320	4212.59242152586	-2.68791134443271	0.279606995764094	-9.61317629799405	7.03448142988331e-22	5.12637834202747e-19
AT3TE53100	8911.66455878383	-2.46746017415741	0.262600902463043	-9.39623646002004	5.65496698012854e-21	3.87864205813522e-18
AT1TE67635	2017.19122310389	-2.52034996704465	0.271850642541196	-9.27108335476058	1.84264703939453e-20	1.19362580440779e-17
AT5TE40320	9270.81873926972	-2.40676365722132	0.263015311490979	-9.1506598744304	5.65868264826126e-20	3.47264419361717e-17
AT5TE43375	5160.25118864877	-2.4162178394937	0.266941128335922	-9.05150081051992	1.41016618781375e-19	8.22126887495418e-17
AT2TE20945	8568.11460157834	-2.32590944314335	0.26159427229952	-8.89128581714599	6.04057771348816e-19	3.35395886377485e-16
AT1G19880	113.916680217202	5.04688374787697	0.570415025805857	8.84773983775578	8.93095524068996e-19	4.73340627756568e-16
AT5TE42270	12466.9197112041	-2.30823907375041	0.262211341322066	-8.80297191613565	1.33239910955504e-18	6.75468418148339e-16
AT3TE47560	9203.54970227544	-2.33530516044215	0.265782041180012	-8.7865423490388	1.54233557230932e-18	7.4931803221361e-16
AT3TE50130	7732.3630475796	-2.32188184980061	0.264527232546063	-8.77747756800915	1.6718183871544e-18	7.79736095768811e-16
AT4TE12620	11933.4627599528	-2.27437087653396	0.26058301272187	-8.72800898561061	2.59195064901231e-18	1.16239017567245e-15
AT1TE40940	13848.3270323899	-2.272585263628	0.262194862425114	-8.66754307314877	4.41544627477009e-18	1.90681865051182e-15
AT4TE08985	16675.6892963896	-2.22864296513182	0.260473387446011	-8.55612539531994	1.16724331287543e-17	4.86073465290269e-15
AT2TE00045	14958.0932922189	-2.23190139040654	0.261181252058046	-8.54541194216539	1.28078589420728e-17	5.14964259532994e-15
AT4TE10985	13306.5079332751	-2.20015594756128	0.25956288155764	-8.47638897502647	2.32291205429049e-17	9.02838485100905e-15
AT1TE67645	14273.0722994133	-2.23588817707323	0.263939307114299	-8.47122090877119	2.42834208471695e-17	9.13369958316117e-15
AT2TE12230	7149.46073137152	-2.23419166294206	0.266092147085634	-8.39630814893254	4.60735548984016e-17	1.67880515661051e-14
AT3TE47555	9679.13796401931	-2.21579269500665	0.264411356456531	-8.38009654615921	5.28843057499307e-17	1.86857880316422e-14
AT4TE10980	13467.4290865358	-2.17059097540391	0.259334764033223	-8.36984190490495	5.76955879035011e-17	1.97861927927889e-14
AT2TE20965	12872.7990050911	-2.19547746182715	0.263838220087504	-8.32130182313618	8.70023887972663e-17	2.8984224382175e-14
AT2TE00035	14347.6523768989	-2.17731594713927	0.261761649129089	-8.31793333509111	8.95103319451928e-17	2.89914019578041e-14
AT2TE26610	11743.8819517927	-2.1797950947408	0.26242230177607	-8.30643996332623	9.86160889586066e-17	3.10439735593125e-14
AT3TE50125	8061.09547054499	-2.18393681771572	0.263092837621682	-8.30101205893012	1.03228214176629e-16	3.10439735593125e-14
AT2TE38905	11184.5268839904	-2.1425266508505	0.258125915929658	-8.30031592579166	1.03834902985694e-16	3.10439735593125e-14
AT2TE20445	2654.18824080859	-2.17875736361458	0.263490352581487	-8.26883163754838	1.35278144650856e-16	3.94335791657247e-14
AT5TE41105	7467.23357131555	-2.28019362628504	0.277657578585718	-8.21225063583526	2.17080553441631e-16	6.1735591539742e-14
AT2TE17875	52395.6579105137	-2.27240851635772	0.278018547648002	-8.17358602719848	2.99355731916416e-16	8.31068531939383e-14
AT1G25054	13109.3517601651	-2.20094681333806	0.269685315507593	-8.16116668864787	3.31803894104395e-16	8.99728698897033e-14
AT4TE23410	29888.76692182	-2.12901043130399	0.261801567388436	-8.13215311329733	4.21731656746824e-16	1.11758889037908e-13
AT4TE14445	10207.831686272	-2.12341825586309	0.262357162182524	-8.09361649668177	5.79188487740428e-16	1.50074172601186e-13
AT1TE51245	20139.0288152765	-2.08126688823962	0.257874086183887	-8.07086481250968	6.98019702560994e-16	1.76932820257852e-13
AT1G24880	12390.7106295108	-2.16882552005692	0.269069915872335	-8.06045340678648	7.60119815288765e-16	1.88574405239723e-13
AT4TE00225	2540.43995129619	-2.35165600879584	0.292303299892181	-8.04525987104243	8.60625985344013e-16	2.09060395606483e-13
AT1TE45860	12178.597724266	-2.09617740522867	0.261209241965437	-8.0248975474843	1.01610709784902e-15	2.41792015528971e-13
AT2TE00120	11379.2078870847	-2.09116494661558	0.260896314577137	-8.0153104117433	1.09859204235354e-15	2.56191664276845e-13
AT2TE00030	31027.8567374978	-2.07881864812426	0.25959595182172	-8.00790086877748	1.16682896939988e-15	2.66769133003971e-13
AT1TE01145	470.027631943503	-2.60421203668304	0.326289719788808	-7.98128742262742	1.44814811204536e-15	3.24719365124018e-13
AT4TE15590	21820.5621938954	-2.26681676682454	0.284331095036332	-7.97245467132212	1.55553298560003e-15	3.42217256832008e-13
AT4G16900	7838.64491850316	-2.41340726657909	0.303189605275203	-7.96005939711706	1.71956712783241e-15	3.71299124268999e-13
AT4G08760	13116.0521402645	-2.09693226119964	0.263554807651173	-7.95634228754054	1.77199754874422e-15	3.75663480333775e-13
AT3TE51565	12592.8665345591	-2.09989101897828	0.264632165490243	-7.93513144967899	2.10272498788292e-15	4.31402393976709e-13
AT5TE45130	19395.0571399752	-2.24092531380103	0.282418551392796	-7.93476668848247	2.10891393281925e-15	4.31402393976709e-13
AT4TE13560	5782.52768246539	-2.10314971833122	0.265730252187036	-7.91460400545927	2.48041295557447e-15	4.98648535551695e-13
AT4TE08980	62535.5732386002	-2.14894150367864	0.272640326072892	-7.88196498526822	3.22272343158407e-15	6.36897545970682e-13
AT1TE45855	12486.7333846683	-2.0488451591138	0.260825801456822	-7.85522424418956	3.9905753670026e-15	7.75501812987506e-13
AT4TE20885	2649.5044148598	-2.15435738772978	0.275516261660893	-7.81934748512731	5.30978506373095e-15	1.01495235808365e-12
AT3TE47595	45234.3264507689	-2.20305913374611	0.281931818745886	-7.81415571873352	5.53326546569097e-15	1.04061089241866e-12
AT2TE11540	52759.7813743091	-2.17055043083599	0.277985860109871	-7.80813250709261	5.80415475074103e-15	1.07422927608953e-12
AT3TE70530	9158.07309692931	-2.06088693202866	0.265070153260056	-7.77487358226546	7.55227891376407e-15	1.37593081460139e-12
AT4G00140	6349.12861697782	-2.08190676661734	0.268541351911546	-7.75264871424007	8.99953246256311e-15	1.61437766943824e-12
AT1TE40955	6754.61353217022	-2.20643086468846	0.284758892678756	-7.74841777172382	9.30445906837661e-15	1.64378776874653e-12
AT3TE61295	21037.6088222213	-2.15706867368126	0.278492896018585	-7.74550699324592	9.52012128288865e-15	1.65678528594749e-12
AT3TE61305	16026.5811291144	-2.13484796817935	0.275696144775996	-7.74348139657131	9.67309471634674e-15	1.65865124106769e-12
AT3TE57550	12304.7712782066	-2.02312912656195	0.262177783430514	-7.7166306774355	1.19445108375101e-14	2.01136142179154e-12
AT2TE00075	57052.7942359073	-2.1689671420763	0.281127472951986	-7.71524433133842	1.2075068569932e-14	2.01136142179154e-12
AT4TE21160	8255.85677000626	-1.99563879687327	0.259025515097387	-7.70441010849052	1.31449069596078e-14	2.13935383191854e-12
AT2TE12225	7731.22306871696	-2.03283283172602	0.263874890455437	-7.70377518003865	1.32104181730819e-14	2.13935383191854e-12
AT5TE36830	38142.5801559075	-1.99161637555849	0.259538958667355	-7.67367021037909	1.67143484220911e-14	2.66971647399428e-12
AT4TE08440	29877.8693769404	-2.15996016183506	0.2818952953214	-7.66227814966688	1.82663492457109e-14	2.87818421898634e-12
AT4TE15585	22646.5949903226	-2.1475901249187	0.280509585702574	-7.65603114610069	1.9176723480142e-14	2.98134127704608e-12
AT1TE51240	445.13458135799	-2.33298944356496	0.304892533728311	-7.65184183107574	1.98120839497393e-14	3.03959077439422e-12
AT4TE42950	14684.7390623129	-2.22618549096512	0.292085057506139	-7.62170276690147	2.50350987268374e-14	3.78231048940868e-12
AT4TE08435	30126.3649842248	-2.14255528772808	0.281162889853857	-7.62033456421556	2.5301905503763e-14	3.78231048940868e-12
AT2TE00015	150383.980215913	-2.14300755629324	0.281327625065742	-7.61747999611646	2.58675981439873e-14	3.81792651087205e-12
AT5TE40350	38941.4549743285	-2.07940390515478	0.273233713340904	-7.61034895631779	2.73356858967236e-14	3.98417621944747e-12
AT4TE00230	7292.29924440112	-2.01930529876215	0.265694969364371	-7.60008856619674	2.95928150816258e-14	4.25990399816984e-12
AT2TE13955	31165.6128317648	-2.10107592884359	0.277473145835624	-7.57217756160187	3.67019330708048e-14	5.21883584884858e-12
AT2TE13950	31355.6163145365	-2.08835061303508	0.27734813383114	-7.5297085442318	5.08537051874364e-14	7.14402653596999e-12
AT2TE00110	33411.2805259348	-2.07650332191473	0.27769896508103	-7.47753352738938	7.57304512230207e-14	1.05121078721479e-11
AT1TE51235	21368.8989132426	-1.91562875241039	0.256372825146725	-7.47204291763004	7.89592446627336e-14	1.08313505031467e-11
AT5TE36825	38918.3772847823	-1.92846937261531	0.259312083437731	-7.43686660123723	1.03101570845274e-13	1.39786548378593e-11
AT3TE61290	38731.8659575309	-2.01423966302314	0.273246706740445	-7.37150572481173	1.68711518188689e-13	2.26112218629898e-11
AT5TE43200	7493.66827449526	-1.93182605148728	0.262240972431702	-7.36660649773332	1.75026131616796e-13	2.31909624392255e-11
AT3TE70525	6144.01576088209	-1.94651302082752	0.265261741807824	-7.33808429199612	2.16672701915774e-13	2.8386558475707e-11
AT2TE21610	11840.2624149278	-2.02257402402107	0.275973957265679	-7.32885828815341	2.32121672409709e-13	3.00726522255245e-11
AT2TE20960	14331.4881620359	-1.88820034013668	0.2618100573563	-7.21210009731219	5.50954478465229e-13	7.05948265813689e-11
AT5TE17365	1155.78177643645	-2.04254787106182	0.28874993776855	-7.07376038535821	1.50790572626471e-12	1.91110660524418e-10
AT4TE21055	11894.6883565965	-1.81542873297558	0.256740315631217	-7.0710699584216	1.53743600867165e-12	1.92758106033457e-10
AT2TE20940	10126.9030207366	-1.8235471740492	0.258463514745482	-7.05533690449466	1.72183031228586e-12	2.13580228098437e-10
AT5TE20430	495.524428242642	-2.16146102903067	0.307556865910938	-7.02784190048478	2.09752365819802e-12	2.57443430048305e-10
AT5TE37370	20556.2320832851	-2.05293843345051	0.292665704481593	-7.01461907566838	2.30576283258715e-12	2.80054110707981e-10
AT5TE37380	20574.5773409856	-2.04934342886832	0.292595204056683	-7.00402262393649	2.48715924267102e-12	2.98971925459218e-10
AT2TE12435	4039.74118725311	-2.06306587242425	0.295872353718443	-6.97282407935786	3.10640983267087e-12	3.69599373968799e-10
AT4TE71195	653.226234976799	-2.03802564619257	0.293371905911338	-6.94690120330915	3.73396996747784e-12	4.39778685058502e-10
AT2TE22870	1057.24490142617	-2.01748740337105	0.294263834148853	-6.85604946733109	7.07908728447741e-12	8.25421577370067e-10
AT5TE37400	19654.1457316783	-1.99501024421257	0.291138077090523	-6.85245387394747	7.25937979409706e-12	8.38063053457146e-10
AT5TE42265	15544.999347406	-1.69752756278751	0.256307875237762	-6.6230019706293	3.51976326977714e-11	4.02357252211779e-09
AT2TE27820	2200.27617278887	-2.11611391926761	0.323809899050089	-6.53505011883617	6.35882437053837e-11	7.19843613208519e-09
AT1G32713	28898.8043812176	1.94548804803239	0.299140087168535	6.50360192927371	7.84192427266088e-11	8.79200355954095e-09
AT4TE50935	904.674695359263	-1.92493874753682	0.296762750351285	-6.48645675799346	8.78784857558343e-11	9.75869660869551e-09
AT1TE67110	459.233881681752	-1.93946044530426	0.299453343427235	-6.47666986485169	9.37690437349998e-11	1.031459481085e-08
AT1TE62440	2485.98914659903	-2.23987443131475	0.347464145357416	-6.44634694325288	1.1457821161592e-10	1.24858125929124e-08
AT3TE58050	1101.41719003925	-1.7666149005506	0.274176313934893	-6.44335345820611	1.16862103239848e-10	1.26167789238577e-08
AT1G02010	548.86240543336	-2.03442095166349	0.317815022002729	-6.40127373100072	1.54086036422108e-10	1.64829649970805e-08
AT1TE41800	1229.63788218367	-2.17160880356413	0.34402974514193	-6.31227047727583	2.7497109752411e-10	2.91469363375556e-08
AT1TE69795	936.640613050763	-1.91086530570467	0.303648971042186	-6.29300767641723	3.11372934541616e-10	3.27081839347319e-08
AT5TE17320	550.196741242369	-1.98339635141078	0.31539983688901	-6.28851419510641	3.20518765201598e-10	3.33682928772377e-08
AT5TE37360	66109.7318071426	-1.7699590269708	0.282148379278986	-6.27314972176635	3.53816371526887e-10	3.65088397522434e-08
AT5TE41650	678.904540278222	-1.83706491725652	0.293840850213341	-6.25190444392853	4.05477470657357e-10	4.14725202444279e-08
AT2TE17835	448.513897100513	-1.87945396898493	0.301201804262032	-6.23984963698919	4.37991709777835e-10	4.44085507479092e-08
AT5G26038	172.016246329246	2.19127814221399	0.355957330732729	6.15601352472023	7.45988556428915e-10	7.49847117927685e-08
AT1G61226	361.610701708033	1.84305717400427	0.299970662465505	6.14412475825436	8.04056285606859e-10	8.01307375228716e-08
AT1TE02075	515.412683575619	-1.8235240931175	0.299113377930171	-6.09643107819539	1.08462681072965e-09	1.07175835704303e-07
AT5G26030	211.267450211249	2.02696589588181	0.340659927010346	5.9501154528817	2.67953411044479e-09	2.6254930863686e-07
AT5G35407	940.932965957615	1.61412099375191	0.271535141586785	5.94442761374965	2.77424527418158e-09	2.69564165807977e-07
AT1G54420	327.249200945006	-1.86090454440839	0.316234666031454	-5.88456846860455	3.99093899987556e-09	3.84581394533463e-07
AT1G71002	1150.76884662714	2.09061728578881	0.355836781072545	5.87521413465852	4.22297111464082e-09	4.03605272104196e-07
AT5G14800	695.951422159404	-1.7473782254143	0.302057461293162	-5.78491992196935	7.25468806294342e-09	6.87720835885531e-07
AT5TE23435	117.607693191295	2.07587443646889	0.360699249673965	5.75513932547757	8.65703657926318e-09	8.14040697695231e-07
AT1G80120	888.723275949997	-2.05357917735344	0.356943623917957	-5.75323115401959	8.75536379972007e-09	8.16700335237888e-07
AT1G60072	4578.23770636965	1.55819269057002	0.271286900094429	5.7437078238118	9.26255570453623e-09	8.57153964403908e-07
AT5TE37350	71007.7747357244	-1.58844077439607	0.276690282299467	-5.74086216977026	9.41957358905511e-09	8.64820693294351e-07
AT1TE16500	234.282143403791	-1.97163127550069	0.345656598157954	-5.70401747285527	1.17016074147395e-08	1.06594330043642e-06
AT1G36060	70.1174893782882	-3.07496510120465	0.539953853171118	-5.69486648376626	1.23468503388471e-08	1.11600213140277e-06
AT1G50440	1540.21792153094	1.70620297073951	0.301138921314469	5.66583344089814	1.46311598254711e-08	1.31230248896149e-06
AT4G01985	77.6692157066122	-2.83938271390589	0.503521914917391	-5.63904495472005	1.70995894517144e-08	1.52199399241977e-06
AT4TE21065	190.288390138745	-2.11580893686378	0.375632539638069	-5.63265615620632	1.77455040439125e-08	1.56751952387893e-06
AT4G15417	281.689061750554	6.32966855963794	1.12507666480175	5.62598866162892	1.84448461898473e-08	1.61704441032797e-06
AT2TE17850	211.591181895274	-2.07306147547187	0.368592305884531	-5.62426681831308	1.86297512742758e-08	1.62106641685117e-06
AT4TE21025	151.120414386339	1.95823179452584	0.349149875905196	5.60857078768532	2.04004256781825e-08	1.76199232153784e-06
AT2TE00040	73.6285880853915	-2.92514632914224	0.522263545788182	-5.60090083394143	2.13240707355242e-08	1.82822547629568e-06
AT2G47275	9184.10228721847	1.45391190016006	0.260043608382375	5.59103109360869	2.25725150836518e-08	1.92113522536773e-06
AT5TE20425	234.409031111681	-1.86263500938732	0.335566122175265	-5.55072424270076	2.84488533095598e-08	2.40372195354686e-06
AT1TE58490	463.679026682776	-1.68632054079952	0.303951173555642	-5.54799812441196	2.88958975952952e-08	2.42392925151901e-06
AT1TE67155	268.616087223826	-1.81435179322481	0.331406827707608	-5.47469648038021	4.38262133124711e-08	3.65009748016723e-06
AT4G10596	6253.20737123368	1.41798293928054	0.259845016107195	5.4570334290944	4.84155231155154e-08	4.00372340090007e-06
AT4TE13555	7039.72528962105	-1.46812860078239	0.273847059537947	-5.36112603604186	8.27047871168675e-08	6.79111139283574e-06
AT4G21366	3099.0491262806	1.5445086618255	0.291472453524559	5.29898672464212	1.16447099522954e-07	9.49491734571778e-06
AT1G11735	7456.76970744384	1.53404463091355	0.290498194750912	5.28073722533429	1.28665113180306e-07	1.04183001366831e-05
AT1G62035	7550.01590329503	1.51198674067903	0.28925445934644	5.22718558633566	1.72109725404735e-07	1.38399958497876e-05
AT1TE67115	239.625139990663	-1.73435933244286	0.332085497093365	-5.22262895436006	1.76400630611048e-07	1.40878859789371e-05
AT3TE90550	237.486724707859	-1.79242028453362	0.345431583756075	-5.18892993235769	2.11505955899683e-07	1.67765948693218e-05
AT3TE90560	452.481477982973	-1.54624427858287	0.299261939553944	-5.16685910974039	2.38060573801525e-07	1.87553127738228e-05
AT1TE67160	317.738570475306	-1.60965882022753	0.312276540781648	-5.15459411776	2.54180873006347e-07	1.97855508820105e-05
AT2TE00090	162.473344232054	-2.15966246230516	0.418999155312434	-5.15433607663188	2.54531100540444e-07	1.97855508820105e-05
AT5G21125	50.4697940416036	-5.70443050782562	1.10716901118047	-5.15226713376264	2.57356084910982e-07	1.98726619209407e-05
AT3G10745	21316.3347211946	1.88146250071072	0.366005072530902	5.14053668081846	2.739548334079e-07	2.10152194574745e-05
AT1G49260	123.573604240825	2.77481772470005	0.541600715834772	5.1233642119974	3.00131809811802e-07	2.28727902118013e-05
AT5G59505	832.125580028676	1.83471509600778	0.360814287898236	5.08492916590166	3.6776329486889e-07	2.78449351829302e-05
AT1G21202	330.458361373968	1.50449090779124	0.296739938432795	5.07006544429805	3.97678931934662e-07	2.9915718363601e-05
AT4TE00215	250.937253470617	-1.78536562126596	0.353178398027313	-5.05513822826698	4.30079155152577e-07	3.21456599299939e-05
AT5TE51225	903.561964291529	1.48288115924778	0.295907234937993	5.01130416618073	5.40623830869509e-07	4.0150788967761e-05
AT2TE27040	94.7451794665659	-2.52930826761603	0.506786933543962	-4.99087111407663	6.0107596371103e-07	4.43578844105735e-05
AT2TE08225	341.700571145911	-1.53965814082861	0.309561430385186	-4.97367562526383	6.56952010902711e-07	4.80250721244459e-05
AT4TE34435	997.205356881457	1.47118720329446	0.295830743659003	4.97307069947492	6.590061354984e-07	4.80250721244459e-05
AT4TE12615	17557.1673733006	-1.26987091534569	0.256780251356829	-4.94536051209422	7.60030763599897e-07	5.50432217613341e-05
AT2TE00115	16231.505486907	-1.26645014413824	0.257327680289158	-4.92154649944824	8.5862995325361e-07	6.18001558946734e-05
AT4G35280	46.1269933750134	-3.08624636645207	0.629051489528821	-4.90619038000174	9.28623926850474e-07	6.6427944705991e-05
AT2TE12990	187.040083743122	-1.66594822950257	0.340533999733029	-4.89216416219417	9.973320244809e-07	7.09078744234591e-05
AT4G20690	1327.31288448089	-1.37324442407023	0.281386279920043	-4.88028209641366	1.0593420279726e-06	7.48601699767306e-05
AT1G66725	628.178484165929	1.72291433424003	0.353632167172135	4.872052076081	1.10445046237906e-06	7.75776650080711e-05
AT3G42170	57.4499785771702	-2.53360483187702	0.520511812224769	-4.86752610098875	1.13003910878398e-06	7.88997365773727e-05
AT1TE69805	590.930785930721	-1.45775707205614	0.299809030887527	-4.86228539460846	1.1603815512006e-06	8.05360052797561e-05
AT1G55591	10541.0960006268	1.67480576881727	0.344610047802019	4.86000271756284	1.17384141558416e-06	8.09881118681145e-05
AT5G17165	1087.16430478018	-1.29703517674569	0.267976208909251	-4.84011316536285	1.29765213970279e-06	8.90036702878503e-05
AT1TE57770	551.918968536636	-1.39637232644528	0.289560647400172	-4.82238294113046	1.41853279084887e-06	9.67256862064199e-05
AT5TE41100	62.4548796770763	-2.46693097093902	0.512322161839547	-4.81519472450937	1.4705641835301e-06	9.96905719765171e-05
AT1G76062	888.969870617093	1.3319337849582	0.277323175612541	4.80282176928153	1.56445130651334e-06	0.000105442209444772
AT5TE37745	92.4403843810373	-2.31374269699135	0.48243998013865	-4.79591823282638	1.6193132859263e-06	0.000108512602953452
AT1TE01370	486.839172636332	-1.50575666342078	0.315832858553835	-4.76757443894686	1.86457112477559e-06	0.000124233710370762
AT2TE08255	231.019808279669	-1.5993121186941	0.336817050041871	-4.74831104451299	2.05122403585049e-06	0.000135893592375095
AT5TE93875	190.553084704707	-1.81345710729157	0.382150130926365	-4.74540490904868	2.08089653422746e-06	0.000137080528751933
AT4TE08875	142.33235949127	-1.74035360097385	0.367217622335398	-4.73929761296776	2.1446031870455e-06	0.000140483557083992
AT2TE00020	197.664448871697	-1.6080167977747	0.339727547690659	-4.73325406993163	2.20948632888442e-06	0.000143925198853589
AT1G76065	937.703506345401	1.30220719629924	0.276605301942751	4.70781719349962	2.503834858998e-06	0.000162192858088426
AT2G24390	7324.81031082733	1.7061872300907	0.363893422013764	4.68870039103419	2.74945590618546e-06	0.000177119645669185
AT5TE43180	45.2912621088127	-3.51882389382791	0.75111515011755	-4.68479951879178	2.80234092540885e-06	0.000179534588957512
AT5G04275	921.860242923655	1.672927052775	0.358767029497328	4.66298994954734	3.1164797898876e-06	0.00019856914945404
AT1TE16505	162.075272100342	-1.83450778474426	0.394881941940542	-4.64571202149448	3.38905498209138e-06	0.000214762940712965
AT5TE27655	72.6126262205054	2.45698601716256	0.529365539315422	4.64137884823396	3.46091918861504e-06	0.000218131447239197
AT5G23030	341.713760963448	-1.66623064639148	0.362829693863355	-4.59232161692641	4.38342144323079e-06	0.000274179642443639
AT1TE69800	174.625599854088	-1.62107331150711	0.353046884353686	-4.59166581932811	4.39722068069987e-06	0.000274179642443639
AT2TE00025	133.395357299805	-1.70960405111074	0.37311436063821	-4.58198405493284	4.60585021681828e-06	0.000285660710255857
AT2G34208	720.260094234584	-1.40478844873381	0.307385855885846	-4.57011414752768	4.87458635049329e-06	0.000300728448924612
AT5TE37690	1051.70489999451	-1.27971722056096	0.280529121635937	-4.56179812312583	5.07173992400582e-06	0.000311165027710409
AT2G44940	72.8423866098235	-2.16888603084467	0.475554706571865	-4.56074979570602	5.09712867004186e-06	0.000311165027710409
AT3TE92030	516.417752763084	-1.36036745271008	0.299263071453477	-4.54572442267257	5.47466282119141e-06	0.000332471710911937
AT2G10606	369.645736939447	1.41869582258215	0.312479484293715	4.5401246926299	5.62209694899468e-06	0.000339656219820093
AT3G52340	5409.11280173327	1.46386231859795	0.323718331676565	4.52202478313936	6.12508860570267e-06	0.000368136768775738
AT2G23347	244.01529008077	1.40236669759544	0.310439235864312	4.51736293478183	6.26145325207706e-06	0.000374402794457531
AT5TE37695	92.6756098713939	-2.08901292099216	0.462555452489445	-4.51624320878551	6.29463663490785e-06	0.000374466648790947
AT2G02741	4100.16241787943	1.18177016966788	0.261863602884851	4.5129225927115	6.39403633099349e-06	0.000378449053905503
AT2G02750	4114.53959551507	1.17857254028167	0.262021647411962	4.4979968331726	6.859671894637e-06	0.000403958456017512
AT3G55930	2906.57491821731	1.33443250571531	0.297557487556778	4.48462082628886	7.3043706919932e-06	0.000427984735018295
AT5G62165	2907.35378877893	1.32206206554673	0.294941163184992	4.48246033639433	7.37873602263151e-06	0.000430180310119417
AT3G60960	176.462892876086	1.64384866204686	0.367353468008794	4.47484182184855	7.64679015872385e-06	0.000443589916670249
AT2G23348	245.485664323689	1.3823163085617	0.309660246573758	4.46397729077711	8.04520950803712e-06	0.000464391796355014
AT4G03438	99.6632734772267	2.04075755090208	0.461063027845912	4.42620081778517	9.5907244696629e-06	0.000550776016482841
AT2G15042	1517.56773924083	-1.20261608634737	0.271830827568129	-4.42413429376755	9.68297762999791e-06	0.000550776016482841
AT2TE08295	77.5388279769857	-2.05563761753787	0.464642893991349	-4.42412365306967	9.6834548352472e-06	0.000550776016482841
AT5G53440	110.758412981612	-1.80591299452353	0.40840100617377	-4.42191122750353	9.78316531732718e-06	0.000553746153398228
AT4G12770	180.624870364484	1.44390958905859	0.328288366609767	4.39829654632553	1.09103837184231e-05	0.00061456557563678
AT3G20950	5776.53128740959	1.30876625178547	0.297924432145081	4.39294703815409	1.11824376181336e-05	0.000626861647247295
AT1G53400	5677.58894231781	1.28198120155927	0.293293936408082	4.37097751579683	1.23691530939731e-05	0.000690068541032186
AT4G13000	65.4056498832347	-2.17935193687837	0.500146588190456	-4.35742637926078	1.31600743245427e-05	0.000730697460115085
AT5G67080	281.016358258836	-1.62639860537577	0.374867210957667	-4.3385992635121	1.4339371636941e-05	0.000792403190932378
AT3G18827	3557.26866633071	1.30052245387263	0.30218919725785	4.30366957414078	1.6799215653376e-05	0.000923956860935682
AT1TE51485	148.662651913091	-1.70942160508984	0.398514699473681	-4.2894819371719	1.79090377180482e-05	0.000980372675081887
AT2G05810	77.729583556488	-1.92689469367577	0.449485738668137	-4.28688727563485	1.81194179565366e-05	0.000987254268099143
AT2TE00100	126.827297342979	-1.92593044041356	0.451570198483432	-4.2649635580064	1.99934831932221e-05	0.00108429773968823
AT2G18320	3023.5606599003	1.26775269243234	0.297794742682564	4.25713590848618	2.07062489730282e-05	0.00111775399548847
AT1G47497	482.345572403049	-1.26482925863098	0.297591349492274	-4.25022185889787	2.13558879209852e-05	0.00114750992239027
AT1TE02540	590.910640681876	-1.40683061853801	0.331571657057407	-4.24291578786676	2.20634245168277e-05	0.00118008958654225
AT2TE85710	100.420974495455	-1.78088256007487	0.422026978592156	-4.21983107813565	2.44485438514604e-05	0.00130168959501383
AT1TE92970	144.563891611563	-1.66680044938892	0.396648428902924	-4.20221114703282	2.64320412934019e-05	0.0014008981885503
AT5TE93065	412.967650272101	-1.39145739229608	0.332236746499033	-4.1881501879568	2.81237385992333e-05	0.00148381353876498
AT5TE40330	216.318680278358	-1.35026345720832	0.323362605050961	-4.17569451790976	2.97078271129992e-05	0.00156033001863771
AT3G47410	272.145311734486	-1.45194801993142	0.34845252100925	-4.16684607626322	3.08842881820212e-05	0.00161484663767877
AT5TE41500	1562.18792775013	1.15923737985779	0.278623753990855	4.16058345081319	3.17435598082532e-05	0.00165236565787604
AT2G43110	101.92659435197	1.76165156227318	0.424722917730737	4.14776667029308	3.35734304375853e-05	0.00173673550638421
AT3TE47590	149.055633309771	-1.52305901456501	0.36726747049471	-4.14700221752131	3.36856801208444e-05	0.00173673550638421
AT2TE30430	487.483736077776	1.16703112952783	0.281473443796298	4.14615003741672	3.38112315565365e-05	0.00173673550638421
AT1G04625	506.548049646094	-1.29475997722702	0.314319632452221	-4.11924628164559	3.80113706772465e-05	0.00194391483375743
AT3TE67755	313.777519545777	-1.28721335328689	0.313038430487242	-4.11199785049828	3.92249952226563e-05	0.00199722028076931
AT2TE13010	177.738948925394	-1.48349606233465	0.362405280785639	-4.09347253196382	4.2496043961769e-05	0.00215436466345316
AT4G21380	409.53913251784	1.40862673739408	0.344380681578373	4.09031868726793	4.30780862685608e-05	0.00217441768784164
AT1G47770	98.8703302021238	-1.61605167656998	0.400130633483812	-4.03881018181368	5.37230170336051e-05	0.00270004473539584
AT3TE92795	372.093866843025	-1.25542988662692	0.312267794477647	-4.02036299877472	5.81085343895887e-05	0.00290792064799401
AT5G03552	372.58748912894	1.14994868779585	0.286720948008436	4.01068947275528	6.05416931123136e-05	0.00301115970753114
AT5G09445	190.369488658227	-1.57618149790178	0.393051009602165	-4.01011944861088	6.06880387023857e-05	0.00301115970753114
AT3G53950	186.20102767204	-1.50936289735899	0.377186264920673	-4.00163801743	6.29054845646906e-05	0.00310795741535717
AT4G25590	143.581264694809	1.51672193903066	0.37943947877533	3.99726971986677	6.4077275842792e-05	0.00315249382416437
AT2G38325	3896.36169866257	1.13670261753009	0.284507957460733	3.99532803115699	6.46047380771755e-05	0.00316508926882297
AT1TE71640	71.7677137174053	1.63273999757891	0.40928374651286	3.989261756642	6.62792508391392e-05	0.00323354002001825
AT3TE79695	3820.06977128937	1.10973710512295	0.278878142914609	3.97929035787775	6.9121280793101e-05	0.00335814222519816
AT2G29740	162.822743448293	1.33317959656326	0.336370394961671	3.96342727104498	7.38813785724378e-05	0.00356915638909951
AT5TE33985	203.625994376633	-1.30972458582706	0.330505109033976	-3.96279679202303	7.40768307171597e-05	0.00356915638909951
AT5TE66645	148.454521293749	-1.76995020727861	0.446769856577186	-3.96165985959446	7.44305229469163e-05	0.00357143990765862
AT5G39370	1264.94582833029	1.63267001010869	0.412629620446289	3.95674456996772	7.59780965540611e-05	0.00363054222714491
AT2TE23940	864.300125401018	-1.06291870437243	0.268700079258364	-3.95578113451317	7.62849781861494e-05	0.00363054222714491
AT1TE59150	47.8337263682571	-2.79731240816569	0.708564898576977	-3.94785631320939	7.88541056500729e-05	0.00373755638975549
AT3G42723	99.9985971975041	-1.55653817209388	0.394752786778165	-3.94307076283818	8.04449065494151e-05	0.00379752068974162
AT1TE43195	101.441665422828	-1.79672918341355	0.455882533089192	-3.94121084490426	8.10713237524112e-05	0.00381165981835933
AT3TE60850	54.8879077184421	-2.1132108397839	0.536517893394125	-3.93875183997179	8.1906592180688e-05	0.00383546532058965
AT4G34750	615.945184757499	1.38751462685685	0.35239890892036	3.93734087062802	8.23895323662583e-05	0.00384264778956229
AT3G05520	273.227641671084	1.31334706686229	0.33387147751186	3.93369052262224	8.36514753430015e-05	0.00388596096613306
AT3TE61325	137.435825717647	-1.56472639303916	0.400638519277924	-3.90558150988398	9.39990664064476e-05	0.0043493218821396
AT3G26934	83.2671060048859	1.8346438890798	0.469932006103839	3.90406242871317	9.45913638389428e-05	0.00435942807257736
AT4G03455	2429.77928105826	1.02267086090067	0.262195439440583	3.90041437441713	9.60281855083745e-05	0.00439451329102094
AT5G58465	2369.42748597005	1.08721524713763	0.27875761457576	3.90021721484544	9.61064227453122e-05	0.00439451329102094
AT4G12780	179.56719787372	1.30197259811476	0.334876526495127	3.88791836723051	0.000101107617224241	0.00460513600326035
AT4G08740	41.4248092430166	-2.36114913440533	0.608144191306553	-3.88254819853262	0.000103367519010054	0.00468974813874409
AT5TE54685	155.759753568954	1.65549082765965	0.428159146145502	3.86653150484624	0.000110394208593692	0.00498913361318779
AT1G18075	1074.45226778556	1.40557971427911	0.364530503151497	3.85586309548136	0.000115322018090596	0.00519171710786237
AT5G66045	341.450965325554	1.48083798538813	0.384154181381684	3.85480116359012	0.000115823725314602	0.00519424860449331
AT3TE53105	112.213429550122	-1.46906486343002	0.383316311196259	-3.83251330694836	0.000126840735982262	0.00566652483353708
AT3G42550	442.891548986936	-1.16292208128951	0.303580469482655	-3.83068806524771	0.000127785421052142	0.00568693896743502
AT1G14071	143.370119038185	1.54766769811062	0.405020535136895	3.82120797304146	0.000132799601134456	0.00588761729744396
AT4G03445	2548.02113294938	1.00221531236556	0.262635656426658	3.81599104250125	0.000135637424783318	0.00599065292792988
AT5TE36475	1363.50707300666	1.09520842001732	0.287104464207329	3.81466872359892	0.000136365741551195	0.00600009262825259
AT5TE66505	328.051011083208	-1.23088435797491	0.324541154497536	-3.7926911299758	0.000149023469404475	0.0065323821550984
AT1G32582	187.180265701869	1.32646344772012	0.351242040690088	3.77649396727683	0.000159051410065317	0.00694584060435054
AT5TE47225	81.5997861596863	-1.68404858615788	0.446675970831108	-3.7701794950475	0.000163130178359493	0.00709738014802869
AT4TE31215	824.025016903872	1.01614265708437	0.270175129933074	3.76105179383493	0.000169200386940888	0.00733411342650836
AT5TE55330	863.17068935569	1.0492864129211	0.279184397339225	3.75839919036076	0.000171003909067936	0.00738101944212516
AT1TE40605	299.627792534494	1.2445957145181	0.331220626341579	3.75760328776922	0.000171548565078552	0.00738101944212516
AT5TE93870	39.3520937093394	-2.25331618535806	0.600903072815753	-3.74988294667777	0.000176917133512677	0.00758402123808021
AT5G53588	226.547288708964	1.30976811390496	0.350184911758018	3.74021858146195	0.000183860296518443	0.00781572368148887
AT5G53590	226.547288708964	1.30976811390496	0.350184911758018	3.74021858146195	0.000183860296518443	0.00781572368148887
AT5G22960	2086.56114104477	1.4055684918328	0.375863364234773	3.73957300865016	0.000184333105695492	0.00781572368148887
AT3G51375	1423.70137558304	1.63665052780229	0.437799455734863	3.73835669817156	0.000185227022755342	0.00782517059901191
AT1G78478	128.620004583137	1.38911183378484	0.372285504691395	3.7313078706525	0.000190488258496908	0.00801838662120557
AT4G00150	1245.67637945468	1.64852397260616	0.442619598596562	3.72447125665747	0.000195725009784008	0.00819335481777936
AT3G60630	1254.81659673547	1.63449723471314	0.438911472197352	3.72397929480004	0.000196107016539079	0.00819335481777936
AT5G44060	50.3622344787841	-1.92956814406767	0.518262334020244	-3.72314948898505	0.000196752945881494	0.00819335481777936
AT1TE51795	81.7235312360585	1.53018139382791	0.412202560666755	3.71220739471578	0.000205459521851	0.00852547339780304
AT5G52797	72.28220684993	1.59255888145626	0.429249377516599	3.71010178435186	0.000207175936272664	0.00856621069836618
AT1G02740	75.2602455301078	1.62281227589176	0.437663096615689	3.70790292451079	0.000208982734304781	0.0086103840353136
AT1G24530	108.721271481758	-1.5332599895124	0.413833088641567	-3.70502028860336	0.000211373813086855	0.00867823472039692
AT3TE70355	150.586002202406	-1.35448799096892	0.365964718144859	-3.70114364530838	0.000214629923990549	0.00878099969729754
AT1TE55000	1891.43274704427	1.06629214174879	0.288993991443866	3.68966889734074	0.000224546110232633	0.00915457218640733
AT2G45160	1259.56460248702	1.61140976497966	0.437217949674491	3.68559837531683	0.000228165925375119	0.00926973759537938
AT5G15833	73.7710853087743	1.51368983035926	0.410866969838281	3.68413608656607	0.000229479621505536	0.00929073745400887
AT1TE93285	506.340519824441	1.19284778159072	0.324194409308604	3.67942119709792	0.000233763908083963	0.0094314434887855
AT1G60073	19899.3100896122	1.12131294118276	0.30502289601256	3.67615990747328	0.000236771141459648	0.00951983279110171
AT5TE54675	295.322330488433	1.22261444262508	0.332923188652919	3.67236192700197	0.000240319000257029	0.00959953767012306
AT1TE45350	912.666968568516	1.09091362460991	0.297067459369122	3.67227574143149	0.0002404000857355	0.00959953767012306
AT5G56070	289.835412885665	1.64736428522256	0.450751664751931	3.65470482761097	0.000257478034471697	0.0102463955015017
AT4TE13150	651.854141657169	1.06426994510889	0.291951697356423	3.64536310199835	0.000267014526933475	0.0105587222280406
AT2G07771	3367.44872471952	1.12437955178252	0.308451048071581	3.64524471163926	0.000267137483471009	0.0105587222280406
AT1TE42925	248.410301716846	1.26899363069275	0.34900564851527	3.63602605313486	0.000276876341376466	0.0108612905404
AT5G26692	114.347006456005	1.39674658660858	0.384156422349	3.63587982746169	0.000277033465828613	0.0108612905404
AT3TE64600	981.396356874068	1.01581346148719	0.279425416502231	3.635365294263	0.000277587013811251	0.0108612905404
AT3TE18040	644.354539037772	-1.10036821512773	0.303237973623605	-3.62872829539998	0.000284820811930705	0.0111070590873312
AT1TE11535	141.700620736838	-1.3815768196204	0.380920887824558	-3.62693898859313	0.000286801026817998	0.0111469999089929
AT3G01240	281.960000946229	1.13074905580062	0.312296003141535	3.62076057466593	0.000293738247356815	0.0113786975554168
AT1G35610	79.0213118876268	-1.53045435177203	0.422893991457267	-3.61900235682749	0.000295740945366972	0.011418342460195
AT5TE41645	72.8384860638048	-1.73208638106865	0.478990517876242	-3.61611830803752	0.000299053739136803	0.0115081405885648
AT4TE22030	45.2090008116026	1.73223642811709	0.47973930414355	3.61078696941361	0.000305269328656833	0.0117086854346667
AT1G72800	122.320317565572	1.32957123531865	0.368771365539544	3.60540801038979	0.000311662877777563	0.0119147185406111
AT1G72330	307.42570248753	1.13662704815024	0.315420050550825	3.60353454438082	0.00031391900399927	0.0119524919478359
AT3TE65465	334.607647788773	1.14615952851095	0.318122439601435	3.60288802621699	0.000314701117322953	0.0119524919478359
AT4TE17080	1213.27776729061	0.971696337091775	0.270457791695891	3.59278366875217	0.000327164190275842	0.012385501489014
AT1G70645	206.141436660478	1.19116864813903	0.332457631123874	3.58291865376132	0.000339776442623349	0.0128213376083762
AT5G27720	41.4448464635711	2.09454503451592	0.585230997977557	3.57900562641803	0.00034490404345735	0.0129728424087507
AT1TE71830	131.441465662632	-1.28561555599337	0.360880966862728	-3.56243657616445	0.000367428693102321	0.0137756223844793
AT3TE46140	81.3472323662487	-1.56622838307122	0.439883828380577	-3.56055004076249	0.000370078774596637	0.0138305080506307
AT2G35750	144.129404978359	1.25998138816562	0.35430581021115	3.55619736355645	0.000376261458932723	0.013984032804402
AT3TE27635	190.294103062387	-1.30719839547332	0.367606583675496	-3.55597112109192	0.00037658544601906	0.013984032804402
AT5G45573	380.103188476283	-1.09616528674498	0.308580093822213	-3.55228774859513	0.000381896983054252	0.0141362502298812
AT1TE55070	1762.31203433302	0.998349891336919	0.281716330204518	3.54381263809644	0.000394385408022689	0.0145523223340018
AT2G06555	202.126585765651	1.28052315305846	0.361608591197298	3.54118564721764	0.000398333199086015	0.0146458349344983
AT5TE11315	3288.25108677939	0.977760570752752	0.276167751652092	3.54045888741024	0.000399431861849954	0.0146458349344983
AT2G15530	155.02328371586	1.24668119168452	0.353505027862549	3.52662930771457	0.000420885586325036	0.0153840938449841
AT4TE15900	191.368727501362	1.19859882387976	0.339952223151484	3.52578610243612	0.000422227838638932	0.0153849268704061
AT1G73687	4065.65813993894	1.31301693969155	0.373498004708392	3.51545904700799	0.00043899446015159	0.0159460293002104
AT2G46255	221.867921140687	1.39974513599015	0.398273193816013	3.51453514252024	0.000440524380174123	0.0159519076795971
AT4G27930	407.587831847317	1.56415903910663	0.446033287694246	3.50682131190812	0.000453493564373955	0.0163706964724468
AT3G60750	43.1970569246528	1.7160566268598	0.4898675664251	3.50310317415592	0.000459871300548142	0.0165496893962696
AT3G61160	973.704699468446	1.04979571497527	0.299835180195576	3.50124263033615	0.000463094024190749	0.0166143886832743
AT5TE41475	673.100129236718	0.973157642248769	0.278655347789337	3.49233434767767	0.000478818487335427	0.0171258391482548
AT3G23125	9062.34976998823	0.973405583695744	0.278915435007129	3.48996671220747	0.000483080716465614	0.017225446954095
AT5G12960	675.91988915043	1.12631313020833	0.323278861675487	3.48402962189017	0.000493924818871072	0.0175584249635265
AT2G10557	202.193827377415	1.53723695651075	0.441588440661486	3.48115307141649	0.000499260082738929	0.0176941415341517
AT4TE22340	53.4516368621405	-1.89926726990448	0.546063603884812	-3.47810631654022	0.000504969596521962	0.0178422590771093
AT5TE53870	166.761300885114	1.22869666113753	0.35339743307808	3.47681263679711	0.000507412270093938	0.0178744020220402
AT5TE71885	69.8346970523901	1.44346278181273	0.415904817917949	3.47065655319602	0.0005191875943768	0.0182341185254021
AT4TE14975	1248.22464597271	-1.00633749563458	0.290072253027752	-3.46926493358296	0.000521884538416859	0.0182636059384449
AT1G78476	139.968331367223	1.27777719827115	0.368383156086177	3.46860918356494	0.00052315989566386	0.0182636059384449
AT3G06890	85.3585089069893	-1.54933041977046	0.447862912681814	-3.45938539651125	0.000541409620480706	0.0188442870889702
AT1G06580	198.412728220496	1.13126984768332	0.328332731623998	3.44549823615768	0.000570007687163369	0.0197806239057288
AT1TE58390	61.2398069995957	-1.65993344237951	0.483584735713376	-3.43255963183123	0.000597912379734594	0.0206712245212178
AT2TE11535	136.770454534347	-1.24264434484883	0.362079189034638	-3.43196842702263	0.000599217314594478	0.0206712245212178
AT1G03200	87.597593329994	-1.45100984707451	0.42505120407373	-3.41372952991992	0.000640801560928382	0.0219765305996528
AT1G67481	6295.91846460245	1.20926238697589	0.354236010332786	3.41371953077229	0.000640825077519893	0.0219765305996528
AT5TE55120	59.6033746938426	-1.75399068912254	0.515140669747587	-3.40487713769906	0.000661938279237579	0.0226340185803817
AT3TE18045	119.126341386349	-1.29881539471748	0.38174077338371	-3.40234914705318	0.0006680922671296	0.0227776486395647
AT1G70650	210.380252397147	1.12250235497509	0.330831994374614	3.39296795371018	0.00069139726305497	0.0235034754729474
AT2TE24625	122.164413411543	-1.40920004562879	0.41554518879767	-3.39120770404332	0.000695853439141118	0.02358619505926
AT2G21920	88.2358860321394	1.39125081921149	0.410376583300593	3.39018081397795	0.00069846538501548	0.0236061054761754
AT5G40384	1756.36145279428	0.889164131662579	0.262876572338039	3.38243961321583	0.000718450713790324	0.024211373765304
AT5G56750	189.008699806424	1.26708354325819	0.374880321299845	3.37996814253881	0.00072494232096608	0.0243181912678085
AT2TE03295	60.0748796333718	1.51313332188061	0.447719430356446	3.37964631259347	0.000725791643327388	0.0243181912678085
AT3G26520	67.5485946124277	1.6377017429833	0.485490895822806	3.37329032753072	0.000742755910036594	0.0248152834126839
AT4G26380	5776.90681902343	1.46023528192104	0.433068156148084	3.37183711429875	0.000746685947427665	0.0248753089914474
AT3TE47275	33151.4375022111	0.920933267782942	0.273409360077793	3.36833116291596	0.000756246997869138	0.0251220512682454
AT5G39880	420.617564339673	1.05073305752564	0.313119674093284	3.35569159162003	0.00079166799310076	0.0260550363410878
AT2G07708	33780.9885494378	1.2872658090071	0.383627843755129	3.35550672340865	0.000792197308402731	0.0260550363410878
AT1TE89750	159.008128567857	-1.29262770121197	0.385254335450636	-3.3552580263632	0.000792909896808472	0.0260550363410878
AT3G26782	66.6775387162491	1.95929902075089	0.58397074708329	3.35513213724633	0.000793270831997099	0.0260550363410878
AT1G66290	42.1292006405251	1.784915098779	0.532129364519553	3.35428791904869	0.000795695222744336	0.0260612536438173
AT4G15530	383.985046811764	1.08354132406273	0.323407679722759	3.35038835500627	0.000806983329632857	0.0262837967693504
AT5G28450	317.140693158879	-1.05018738344818	0.313452911736942	-3.35038324457973	0.000806998219847981	0.0262837967693504
AT2G35765	373.570923300651	1.19924572888346	0.360399567206914	3.32754486410064	0.000876148801440159	0.0284565321024854
AT2TE20450	309.373973481815	-0.99322701882971	0.298664922289874	-3.325556316472	0.000882422717354209	0.0285806913454169
AT1TE19285	3730.36478412084	-0.964066089430952	0.29007489912123	-3.32350745394225	0.000888930470985545	0.02871171548945
AT1G63710	78.6245078861978	-1.55933649013694	0.469320134016222	-3.32254334965958	0.000892008100281766	0.0287315316278602
AT2TE86120	431.623466011555	1.17369986341035	0.354113359864906	3.31447495756194	0.000918154037169536	0.0294922205878699
AT3G42725	40.725525536472	-2.03082372524366	0.613379452874226	-3.31087667793149	0.000930041860433583	0.0297719098976155
AT2G07681	3733.37137605189	0.990623722237668	0.299255178975824	3.31029767179968	0.000931968019951086	0.0297719098976155
AT3G55512	658.900677441003	1.03540571949948	0.313666938050609	3.30097180765802	0.00096350563666424	0.0306952888620356
AT4G39080	63.2304069648559	1.45207647205782	0.440039973709186	3.29987400875872	0.000967282432210765	0.0307316434865873
AT2G07706	771.43599828471	1.1099530149839	0.336595206884109	3.29759007936813	0.000975183887065392	0.0308378715006929
AT1G64740	750.29687524534	1.07306305690464	0.325429045852558	3.29737947666422	0.000975915487457605	0.0308378715006929
AT2TE87240	492.176055035104	-0.972628767964831	0.295230663350839	-3.29447069259538	0.000986072267529496	0.0310746017280917
AT4TE26550	886.298437822619	0.922616005187127	0.281042615508933	3.28283311595427	0.00102769484999495	0.0322989809998413
AT2G28401	130.851569379529	1.14590729445025	0.349423377245298	3.27942367074601	0.00104019344792063	0.0326039129106304
AT5G15110	249.663920226078	1.02526610669183	0.313511825461087	3.27026294840381	0.00107447555682928	0.0335881635191138
AT1G08140	165.686098626201	1.09352294787378	0.334671364552574	3.26745298133208	0.00108519890762038	0.033818629574449
AT3G55850	793.980857354979	1.02721787491381	0.314449579708795	3.26671727742517	0.00108802279370808	0.033818629574449
AT1TE50170	750.990448583407	-0.898139192756549	0.275054939339744	-3.26530835953169	0.00109344968692687	0.033818629574449
AT1TE50640	750.990448583407	-0.898139192756549	0.275054939339744	-3.26530835953169	0.00109344968692687	0.033818629574449
AT3TE66060	105.388538964015	1.2468083770663	0.382426988709942	3.26025205823527	0.00111313242679112	0.0342763717863054
AT2G02440	106.906501465812	1.51644552992079	0.465167592115751	3.25999823638498	0.00111412906578128	0.0342763717863054
AT3G11120	36.5735117985127	1.78390640639353	0.547689447333475	3.25714949425958	0.00112537147200188	0.0345311351672155
AT2G46500	106.616530650568	1.231265761187	0.378607273579573	3.25209219977709	0.0011455885435369	0.0350592189439375
AT1G29265	1698.79885138388	1.02028090596056	0.313881575391572	3.25052817989633	0.00115190851871165	0.0351603490266435
AT5TE51155	158.517833991378	-1.22550043579774	0.378163320834944	-3.24066446500407	0.00119251459397481	0.0363047523909824
AT5G27420	110.458166500984	-1.37943995738022	0.426329274512643	-3.23562100903608	0.00121378424754805	0.03685605293336
AT3G20530	121.157293222416	1.28943860732792	0.398660319612494	3.23442927197089	0.00121886105504239	0.036914077666998
AT1TE42150	166.481885761996	1.21106169728459	0.374852511740843	3.23076852722775	0.00123457876325581	0.0372159684830496
AT3G11435	637.822324356742	1.0212096416205	0.316103124409761	3.23062179004821	0.00123521267606691	0.0372159684830496
AT1G03240	72.7604332567952	-1.48322303000695	0.460416511808315	-3.22148096770356	0.0012752993228625	0.0383247167643731
AT3G12630	386.808358771067	1.14289215795282	0.3556310406255	3.21370191967114	0.0013103562815264	0.0391133300360627
AT2G37670	141.896704214374	-1.21623335454032	0.378480206648304	-3.21346620820909	0.00131143228731293	0.0391133300360627
AT3TE47280	28310.222312555	0.894207396208587	0.278272074513113	3.21342843249063	0.00131160480652663	0.0391133300360627
AT3TE35700	165.013339973806	1.52550592971969	0.475555462416752	3.20784020010439	0.00133735784730448	0.0397795727029852
AT4TE80770	228.981807256874	-1.25366757012138	0.390928446190156	-3.20689778996427	0.00134174658492868	0.0398085627996651
AT5TE40445	116.483406149283	-1.238001260918	0.386623447745142	-3.20208530584022	0.00136436587830007	0.0403769191395403
AT5G19473	118.236553876004	1.19973923449176	0.375236310431215	3.1972898174834	0.00138725468686723	0.0409503535414477
AT5G59030	165.356798269609	1.1873464470224	0.371994795676736	3.1918361784131	0.00141371489607406	0.0416260497177362
AT4TE52340	243.408164313247	1.05774057536697	0.331846248570578	3.1874417141166	0.00143537384335805	0.0421573274900626
AT5TE29485	787.007806631311	0.918753171544412	0.288352768714103	3.18621241488873	0.0014414871964298	0.0422305042974158
AT5G11790	98.8954321709715	1.23102844065609	0.386578039336492	3.18442414051501	0.00145042321372983	0.0423858011831824
AT5G27000	72.5155078478107	1.35229957539113	0.424895843316218	3.18266134315821	0.00145928186803782	0.0425380664533025
AT3TE51550	209.393222898702	-1.02855470718317	0.323249587328723	-3.18192117639798	0.0014630162993099	0.042540573690657
AT4G28000	107.837859102064	1.22319736930272	0.384590102403292	3.18052222784464	0.00147009860723095	0.0426401735331168
AT1TE84245	1183.26429073704	-1.11526409240729	0.350857289421329	-3.17868297462681	0.00147945807558283	0.0428051641719497
AT3TE13105	62.0613151814269	-1.57534776848674	0.495897421385873	-3.17676136343712	0.00148929526684796	0.0429831257709091
AT1G67480	100.115519623434	1.21022630761486	0.381511420995946	3.17218893331038	0.00151294543961257	0.0435578859898334
AT5G13887	691.354294462256	0.858348801268875	0.27070209827286	3.17082433695688	0.00152007034276916	0.0436552221593311
AT1G60240	85.1213826793703	1.24461399363772	0.393077189616627	3.16633482307027	0.00154372991245302	0.0442257758702758
AT3G13857	1510.67482140207	0.836338643188633	0.264254972041392	3.16489274252002	0.00155140129071565	0.0443286726878767
AT2TE08035	187.994784200968	1.1008691250768	0.347977497517389	3.16362159315141	0.0015581924681038	0.0443286726878767
AT5TE56015	342.24795642063	0.935034841850513	0.29556769592857	3.16352177430271	0.00155872691269549	0.0443286726878767
AT2TE14975	18067.9636451631	0.839020367975467	0.265427055346318	3.16102051797527	0.00157217423509605	0.0445341626880581
AT3G25820	45.192260849606	-1.6328000013352	0.516584933252582	-3.16075807913052	0.00157359134026415	0.0445341626880581
AT3G55860	156.064511818785	1.07801623048382	0.341230626921377	3.15920127161447	0.00158202192657134	0.0445708588869634
AT2G38490	47.1623067501723	-1.65474417193351	0.5238012211605	-3.15910712897417	0.00158253306854227	0.0445708588869634
AT3TE29575	46.2411374887527	1.60170483007475	0.507278191123496	3.15744863095212	0.00159156275602615	0.0447171608078673
AT5G13890	697.776103388701	0.853809996409593	0.270569748876196	3.15560035797005	0.00160168153943397	0.0448932854562503
AT5G20410	145.620925796656	1.16356469025823	0.36914516782671	3.15205179877758	0.00162127509694798	0.0452185729436991
AT2G43230	146.310276917905	1.09582045236528	0.347717016805221	3.15147202870179	0.00162449721458905	0.0452185729436991
AT1G31280	2373.75079101032	1.0548310287709	0.334718675220083	3.15139580448365	0.00162492127473499	0.0452185729436991
AT2G28056	95.650397251541	1.58679885755936	0.504340696992628	3.14628358770452	0.00165359585544455	0.045871172659648
AT1G20375	1700.23577328039	1.22585923102745	0.389679226933111	3.14581621575087	0.00165624045366311	0.045871172659648
AT4TE09210	146.515662989898	1.11559116421567	0.354775503624719	3.14449885298658	0.00166371563548965	0.0459690149521549
AT5TE37730	387.720150700274	-0.919678979465614	0.292885064471522	-3.1400678662979	0.00168908699901512	0.0465597030934192
AT4TE14080	238.680245729456	-1.07020526513303	0.341061949180191	-3.13786180987201	0.00170185091457707	0.0467035470102332
AT5G41765	8630.30768613835	0.788167147640578	0.251186102227539	3.13778167124314	0.00170231625037299	0.0467035470102332
AT1G76135	1700.87753299817	1.22449129299776	0.390427141738854	3.13628629286432	0.00171102086166516	0.0468321672465159
AT5TE36470	952.52983497148	0.940833509124989	0.300198486514966	3.13403814938315	0.00172418438295651	0.0470819435720676
AT3G42050	74.0665718910048	-1.39464133858818	0.445643893682216	-3.12949724737547	0.00175105713150166	0.0476921372733591
AT3TE47265	289.028679678436	0.98557706120844	0.314993077502853	3.128884828269	0.00175471071100095	0.0476921372733591
AT5G24105	178.371850667981	1.08395769595711	0.346912875549542	3.12458191192823	0.00178057938981714	0.0482826876401577
AT4TE16655	316.125151529068	0.920159890146938	0.294619758942008	3.12321174062211	0.00178889001379683	0.0483954931806753
AT3G23650	151.224553658676	1.56804095918838	0.502179017508612	3.12247406705217	0.00179337904250217	0.0484046287860539
AT5G45880	633.757433129129	0.929392907033411	0.297882484904883	3.11999850320228	0.00180851958944524	0.0486539626777797
AT1TE56285	37.0788412888433	-1.92647636706021	0.617539367520268	-3.11960090058062	0.00181096224718322	0.0486539626777797
AT1G14800	497.717688045244	-0.916098283100825	0.293824693009237	-3.11783966731491	0.00182181882592914	0.0487248548881354
AT4TE28600	100.219939024862	-1.54980974238116	0.49708167966083	-3.11781706265785	0.00182195855327848	0.0487248548881354
AT1TE26260	163.1804884233	1.09776750064766	0.35226240418112	3.11633454952299	0.00183114402105678	0.0488584423009659
AT2TE14290	522.539824537756	1.06671479328813	0.342458622144082	3.11487205843903	0.0018402471112002	0.0489892267502153
AT3TE65985	239.882033147002	-1.13817616725824	0.366019040148903	-3.10960917988095	0.00187335035396642	0.0497568681714089
