# Supplementary material for: Targeted suppression of siRNA biogenesis in Arabidopsis pollen reveals distinct Pol IV activities in the sperm and vegetative cell lineages
Source: Research Square preprint supplement (doi:10.21203/rs.3.rs-2947716/v1), 2023-05-31
Supplement: Supplementary file 4 [file c408194a9921106b29bbfc0a.xlsx]

## Sheet: sRNA-seq
sRNA-seq
	Clean reads	Unique mappers (18-30nt)	Multi mappers (18-30nt)	Mapping efficiency (%)
WT Col-0 biorep1	27549075	4642800	20672958	91.8933
WT Col-0 biorep2	26028129	2147268	21958923	92.6159
VC-RTL1 biorep1	28617957	5444662	20714299	91.4075
VC-RTL1 biorep2	28654900	3049544	23966634	94.2812
SC-RTL1 biorep1	26992473	2831493	22471172	93.7397
SC-RTL1 biorep2	23883484	2388378	19475092	91.5422
WT FTL biorep 1	14378458	2669288	10745407	93.2972
WT FTL biorep 2	20443272	877082	6164322	34.4436
nrpd1a-3 FTL biorep 1	15273308	1653255	12438004	92.2607
nrpd1a-3 FTL biorep 2	20487061	1457972	15039740	80.5275

## Sheet: WGBS
Whole-genome bisulfite sequencing
	Median coverage	% mCG	% mCHG	% mCHH	% mCHH (chloroplast)
WT Col-0 pollen	13.0924	0.28509	0.119408	0.0240311	0.00429812
VC-RTL1 pollen	12.6978	0.282538	0.112467	0.0220946	0.00405051
SC-RTL1 pollen	13.4076	0.287444	0.119467	0.0241271	0.00432363
WT FTL pollen	16.7663	0.290522	0.123556	0.0290695	0.00899714
nrpd1a-3 FTL pollen	15.2692	0.290272	0.123183	0.0273566	0.00950039
WT Col-0 seedling	18.9264	0.27002	0.0945906	0.0276753	0.00770745
35S::RTL1 seedling	17.1746	0.273835	0.0991289	0.0252795	0.00813502

## Sheet: RNA-seq
RNA-seq
	Col-0 biorep1	Col-0 biorep2	VC-RTL1 biorep1	VC-RTL1 biorep2	SC-RTL1 biorep1	SC-RTL1 biorep2	WT FTL biorep 1	WT FTL biorep 2	nrpd1a-3 FTL biorep 1	nrpd1a-3 FTL biorep 2
Number of input reads	21244190	25285700	25401740	25313171	25221525	25241702	26035830	25056869	25020918	26068027
Average input read length	200	200	200	200	200	200	200	200	200	200
UNIQUE READS:
Uniquely mapped reads number	20831030	24820372	24844298	24806879	24716218	24725276	24928811	24526547	24405531	25532274
Uniquely mapped reads %	98.06%	98.16%	97.81%	98.00%	98.00%	97.95%	95.75%	97.88%	97.54%	97.94%
Average mapped length	199.32	199.33	199.28	199.29	199.31	199.28	199.26	199.35	199.32	199.35
Number of splices: Total	6906224	8249310	9086910	8250201	7976321	7985773	9079251	8728282	8471444	8034468
Number of splices: Annotated (sjdb)	0	0	0	0	0	0	0	0	0	0
Number of splices: GT/AG	6852584	8184744	9018470	8179973	7916745	7922694	9008946	8652387	8395692	7962909
Number of splices: GC/AG	39070	46734	49142	51546	42625	44722	55604	62189	61654	58211
Number of splices: AT/AC	1172	1440	1504	1361	1452	1445	2194	2732	2496	2781
Number of splices: Non-canonical	13398	16392	17794	17321	15499	16912	12507	10974	11602	10567
Mismatch rate per base, %	0.23%	0.23%	0.25%	0.25%	0.23%	0.24%	0.25%	0.24%	0.26%	0.25%
Deletion rate per base	0.01%	0.01%	0.01%	0.01%	0.01%	0.01%	0.01%	0.01%	0.01%	0.01%
Deletion average length	1.43	1.43	1.42	1.43	1.43	1.43	1.39	1.40	1.39	1.41
Insertion rate per base	0.01%	0.01%	0.01%	0.01%	0.01%	0.01%	0.01%	0.01%	0.01%	0.01%
Insertion average length	1.15	1.15	1.15	1.17	1.17	1.16	1.16	1.15	1.17	1.16
MULTI-MAPPING READS:
Number of reads mapped to multiple loci	143630	175472	194591	186467	179731	178078	413085	314869	371497	283724
% of reads mapped to multiple loci	0.68%	0.69%	0.77%	0.74%	0.71%	0.71%	1.59%	1.26%	1.48%	1.09%
Number of reads mapped to too many loci	1602	2266	9175	5235	2152	2116	2478	3463	3792	7108
% of reads mapped to too many loci	0.01%	0.01%	0.04%	0.02%	0.01%	0.01%	0.01%	0.01%	0.02%	0.03%
UNMAPPED READS:
% of reads unmapped: too many mismatches	0.00%	0.00%	0.00%	0.00%	0.00%	0.00%	0.00%	0.00%	0.00%	0.00%
% of reads unmapped: too short	1.26%	1.14%	1.39%	1.24%	1.28%	1.33%	2.66%	0.85%	0.96%	0.94%
% of reads unmapped: other	0.00%	0.00%	0.00%	0.00%	0.00%	0.00%	0.00%	0.00%	0.00%	0.00%
CHIMERIC READS:
Number of chimeric reads	0	0	0	0	0	0	0	0	0	0
% of chimeric reads	0.00%	0.00%	0.00%	0.00%	0.00%	0.00%	0.00%	0.00%	0.00%	0.00%
