# Supplementary material for: Targeted suppression of siRNA biogenesis in Arabidopsis pollen reveals distinct Pol IV activities in the sperm and vegetative cell lineages
Source: Research Square preprint supplement (doi:10.21203/rs.3.rs-2947716/v1), 2023-05-31
Supplement: Supplementary file 5 [file de3b87736c6bc3c1c1ff4811.xlsx]

## Sheet: DESeq RNA VC-RTL1
Genes and TEs deregulated in VC-RTL1
	baseMean	log2FoldChange	lfcSE	stat	pvalue	padj
AT3G01270	807842.459820676	-2.46327849589534	0.160379438275905	-15.3590667380796	3.07976107697383e-53	3.37350643432884e-49
AT3G13400	2137786.77753711	-2.39851357335715	0.156618736863214	-15.3143462997785	6.13253305640583e-53	3.37350643432884e-49
AT2G26450	124704.233854502	-2.30779183608995	0.156847706149772	-14.713583594817	5.27389398296055e-49	1.93411272001773e-45
AT5G38760	29426.7966470142	3.26438227615418	0.22242538063373	14.6763029778947	9.14419760857783e-49	2.51511155223933e-45
AT2TE28180	5933.67812658218	-3.18940613493575	0.225743607529058	-14.1284449639408	2.53684376020635e-45	5.58207100995806e-42
AT5G67480	9886.96707870335	-2.52534606075379	0.179024416173591	-14.1061544270313	3.48046663277984e-45	6.38201564897397e-42
AT1G02790	689112.59666404	-2.56840025424276	0.184544474158639	-13.9175137372842	4.95854671125936e-44	7.79341870246792e-41
AT5G61960	34899.752731773	-2.79411542923262	0.202321571285346	-13.8102695203564	2.21003172911022e-43	3.03934613545882e-40
AT2G15880	111798.98637753	-2.98891186086919	0.219632115360263	-13.6087195443456	3.55416223247695e-42	4.34476587574572e-39
AT4G04930	53682.0462445308	-2.04227733484958	0.150919572439219	-13.532223169212	1.00924600003337e-41	1.11037244923671e-38
AT1G58120	121757.683729921	-1.94727440039849	0.149419092447484	-13.03229974498	8.01547834929237e-39	7.34885773324289e-36
AT1G58122	121757.683729921	-1.94727440039849	0.149419092447484	-13.03229974498	8.01547834929237e-39	7.34885773324289e-36
AT5G56750	50598.1251879003	-2.09722912445171	0.161218383628294	-13.0086226970684	1.09294191049226e-38	9.24965146095065e-36
AT5G16110	53074.9343524242	-2.09462300933484	0.161275738215716	-12.9878370578788	1.43423312405418e-38	1.1271023450603e-35
AT4G07960	30501.9310430106	-1.96390401595829	0.152554477224078	-12.8734603644155	6.34925711926329e-38	4.65696845507565e-35
AT3G54740	12947.0435126834	-2.18340176964601	0.171245098488042	-12.7501562901578	3.11120889692483e-37	2.13934501774794e-34
AT5G52450	1074.06462054263	-2.53866970545211	0.200965066617791	-12.632393023213	1.39956233997799e-36	9.05763815555165e-34
AT4G15200	4755.05609350798	-2.22814462462354	0.176721661620434	-12.6082145459292	1.90254375006209e-36	1.16287701878795e-33
AT4G35010	275370.438979435	-2.12203290107616	0.169233453200441	-12.5390864568769	4.5622442224918e-36	2.64177952293973e-33
AT5G43185	5101.30732872792	-2.3066914775471	0.18578370040182	-12.416005669809	2.13981030133221e-35	1.17710964676285e-32
AT3G54800	108389.737998007	-2.12426224887494	0.171174959927537	-12.4098889801066	2.30972829599863e-35	1.21007765297985e-32
AT1G58030	11623.4976135129	-2.71077781501002	0.219856251339718	-12.3297736520641	6.26223823987988e-35	3.13168841432538e-32
AT2G46210	85689.4086148458	-1.83433834583563	0.148930719179512	-12.3167225401271	7.36261606127116e-35	3.52189138722197e-32
AT5G07430	416573.540249721	-2.2555342162495	0.185201283261157	-12.1788260671441	4.03041266616321e-34	1.84760833971365e-31
AT4G11485	9846.81283801645	2.89722904877936	0.239311786550721	12.1065037812724	9.75648250773442e-34	4.29363282200377e-31
AT1G47270	40949.1741637821	-1.81939078735717	0.150878788816406	-12.0586253483985	1.74674000130078e-33	7.39139749781197e-31
AT1G52680	2623.44660690878	2.92606491455618	0.24493677054451	11.9462051698132	6.79580592201762e-33	2.76916506496437e-30
AT1G33250	4644.30675360144	-1.84016026170665	0.155368533769883	-11.8438413303953	2.31597068120338e-32	9.10011051235699e-30
AT4G34750	21606.21791202	-1.77149137109772	0.149821928813974	-11.8239792073247	2.93448137373485e-32	1.11328151978727e-29
AT3G02830	2563.01890865784	-2.45062827082711	0.207393943205402	-11.8162962377354	3.21550844903308e-32	1.1792341318754e-29
AT5G12000	97497.787906959	-1.766738341139	0.150079187805175	-11.772040927037	5.43924513910531e-32	1.93040564582053e-29
AT5G46840	8706.15299003285	-1.84968902547018	0.157690920100238	-11.7298384985921	8.9629522627177e-32	3.08157502482563e-29
AT2G18470	36590.5831688048	-2.03466217367018	0.1749303714179	-11.6312688138612	2.85817267458638e-31	9.52897447448465e-29
AT1G13970	77667.1187037619	-2.40200989804393	0.207564515311685	-11.5723532726054	5.69002601842364e-31	1.84122547807932e-28
AT3G17510	4563.06958374052	-2.00142465967428	0.173061648013881	-11.5648075852932	6.21304159755702e-31	1.95302524732349e-28
AT3G05725	18310.4569508465	-2.4755527426612	0.215401386260443	-11.492742853883	1.43482621018943e-30	4.38498832347335e-28
AT4G03290	105314.740796815	-1.72493765590169	0.150393760011179	-11.4694762320822	1.87792461549239e-30	5.5840342215263e-28
AT5TE68375	1945.06395212802	-1.91876621514022	0.167742745558733	-11.4387433492222	2.67735337762073e-30	7.75164259489034e-28
AT4TE30125	2726.55146964412	2.85801929246408	0.250259298939542	11.4202321535094	3.3134765269237e-30	9.34740224338833e-28
AT4TE30130	2759.15085876225	2.85888813353894	0.250677720599958	11.4046359073979	3.96432443050941e-30	1.09038743461161e-27
AT1G68710	686.834071308782	-2.43274749134463	0.213991056494419	-11.3684540428823	6.00415817557511e-30	1.61116459140676e-27
AT5G61710	4599.74214993209	-1.80349386972985	0.160265039881432	-11.2531957753489	2.23350031684588e-29	5.85070725855675e-27
AT1G03050	88568.5307728123	-1.74608277402115	0.155429942624222	-11.2338893300797	2.77967442394791e-29	7.11208790983139e-27
AT3G20580	124583.465166437	-1.73325004363624	0.154478354182232	-11.2200188357237	3.25201175312703e-29	8.13150756997808e-27
AT2G33460	47119.2924866241	-1.84267198867007	0.164902077278021	-11.1743406698472	5.44532399519753e-29	1.33132121322585e-26
AT1G61080	2474.96351935301	-2.22182895801405	0.199155294039009	-11.1562636019048	6.67378545254499e-29	1.59619538149782e-26
AT4TE30120	1099.04920109772	2.96645476272691	0.266808902436013	11.1182750487058	1.02229380103132e-28	2.39303753169077e-26
AT4G26400	15265.4667775048	-1.67396276749332	0.151976076132584	-11.0146465818275	3.24808800278084e-28	7.44488837637391e-26
AT5G28680	44175.0700475497	-1.85946753787167	0.170030605858975	-10.93607546993	7.74817645323533e-28	1.73970280282643e-25
AT4G17790	13432.8007027978	-2.40583992804722	0.220514085307413	-10.9101417476045	1.03095470851773e-27	2.26851274062241e-25
AT3G49870	15137.9283812689	-2.13119537570612	0.195389516764139	-10.9074192464418	1.06229321678913e-27	2.29163724923805e-25
AT5G47540	84491.443967327	-1.67750803367366	0.15383394001415	-10.9046679394635	1.09492301723993e-27	2.31660442993725e-25
AT4G28680	912.404132481766	2.98237376875597	0.274963270771535	10.8464441828451	2.07335177173595e-27	4.30396531936584e-25
AT5G47000	157871.122360342	-2.56967742752873	0.237516589202847	-10.8189387366713	2.80000751178582e-27	5.70475604530881e-25
AT1G11990	8044.87361240515	-1.76664169756279	0.163722628595658	-10.790455251765	3.81893044762035e-27	7.63924959722166e-25
AT3G22750	18819.8067036971	-1.85254227563193	0.171955054712023	-10.7734098234822	4.59655854628384e-27	9.0305959153955e-25
AT5G43300	26185.492778707	-1.89464516094157	0.178514424920988	-10.6134009158092	2.58177081314762e-26	4.98327061162282e-24
AT5G65810	1625.72998259151	2.89933469692551	0.274132040984917	10.5764167023622	3.83339585849143e-26	7.27155538536598e-24
AT5G16500	35136.7698418727	-2.39488289133718	0.226542399831774	-10.5714554675662	4.04172665846222e-26	7.5070560036784e-24
AT3G60300	1307.86954882527	-2.40445154236097	0.227473476831441	-10.5702501049944	4.09401345410565e-26	7.5070560036784e-24
AT3G62170	206168.174607424	-1.74806896952733	0.165901706442538	-10.5367751002175	5.84696096193421e-26	1.05456171316722e-23
AT4G18020	436.245274147959	2.83963244027727	0.270747805178584	10.488108808137	9.79696638609882e-26	1.73848748677192e-23
AT1TE51850	1168.43513878249	2.66334215966076	0.255884292618546	10.4083847132856	2.27041204023155e-25	3.96493226454406e-23
AT4G27580	144300.023287127	-1.79723882750367	0.173028989349142	-10.3869232217334	2.84379103951461e-25	4.88865453386559e-23
AT4G27350	16622.339002501	-2.54956471643603	0.247468697733442	-10.3025745873616	6.86002826704247e-25	1.16113893836925e-22
AT4TE20030	1942.64459839581	-1.82224492980744	0.177692134823338	-10.2550680232365	1.12296907344437e-24	1.87195541606589e-22
AT3G50370	9601.17795927048	-1.67260547171433	0.163639782215647	-10.2212643470164	1.59250036462348e-24	2.6150282106847e-22
AT3TE63500	533.449992249705	-2.64052135904874	0.258518612495481	-10.2140473893148	1.71555925691779e-24	2.75999205214726e-22
AT3G43850	533.091799313444	-2.64052140234762	0.258540548897265	-10.2131809250427	1.73095302307e-24	2.75999205214726e-22
AT5G10650	2278.17378400061	-1.75104204993269	0.171713842442236	-10.1974425883676	2.03562043620165e-24	3.19941371987008e-22
AT3TE63505	532.669389934927	-2.63826687511483	0.258763691443525	-10.1956609924566	2.07329329207631e-24	3.21272856329909e-22
AT1G74490	2303.88377638808	-2.66679129935819	0.26160128141167	-10.1941064086823	2.10672959591694e-24	3.21919986309419e-22
AT4TE18360	204.786848027818	3.67498708041611	0.362832451785854	10.1286063645297	4.12486333194984e-24	6.21667758604275e-22
AT5G54390	1198.98895136016	-1.84100433835931	0.182004850115039	-10.1151388943518	4.73345153148121e-24	7.03749104721031e-22
AT1G03457	9527.6529627773	-1.71474295729453	0.170962307858937	-10.0299474122061	1.12576545883808e-23	1.65142287708487e-21
AT3G43840	514.633949831056	-2.61764823597026	0.262015204460038	-9.99044403306562	1.67828256404719e-23	2.42953483811148e-21
AT1G48020	51119.7562116187	-1.5277573971789	0.15396047580629	-9.92304933573402	3.30501677874283e-23	4.71816073263485e-21
AT3G02810	71157.1502789926	-1.5117264738479	0.152363375186051	-9.92184947335233	3.34499670192255e-23	4.71816073263485e-21
AT1G01310	49696.939420664	-1.5123841501573	0.153061960136489	-9.88086229137972	5.03973500329984e-23	7.0186284185196e-21
AT1G15410	2991.30600133555	2.25703943245454	0.229077019502902	9.85275361689415	6.6691304262624e-23	9.17172161871737e-21
AT5G25340	17733.7605064149	-1.50461798262625	0.152967557470918	-9.83619015366904	7.86323019120414e-23	1.06804022918059e-20
AT2G03410	5507.70015457784	-1.59598135089014	0.16373706343417	-9.74722104706491	1.89586950037202e-22	2.54370198086499e-20
AT2G02970	23893.1919976799	-1.89236343791607	0.194399919387638	-9.73438386125386	2.15117353274555e-22	2.85147122979115e-20
AT5G48780	451.975338217165	-2.33745211458592	0.241593317640435	-9.67515218307804	3.84519138141538e-22	5.03628518789667e-20
AT3G09820	1733.03177508872	1.90278316229754	0.197813056596848	9.61909792524716	6.64110021906552e-22	8.59592760119516e-20
AT2G21480	11145.3855085987	-1.6502428332747	0.171674849756305	-9.61260682981371	7.07350584379578e-22	9.04915247598153e-20
AT2G14910	549.854338524685	-2.1320779537463	0.222002253398119	-9.60385726320905	7.70073665889474e-22	9.73833387599539e-20
AT1G15415	10048.0529888559	2.29561720877538	0.239802742338497	9.57293976869943	1.03908240678978e-21	1.29908916357968e-19
AT1G68700	364.783770977183	-2.23722705188963	0.235487367211705	-9.50041218082984	2.0906113961745e-21	2.58437152592269e-19
AT1G51200	5330.63562797331	-2.36145662772408	0.24897411303956	-9.48474762654888	2.42970301722951e-21	2.97017695506212e-19
AT3G19970	10739.8048564364	-1.46064497708029	0.154104474649233	-9.47827751533469	2.58514983103141e-21	3.12547455395687e-19
AT3G52800	17628.023468331	-1.43112311284142	0.151160168922104	-9.46759402987242	2.86363383606283e-21	3.42453255047426e-19
AT1G49270	31241.7197597447	-1.82750474296114	0.193690868150797	-9.43516212410357	3.90390054891861e-21	4.61835632679597e-19
AT1G15020	1034.16799551712	-2.37119904165545	0.253480236534367	-9.35457167815116	8.39391207754069e-21	9.82444900820242e-19
AT3TE32115	3541.34349384658	-1.49994386559015	0.160519543775984	-9.34430680717249	9.24933445072919e-21	1.07117029080971e-18
AT3G21700	46079.159122933	-1.56039682399308	0.167124600496068	-9.3367273241727	9.93577354355421e-21	1.13868104714774e-18
AT1G04470	64624.8642379076	-1.73752836736838	0.186911836239846	-9.29597826613175	1.45858639857953e-20	1.65436778939917e-18
AT5G47435	2307.14671434266	-1.52850840130252	0.164786707566953	-9.27567777687095	1.76493309654095e-20	1.98140754368812e-18
AT2G25530	466.396307019739	-2.09172183844946	0.226512129414088	-9.23448048393723	2.59542420638888e-20	2.88432900188792e-18
AT4G27000	435.672152747585	-2.49497117991446	0.270489501398364	-9.22391134227418	2.86455897886836e-20	3.15158778855097e-18
AT3G06455	616.333500381716	-1.82147718374191	0.198397958878002	-9.18092703192558	4.27395966354026e-20	4.65565388299702e-18
AT3G15260	378.095114361339	-2.28551951200039	0.249094791963724	-9.17530027016075	4.50317670102498e-20	4.85725000634087e-18
AT5G58110	882.281293298026	-1.9114754951141	0.208900487688265	-9.1501724877087	5.68427147501767e-20	6.07168492894606e-18
AT2G33450	1689.18857802769	-1.56427423053857	0.171768972274353	-9.10684979846112	8.48086864137924e-20	8.97178046081292e-18
AT3G01620	5996.71910291965	-1.53870298830726	0.169829047804056	-9.06030510211992	1.30086173299323e-19	1.36305531298966e-17
AT2G01450	40432.7638483075	-1.77381533911051	0.196521645912314	-9.02605578574266	1.77970844751488e-19	1.84720305090177e-17
AT3G51070	813.167638776059	1.94863312566311	0.2159588939065	9.02316681852789	1.82729013091135e-19	1.87886411404548e-17
AT1G08030	2490.7207899049	-1.47437670251269	0.1636152628681	-9.01124184056883	2.03736194566652e-19	2.07546815983547e-17
AT4G34710	9990.1549701186	-1.46339296792844	0.162448524137173	-9.00834880280441	2.09182129746187e-19	2.11139613896106e-17
AT5G44300	2456.58057728089	2.35020865032811	0.261025598762565	9.00374776063978	2.18140971862446e-19	2.1818063385733e-17
AT2G28180	27359.1603170441	-1.46537389712842	0.1632058376766	-8.97868555432513	2.74020688136901e-19	2.71601406385782e-17
AT1G05580	169881.735937253	-1.52780434654591	0.170468596063476	-8.96238006193829	3.17744510818516e-19	3.12127241787974e-17
AT5G42330	1402.65305389275	-1.68712713660545	0.188331163659884	-8.95830038862989	3.29721218572383e-19	3.19002303458912e-17
AT2G36320	19974.546525391	-1.35989100764265	0.151806993389215	-8.95802609143339	3.30542288623122e-19	3.19002303458912e-17
AT1G32430	396.208415849077	-2.22689203509691	0.248869938893107	-8.94801535694269	3.61930699603996e-19	3.46257526699406e-17
AT2G31830	8110.31458966213	-1.54854973147772	0.173124006198458	-8.94474293589626	3.72816462332911e-19	3.53597130912646e-17
AT1G45160	1273.32470616072	-1.7899572590434	0.202545714801394	-8.83730006728875	9.8059509341994e-19	9.22094634000528e-17
AT5G62240	48520.7113342098	-1.33661858938033	0.151442638591002	-8.82590663908136	1.08576577458961e-18	1.01233856373177e-16
AT3G13060	251.998291357843	-2.97022118641509	0.338465777288214	-8.77554360211092	1.70080273366515e-18	1.57245644334319e-16
AT4G00090	208.728288621121	-2.48334801633498	0.283483488231113	-8.76011520752281	1.95050920573993e-18	1.78829185679589e-16
AT4G35940	2358.43168469044	-1.56107322059834	0.17923174492792	-8.70980317256932	3.04402898546105e-18	2.76780222297871e-16
AT3G57330	912.802604026359	-1.70867548436733	0.196434298531535	-8.69845794314291	3.36424448271981e-18	3.03388670482651e-16
AT1G55560	478507.709557576	-1.42420926612703	0.164096662123559	-8.67908736044036	3.98957175764092e-18	3.5685584128102e-16
AT5G52990	3942.79484259674	-1.36045924014959	0.159096459645557	-8.55115973781247	1.21857840157367e-17	1.08119351404142e-15
AT3TE89570	13390.4079725577	1.82922682896026	0.21441341570919	8.53130772116076	1.44702563139399e-17	1.27361407972773e-15
AT4G16500	274.259696998873	3.28884608573082	0.387747224195291	8.4819332815504	2.21482565933638e-17	1.93392951619197e-15
AT5G23380	190.628309137258	-3.34521769195449	0.396137713114686	-8.44458273273772	3.05133400595985e-17	2.64336824673782e-15
AT3G62290	2172.73617941863	1.56714570013452	0.186020003606763	8.42460848160925	3.61958512790402e-17	3.11114652946875e-15
AT2G40850	87115.4055048054	-1.37992053384572	0.164286072667644	-8.39949796984523	4.48391470314842e-17	3.82418833829759e-15
AT5G54010	750.621231524043	-1.97930415125897	0.235702950358302	-8.39745174275562	4.56271959360832e-17	3.86146468991375e-15
AT2G04115	351.59682191657	2.65298323307513	0.316649002213656	8.37830915154773	5.36934590387038e-17	4.50943081178488e-15
AT2G26490	13220.362263434	-1.41581009405855	0.169470872381619	-8.35429755073425	6.5823233461711e-17	5.4862667768617e-15
AT2G21520	2326.51500954036	-1.8148301634108	0.217646801958071	-8.33841869985493	7.52905678122063e-17	6.22817163210446e-15
AT3G55770	306.627007869651	-2.88344491774129	0.346368996206817	-8.32477776394164	8.44870968289915e-17	6.93676895009376e-15
AT2G36630	897.09790870215	-1.60472032532913	0.192975732445056	-8.31565868410953	9.12440676228935e-17	7.43605357027462e-15
AT2G17370	1924.5736568448	-1.43655817521152	0.172777533822088	-8.31449635512667	9.2142734856761e-17	7.45407624186827e-15
AT3G30380	1353.60614403032	-2.16886624388239	0.26101267247756	-8.3094288997361	9.61637537633072e-17	7.72258115988252e-15
AT1G14360	195.02343700982	2.53957651713834	0.306955412327831	8.2734378191255	1.30150691821919e-16	1.03762167494547e-14
AT1G68110	70068.7037823282	-1.35138756089439	0.164172044852852	-8.23153273205342	1.84833001797764e-16	1.46297315523669e-14
AT1G69360	464.674672999173	-1.78438710220126	0.217764821172476	-8.19410174974028	2.52471428949721e-16	1.98406475807488e-14
AT4G04940	806.83272602088	-1.68404229536652	0.205541251355771	-8.19320834264853	2.54353330637413e-16	1.98467754870413e-14
AT1G64230	10625.9104826118	-1.29574746913136	0.158301233332024	-8.18532769364873	2.71563680066155e-16	2.10404479442806e-14
AT3G52600	38528.2421996259	-1.76863656198908	0.216205703534794	-8.1803418368399	2.83039775666772e-16	2.17762490341666e-14
AT3G29060	3705.64875401082	-1.6169800075356	0.199261345796286	-8.1148704535435	4.8630331388772e-16	3.71549240235604e-14
AT5G39400	50901.0740489216	-1.24567747127354	0.156010922974378	-7.98455292440081	1.41032504720224e-15	1.07009628753925e-13
AT4G06598	605.501813771899	-1.65390549587135	0.207355248981736	-7.97619305030001	1.5091583316313e-15	1.1372438331923e-13
AT5TE62780	844.221778108825	-1.70067945048234	0.213313091789955	-7.97269139091079	1.55255530161664e-15	1.16198730805348e-13
AT5TE08550	5932.5317843315	-1.63273602850236	0.204860112379507	-7.97000455353501	1.58668522140508e-15	1.17950748688505e-13
AT3G36659	32205.8484341707	-1.51967153090488	0.190792206900888	-7.96506081453482	1.65142540354192e-15	1.2193947845482e-13
AT3G09530	45062.4176139789	-1.32208344279708	0.16670577315562	-7.93063981991139	2.18019690161252e-15	1.59910175410273e-13
AT3G54680	909.44442266129	-1.50132107387202	0.189460757228232	-7.92417963400973	2.29657428157143e-15	1.67330531429463e-13
AT2G33420	60685.7578900293	-1.29885302258807	0.164310400154306	-7.9048740759459	2.68204584872513e-15	1.9413071333996e-13
AT5G13100	3519.91825999409	-1.29585824107847	0.164540252804729	-7.87563054626126	3.39028674815156e-15	2.43790423550088e-13
AT3G62600	710.635963445236	1.54575864088894	0.196562850442267	7.86394090954103	3.72233189606152e-15	2.65929191691356e-13
AT2G34440	529.865210809719	-1.67173650299569	0.212824477650547	-7.85500108563943	3.99768687919098e-15	2.83758393837801e-13
AT4G18395	2220.81296896159	2.01850187553557	0.257148633861224	7.84955317563496	4.17522121580436e-15	2.94460152668459e-13
AT5TE54680	91.8251180399166	-3.90782276414807	0.498169452499719	-7.84436449192009	4.35151495351395e-15	3.04938646615035e-13
AT1G56280	3876.84426173481	-1.30923962720174	0.167318554072985	-7.82483230539179	5.08334061824916e-15	3.53967806847957e-13
AT2G42780	3527.83419899104	-1.24316946027723	0.158959113588651	-7.82068691886555	5.25358589528986e-15	3.63521710817478e-13
AT5G07420	38097.2244593455	1.85761287156715	0.23869469010003	7.78238037381006	7.11724931207624e-15	4.89399855821642e-13
AT4G17730	369.081944138765	-1.8453281230822	0.237234630147828	-7.77849389834998	7.33930411078422e-15	5.01534309483528e-13
AT3G58830	548.785564877713	-1.67315239268072	0.215151941199745	-7.77660839753883	7.44947540701376e-15	5.05920545851638e-13
AT1G22110	1237.43732774791	-1.55823184762381	0.200477461709718	-7.77260363501639	7.68890507103979e-15	5.18400556801863e-13
AT3G15470	792.261425402766	-1.51009078690252	0.194299616312863	-7.77196998923024	7.72747603303995e-15	5.18400556801863e-13
AT5G44790	13807.82957035	-1.21754067100878	0.157099013876207	-7.75014839983777	9.17852195854341e-15	6.12012718714513e-13
AT2G16015	557.81758750607	-1.82266226487094	0.235528935953819	-7.73859168296977	1.00524048332933e-14	6.66244325155983e-13
AT1G61563	390836.576658984	-1.29352669156581	0.167187195035886	-7.73699619332788	1.01793105530621e-14	6.70615417393948e-13
AT1G80280	9505.99634502345	-1.25861842055501	0.163023574332812	-7.72046880769246	1.15902614081981e-14	7.59024142934498e-13
AT1G01780	47748.1762071771	-1.36021674626361	0.176637600609501	-7.70060701441868	1.35421372101653e-14	8.81601145480701e-13
AT2G24940	114.512059032599	3.57604686093795	0.467646354653192	7.64690417311166	2.05875629676294e-14	1.32458694602256e-12
AT2G24945	114.512059032599	3.57604686093795	0.467646354653192	7.64690417311166	2.05875629676294e-14	1.32458694602256e-12
AT2G24370	16474.1972928505	-1.17331207764117	0.153789932062008	-7.62931657430015	2.36001454483194e-14	1.50958604780471e-12
AT2G42790	2779.42683463311	-1.23545928377905	0.162013430458911	-7.62565967697585	2.42789575838325e-14	1.54402942969552e-12
AT5TE90660	33954.394292167	1.5854156623057	0.208102027048023	7.61845372097137	2.5673249970069e-14	1.62331664465919e-12
AT2G28370	433.390006057477	-1.6841890396268	0.221507729617558	-7.60329692573085	2.88680099364936e-14	1.81489054469316e-12
AT4G32130	376.024177142831	-1.89186548193143	0.249624383891725	-7.57884887860965	3.48634306317058e-14	2.1793605898297e-12
AT3G09770	5004.41839770028	-1.25837593726132	0.166324664112758	-7.56578072154241	3.85541944109732e-14	2.39645902208772e-12
AT1TE51690	104.016764939391	3.64871102390559	0.484300801170379	7.53397684886743	4.92178567833542e-14	3.04210595691272e-12
AT3G60080	537.425851593945	-1.60510098648643	0.213842132712814	-7.50600906436926	6.09571988030807e-14	3.74665419682399e-12
AT3G61160	171981.243584134	-1.16895337982594	0.155956880492308	-7.49536266778297	6.61152971985784e-14	4.04111388765978e-12
AT5G01800	21552.6588700682	-1.15820620363618	0.154602394400489	-7.49151530367574	6.80829436389398e-14	4.13838975643987e-12
AT4G16745	39782.8891648087	-1.2189794918593	0.163013466315906	-7.47778401016899	7.55862903644091e-14	4.5692327834573e-12
AT5G10090	5796.9633128027	-1.20038128921489	0.161363543453022	-7.43898692063834	1.01460367980917e-13	6.09981950014236e-12
AT2G45980	329.618955648152	-1.95947838791727	0.263820733910332	-7.42731004828173	1.10828370788372e-13	6.62681377942213e-12
AT3TE63935	529.008104711816	1.80242368512287	0.244032655108568	7.38599383070672	1.51318810084371e-13	8.99897053269325e-12
AT5G62750	38775.780781237	1.51637887859328	0.205908085220966	7.36434840315283	1.78014218642446e-13	1.05296367392698e-11
AT3G23920	3149.38959342656	-1.19402469416308	0.16291223026436	-7.32925141486018	2.31441844587465e-13	1.36167014660497e-11
AT1G27752	157.984139549882	-2.25819037531005	0.308367171626012	-7.32305700182894	2.42384779046889e-13	1.41846666972014e-11
AT4G02570	11721.5868452762	-1.21440057872942	0.165956784345779	-7.31757115876118	2.52499252084502e-13	1.46983956160513e-11
AT5G42490	29029.644262711	-1.13040928551126	0.154536115193261	-7.31485506865231	2.57659332339318e-13	1.49198314441957e-11
AT5TE13805	217.186346698498	-2.49346064640091	0.342681223963765	-7.27632701190705	3.43031490186179e-13	1.97593322252793e-11
AT4G26260	143479.609738936	-1.12551964942136	0.154797985179506	-7.27089340417571	3.57117670627002e-13	2.04635865220744e-11
AT3G52620	3263.99840968734	1.63773183587452	0.225794930061663	7.25318250249139	4.07090957707927e-13	2.32062938689255e-11
AT3TE80270	416.621284178641	-1.94776903910761	0.268589375699369	-7.25184692818133	4.11126376734665e-13	2.3315527818736e-11
AT1G53190	16378.3366536265	-1.16425832203115	0.161100376012784	-7.22691250539822	4.94098199618712e-13	2.78772738061798e-11
AT5G65530	35252.3724414031	-1.17155054171502	0.162291534074214	-7.21880256045448	5.24473372603572e-13	2.94400818642066e-11
AT2G23120	156.817166720123	2.92467761257827	0.405761965578643	7.20786535132115	5.68357881503407e-13	3.17414894025405e-11
AT3G06270	12654.3110660056	-1.38835654211667	0.193688639851559	-7.16798126715481	7.61117139812689e-13	4.22919735970667e-11
AT3G25910	515.711456865485	-1.50888931330834	0.210592406833366	-7.16497492002298	7.78007961162102e-13	4.3013284365354e-11
AT3G21180	44683.0355162835	-1.15119108473318	0.161034570475764	-7.14872018680261	8.75906660390628e-13	4.81836253880884e-11
AT1TE22695	102.147103763737	-2.79489752560277	0.391122720288948	-7.14583270319349	8.94519511665419e-13	4.89627048126514e-11
AT1TE60385	315.387895799632	-1.88781192951196	0.264979582378539	-7.12436751755126	1.04559706228903e-12	5.69488063331879e-11
AT1G09970	263.964803048472	-1.89418767553029	0.26606144372671	-7.11936178725672	1.08427954775522e-12	5.87647467211966e-11
AT5G26667	6417.1415124626	1.53393065251632	0.21617110622178	7.09590971395864	1.28503353117824e-12	6.93036221079561e-11
AT2G30530	898.776005417165	-1.42541168795171	0.201423883122716	-7.07667663761244	1.47652518574461e-12	7.92425858222546e-11
AT2G46860	23795.8064670293	1.72960979415558	0.246111460740173	7.02774990223466	2.09890670161054e-12	1.12097920053976e-10
AT5G61410	6297.43915106084	-1.13617365727591	0.161735210412679	-7.0248998617981	2.14219830253999e-12	1.13857322340797e-10
AT2G36900	1222.64572535816	-1.33502596843157	0.190222156241425	-7.01824642728363	2.24670041994405e-12	1.18837490481848e-10
AT4G24520	370.285905658792	-1.79760336925827	0.256581535269483	-7.00597323720227	2.4527480046077e-12	1.29115471515282e-10
AT4G33465	873.252956741534	1.84389498266749	0.26400996750707	6.98418699899318	2.86510235188314e-12	1.50070890768832e-10
AT4G33010	930.452216950221	1.44671072107361	0.207159756372697	6.98355098695358	2.87810924852059e-12	1.50070890768832e-10
AT5G22940	2682.38848609971	-1.29513018327657	0.185555659094638	-6.97973960802792	2.95727661522913e-12	1.53471496795995e-10
AT2G47650	788.198064842726	1.42111622116646	0.203772652584931	6.9740281786544	3.07992351016479e-12	1.59086002154145e-10
AT3G62710	288852.301211594	-1.07712731856824	0.154545721128627	-6.96963533316956	3.17763568987481e-12	1.6336611149534e-10
AT2G11851	385.493442886692	-1.64549892341576	0.236404175384821	-6.96053240488327	3.38989173383828e-12	1.73467855142738e-10
AT2G16592	209.770067306601	2.51755495277249	0.36225365310223	6.94970204223729	3.66058519270755e-12	1.86452584676706e-10
AT3G08580	6674.37177443219	1.73225291787269	0.250730254765275	6.90883084490287	4.88664212358142e-12	2.46847888761047e-10
AT5G18140	2818.95865107662	-1.1853251994931	0.171570256383056	-6.90868699785986	4.89159887287441e-12	2.46847888761047e-10
AT1TE58740	194.40479244477	2.305348833606	0.333719209216219	6.90804955165869	4.91362367193868e-12	2.46847888761047e-10
AT1G08150	22814.5914251417	-1.38023644994532	0.199981694681331	-6.90181394924524	5.13426519988988e-12	2.56759935132675e-10
AT1G76965	4489.48891994145	1.22997497479616	0.178424656836863	6.89352579739441	5.44262437057171e-12	2.70949110068009e-10
AT5G14800	140.465604465599	-2.31319055638001	0.336188387722999	-6.88063788296563	5.95851405549477e-12	2.95295367741232e-10
AT5G05110	348.988549965433	1.74977971635009	0.254382184272216	6.87854662997015	6.04662588552452e-12	2.98318286962066e-10
AT5G17300	436.664190232417	-1.98614320397953	0.288817098846988	-6.87682000791707	6.12033588929227e-12	3.00606854705328e-10
AT3G28980	114395.200736775	2.88739594799137	0.421302851714417	6.85349253213365	7.20684158784371e-12	3.52398538442029e-10
AT4G14811	882.562958598385	-1.37076760504151	0.200066083020448	-6.85157416163042	7.30417149423929e-12	3.55577410529295e-10
AT4G31480	470.556066306781	-1.4563794181064	0.213329299333817	-6.82690761491444	8.67645292450793e-12	4.2052129989179e-10
AT4G31340	4262.38726233837	1.20230551271387	0.176174039999113	6.82453278996111	8.82119249565991e-12	4.25661227356361e-10
AT5G45840	26339.6938080935	-1.10409350807925	0.161835954280883	-6.82230047695694	8.95940193562086e-12	4.30442533168999e-10
AT1G25240	47515.4237316503	-1.03044898594773	0.151251035255172	-6.81283922592185	9.56910658883197e-12	4.57736133436214e-10
AT2G03470	4589.84961493409	-1.23421466076147	0.18122570763625	-6.81037297003545	9.73460367969088e-12	4.63636838458697e-10
AT4G18790	1930.79305067991	-1.22311249562327	0.17998390641941	-6.79567701332747	1.07805058207772e-11	5.11237607931859e-10
AT1G50390	93.6471340720183	-3.0852610663443	0.455903668384577	-6.76735301840505	1.31159782257183e-11	6.19321855962885e-10
AT3G02480	13841.4194656172	4.78760567023631	0.708188350175305	6.76035643491055	1.37652670271933e-11	6.47202853987952e-10
AT3G07850	428564.874174265	1.5241386262477	0.225701966013954	6.75288147978946	1.44937337633993e-11	6.78553441978378e-10
AT1G15470	3280.70122916294	1.13407901360955	0.168068583243948	6.74771567487692	1.50190890682297e-11	7.00169567494334e-10
AT5G17590	1522.88384211238	1.39330443742215	0.206710233415407	6.74037474778595	1.57978638371447e-11	7.33367501840783e-10
AT1G01770	7049.37705853711	-1.20104992761748	0.178269099968522	-6.73728609068851	1.61372254037237e-11	7.45973755847763e-10
AT5G47530	1255.70083033249	-1.28075078533252	0.190249698656779	-6.73194645970537	1.67408248533405e-11	7.70638305591848e-10
AT5G50380	1116.65236556053	-1.25134963805951	0.18617268300482	-6.72144601379089	1.79929902275948e-11	8.24828660349991e-10
AT2G41860	17040.8871917232	-1.13461509043218	0.169077533749028	-6.71062006449868	1.93799108761502e-11	8.84721076595039e-10
AT2G20110	428.514517217862	-1.55541674630297	0.23183418919467	-6.70917758811189	1.95724354496131e-11	8.89817912465466e-10
AT4G14810	1651.26339835389	-1.21650030480214	0.18167236017238	-6.69612209390501	2.14022928288503e-11	9.69004221000045e-10
AT5G07410	656156.718552567	1.61252052915212	0.240878710683606	6.69432564038489	2.16668450845006e-11	9.7696159680195e-10
AT5TE40920	589.371685100627	1.52614213781695	0.228050054287087	6.69213670037425	2.19935260881399e-11	9.87643975598839e-10
AT5G21090	123.84688049323	2.5746496694259	0.385711309089861	6.67506917414773	2.47115577588682e-11	1.10214296551072e-09
AT2G22490	117.791045220001	-2.65643970679292	0.397975708719452	-6.67487901545657	2.47436204763813e-11	1.10214296551072e-09
AT3G27530	431.000828218093	-1.54391581415533	0.231493668172856	-6.66936519837117	2.56912231775832e-11	1.13973724757972e-09
AT1G48590	2391.4015789508	1.37243137147335	0.206482465131023	6.64672116638318	2.99693995179325e-11	1.32419009436262e-09
AT2G28390	150.943842048904	-2.07134567727039	0.313039843579434	-6.61687551841875	3.66870169605108e-11	1.61452224239816e-09
AT4G19200	9135.48540053791	1.59131875223778	0.241909089901431	6.57816848836141	4.76278358656582e-11	2.08765518005566e-09
AT1G69510	3688.23290495027	-1.18672202878691	0.180662347196571	-6.56872916355776	5.07464880131408e-11	2.21552722666895e-09
AT1G61566	334142.52809859	-1.08033582200854	0.164616517238011	-6.56274254937938	5.28270118432153e-11	2.29724420671563e-09
AT5G23050	498.191153739511	-1.60352579666594	0.244725185089575	-6.55235298352727	5.66374685304727e-11	2.45324971957583e-09
AT2G13350	54521.1460828322	-1.10097828371498	0.168322698113831	-6.54087830133535	6.1158585085298e-11	2.6386931494449e-09
AT1G48450	819.961506407164	-1.35147764527313	0.206755433448469	-6.5366003820643	6.2932904593553e-11	2.70463990757137e-09
AT4G26180	227.620035691702	-1.82948788951552	0.280279526385782	-6.52736899161652	6.69350082450767e-11	2.86544342689624e-09
AT5G43530	634.194152021015	1.42728684007536	0.218843068939809	6.52196501808301	6.93922017022894e-11	2.95912016716507e-09
AT1G03055	738.233574765399	-1.52395596937147	0.233692362837548	-6.52120570337529	6.97444562282829e-11	2.96265832982073e-09
AT2G07040	108719.452216517	-1.30830945483868	0.20072339875334	-6.51797181078228	7.12643802353148e-11	3.01138679518008e-09
AT2G46360	11606.3616531794	-1.07621123615201	0.16512373847005	-6.51760459231132	7.14390068662063e-11	3.01138679518008e-09
AT5G22000	19750.0860113496	-1.24165496838146	0.190607344948747	-6.51420315788634	7.30765385661868e-11	3.06865678360758e-09
AT5TE54685	54.1191343492024	-3.94938020749862	0.606351009903792	-6.5133563612358	7.34898795702199e-11	3.06933116685036e-09
AT3G10030	574.104280567788	-1.45683823728748	0.22368061952285	-6.51302844383732	7.36505569940461e-11	3.06933116685036e-09
AT1G20280	77.9546960819983	-2.9116378932159	0.448197071942563	-6.49633403582125	8.23008133567927e-11	3.41688131528843e-09
AT1G68140	477.771721661366	1.55076940798792	0.238893322147462	6.49147240302799	8.5001483288073e-11	3.51573804186233e-09
AT3G44400	1141.47792999221	-1.31139376693023	0.20276989024243	-6.46739890899157	9.97041969463934e-11	4.10841039252517e-09
AT3G28830	329732.554004761	1.47676757630239	0.228468662520212	6.46376426426426	1.02129934653483e-10	4.19266246663291e-09
AT3G50000	2819.95972497507	-2.78386464302877	0.430907435595075	-6.46047019166496	1.04378152984421e-10	4.26902765477544e-09
AT3G49720	214.351657292585	2.23379656387657	0.346645911730953	6.44402973836401	1.16342273167338e-10	4.74073218291502e-09
AT5G09790	671.573911046157	1.35464816670778	0.210395677285059	6.43857413891827	1.20601049477586e-10	4.89613559539633e-09
AT2G24450	256406.229624095	-1.47749106471987	0.229958533650842	-6.42503255375261	1.31841299515168e-10	5.33278668112455e-09
AT5G42980	1113.6217259937	1.41904123050054	0.221850221233188	6.39639312781653	1.59090090086197e-10	6.411388905232e-09
AT1G74800	373.237378409597	-1.43740011120444	0.225141832644851	-6.38442040876453	1.72047835706005e-10	6.90828572422432e-09
AT4G15417	103.925177658139	9.5106422682532	1.49349368308253	6.36804987927603	1.91446664427532e-10	7.65925891647893e-09
AT5G54680	3964.20958939429	-1.01989909124448	0.160407014384381	-6.35819508990118	2.04138107143097e-10	8.13741831445054e-09
AT3G07840	29093.2244159189	-1.09937958097868	0.173357883029017	-6.34167631589422	2.27278445558697e-10	9.02713883767791e-09
AT4G11760	4137.33199519021	4.1705453676183	0.658239299034182	6.33591062359484	2.35943538599677e-10	9.33759284774693e-09
AT1G63640	14064.4134709262	-0.99266566284754	0.156863603663278	-6.32820896412905	2.48023117212188e-10	9.78046715257525e-09
AT4G34980	252.22010722499	1.82097385176826	0.287993101518617	6.32297732885293	2.56570956610946e-10	1.00517308786365e-08
AT3G57550	6904.76168256366	-1.02628453444172	0.162312776825795	-6.32288199679559	2.56729356198587e-10	1.00517308786365e-08
AT5G27980	17396.570729134	1.33768991815166	0.211620332856055	6.32117859422117	2.59575808555685e-10	1.01271384600342e-08
AT3G19274	119.230754418309	-2.22151120842226	0.351531932585747	-6.31951467988013	2.62386023671948e-10	1.02006043549073e-08
AT5TE14840	25003.4453032455	-1.11393247673225	0.17654413351514	-6.30965444477213	2.79659166767177e-10	1.07958250974473e-08
AT5TE14845	25003.4453032455	-1.11393247673225	0.17654413351514	-6.30965444477213	2.79659166767177e-10	1.07958250974473e-08
AT5G05370	282.829346579857	2.0712924697136	0.328878736170119	6.2980431445169	3.01426623882935e-10	1.15954395662939e-08
AT3G11450	479.904901899693	-1.44969937050222	0.230604528441722	-6.28651735635184	3.24666734457172e-10	1.2445935235184e-08
AT5G39880	272570.824004842	-1.02726554191314	0.163457361094531	-6.28460862841812	3.2868064627385e-10	1.25560571885587e-08
AT3G04700	143765.919239384	-1.02614146156315	0.163378756003044	-6.28075207981162	3.36939078362075e-10	1.28270025610365e-08
AT3G04710	144032.742667488	-1.02442780265134	0.163287606313688	-6.27376336623696	3.52424001953584e-10	1.33702374810115e-08
AT3G17020	149.436242292166	2.14122370581874	0.342343886484965	6.25459892917579	3.98538767678228e-10	1.50677784261026e-08
AT1G29970	3683.50261106975	-1.0903085852413	0.175311463519995	-6.21926577617642	4.99486627621728e-10	1.88196982092269e-08
AT5G02840	619.872616835661	-1.31910305442028	0.21227405949123	-6.21415097813577	5.16028947080132e-10	1.93766227842171e-08
AT5G12950	53871.1159589547	-1.10047890930527	0.177506930888763	-6.19963910026078	5.65927809305579e-10	2.11780195849659e-08
AT3G25170	68147.5977574686	-1.09979685816583	0.177457718343046	-6.19751492600506	5.73616005318641e-10	2.13929603068328e-08
AT3G27090	1507.19885881616	-1.22866850215183	0.198589859636219	-6.18696495582667	6.13335930382418e-10	2.27970334664438e-08
AT1G12970	550.856241554023	-1.2976110925975	0.210053692947478	-6.17752096804105	6.51159298021649e-10	2.4106346396081e-08
AT1G10700	184.749854526928	-1.77740889540429	0.287742170197748	-6.17708865607979	6.52944121617172e-10	2.4106346396081e-08
AT3G05610	401243.043025901	-1.11057560475162	0.179819539080848	-6.1760563419768	6.57225415188025e-10	2.41832575849453e-08
AT1G74530	169.54646189584	2.12185992443875	0.34519943115972	6.1467654141556	7.90789483315582e-10	2.90008863181268e-08
AT4G38920	476.783122902916	1.33446747962259	0.217399365947916	6.13832277662806	8.33972805079119e-10	3.04829528288388e-08
AT5G12960	194273.936147852	-1.08233254627071	0.176504749606057	-6.13203071694324	8.67643455101953e-10	3.16086532881844e-08
AT5TE93370	968.724461128934	-1.20757224000276	0.197046387863269	-6.12836527021595	8.87865664175994e-10	3.22386073837105e-08
AT3G43860	203759.393793207	-2.50504414824393	0.409392962573629	-6.1189233261268	9.42097180121785e-10	3.40952407095391e-08
AT4TE13145	62.6967741630413	-3.53971525150014	0.578803423081306	-6.11557414891604	9.62099337865982e-10	3.47049734924641e-08
AT4TE30710	845.342189348101	4.24208878804461	0.694839383556246	6.10513578883978	1.02713319484334e-09	3.69298019923739e-08
AT3G07830	44211.7279192162	-1.00692001855281	0.165121846528179	-6.09804238339219	1.07375280599677e-09	3.84802227087182e-08
AT4G13940	233.069880533543	-2.17499938871828	0.356802991658111	-6.09579919330487	1.08892037480615e-09	3.88970842974586e-08
AT3G07680	340.496292297376	-1.51942875942716	0.249356298375279	-6.09340437489344	1.10534374079457e-09	3.93559606350223e-08
AT4G37430	2600.62025503697	-1.12855298547595	0.185407146500784	-6.08689042884964	1.15124699558268e-09	4.0858127243228e-08
AT1G65113	271.247530540771	1.88745944528111	0.310256732280134	6.08354065811828	1.17557088885267e-09	4.15872376821772e-08
AT5G64920	6247.44953701294	-1.18410036756724	0.194913856108261	-6.07499328785302	1.2399290749675e-09	4.37233964192066e-08
AT1G32928	226.769377019216	2.21919099087103	0.36591089100988	6.06483995255312	1.32085116237371e-09	4.64281293560242e-08
AT3G20530	48417.4080899556	-0.98352845121969	0.162217265878755	-6.06303185972079	1.33579191606103e-09	4.68037664347244e-08
AT2G07560	714.312679031798	-1.20405618240995	0.199279467648287	-6.04204836865088	1.52169829131379e-09	5.31483320667756e-08
AT1G08140	50576.1868218172	-2.70112580161519	0.447292544966996	-6.03883483417881	1.55231034359085e-09	5.40459443043878e-08
AT5G01200	87.7999178057482	-2.64552575981916	0.438727962949219	-6.02999120921173	1.63968598008167e-09	5.69079657818881e-08
AT3G16050	410.73876837988	-1.57134318398376	0.260680601784409	-6.02784853659081	1.66156652248765e-09	5.74860216365066e-08
AT4G03420	4817.43082220082	-1.06621873146925	0.176911385492199	-6.02685196604409	1.67183999483728e-09	5.76601367498426e-08
AT3G53305	2059.53313181461	-1.31588960425069	0.218504998013624	-6.02224029753608	1.72019247117621e-09	5.9142367399627e-08
AT5G55510	1246.03766552681	1.06536531458739	0.176934317606263	6.02124748325069	1.7307788116497e-09	5.932096101486e-08
AT5G01620	252.549230511304	1.60765663167347	0.267818875945595	6.00277566694009	1.93972538936307e-09	6.62759588005358e-08
AT2G29790	858.069962079728	1.68281148313014	0.280960754063014	5.98948948845974	2.10500735440057e-09	7.17005910622759e-08
AT2G34655	168.733075864655	1.98854616550726	0.332471901377645	5.98109541668763	2.21641985813817e-09	7.52625039482597e-08
AT5G26742	942.227279210995	1.24346763976841	0.208083542063271	5.97580965528889	2.28950201483419e-09	7.75049266683252e-08
AT3G61170	18827.2822055252	-0.918465706944951	0.153874619369947	-5.96892268982169	2.38825234145728e-09	8.05998535604692e-08
AT5G47030	1408.98181301479	1.34699670170285	0.226257035488005	5.95339145497758	2.62642071869763e-09	8.83666077893314e-08
AT4TE13140	53.7721696786229	-3.70494850389976	0.622470045029335	-5.95201091760994	2.64867700128831e-09	8.88437328297987e-08
AT1G50290	1187.22500861388	-1.27335235237339	0.214215448147204	-5.9442601520427	2.77708259960546e-09	9.28676679661375e-08
AT1G20225	296.059583392895	1.57655611860915	0.265805335404157	5.93124331463099	3.00649292245111e-09	1.00234651917597e-07
AT4G08180	2152.11384090165	-0.981143735683224	0.165558011338971	-5.92628364974972	3.09867165577545e-09	1.02995726757829e-07
AT5G17480	846.669157151211	3.72372784041517	0.628701516796989	5.92288668140367	3.16338837366338e-09	1.04830117129652e-07
AT5G24460	1123.42668735103	-1.16255156645005	0.196446164788184	-5.91791429322921	3.26049783803121e-09	1.07723715357416e-07
AT1G14670	556.758500503835	1.21274459843954	0.205276503799174	5.90785879530561	3.46582886923158e-09	1.14164818021814e-07
AT3TE12470	86.8152766874146	-2.73822404386888	0.463897041748807	-5.90265467860342	3.57698481455017e-09	1.17370903569498e-07
AT4G39110	142416.03298523	-0.967742873117481	0.163960056660235	-5.90230872585558	3.58449587341859e-09	1.17370903569498e-07
AT5TE19060	87.8197360312444	-2.38088109155461	0.4037935632455	-5.89628292342808	3.71781299506826e-09	1.21375010598638e-07
AT4G38540	339.797787560789	-1.8536757875555	0.314728318681142	-5.88976484646589	3.86745537634678e-09	1.25886816717655e-07
AT1G08830	97.4073282005108	2.52748792754887	0.429487250432094	5.88489629204601	3.98303667553051e-09	1.29266576708515e-07
AT4G39120	147973.678727455	-0.961628658505087	0.163779724488532	-5.87147561462908	4.31933136748529e-09	1.39768481485509e-07
AT2G33270	14219.1343078751	-1.01483527620639	0.173088818070895	-5.86308975655909	4.54332465581151e-09	1.46585506930317e-07
AT3G07820	862755.518494819	-0.98466401521207	0.168446978284228	-5.84554276509847	5.04919194956786e-09	1.62430438096917e-07
AT5G66050	1767.21973885769	-0.976023772568346	0.167068254784686	-5.84206600964512	5.15573677999289e-09	1.65374390826477e-07
AT5G26717	58347.3447802223	1.2742373316727	0.21838252423461	5.83488690836716	5.38270637420705e-09	1.72152719561122e-07
AT1G50640	3150.04316958961	-1.38080078148721	0.237094650263352	-5.82383777935731	5.75114022348502e-09	1.83403028228354e-07
AT2G44160	387.792456645814	1.40047758113306	0.240760502858824	5.8168909123531	5.9952238258411e-09	1.90634255872554e-07
AT3TE44910	124.978900336181	2.76910271926453	0.476958714935487	5.80574928720839	6.40787863841491e-09	2.03168532506746e-07
AT3G60860	233.173601802021	-2.21558190451805	0.38219900974373	-5.79693261372819	6.75388130452754e-09	2.1352356928854e-07
AT1G71697	8333.66104805711	-2.80978722130043	0.484946199469364	-5.79401843828232	6.87219087207511e-09	2.1664138674662e-07
AT4G23490	1314.0276446796	1.05908723577603	0.183118719508972	5.78360988224437	7.31143910608792e-09	2.29829865843369e-07
AT5TE52970	84.6507796050138	2.36403348178437	0.408865208695554	5.78193847631742	7.3844716245809e-09	2.31464264426322e-07
AT4G02650	52463.7097465066	-1.1127121715205	0.192756279324344	-5.77263773414189	7.80401060968232e-09	2.43919672521946e-07
AT1G07590	97.9872313347707	2.53048277817281	0.438638675971932	5.76894587000517	7.97689192735319e-09	2.48616897973767e-07
AT5G23340	515.607997225888	-1.18082080822418	0.205129382537296	-5.75646839871654	8.58918520190344e-09	2.66944111839948e-07
AT2G31500	95825.8697793263	-2.67030384266872	0.464575239626487	-5.7478393485103	9.03910591870262e-09	2.7992368829052e-07
AT2G22807	130.994341291332	2.54858443919379	0.443425506075747	5.74749175289532	9.05770160256544e-09	2.7992368829052e-07
AT5G17290	757.411578763314	-1.19137621379301	0.207443152831788	-5.74314551977077	9.29337951201524e-09	2.86402692972526e-07
AT1G18990	30058.5157083906	-0.900287435697915	0.157333641807211	-5.72215468577969	1.0518147423381e-08	3.23242061318541e-07
AT3G20300	31469.5880739469	-0.88989488006495	0.155604029209131	-5.71897067568177	1.07171286800314e-08	3.28439692862689e-07
AT4G18400	183.195852366311	1.7625361439866	0.308251431105954	5.71785226645314	1.07878868923066e-08	3.29689809969881e-07
AT4G28650	1343.57427112478	-1.04325405084678	0.182591006259573	-5.7136113777898	1.10603425626506e-08	3.370800245825e-07
AT5G54310	12717.8406671063	-2.76155979012017	0.483429296925416	-5.71243780152244	1.11369126920051e-08	3.38476003970828e-07
AT2G19045	336.090191269027	1.98883981892921	0.348909264890071	5.70016339220979	1.19692650900478e-08	3.62770949092854e-07
AT5G27660	211.595828035203	1.53581133234679	0.269483163836563	5.69909938150435	1.20442001932928e-08	3.64039259688482e-07
AT5G49920	132310.324977077	-1.01715246497323	0.178616645573339	-5.69461184151283	1.23652908854032e-08	3.72720357044401e-07
AT1G66240	86.5068707290811	2.62897532072113	0.462314712383757	5.68654911968036	1.29632112526628e-08	3.89675546999443e-07
AT5G06560	3472.34099008375	-1.01169135063143	0.178457961076673	-5.66907379490209	1.4357152339268e-08	4.30401607729228e-07
AT5G56360	44.3636239052148	-3.37274370360438	0.595257878063137	-5.66602111101609	1.46151526188831e-08	4.3694540519824e-07
AT3G62660	20159.5793775271	-0.993068605842304	0.175609077381617	-5.65499586154228	1.55850027788603e-08	4.64678050333389e-07
AT1G72340	3953.15795391598	-1.01843698765171	0.180170155066997	-5.65263979082996	1.58002202304363e-08	4.69821683716919e-07
AT2G43160	8624.22304971567	-0.965785837417316	0.170946629512923	-5.64963369075554	1.60790095816299e-08	4.76822812444991e-07
AT5G65480	363.228523285715	-1.38044188344965	0.244866749617065	-5.63752279804608	1.72513771943845e-08	5.1021411799091e-07
AT4TE26620	1496.11306341672	-1.0212431299337	0.181669878857118	-5.62142241938138	1.89391546271929e-08	5.58628898681974e-07
AT4G33860	41000.0483898636	-0.843555938081703	0.150164200352454	-5.61755688840466	1.93676417092459e-08	5.69740091136692e-07
AT4G17940	2285.8554606064	1.11253172906013	0.198418904414372	5.60698453780771	2.05882045734906e-08	6.04030471246783e-07
AT4G20150	101.0268537841	2.24166032190427	0.400306640828611	5.59985794206204	2.14527533118194e-08	6.2772125515063e-07
AT5G13490	527.99210168546	1.60184775134926	0.286668729015404	5.58780079310004	2.29963218063326e-08	6.71102208258014e-07
AT4G14368	1509.87974532775	-1.01910652830414	0.182515725823081	-5.58366422240236	2.35503188235825e-08	6.85451343113902e-07
AT1G10760	223.982685285133	-1.49002410761223	0.267126275100149	-5.57797658449587	2.43332399513771e-08	7.0637020038272e-07
AT1G76370	27042.1980443547	-1.00194674192916	0.179687159113607	-5.5760620117305	2.46024256457205e-08	7.12304965668993e-07
AT1G17720	733.153967255666	-1.09222268472762	0.19605458652205	-5.57101317599007	2.53262171916719e-08	7.31336067041403e-07
AT2G23660	1502.54067419625	-0.996573417720125	0.178904420498494	-5.57042366501233	2.54120637177811e-08	7.31894044562899e-07
AT1G76490	9608.26143286033	-2.65914662918531	0.478444863579987	-5.55789565654047	2.73046524142467e-08	7.84349310343451e-07
AT2G30505	5723.90185439898	-0.906020530924887	0.163062721396251	-5.55627014664626	2.7560022582841e-08	7.89623355355252e-07
AT5G36880	545.186087696777	-1.15561403348442	0.208422456712992	-5.54457543447804	2.94668279683585e-08	8.42062444955534e-07
AT4G27790	42161.5207037269	-0.834298682568363	0.150512750798564	-5.54304321821166	2.97259454865121e-08	8.47266456587062e-07
AT4G10010	14125.4091367941	-0.924446396931729	0.166909259526606	-5.53861660853133	3.04870225744085e-08	8.6671375287763e-07
AT5G20390	113349.083952237	-2.67783678763497	0.484422642075172	-5.52789352736206	3.24098636304766e-08	9.19003401192021e-07
AT1G20970	2803.98623317686	-0.898865878068499	0.162793674835537	-5.52150370078309	3.36110733754386e-08	9.50614471148009e-07
AT1G10680	620.087079052966	-1.15154758535154	0.208688191097319	-5.51802945483643	3.42821982551654e-08	9.62787286052442e-07
AT5G53360	2938.61721651966	-2.71451354901835	0.491938857722753	-5.51798969811852	3.4289952831741e-08	9.62787286052442e-07
AT2G44610	668.01264374365	1.20581613395595	0.218527386568769	5.51791769850543	3.4304000739189e-08	9.62787286052442e-07
AT4TE21295	30.3073868876422	5.21675689380303	0.949388119907362	5.49486220062671	3.91015615163978e-08	1.09464473232419e-06
AT3G23810	178.499725819026	-1.5864327944894	0.288968603387271	-5.4899832573274	4.01971844342124e-08	1.12246046483555e-06
AT2G39930	632.25395234618	-1.53767103913522	0.28028158019033	-5.48616515609422	4.10752894214465e-08	1.14407679548039e-06
AT2TE06365	61.7678246788425	2.66997867004186	0.487820038360567	5.47328617129986	4.41765852445398e-08	1.22735048197077e-06
AT1G54280	5482.00238899652	-0.965084228141159	0.176416831747697	-5.47047704337745	4.4882584318031e-08	1.24382416288911e-06
AT3G10860	120.376132048283	2.35452273947295	0.430490950830997	5.46938962347038	4.51588045268808e-08	1.2483345914692e-06
AT2TE34310	1267.52232703435	1.53374801224562	0.280824948431507	5.46158032187691	4.71914641809384e-08	1.30125435819219e-06
AT1G05840	213.720719909289	-1.57510342841333	0.289427308714033	-5.44213825368359	5.26447911049539e-08	1.44799497934176e-06
AT2G37760	161.704884838077	2.07644591647155	0.381729977751135	5.4395673316107	5.34101213424829e-08	1.46199472910142e-06
AT1G54620	69.4339126528845	3.24896791550649	0.597287707021718	5.43953588415031	5.34195492727476e-08	1.46199472910142e-06
AT5G67490	765.238576264592	-1.4060714586601	0.259955838984555	-5.40888584827534	6.3418033389868e-08	1.73132804802811e-06
AT2G24440	2941.82491559367	-1.08150151670832	0.200155139594981	-5.40331624207488	6.5419971534508e-08	1.78156070995707e-06
AT1G48598	1014.87791551046	-1.03976443623125	0.1932567116598	-5.3802241966199	7.43931321237265e-08	2.01594393996364e-06
AT1G48600	1014.87791551046	-1.03976443623125	0.1932567116598	-5.3802241966199	7.43931321237265e-08	2.01594393996364e-06
AT2TE48720	289.119306567531	-1.36419496701602	0.253907076553829	-5.37281191816963	7.75181742222311e-08	2.09546671447908e-06
AT2G40116	23110.6335609129	-0.911828441587393	0.169831589895613	-5.36901551794837	7.91676081452654e-08	2.13480888434855e-06
AT4TE13150	1749.19073461775	-2.60577095494008	0.485509500141291	-5.36708541064955	8.00191694595709e-08	2.15249609387335e-06
AT3G06483	4105.28611127533	0.985551454759807	0.184130906053813	5.3524499275085	8.67713186368771e-08	2.32843426254371e-06
AT2G19030	1211.96770894278	1.50820594930626	0.281839775757319	5.35128849451299	8.73301672369109e-08	2.3377287103175e-06
AT1TE82675	993.890287437008	1.22925297724154	0.229801511884773	5.34919447291499	8.83465690051377e-08	2.35919648590904e-06
AT3G43300	491.337449270386	-1.16365321944491	0.217621473636168	-5.34714336780188	8.93532385189768e-08	2.38030104161206e-06
AT2G03420	183.732582473167	-1.55721413924388	0.291285399864448	-5.3460082103962	8.99151312467696e-08	2.38948375356753e-06
AT5G26710	8730.70166592029	-2.51991572450419	0.472172924985496	-5.33684925831271	9.45756032881603e-08	2.50727900572612e-06
AT1G64628	13403.0900224089	0.84575057060341	0.158618951462401	5.33196419977525	9.71560955975145e-08	2.56333660375025e-06
AT1G64630	13403.0900224089	0.84575057060341	0.158618951462401	5.33196419977525	9.71560955975145e-08	2.56333660375025e-06
AT3G51030	1017.00436445637	1.18976379789139	0.223627670146772	5.32028884042175	1.03602634415842e-07	2.72688082259112e-06
AT5G51400	339.612740332215	1.42857905810862	0.268567705885191	5.31925107451048	1.04195264114335e-07	2.73593388015732e-06
AT3G14595	41903.1278416547	-0.903786239398166	0.170583259145398	-5.29821181706826	1.16942262289036e-07	3.06333040405708e-06
AT1G33290	848.147927473044	-1.05002058458731	0.198220097128106	-5.29724583834048	1.17562372179325e-07	3.07225942688108e-06
AT3G25900	7766.81814280595	-0.878865604482514	0.16618593573931	-5.28844754866114	1.23358850940272e-07	3.21609971100681e-06
AT5TE39025	202.51539965957	-1.56233120596288	0.295536724937445	-5.28641983934001	1.24733437541071e-07	3.24424888847959e-06
AT1G64740	93925.7320130376	-0.954377237399414	0.180581506252178	-5.2850220225024	1.2568963593394e-07	3.26140890222925e-06
AT2TE15525	29.5241732807984	4.76766686150209	0.902791951193248	5.28102499717739	1.28463160261058e-07	3.32129388756913e-06
AT2G19830	1495.9366450039	1.0462631949745	0.198124833007548	5.28082814805269	1.28601272141833e-07	3.32129388756913e-06
AT1G23350	59691.8291623042	-0.808965959984823	0.153483936779742	-5.27068810559462	1.35913254645134e-07	3.50191481874887e-06
AT1G73170	152.97657669442	1.63315265508095	0.309890108784	5.27010255825652	1.36347553603433e-07	3.50489669332936e-06
AT1G20760	1074.26780045106	-0.992348015947388	0.188410612089142	-5.26694332630204	1.38714006774087e-07	3.55218649543543e-06
AT5G49940	946.747507731954	-1.00470992762473	0.190763388810615	-5.26678590629453	1.38832957011201e-07	3.55218649543543e-06
AT5G02020	1807.13714734409	0.915800708523288	0.173991879974662	5.26346809205497	1.4136305114041e-07	3.60852967203432e-06
AT1G79910	39100.7864002905	-0.949948857975282	0.180500168488955	-5.2628696467583	1.41824135698752e-07	3.61191930777239e-06
AT1G14420	193603.535138676	-0.87351493979676	0.166018533697288	-5.26155074583117	1.42845451527045e-07	3.62952807783036e-06
AT1G66210	111432.652171155	-0.986092035020959	0.187952545288314	-5.24649471231326	1.55020295658574e-07	3.92980021390698e-06
AT1G48950	160.578892338393	-1.65998067971036	0.316483126919889	-5.24508429838204	1.56210887900552e-07	3.95087859467098e-06
AT1G69940	189403.963911637	2.28581194154367	0.436038746503847	5.24222207285769	1.58654258212637e-07	4.00347281847577e-06
AT3G28790	139306.376803785	2.25863847771256	0.431176032137158	5.23832103217203	1.6204400888759e-07	4.0796525990418e-06
AT3G28780	13262.3869728964	1.15923105052688	0.221332833245505	5.23750151989899	1.62764960520433e-07	4.08844770695389e-06
AT5G56340	2644.82925636	-0.892285759855791	0.170451622379224	-5.23483289511095	1.65134194792018e-07	4.13851118702001e-06
AT1G45180	786.493458278915	-0.999816069244765	0.191951753211036	-5.20868422673664	1.9018446043221e-07	4.75547598562539e-06
AT2G21390	132.726546936255	-2.154891885197	0.413966290058728	-5.20547671862675	1.93499207166813e-07	4.8273883837852e-06
AT5G49970	111.3766672499	-2.48594461543017	0.478929726034621	-5.19062501301176	2.09589346810309e-07	5.21697283621499e-06
AT2TE12735	3249.37099869997	-1.09490707231306	0.211049474027476	-5.18791661224667	2.12659783156777e-07	5.28145131894099e-06
AT2G19770	6418.35335605088	2.33979734655018	0.451794258701854	5.17890013315606	2.23197907392616e-07	5.53068328183235e-06
AT5TE57655	208.184104669739	1.84174272096246	0.35571809188903	5.1775345785252	2.24837281271744e-07	5.55878599674545e-06
AT4G13780	51.7654205570266	-2.80036256663439	0.541137047403268	-5.17495998485481	2.27959831635994e-07	5.62334992748701e-06
AT1G58290	1513.25805166884	-2.86309091595704	0.55359678819864	-5.17179827808125	2.31851804209462e-07	5.70656275148211e-06
AT1G28335	1425.17854102944	2.89403358326699	0.560365973503043	5.16454196027531	2.41028405724674e-07	5.9191841959439e-06
AT4G01010	2160.83152735106	1.0236106944905	0.198501979244586	5.15667752223895	2.51370163901722e-07	6.15940878228673e-06
AT2G34825	389.904848460735	5.26495532036707	1.02156456805044	5.15381551497498	2.55239054581365e-07	6.24031128556483e-06
AT2G25880	7732.03531132513	-0.834588361830752	0.162010270685577	-5.15145341279312	2.58475436983552e-07	6.30542518335486e-06
AT4G01400	574.590951743087	-1.0706515334005	0.208243479897822	-5.1413448042927	2.72778921873786e-07	6.63963207622874e-06
AT5G57815	303.856207331351	1.46955041993546	0.286026384895629	5.13781419316156	2.77952500680042e-07	6.7506256346177e-06
AT4G01480	659.358205997729	1.26894559087423	0.247094354704996	5.13546977788793	2.81440106870681e-07	6.82027325064147e-06
AT5G58050	131243.279753217	-0.763800031226244	0.148823552930309	-5.13225236319895	2.8629527407991e-07	6.92268264929049e-06
AT2G33510	168.70461815215	-1.73295203460163	0.337841389710507	-5.12948409336871	2.90537318887692e-07	7.00984996140875e-06
AT5G23270	79733.9124194173	-1.09527219198399	0.213689081982427	-5.1255411920112	2.96684290103288e-07	7.12802813629444e-06
AT5G24130	170.341793353129	-1.50280001987585	0.293200015463245	-5.12551139365217	2.96731220362012e-07	7.12802813629444e-06
AT4G09000	5348.75388207835	1.09964812610553	0.214642445110144	5.12316250190517	3.00453193922834e-07	7.20171250444232e-06
AT5G45350	661.630523872969	1.00215236134402	0.195784095962723	5.11866071866651	3.07712950057179e-07	7.35969103593279e-06
AT3G15340	720.81166106372	-1.09492769116235	0.214145285351534	-5.11301329545945	3.17059972953347e-07	7.56679787946362e-06
AT1G13980	643.757500625666	-1.04390471525321	0.20424892446284	-5.11094351169099	3.20553829781104e-07	7.63362172132403e-06
AT2G32885	390.557063461199	3.53757668715992	0.692305879281672	5.10984637430851	3.22420874163754e-07	7.66149990831452e-06
AT4G32510	29364.8061141007	-0.852930478003345	0.166939142456367	-5.10923001911474	3.23474352554887e-07	7.66996729915705e-06
AT5G17400	14017.4132875309	-0.856842580766697	0.167832511315409	-5.10534326186913	3.3019457850608e-07	7.80045234619687e-06
AT5G60460	278.628314215474	1.3541744879339	0.265252486030003	5.10522826082289	3.30395454765292e-07	7.80045234619687e-06
AT5G03495	170.381520860986	-1.57414130067302	0.309127144544752	-5.09221311829876	3.53907968579322e-07	8.33767766661606e-06
AT1G71020	390.501034649405	1.25473873235705	0.246690397473669	5.08628931327162	3.65136922656241e-07	8.58383851082044e-06
AT3G47730	3099.06951507584	-0.948950544684388	0.18683953428787	-5.07896012640615	3.79506342723663e-07	8.90262000564123e-06
AT1G29340	1282.19873097327	-0.901340545730119	0.177551024911647	-5.07651558856754	3.84419273108278e-07	8.99868264412186e-06
AT1G65280	49.5955931036536	-2.6724454863271	0.527286722922012	-5.06829656456638	4.01391674440617e-07	9.37603227642393e-06
AT5G65950	658.535096396885	-1.04085572789489	0.2054170896767	-5.067035705418	4.04058514210815e-07	9.41833002827836e-06
AT3G56240	1341.86967769968	1.09718443802183	0.217361053380468	5.0477508318904	4.4704164437065e-07	1.03982075504564e-05
AT4G13980	1897.69473612689	-0.87917915445477	0.174186776767194	-5.04733580109712	4.48013517560881e-07	1.03988285236388e-05
AT5G39410	1171.6993492704	-0.942253799274316	0.187279968896293	-5.03125777320101	4.87272469722364e-07	1.12862562355483e-05
AT1G54410	1887.69469195917	2.33042272636647	0.463379120216188	5.0291923496234	4.92550097797852e-07	1.13845297814537e-05
AT3G59290	64713.6295099914	-1.03714154249112	0.206332165523468	-5.02656258106861	4.99349577797448e-07	1.15174927776258e-05
AT5G46250	13870.120659782	-0.960039166129289	0.191148394561791	-5.02248092813013	5.10082637209171e-07	1.1740437603714e-05
AT1G54920	8692.45830877072	-3.09115450556613	0.615694833448018	-5.02059516766614	5.1511621881129e-07	1.18315420445967e-05
AT1G48300	3992.45052352288	-0.796284994864692	0.158896680195476	-5.0113381468077	5.40528358211119e-07	1.23893604104974e-05
AT3G07480	358.400669627819	1.44363140662957	0.288787227396595	4.99894479282845	5.76449028967467e-07	1.31852229037424e-05
AT1G29140	221098.21851908	0.904823147629162	0.181248570025928	4.99216709682027	5.97055655087613e-07	1.36282288740123e-05
AT1G19090	2925.57486497573	-0.796113680424167	0.159697893940444	-4.9851232272422	6.19223348674335e-07	1.41049591762216e-05
AT3G44330	28.5203975269516	-4.65829042137583	0.934851214730034	-4.98292171842666	6.26312934806788e-07	1.4236972951951e-05
AT4G26970	938.003025175837	0.977276560162639	0.196358013169838	4.97701389612939	6.45726875914234e-07	1.46480146160998e-05
AT1G54290	4310.37287359807	0.874953490127553	0.175928140948512	4.97335722079632	6.58032435064606e-07	1.48964461946107e-05
AT1G63170	563.919529472763	-0.989665997069012	0.199398049760393	-4.96326818771922	6.9316762139903e-07	1.56596102066368e-05
AT1G07600	75.130737151463	2.47463314816524	0.498847626293025	4.96069945557208	7.0239796639649e-07	1.5808323596574e-05
AT2G47050	560979.390889458	-0.872586319409298	0.175902072786326	-4.96063693615058	7.02624090049508e-07	1.5808323596574e-05
AT1G72330	108726.857890451	-0.807901438488416	0.162894633404796	-4.95965656818641	7.06179125178839e-07	1.58558831330971e-05
AT5G62200	28.4276410646779	4.86930540284663	0.984475491128791	4.94609103702879	7.57185584285229e-07	1.69665087541875e-05
AT4G16860	677.823938623667	-0.962894844651863	0.194929717756916	-4.93970265658838	7.82417891753824e-07	1.74962635062512e-05
AT1G76200	140.038497030869	1.7841156610744	0.361574950245885	4.93428999951776	8.04428432842664e-07	1.795197082786e-05
AT5G16220	2149.91624129446	-0.840866823174307	0.170564935541237	-4.92989265645995	8.22748116155144e-07	1.83236331456253e-05
AT3G03800	24093.2917884028	-0.773081459901907	0.156888064712535	-4.9275989306033	8.32462758523432e-07	1.85025358975249e-05
AT1G80550	192.844595132382	-1.53108781493906	0.310909633312834	-4.92454286033168	8.45577945781682e-07	1.87561462892945e-05
AT5G37780	595.931999390591	1.39693654285747	0.284111355676904	4.91686275449716	8.79421600310847e-07	1.94675984841447e-05
AT4G24580	19143.6391112999	-0.8067943368538	0.164453571681365	-4.90590948317618	9.29954072529931e-07	2.05448889678199e-05
AT4G37830	987.872469733637	1.20332690507257	0.245440652438477	4.90272044633765	9.45184500646712e-07	2.08395187898099e-05
AT4G29380	541.056830516157	-1.07250652579529	0.218811080165999	-4.90151835538514	9.50987621103861e-07	2.09255316147694e-05
AT5G44340	59374.5126737619	-0.748922045906808	0.153075965473956	-4.89248618219054	9.95701087190493e-07	2.1865675371796e-05
AT5G19510	188.77294216617	1.78757453197837	0.365730006195207	4.88768901019365	1.02026527011959e-06	2.23604751032983e-05
AT3G46520	24639.5600285352	1.00000184052757	0.205467000404213	4.86697055274216	1.13321906217029e-06	2.47866324492993e-05
AT1G67090	57.7194010104237	3.03153178146249	0.623571166140999	4.86156504031974	1.16461301999011e-06	2.54227627895461e-05
AT1G70540	7187.48569009943	-0.789047830062731	0.162332419428303	-4.86069161564629	1.16976356340031e-06	2.54548573517804e-05
AT2G45310	36150.6549347437	-3.0572891389245	0.629029215446636	-4.86032931992468	1.17190642864998e-06	2.54548573517804e-05
AT1G28305	3464.55992674159	3.68142240317764	0.757472410451831	4.8601405838421	1.17302423898861e-06	2.54548573517804e-05
AT3G12630	8106.47049351955	-0.802456140282313	0.165358170181982	-4.85283635758175	1.2170811574471e-06	2.635891120912e-05
AT2G43386	292.498300529269	1.33361761331833	0.275055994077057	4.84853136101705	1.24378869927247e-06	2.68844072090288e-05
AT3G43810	624.546967777604	1.35343461376025	0.279199036437205	4.84756190791744	1.24988034829335e-06	2.69631050822028e-05
AT2G06005	493.979460282714	-1.35567572264971	0.279808473205079	-4.84501311601133	1.26603314898809e-06	2.72581148829099e-05
AT5G25350	1686.123268187	-0.82108028563103	0.169710576751012	-4.8381208840959	1.31072419110913e-06	2.81652100597317e-05
AT2G47170	3283.2400247026	0.891588129465481	0.184499310933914	4.83247403446857	1.34846703837976e-06	2.89197550804173e-05
AT3G23270	517.217872747933	-1.20522133173159	0.249859083226902	-4.82360423389973	1.40987034632029e-06	3.0177808463455e-05
AT1G51915	95.2805996990898	2.2270558587172	0.462107775278971	4.81934297117756	1.44031765840018e-06	3.07696599567355e-05
AT5G40155	2484.06151158947	1.01363563051898	0.210460742226654	4.81626938969623	1.46267027168961e-06	3.11866246688548e-05
AT3G20190	35931.7950371145	-0.815991489511283	0.169472281495456	-4.81489646749792	1.47276227073999e-06	3.13410648020917e-05
AT2G33390	717.423764235487	-1.08098930846602	0.225052980600357	-4.80326590468764	1.56098365161945e-06	3.31543284461722e-05
AT2TE06360	52.1723592471766	2.60784180394045	0.543714057951516	4.79634794392791	1.61584510259609e-06	3.42534254696767e-05
AT3G02750	257.812307818334	-1.2439063014616	0.25944018094169	-4.79457845329352	1.63017259387006e-06	3.44906901495354e-05
AT2G40990	15695.9301970395	-0.754534944781411	0.157439632794133	-4.79253496334076	1.64687059766074e-06	3.47478596972809e-05
AT2G46260	44403.9328492316	-0.81987899826491	0.171088409896518	-4.79213640924484	1.65014641250175e-06	3.47478596972809e-05
AT5G26700	582081.143185421	-2.80418440294177	0.585188295990549	-4.79193521496379	1.65180245606961e-06	3.47478596972809e-05
AT4TE08720	111.04774039378	1.6301689111887	0.340398377893786	4.78900317115308	1.67611832668045e-06	3.51920874620961e-05
AT2G35190	1769.62757594166	-0.836298056711263	0.174737489781564	-4.78602535584496	1.70116574613052e-06	3.56499534074818e-05
AT1G43670	2189.35389529124	0.881524556784187	0.184404701888497	4.78038004322263	1.74964130849928e-06	3.65961096503975e-05
AT3G59830	5616.82613873269	-0.800009199846245	0.16779000537935	-4.76791926931245	1.86138338668226e-06	3.88594687291806e-05
AT5G17920	1308.53288873685	2.49844188317056	0.524405807954054	4.7643291612618	1.89482975296897e-06	3.9482797238948e-05
AT1G08200	3233.49308735142	0.942215412124594	0.197988517375611	4.7589396830377	1.9461257555231e-06	4.0475001062883e-05
AT3G51730	254.761901644306	1.26351731825256	0.26557672884542	4.75763566990839	1.95873608735428e-06	4.06604045907015e-05
AT4G39610	58204.4747827264	-3.23093867171425	0.680945179789681	-4.74478528904804	2.08727614385751e-06	4.3247103831865e-05
AT5G12130	108.676909553119	-1.93447078235366	0.407796382792143	-4.74371736479986	2.09831561030009e-06	4.33254949442524e-05
AT5G66290	143.202658609842	-1.53425138227487	0.323432154307532	-4.74365755488875	2.09893553947342e-06	4.33254949442524e-05
AT1G10600	373.995910937528	-1.05645721116747	0.223302917421698	-4.73104974787408	2.23361769992288e-06	4.60192171059017e-05
AT4G33467	85.6574105715569	2.2798164685522	0.482635573361289	4.72368096009696	2.31613674536946e-06	4.76301616309435e-05
AT1G64750	2152.7725092042	-0.860630630873867	0.182381264139072	-4.71885440062311	2.37176490301589e-06	4.86831295951135e-05
AT3G07070	359.491990549266	-1.15444730520522	0.244695305043192	-4.71789724368209	2.38294792696032e-06	4.88215886264756e-05
AT2G37290	154.788895002883	1.63055466632423	0.345790812602643	4.71543663653651	2.41192946998818e-06	4.93235093472303e-05
AT2G45070	2403.39911891217	1.02073926760118	0.216767680713079	4.70890893071956	2.49046304442611e-06	5.0835017467117e-05
AT2G19280	25.575659648842	-4.62105846122731	0.981520158588037	-4.70806271353094	2.50082168738993e-06	5.09519263049333e-05
AT5G54780	45284.935810042	-3.01039667505867	0.640235529609896	-4.70201439287967	2.57607336412013e-06	5.23880945509237e-05
AT2G45250	715.774776142216	1.04451578594875	0.22269157179615	4.69041453847607	2.72652093191264e-06	5.53453566289721e-05
AT1G14260	178.137477417436	-1.38808408977444	0.296121757988181	-4.68754508012154	2.76501806851506e-06	5.60234416018466e-05
AT5TE26970	67.4376490461522	2.2064877966654	0.470802534231794	4.68665233560333	2.77710129101492e-06	5.61648316245335e-05
AT1G14450	309.194000539237	1.23517694151801	0.263987465460521	4.67892268810288	2.88386148324513e-06	5.82169615388311e-05
AT5G41920	347.79836888553	-1.06885392315845	0.228472196798803	-4.67826693197032	2.89309766502582e-06	5.82964478216374e-05
AT3G54110	1035.84885517366	0.972500756855538	0.208253438765561	4.66979447071854	3.01501230258412e-06	6.06419841920119e-05
AT5G42390	668.778478107298	-0.953346799583426	0.204263174287518	-4.66724754919116	3.05261463201365e-06	6.12055375016671e-05
AT4G00570	434.261111341926	1.07732771309649	0.230832342786215	4.66714369439232	3.05415743395885e-06	6.12055375016671e-05
AT2G43790	7142.26316402557	0.720807808498339	0.154492861937401	4.66563826612522	3.07660531440141e-06	6.15432939437168e-05
AT4G33630	764.70140694059	-0.927180728507687	0.198915473186429	-4.66117951336398	3.14402346186683e-06	6.27777606668945e-05
AT1G11780	26291.171234585	0.890259255307574	0.191198631906267	4.65620096980617	3.2209753650739e-06	6.41977734901143e-05
AT3G28770	12405.1868433711	2.79495793335903	0.600548267462713	4.65401048473188	3.25540238386863e-06	6.47666130692996e-05
AT3G26934	34849.4789823522	-0.719763462834144	0.154695474964574	-4.65277644998326	3.2749523630054e-06	6.50379528840893e-05
AT1TE01985	87.4408920863337	-1.84848398903859	0.398861477930354	-4.63440089183382	3.579726825387e-06	7.09624405998337e-05
AT4G18640	22467.6710751322	-0.800797580133198	0.173000068220515	-4.62888592108796	3.67638213588282e-06	7.27474033434942e-05
AT2TE84830	615.243928970703	-3.45207506872824	0.746145871442417	-4.62654180750855	3.71821839475118e-06	7.34288393576846e-05
AT5G03760	21913.2972534852	-0.890015807807286	0.192385496386975	-4.62621052273638	3.7241676387555e-06	7.34288393576846e-05
AT1G61860	38732.6673865051	-0.804320454996307	0.174055968573614	-4.62104495230874	3.81812026425308e-06	7.51466174370526e-05
AT5G02830	178.409791158766	-1.45079101232517	0.314061904321841	-4.61944283073074	3.84771875317163e-06	7.55939316471325e-05
AT4G13075	6716.33830344496	1.93236569034363	0.418509608635789	4.61725525643853	3.88848859411399e-06	7.62587370988273e-05
AT1G19110	10405.3596265528	-0.747138256260182	0.161886354222739	-4.61520218827213	3.92712806456265e-06	7.68794714703173e-05
AT1G61690	722.345213997599	-0.889923117938325	0.192933317312736	-4.61259429078183	3.97674046491647e-06	7.7712430897e-05
AT1G24620	3822.53410275511	1.01635946504011	0.220431434452097	4.61077372002941	4.01173029232042e-06	7.82571926881371e-05
AT4TE69880	6169.50139014419	-0.70917854139713	0.154024234288241	-4.60433090074626	4.13794080751844e-06	8.04687412787475e-05
AT3G28840	1050.50665947635	1.18097012150944	0.256496160424881	4.60424093504241	4.13972982764689e-06	8.04687412787475e-05
AT3G54240	20957.1706769706	0.813686253602512	0.176750699130272	4.60358152814318	4.15286516060208e-06	8.05816975254745e-05
AT3G05820	6712.67568919098	0.98072641102136	0.213259821832526	4.59873970912125	4.25054448075334e-06	8.23318492557188e-05
AT2G36880	4877.28089354207	1.07914043883357	0.235095976574461	4.59021228077793	4.42795442626679e-06	8.56174948994504e-05
AT5G16540	49129.5393718381	-0.79304505668532	0.172783396251609	-4.58982213505328	4.43623867021662e-06	8.56271892100408e-05
AT1G52570	1481.58618563721	-0.938319933994074	0.204507341385183	-4.58819682285526	4.47091014627843e-06	8.61452774594663e-05
AT4G00840	863.596375492261	-0.969977636665883	0.211680322955347	-4.58227587299409	4.59942559977964e-06	8.84665742111461e-05
AT2G34585	53.7284105839811	2.48655474549935	0.542873089292259	4.58036103565394	4.64173949601263e-06	8.90005879797499e-05
AT3G21350	123.880833644055	1.69943243744824	0.371031813308693	4.580287663997	4.64336825126127e-06	8.90005879797499e-05
AT1G01320	2542.53660961879	-0.963731716393885	0.210426504902763	-4.57989698987407	4.65204993039908e-06	8.9011918842175e-05
AT3G08730	46276.5637630264	-0.738209231150397	0.161378635706947	-4.5743925639013	4.77603606330211e-06	9.12256055007808e-05
AT4G37930	3487.9995612567	0.807213667026123	0.17655661604106	4.5719819802074	4.83132495578576e-06	9.21217281864037e-05
AT2TE23560	25.0324333084508	5.66557317258845	1.24239618140558	4.56019847564141	5.11052951184379e-06	9.72768956562376e-05
AT4G03380	96.0429686211761	-1.90931336847672	0.418834333138043	-4.55863623731971	5.14868606501549e-06	9.78339276119178e-05
AT3TE59735	1459.7616968934	0.982506386783535	0.215910228201756	4.55053192693325	5.35104665882814e-06	0.000101503819552461
AT3G57530	5487.39335830078	-0.737772647803891	0.16220532740436	-4.54838727931977	5.40585853539637e-06	0.000102367049236542
AT2G46000	213.66323168256	1.30608945231758	0.287611586015597	4.54115729623893	5.59462698621228e-06	0.00010575959811393
AT3TE51035	25.9255519005587	3.39235801727228	0.747185342290273	4.54018277028029	5.6205485106686e-06	0.000106067366576974
AT4TE07570	95.4806126395032	-1.90231222694422	0.419402909944195	-4.53576306181886	5.7395587809058e-06	0.000108127783745763
AT4G32470	731.632981772508	1.27822635221051	0.282382872730396	4.5265718131244	5.99482336282308e-06	0.00011274366946629
AT5G17550	282.151150098692	-1.13956337802064	0.251822688634486	-4.52526094531016	6.03210311849821e-06	0.000113062154072326
AT5G35080	84.8623978156766	1.85895000644963	0.41079465277931	4.5252536610994	6.0323108926064e-06	0.000113062154072326
AT3G57650	293.308691856772	-1.24539352626237	0.275685697126745	-4.51743974838785	6.25918300589289e-06	0.000117114849372166
AT3TE44935	601.230380101409	1.15883132170183	0.25655865210869	4.51682807099759	6.27728314915416e-06	0.000117254107312384
AT4G22780	968.833202738964	-1.05733777407928	0.234266723782035	-4.51339292670111	6.37986656298727e-06	0.000118968291399976
AT4TE69885	4169.61406460554	-0.702056986570903	0.155614523875937	-4.51151325136344	6.43667612657523e-06	0.000119824552867311
AT5G48580	110.7166848559	1.92536812005499	0.426959237903129	4.50948931216668	6.49838682502412e-06	0.000120769006501546
AT4G29470	1346.77426447336	0.911882999924576	0.202612622466835	4.50062285765952	6.7754629376756e-06	0.00012570597511013
AT3G61580	71792.0848901926	-0.754290316311254	0.1679151317212	-4.49209257426334	7.05267525433852e-06	0.000130628843683893
AT1G07770	33.854368538522	3.1067292670454	0.691765987903798	4.49101187593722	7.08855980551115e-06	0.000131072831899552
AT2G47600	1414.64402227698	-1.01821446572262	0.227027821367807	-4.48497659708859	7.29219378866668e-06	0.000134611939702871
AT1TE31925	460.359642508343	3.49310332233534	0.779104828311333	4.48348308905548	7.34344247964837e-06	0.000135330911492615
AT1G33050	5543.53814183087	-0.765096915886358	0.170677025836412	-4.48271764835929	7.36984136205111e-06	0.000135590292082419
AT1TE51700	20.8912434598707	4.62368260775439	1.03177071580739	4.48130823730175	7.41868737235827e-06	0.000135888312683321
AT5G27430	217.847488503697	1.31247056701334	0.292884284600206	4.48119150129511	7.42274694932812e-06	0.000135888312683321
AT1G32280	57.2441031041118	2.80249595964075	0.62539219564885	4.48118153558525	7.42309361231373e-06	0.000135888312683321
AT3G19100	26.6189638352459	-3.70857415175238	0.829347387403849	-4.47167762035343	7.76083612740125e-06	0.000141612225002468
AT2G22180	16081.3521828333	-0.763002862631168	0.170630826176919	-4.47165895944292	7.76151351358736e-06	0.000141612225002468
AT2G40860	663.923127052657	-0.980955045138477	0.219634813982915	-4.46630034350923	7.95838635823493e-06	0.000144963852174339
AT1G45145	206.994130985958	1.38416738995927	0.310193235594705	4.46227457960368	8.10942193271238e-06	0.000147470843146614
AT5G63400	293.211101614935	1.44363278190729	0.323778121082019	4.45871011012999	8.24543465899358e-06	0.000149696818676976
AT1G06890	17905.1832015245	-0.695436921227577	0.156159277990787	-4.45338202235161	8.4528162736968e-06	0.000153209035656033
AT4G20850	175.970766051897	-1.3258810090637	0.297952497872829	-4.44997447086216	8.58804974459428e-06	0.00015540415014807
AT5G40370	815.544941516081	0.963313191406283	0.216575491844933	4.44793260400863	8.67007221134943e-06	0.000156630762675314
AT1G31750	3234.64088319229	0.923793488906859	0.207850630039392	4.44450656094611	8.80938198849387e-06	0.000158886591208868
AT5G18670	296.995657358129	-1.09446504154989	0.246584795109422	-4.43849362676326	9.05906663835337e-06	0.000163113269694806
AT5G63470	898.496915597403	-0.830781865568228	0.187190870433326	-4.43815376062443	9.07337948129625e-06	0.000163113269694806
AT5G58740	1194.10267655772	0.894593270566031	0.201848756875373	4.43199791970172	9.33639188783692e-06	0.000167567673001602
AT2G38500	17163.8775611326	-0.816489416376921	0.18470290579041	-4.42055533930486	9.84475691683943e-06	0.000176403934200436
AT5G67590	73.6922919552021	2.040102620314	0.462435771530973	4.4116453481959	1.02588051723313e-05	0.0001835241861886
AT1G07280	23.1515177159839	-3.61953266589807	0.820716866831381	-4.4102086994658	1.03271041855187e-05	0.000184446104300449
AT3G06260	65468.6594310457	-0.702256359402872	0.15931652481632	-4.40793169580192	1.04362444168388e-05	0.000186093291854231
AT2G19940	57.7092596738719	2.2125947013054	0.502273097544438	4.40516267369793	1.05704523410358e-05	0.000188181418537339
AT4G32160	697.455064369181	-0.885790661981281	0.201514098422095	-4.39567588033413	1.10428607193194e-05	0.000196273915402184
AT1G27500	3931.56078755839	-0.708891966769143	0.161319010761494	-4.39434858559369	1.11105411532578e-05	0.000197158344787327
AT3G59920	2079.129596183	0.989458136650557	0.225188091527921	4.39391856797132	1.11325530993943e-05	0.000197230836070106
AT1G64040	214.494522136713	-1.37918174582541	0.313918459654407	-4.39343945349296	1.11571272730504e-05	0.000197348415205949
AT1G53320	23017.5257383611	-0.719786530755858	0.163903892724242	-4.3915157766683	1.1256316617542e-05	0.000198783299239481
AT2TE06370	41.3205071014542	2.50053605935489	0.570354958565862	4.38417519090637	1.16426052471702e-05	0.000205275549566293
AT2G45820	3727.28676151822	-2.35500385438989	0.537840367401385	-4.37862978892466	1.19427808793972e-05	0.000210231160376204
AT5G23590	238.220905754674	-1.12187313687304	0.257497973704256	-4.35682316537972	1.31963797752428e-05	0.000231927428573836
AT1G44000	2309.91612544472	0.789103029769442	0.181219230529801	4.35441110450845	1.33425109629491e-05	0.000234121699544443
AT4G22850	119.864806148216	-1.51513406845559	0.348446479006566	-4.34825478155295	1.37225135315686e-05	0.000240406200436812
AT1G07645	352.923014596388	1.33610450047875	0.307573136855536	4.34402208898467	1.39897439405814e-05	0.000244698192105367
AT3G60040	1629.69791314593	-0.772180283876841	0.178246258376174	-4.3320981372143	1.47695077947222e-05	0.000257927182154816
AT5G50930	879.694865611409	1.11378770176064	0.257205281704507	4.33034537385678	1.48875655710845e-05	0.000259576856439099
AT3G52590	258.03731327691	-1.30253709717095	0.301670164127533	-4.31775247293031	1.57626057715919e-05	0.000274399032751668
AT5G54130	9453.60285932919	-0.745142159294294	0.172658012726826	-4.3157114316683	1.59089695261026e-05	0.000276509451384172
AT3G52010	70843.3943756079	-0.724338341662771	0.167972649757179	-4.31223977659382	1.61609034230416e-05	0.000280445204196063
AT5G40720	27850.2639977194	0.720346011921488	0.167110528970607	4.31059620455268	1.62814975503388e-05	0.000282078051680659
AT5TE08530	294.186864645263	1.29995434832476	0.301595347912055	4.31025994705935	1.63062753016632e-05	0.000282078051680659
AT5TE08540	294.278614822702	1.29422943028277	0.300329553179734	4.3093642186729	1.63724541993415e-05	0.0002827782434869
AT2G03440	1071.97616561727	0.936980190036276	0.217710437531476	4.30379085477154	1.67900173028214e-05	0.000289535690228277
AT5G61240	77.1598739946035	2.0201358957589	0.470067236603294	4.29754668790874	1.72698893086113e-05	0.000297344792133555
AT1TE43445	160.819067005133	1.72288829107514	0.400963784625648	4.29686759038271	1.73228597693012e-05	0.000297790786221644
AT2G48150	4988.22427413637	0.819974309511428	0.190983077443319	4.2934396098774	1.75926181947523e-05	0.000301956295442535
AT3G59350	30980.6139819299	-0.702565545778458	0.163751310145822	-4.29044228808194	1.78317623013653e-05	0.00030546188636882
AT2G19760	1369.00837227166	0.873066454138439	0.203503192139303	4.29018554923111	1.7852389832317e-05	0.00030546188636882
AT1G80660	173.388728546232	1.48442328058019	0.346138198309465	4.28852778407613	1.79861303241066e-05	0.000307272369294753
AT5TE08535	295.54805098095	1.28980128130421	0.301012365596658	4.28487806056607	1.82839443719358e-05	0.000311875900744244
AT2G19000	8022.28479516233	2.48005836590584	0.579280995180917	4.28127003395181	1.85829696000334e-05	0.000316485807336792
AT5G62560	254.421607888932	-1.23548209523454	0.289078725439171	-4.27386032423376	1.9211741221791e-05	0.000326688681487086
AT5G17890	20.0456684193935	5.46581554987629	1.2793650965632	4.27228753118189	1.93477873003262e-05	0.000328494376355229
AT1G04670	41.5085892509826	2.82624685025605	0.662555965389184	4.26567263430481	1.99300835527472e-05	0.000337859444140716
AT2G26850	90869.1691734098	-3.27432768281466	0.768338539648362	-4.26156897493805	2.02996679708888e-05	0.000343595303101105
AT3G09735	32.8505918034978	3.05799809722865	0.717781128550236	4.26034897769624	2.04107960240259e-05	0.000344945588104967
AT3G03250	1506.19282600657	1.10696328583807	0.2598686712924	4.25970271958072	2.0469897334193e-05	0.000345413819740477
AT5G12140	830.588571095287	0.904079447728722	0.212288447006474	4.25873127095395	2.05590444757997e-05	0.000346386841229323
AT2TE08225	65.5282081690194	1.96345486866644	0.461089287368401	4.25829643510604	2.05990678061112e-05	0.000346530495417179
AT2G31390	32.8959993240834	-3.20151494541759	0.751969819401533	-4.25750457374149	2.06721432476188e-05	0.000347228885511911
AT3TE44915	338.269034144201	2.64415258103755	0.623125273743468	4.24337238827213	2.20185604661994e-05	0.000369280796111473
AT5G67170	170.639385753051	-1.26375555911188	0.2982784274063	-4.23683190937056	2.26695715974664e-05	0.0003796204364008
AT1G59700	232.730921563169	-1.10318424445044	0.260494011798025	-4.23496969022766	2.2858253534525e-05	0.000382198336454171
AT1G05385	76.380369681435	-1.86200202973272	0.439938001379386	-4.23241916791589	2.31191014920992e-05	0.000385973224000114
AT4G25610	881.95682186906	-0.782445301019504	0.185031413019841	-4.22871602313064	2.35028779226323e-05	0.000391785852886062
AT2G44350	657.657262655625	0.909061110105967	0.215160726527925	4.2250327221682	2.38906061344882e-05	0.000397646669730166
AT2G31490	216.074322707622	1.18303421282582	0.280161120718396	4.2226923200202	2.41401259974484e-05	0.000401192849280857
AT1G70490	2100.47438185547	0.82072402929949	0.194688380493186	4.21557787486047	2.4913939892909e-05	0.000413428607393341
AT4G24820	41.0257413609165	-2.38267025401922	0.566494972062262	-4.20598658686303	2.59945650715892e-05	0.000430711151984374
AT2G41905	208545.109375437	-0.70880523741191	0.168576044227086	-4.2046617042282	2.61472946229455e-05	0.000432590278859618
AT5G43210	188.751692086717	1.45475027021394	0.346105867379629	4.20319447696126	2.6317429141897e-05	0.00043475128441314
AT1G01460	23318.994555932	-0.644728943968135	0.153419264659184	-4.20239886692444	2.6410124981867e-05	0.000435628478336583
AT4G38130	311.60359593599	0.978062141009672	0.232995557643992	4.19777162663382	2.69554252817352e-05	0.000443957468487501
AT5G47620	26169.4393092751	0.64798326266385	0.154399585812422	4.196794047434	2.70719906588312e-05	0.000445210823958836
AT5G52510	97.0265055241929	-1.53325382421841	0.365457473662169	-4.19543704730952	2.72345924330635e-05	0.000447216396938155
AT3G11850	6094.16747702771	-0.797685059601107	0.190343527968763	-4.19076533945516	2.78015078907081e-05	0.000455845290333189
AT1G18540	354.633340129375	-1.11723773742051	0.266668720438155	-4.18960924845182	2.79435224862702e-05	0.00045749201546718
AT4G35090	1090.84092854737	0.80287816045837	0.191753438695096	4.18703396362561	2.82623546968639e-05	0.000462024407689297
AT1TE59245	537.253827089578	-0.841272846900034	0.201196783232711	-4.18134342598803	2.89791775138895e-05	0.000473039927311294
AT1G74780	2483.51695568194	-0.843891778219848	0.20187142189336	-4.18034296437284	2.91069762292487e-05	0.000474422151813621
AT3G57230	192.817234624621	1.22390484022179	0.292808971817802	4.17987479216775	2.91669642655598e-05	0.00047469665806167
AT1G54060	79.9171110555386	-1.67103787051712	0.399893310047442	-4.17870924201977	2.93168199100868e-05	0.000476430801552104
AT5G16470	3217.14897270572	-0.779059230592389	0.18649901776118	-4.17728329052117	2.9501150993711e-05	0.000478719267305027
AT2G39770	14190.7753377984	-3.18727346837843	0.763201787341791	-4.17618711229649	2.96436010343734e-05	0.00048032238377051
AT4G17690	235.229593835994	1.49531161559587	0.358111995751318	4.17554182305094	2.97277628097756e-05	0.00048097771534287
AT5G67265	615.986411210395	1.25198502401418	0.299981319001402	4.17354329990238	2.9989863206079e-05	0.000484072804419027
AT2G37270	72.6143029283164	1.74873081531589	0.419016980065186	4.17341276967782	3.00070580452442e-05	0.000484072804419027
AT5G55400	614.224671144964	-0.930035318130741	0.222867496711516	-4.17304152401638	3.00560137358041e-05	0.000484152654643216
AT3G16040	31328.1452858115	-2.61397806131265	0.626646831191185	-4.1713736209976	3.02768960960292e-05	0.000486997676679113
AT1G02000	68836.7767128841	-0.918505216743958	0.220226450057318	-4.17073070244242	3.03624497912644e-05	0.000487660835917505
AT5G58380	8853.68609840647	-0.703520434462938	0.169380371021186	-4.15349447058977	3.27436128631516e-05	0.000525138817376668
AT5G64780	892.319460306088	0.886714300541475	0.21374147680733	4.14853641785572	3.34607623373716e-05	0.000535859253618286
AT3G13870	158.430681608391	1.21927214332332	0.293983334245318	4.14741926256909	3.3624398509078e-05	0.000537697140111739
AT2TE24120	71.8218938555451	4.3598111774823	1.05247194100753	4.14244884600786	3.43617025572988e-05	0.000548690060283602
AT5G56270	2012.8782472998	-0.731403372963414	0.176587005938084	-4.14188670948906	3.44460489401939e-05	0.000548807829751746
AT2G39970	230.799729787287	1.07540017314014	0.259649680111902	4.14173502034231	3.44688429702287e-05	0.000548807829751746
AT5G19680	48.2065626681976	2.18671608574789	0.52947795687997	4.12994735160165	3.62846317649169e-05	0.000576883697511006
AT5G04347	446.041583675379	0.926616965612523	0.224468760450244	4.12804420425317	3.65861792726847e-05	0.000580838592147297
AT3G04240	1464.82108193677	0.80113013204888	0.194198911262242	4.12530702073325	3.70240518213339e-05	0.000586943253801607
AT1G26670	1803.1562968766	-0.689883173888547	0.167447255678594	-4.12000286951696	3.78867680530579e-05	0.000599755715280206
AT5G22030	519.923669648739	-0.882870755573802	0.21458992466236	-4.11422277612952	3.88486120296793e-05	0.000613477846778253
AT1G04540	89177.7644777639	-3.24399377173469	0.788501555425647	-4.1141247590609	3.88651208148011e-05	0.000613477846778253
AT3G10460	1435.26591142299	2.54520852967836	0.619034034479571	4.11158092756265	3.9295908625172e-05	0.000619389092685018
AT4G30140	52961.1004200207	-0.610040528454522	0.148830288364843	-4.09890039962205	4.1511761260466e-05	0.000653379681527392
AT1G64300	6152.33500487337	-0.684630636673929	0.167110329308264	-4.09687802966989	4.18759396964356e-05	0.000658170126485978
AT5G56640	9328.86711290338	0.682444201390938	0.167034056807443	4.08565902328326	4.39518852214651e-05	0.000689812612277546
AT3TE44900	341.982444070447	2.71435128097294	0.664496608689302	4.08482337679181	4.41103563176338e-05	0.000691313590037901
AT1G64200	2397.6843709544	0.755588444718694	0.185005067369523	4.08414999362967	4.42384501401704e-05	0.000692334891098371
AT5G39493	111.780630665288	1.44171035678094	0.353128731121365	4.08267645683422	4.45199844532147e-05	0.00069575123431004
AT4G16220	14.8987215122841	-5.2857283081477	1.29520795478326	-4.08098814451166	4.48446426751683e-05	0.000699830863421562
AT3TE65810	92.8991074807824	1.89939553203609	0.465602304754512	4.07943756429114	4.51447924204395e-05	0.000703517005962713
AT4G11350	21.4515611193689	4.05436984998955	0.994023913156963	4.07874478302348	4.52795107506452e-05	0.000704618355415274
AT1G23960	362.783436956849	0.960444885578386	0.2356425644851	4.07585483410879	4.58456140693308e-05	0.000712420121455901
AT5G19610	282.257126732148	-0.999170465736648	0.245227518333644	-4.0744630640401	4.61206320837668e-05	0.000715188200592268
AT5G19980	38.4906417526005	2.47743673380521	0.608094067869706	4.07410113781283	4.61924057103999e-05	0.000715188200592268
AT1G65970	139452.063446268	-0.661505625378324	0.162373775416415	-4.07396837132018	4.62187611907928e-05	0.000715188200592268
AT3G10540	5220.33482950102	0.640385517294288	0.157284065431328	4.07152190234991	4.67069695918643e-05	0.000720987856905714
AT1G42080	25.84066084312	2.98312498425646	0.732696409930574	4.07143387605668	4.67246266109593e-05	0.000720987856905714
AT3G57690	130643.724604816	-0.688702389484766	0.169171147661968	-4.07103929365607	4.68038529141324e-05	0.000721198865211883
AT5G03690	10104.6695502458	2.0403515559271	0.501296276847266	4.07015102677243	4.69826701403329e-05	0.000722941729907612
AT5G49910	1208.39601739859	-0.856000109829546	0.210369654483559	-4.06902845341909	4.72095823912138e-05	0.000725418750653818
AT2G37250	135.197461114437	1.37466228821164	0.338046349114666	4.06649056205412	4.77264171645995e-05	0.000732337575515932
AT5G44520	102.125410758058	-1.66055097319482	0.408622951778964	-4.06377313355873	4.82857594142465e-05	0.000739888475035571
AT1G07725	1405.37461054087	-0.78671360714275	0.193657299676995	-4.06240099626983	4.85705493276545e-05	0.000743217223508838
AT3G56490	38.0719312879739	2.98385443178135	0.735036863529346	4.05946229343397	4.91858494417326e-05	0.000751587104941586
AT2G20810	81.1317345641505	1.6412460803307	0.404424772231306	4.05822341513741	4.94474513483066e-05	0.000754536559964035
AT3G17090	4682.06642095905	-0.687465730725088	0.169493198762042	-4.05600776754616	4.99185999910396e-05	0.000760670965514428
AT1G56330	152.357663470614	1.27242829943045	0.313896453585404	4.05365618150971	5.04233087773195e-05	0.000767299091518768
AT4G02580	431.107292944265	1.17191616701611	0.289462381962561	4.04859574176961	5.15258557980759e-05	0.000782993736865236
AT1G15370	242.761278955628	1.15211513615678	0.28472435992356	4.04642278049579	5.20062694471727e-05	0.000789204105459025
AT3G19740	208.463508708428	1.11651762751966	0.275985424117342	4.04556737403983	5.21965506618884e-05	0.000791000620361014
AT3G46060	2840.34607888176	0.739119506930375	0.182781056786414	4.04374238734193	5.26047181021507e-05	0.000796089557854005
AT5TE40000	1976.77140570582	0.745926902205024	0.184562156906539	4.0416026487096	5.30871333607412e-05	0.000802153155733998
AT5G15870	44.4237076911231	-2.287418200768	0.566007717260676	-4.04131981068824	5.31512134639233e-05	0.000802153155733998
AT5G51970	613.179058328318	-0.889786857811125	0.220368733057508	-4.03771826186851	5.39736196711753e-05	0.000813448991263384
AT1TE51745	29.2011040358183	2.77127110954886	0.686579684599109	4.03634300826567	5.42908253489143e-05	0.000817110342665876
AT5G47890	65.5444269022819	1.99047519089916	0.493735476537378	4.03146074261988	5.54312564024306e-05	0.000833134812758936
AT1G26130	3200.79082319841	-0.683383605339713	0.16960283020934	-4.02931722599331	5.59390891747605e-05	0.000839620544475737
AT5G57490	678.825484845662	0.837357010399902	0.208108171170068	4.02366233719677	5.73000550631615e-05	0.000858876302186517
AT1G22300	465.851505801106	1.10972155777702	0.27587526479185	4.02254822886827	5.75718604474038e-05	0.000861776338288893
AT4G03000	520.579978775035	-0.888032231535206	0.221161487095964	-4.0153113600194	5.93673671667898e-05	0.000887359551307697
AT5G16780	2075.68221237886	-0.732715113857467	0.182493790913154	-4.01501393659007	5.94422822499339e-05	0.000887359551307697
AT4G29340	4194.66186936233	1.86321452997652	0.464098876171299	4.01469304417967	5.95232090961472e-05	0.000887363613110856
AT4G15420	348.533193543207	-0.986554550654406	0.245774682982621	-4.01406092231301	5.96829311432202e-05	0.000888540742134923
AT5G11520	928.197379079227	0.926814297024368	0.231140144547674	4.00975044312654	6.07829541417711e-05	0.00090325385454298
AT2G02090	1985.95852403231	-0.794299101815787	0.198101967009098	-4.00954676931254	6.08354032190828e-05	0.00090325385454298
AT4G28480	2017.84542907905	-0.687077264318445	0.17142457741615	-4.0080440895619	6.12236923482277e-05	0.000907793885734773
AT4G14930	159.864120820888	1.40465558881797	0.350871569804818	4.00333258576451	6.24564029028338e-05	0.000924049585620036
AT3G14420	72.8177435519943	1.72299326296901	0.430402593849104	4.00321300938322	6.24879923378755e-05	0.000924049585620036
AT5G53820	304.319070956472	3.74228994884235	0.935650252583202	3.99966754512212	6.34315278805702e-05	0.000936743180861789
AT2TE23570	18.9092606321071	4.18547376081766	1.04692372658891	3.99787840748893	6.39127660398597e-05	0.000942584788164257
AT3G03430	4944.01049161413	2.23391181614151	0.55957221532752	3.99217787258073	6.54692342342088e-05	0.000962967925636758
AT4G35790	15923.1591880249	-0.734774198697175	0.184053585806104	-3.99217540630391	6.54699153223319e-05	0.000962967925636758
AT5G35360	98.4598147493531	1.75480201378831	0.439929838347658	3.98882244582275	6.64020982204517e-05	0.000975375012845674
AT4G25030	434.826671287258	-3.36660125162579	0.844479301151151	-3.98660008248468	6.70268615498957e-05	0.000983239374362603
AT3G46270	171.886075990922	1.25220504830227	0.314539300753926	3.98107659456492	6.86038364739321e-05	0.00100503250184581
AT1G60740	87222.5230748165	-0.616876843120397	0.155054382914364	-3.97845473004846	6.93646146339104e-05	0.00101482644973708
AT1G11110	140.719144862556	1.54936588561096	0.390042628986667	3.97229884752911	7.11823385554072e-05	0.00103868703057264
AT4G24630	11686.1050044297	-0.82853422778305	0.208588024439111	-3.97210832218657	7.12393099052057e-05	0.00103868703057264
AT1G79990	790.647464605833	-0.859699668062501	0.216441275370831	-3.97197654000869	7.1278740963674e-05	0.00103868703057264
AT1G54630	147.21781150472	1.41052179621674	0.355259420229568	3.97039942052843	7.17522418659437e-05	0.00104420392196973
AT3G23870	353.388214841745	-0.889107050658078	0.223953245763179	-3.97005655188525	7.18555748136298e-05	0.00104432633302451
AT1G35160	2478.52363397931	0.85187856053875	0.215420617874901	3.95448944925714	7.66982561491727e-05	0.00111323774954248
AT3TE65820	1356.37541409544	0.91354232030202	0.231163382826456	3.9519335161653	7.75222804598905e-05	0.00112371558579673
AT1G11840	190.357498923662	1.25415426815015	0.317550362658696	3.94946570883976	7.83258303160257e-05	0.00113386945412752
AT1TE29570	46.3537676387092	2.19465174587772	0.556020491309987	3.94706990151947	7.91134644015036e-05	0.00114376653790452
AT1G67290	91341.3597543765	0.759582752680493	0.192573746154202	3.94437335228584	8.00089238481174e-05	0.00115519446217452
AT5G54570	385.455236359752	-2.62042542233636	0.664649325884255	-3.94256838950393	8.06136525300838e-05	0.0011624002688545
AT4G18630	91.070487793856	1.92973053468217	0.489737097853481	3.94033971112293	8.13663030127735e-05	0.00117171736354258
AT2TE19870	44.2090406958914	-2.1123579898872	0.536523810625591	-3.93711881570396	8.24657809845171e-05	0.00118599806848583
AT4G24380	984.385412922518	0.783856775429055	0.19917842576571	3.93545019956675	8.30408831170677e-05	0.00119270991651956
AT2G26410	61546.0437440931	-0.637602657843422	0.162145113507367	-3.93229647228594	8.41382079313248e-05	0.0012068951286316
AT5G10960	317.649687865771	1.04526858358714	0.265975668461428	3.92994062063511	8.49668417407301e-05	0.00121719426149936
AT1G73630	1521.5177348851	1.0426484699452	0.265776137923441	3.92303266234359	8.74412914759275e-05	0.00125101311939942
AT5G42420	26.1785469925076	-2.98982941526499	0.762998200935302	-3.91852747699796	8.90915747197851e-05	0.0012729681883988
AT2G34250	1050.83167606567	-0.716440754428761	0.183236756565218	-3.90991833657437	9.23273292792006e-05	0.00131749063129671
AT5G40740	541.004498788957	-2.71222893399076	0.693736875070133	-3.90959314901138	9.24517005408427e-05	0.00131755648879579
AT2G47020	799.903158304413	-2.04842283418397	0.52405719746579	-3.90877721761982	9.27644586871118e-05	0.00132030345986495
AT5G38895	1673.88818597581	-0.761614517390851	0.194916962437369	-3.90737936743486	9.33025982146211e-05	0.0013254883724347
AT3G42640	213835.014042799	-0.67174835031475	0.171925519402372	-3.90720558908186	9.33697044752673e-05	0.0013254883724347
AT1G07940	469.332276262035	0.865878387098134	0.221634269525203	3.90678927475009	9.35306538934742e-05	0.00132606218316495
AT4G20880	11640.9453803568	-0.683336307192315	0.175021065766632	-3.90430891389642	9.44950190828699e-05	0.00133801055334586
AT3G52300	507.167881096528	0.938226176057311	0.240526286838647	3.90072198922151	9.59062373190319e-05	0.00135624733031361
AT5G01280	782.052998858835	-0.886547394556409	0.227455567197736	-3.89767287509696	9.71214878070792e-05	0.00137166958774517
AT3G46430	434.297196365553	0.930576911650695	0.238817851935146	3.89659694244049	9.75537695308024e-05	0.0013760084261255
AT1TE46250	53.464097006865	1.89715632231679	0.48702774478443	3.89537627503442	9.80464013220168e-05	0.00138118630902027
AT4TE09845	345.958742143981	1.16721733071695	0.299688309741163	3.89477097630221	9.8291555418093e-05	0.00138286917226325
AT1G27330	1117.12522831572	0.827065658870077	0.212467249734497	3.89267362336357	9.91454956206951e-05	0.00139310184268057
AT2G46270	415.715863062428	-0.842155139444246	0.216427196629802	-3.89117057633358	9.97617662019537e-05	0.00139997315274731
AT3G22170	208.00760667757	-1.03980730201748	0.267404177081923	-3.8885230341743	0.000100856099909502	0.00141352714803101
AT2G04900	209.37381249564	1.18450602642903	0.304643154778373	3.88817542048748	0.000101000621065975	0.00141375169588786
AT1G15810	451.60170207024	-0.937583325227607	0.241183028989956	-3.88743490433008	0.000101309144317916	0.00141626836821565
AT3G26520	41.5211611243872	2.38787655965227	0.614725674139697	3.88445880838486	0.000102558077835247	0.00143190859434441
AT1G02990	586.311863303071	-0.77532593794262	0.199690408831037	-3.88263984475409	0.000103328555268558	0.00144083747156486
AT2G33100	66264.9657606878	-0.782020309371145	0.201434304587341	-3.8822598314284	0.0001034902098682	0.00144126492274675
AT3G52180	140.815931001688	1.30441720470446	0.336767335879086	3.87334834983166	0.000107350215352161	0.00149313156675661
AT3TE51110	258.761405803425	1.17366378371768	0.303160374393537	3.87142873162615	0.000108199293444759	0.00150304119504955
AT4G28060	283.924886625177	1.03664260400839	0.267819967439074	3.8706695916697	0.000108536818455158	0.00150582859601974
AT2TE08220	61.6886780358364	1.99141751513632	0.514666193578197	3.86933810688258	0.000109131216997993	0.00151216832419637
AT3TE68910	147.118649660566	1.26705101003381	0.327633347888009	3.86728340750866	0.000110054501249354	0.00152304355062313
AT2G47580	159.473042198572	1.14397531798188	0.296057678513716	3.86402853567225	0.000111532183681788	0.00154155412671738
AT1G04120	118.182932013095	-1.29564068105868	0.335540147617863	-3.86135814225798	0.000112758474421945	0.00155654797439177
AT1G62200	708.243103883186	-0.779355588482917	0.201980588089305	-3.85856678533052	0.00011405390244382	0.00157245743695102
AT3G55090	482.025163491618	0.844058565196892	0.219084060343754	3.85266990155524	0.000116836852812703	0.00160880983059494
AT5TE70005	47.455930529614	2.0178283611559	0.524105923481874	3.85003922060363	0.000118098912005743	0.00162415528735897
AT2G23985	269.978317122022	-0.973564385187519	0.252982804302206	-3.84834213484537	0.000118919892168425	0.00163221535983083
AT3G06830	18403.8152877481	0.647986524064354	0.168386266537713	3.84821480627832	0.000118981705015845	0.00163221535983083
AT1G11770	63220.3875557097	0.78452532914032	0.204092890767005	3.84396206154943	0.000121063729629486	0.00165870878379029
AT1G15500	164.312213464265	-1.19434434766567	0.310775454408234	-3.84311029305672	0.00012148483956846	0.0016624082150898
AT3G02410	6191.29393682181	-0.666769549218772	0.173542606017124	-3.8421086586252	0.000121981809282229	0.00166713523692308
AT5G42300	957.687677455154	0.864935569511597	0.225337809724276	3.83839521015108	0.000123841044664131	0.00169044562455926
AT2G16510	594.990571302246	0.758913126625446	0.197843235667274	3.83593163580159	0.000125089202973707	0.00170536730002072
AT4G01000	4904.44501719572	-0.768634594666319	0.200489368572452	-3.8337922860411	0.000126182704922256	0.00171814618756765
AT4G29000	229.980805744528	-1.11663694326788	0.2913064341285	-3.83320384463363	0.000126485055674502	0.00172013421820874
AT5G19500	42.3843927496035	2.35193326430626	0.613714320233113	3.83229327843108	0.000126954265584659	0.00172146682420725
AT5G43330	397.004802120667	0.907002000233913	0.236685108947584	3.83210420066933	0.000127051901823618	0.00172146682420725
AT2G17500	15085.7012363526	-0.613834888806001	0.160182246312899	-3.8321031383649	0.000127052450577739	0.00172146682420725
AT2G07180	38994.4572921387	-0.644331531008457	0.168393705882919	-3.82633975319985	0.000130062749549543	0.00176008655663478
AT4G33970	92382.4321456196	-1.79111427915398	0.468389763124365	-3.82398254651524	0.000131313214548073	0.00177482553618907
AT4G01660	1073.25606532485	-0.741857386812755	0.194458887400852	-3.81498319119513	0.000136192203571653	0.00183851119471819
AT5TE35975	25995.8370091971	0.64268568948361	0.168753870787992	3.80842043197354	0.000139857334220665	0.00188567449889185
AT4G29460	4638.03673725269	-0.684284000660734	0.179719679994901	-3.80750733965333	0.000140374574182897	0.00189033178110188
AT2G39270	463.950276891332	0.801401571948375	0.210548607892129	3.80625443203577	0.000141087242410016	0.00189614805604503
AT3G43120	42412.6936748857	-0.608782612466453	0.159947411573241	-3.80614232189488	0.000141151177776848	0.00189614805604503
AT5G02380	1357.24290866535	0.81186143941654	0.213332084641447	3.80562277250071	0.000141447828367182	0.00189669518578018
AT5G48770	298.251562300139	-0.997018296424891	0.261996283375081	-3.80546732793737	0.000141536697648203	0.00189669518578018
AT5G37055	998.038081551594	-0.813084493709835	0.213748686929024	-3.8039274317499	0.000142419917775299	0.00190583792907338
AT3G22050	30.7034207162071	-2.51344258649193	0.66079326679219	-3.80367463290508	0.000142565407710179	0.00190583792907338
AT5G05320	59.8854108221607	1.81910604217773	0.478305432487041	3.80323098719355	0.000142821071611016	0.0019069386284762
AT1G77180	5528.9244961651	-0.794971901112543	0.209057051614779	-3.80265527984871	0.000143153483664252	0.00190906015427163
AT4G13560	20386.8097694516	2.23390174573955	0.587561376639639	3.80198875309947	0.000143539244696256	0.00191188713093003
AT1G35720	93.5930697352934	-1.43492036240146	0.378255427825165	-3.79352219914397	0.000148525345797252	0.00197590792558811
AT4TE13135	20.1663434767372	-3.43420900628991	0.905588565766009	-3.79223980526412	0.000149294641576525	0.00198374353457117
AT3G29255	747.130469752062	0.782040630869693	0.20653054355237	3.78656162627776	0.000152746226630714	0.00202715800409061
AT1G04970	316.639433484273	0.877755733731833	0.232092821938849	3.78191676243698	0.000155625404580829	0.0020628803628895
AT5G15600	68418.4510682742	-0.630037002727101	0.166872602824835	-3.77555687429678	0.00015965059059103	0.00211368928722324
AT5G01410	5283.81475824817	0.732442260690087	0.194192991075596	3.77172346248563	0.000162123875505662	0.00214385442104964
AT5G56930	275.311491251111	-0.935322011022483	0.248081180898931	-3.7702255674264	0.000163100065148514	0.00215417396970462
AT1G20450	72.6189949491806	1.83371661804257	0.486693576372159	3.76770252796676	0.000164756863012606	0.00217344725043728
AT4G27080	119.306023209791	1.33965888775929	0.356201953081015	3.76095323501666	0.000169267076438578	0.00223027110775717
AT3G09200	41.0183954796977	2.50221533955842	0.665850051276192	3.75792617986976	0.000171327405547889	0.00225471784191133
AT4G10340	12.6635284549685	6.36090963783834	1.69363341179227	3.75577713190422	0.000172804422092627	0.00227073052238304
AT3G06670	361.572139320756	-0.860882835968428	0.229229117284557	-3.75555621452644	0.000172956933080984	0.00227073052238304
AT1G66410	29.6105220303908	2.68203904370398	0.714402522031134	3.75424072703245	0.00017386770836905	0.00227768841705732
AT1G14755	438.552837605497	0.974758703626828	0.259645347647152	3.75419283441768	0.000173900951674982	0.00227768841705732
AT4G24390	714.440952344626	0.776539589251659	0.20702873298488	3.75087833488491	0.000176216195252423	0.00230526822849841
AT1G04290	698.52464539206	0.834959254042664	0.222631245649678	3.75041361155799	0.000176543121194475	0.00230634208373683
AT1G04760	1038.20538761018	0.868217082374046	0.231514306501566	3.75016600699005	0.000176717540137261	0.00230634208373683
AT2G19330	5831.57821303969	-0.632628223980582	0.168864885073689	-3.74635747215601	0.000179420867405958	0.00233884879526108
AT3G56800	15611.487156169	0.689829355038054	0.184361450388813	3.7417223263498	0.000182763390209645	0.00237697067787265
AT5G57035	49.2305666388729	-2.48751189372753	0.664807406960685	-3.74170303712431	0.000182777421694262	0.00237697067787265
AT2G31360	134.717856041835	1.19471880158829	0.31944669272736	3.73996296968383	0.000184047366776661	0.00238889453190546
AT5G65330	250.553306137846	-1.03160845037364	0.275842045824708	-3.73985208559977	0.000184128573264482	0.00238889453190546
AT2G45990	111.089083472747	1.30820781088425	0.349876689575082	3.73905392918015	0.00018471410153515	0.00239366848656033
AT3G04090	4377.46756864139	-0.613959868780159	0.164300401398305	-3.73681295696758	0.000186367451023969	0.00241225258372436
AT2G37620	24800.0178116277	0.638444555718414	0.170933919837733	3.73503723733995	0.000187687413392744	0.00242648286973792
AT1G48470	61.4386249844789	1.79007118729039	0.479801075160429	3.73086114217616	0.000190826384701225	0.00246416887850103
AT2TE55605	27.0957939411012	2.59404066711286	0.695677560797043	3.72879738156402	0.000192395768275988	0.00248152197253507
AT1TE51705	15.4157021489893	4.14484574652412	1.11225971310925	3.72650892383531	0.000194150201466856	0.00250121840344069
AT4G34200	50.4976762517866	-2.04304906380287	0.548826175095722	-3.72257949148752	0.000197197795400128	0.00253750894151135
AT3G21570	17728.6642407409	-0.635898645535111	0.170873257552418	-3.72146381852666	0.000198071249033701	0.00254577089003362
AT3G01970	86.699317405627	-1.46095630759112	0.392634623078491	-3.72090544673912	0.000198509758581161	0.00254842982953318
AT1G07740	300.002713213569	-0.993152526687467	0.266940722321353	-3.72049838649898	0.000198830012386634	0.00254956619612791
AT3G56340	38.785089434686	2.44053396561149	0.656105228968327	3.71972948523674	0.000199436268762048	0.00255436301387667
AT5G40645	619.777185732879	1.01219510955805	0.272951426822976	3.70833419462034	0.000208627198131494	0.0026689725974915
AT3G01610	213.126221663332	-1.03765627091611	0.280246364850726	-3.70265737958393	0.000213352927198026	0.00272313277967767
AT1G61770	10177.9149211545	0.625542978059781	0.168944487660975	3.70265397066445	0.00021335579495384	0.00272313277967767
AT3G25165	40263.294667462	0.646724011407048	0.174681126927987	3.70231187982696	0.000213643763249885	0.00272364853218452
AT4G04980	13997.2008240542	-0.590010605111523	0.159486259437325	-3.69944474961735	0.000216071670633824	0.00275141263925155
AT5G60390	45.2231469497092	2.0024241586247	0.54137356273732	3.69878452966921	0.000216634407776579	0.00275538931139644
AT1G65960	43658.1573937884	-0.597040014202423	0.161508438921742	-3.69664903077737	0.000218464034433478	0.00277545185547012
AT5G39380	911.570461782406	-0.71611873910169	0.193755880079525	-3.69598454925739	0.000219036293796562	0.00277951246176445
AT5G11440	275.039428011218	0.94727378051044	0.256415687409448	3.69428949562599	0.000220502474729336	0.00279489427070525
AT5G47440	220.846376501681	-1.05166595802086	0.285062536954867	-3.68924646940669	0.000224919242844168	0.00284759667407542
AT1G73180	48.9420241729878	2.04777448155869	0.555238472868351	3.68809904504622	0.000225935707930865	0.0028571777685694
AT5G22120	381.1393713495	-2.54450022055134	0.690019347296781	-3.68757808099102	0.000226398634518187	0.00285974486448805
AT5G61480	132.682221276341	-1.25156875301762	0.339468918572333	-3.68684343262178	0.000227052953258066	0.00286232800692349
AT2G20815	40.8970405704496	1.96886684821733	0.53403652717659	3.68676438412664	0.000227123463919669	0.00286232800692349
AT5G17770	709.104830059285	0.816752919744323	0.221685010566193	3.68429474621808	0.000229336741711319	0.0028843636328422
AT5G65110	486.544255001764	0.806099088972173	0.218797251371447	3.68422859025628	0.000229396307829206	0.0028843636328422
AT3G44430	443.243977608588	0.976143528993286	0.265026260543677	3.68319549538531	0.000230328381244396	0.00289277722654207
AT4G38010	172.50304562452	1.06199281416223	0.288393741144175	3.68244057568264	0.000231011727212188	0.00289584448173204
AT4G00350	26074.2685187854	0.682811652024317	0.185428520198252	3.68234428713708	0.00023109902335582	0.00289584448173204
AT3G61200	881.613888110797	0.857197028570516	0.232805901737185	3.68202447693189	0.000231389188661234	0.00289618185853344
AT5G24500	128.447869790594	1.23743235520568	0.336122810794246	3.68148877572953	0.000231875999047193	0.00289897697899684
AT5G55930	222190.200970311	-0.701425657002588	0.19057205514838	-3.6806322755792	0.000232656327954213	0.00290543123740323
AT1G22730	2147.24092700603	0.651084005242724	0.176934583329235	3.67980070934581	0.000233416297622882	0.00291028679343554
AT1G61620	808.717738185968	-0.867766056565291	0.235829816240072	-3.67962826075357	0.000233574190020322	0.00291028679343554
AT3TE65825	541.850846971391	0.936144079701026	0.254434679986754	3.6793100679112	0.000233865787668579	0.0029106237510517
AT3G62180	106904.33585989	-0.576550171871524	0.156773027325857	-3.67761075808755	0.000235428858099191	0.0029267664370704
AT1G33170	133.870197839525	-1.14854384703999	0.312478550531957	-3.67559259694698	0.000237297950327198	0.00294667274209913
AT4G21810	130.709616880768	-1.31279203544005	0.357311909751875	-3.6740785840351	0.00023870926335345	0.0029608560489455
AT5G66100	422.830784215176	-0.829393322084561	0.225777556795158	-3.67349764014431	0.000239252887844381	0.002964257063135
AT2G01650	318.839173737175	-0.857295552953319	0.233400710972904	-3.67306315983263	0.000239660216434816	0.00296596366840927
AT2G28405	144.415706294252	1.31775556597611	0.358999684284701	3.67063154554497	0.000241951909475655	0.00299096057084399
AT4G32120	115.363280418676	1.21919759940573	0.332568701238478	3.66600222710516	0.000246371779600132	0.0030415374891663
AT5G55100	2075.4869647421	-0.606563461305218	0.165471744289864	-3.66566185609717	0.000246699721982823	0.0030415374891663
AT4G33030	31.9579491930191	-2.45777973117846	0.670520103723548	-3.6654825374062	0.000246872657500955	0.0030415374891663
AT2G36530	81.0998495780571	1.65003287567048	0.450301465871075	3.6642849307155	0.000248030552172758	0.00305238493848399
AT3G09350	335.083163720378	-1.13806684205064	0.310739674048589	-3.66244460265696	0.000249819788365025	0.00307096906323129
AT3G03860	408.281510867912	0.855463314243159	0.233690113188313	3.66067396935106	0.000251552685456335	0.00308881991673058
AT1G07730	288.551120061947	-0.988570125317625	0.270217592275111	-3.65842252162158	0.000253772432639191	0.00311260234548091
AT2G28440	3814.56071325816	0.726527890919874	0.198716360026961	3.65610506765171	0.0002560764323566	0.00313736404096583
AT1G69170	82.1472596256299	-1.41225201288343	0.386373272281116	-3.65514934442957	0.00025703230780136	0.00314557224741998
AT5G39310	1238.64296795356	2.06823354838177	0.566036365726512	3.65388811322604	0.000258298861469973	0.00315756008210294
AT4G30010	650.610446560373	0.824483423459985	0.225767812187257	3.65190863778287	0.00026029849624749	0.00317847286982784
AT3G03070	870.746504890076	0.85100497923915	0.233082066652791	3.6510959056616	0.000261123700889669	0.0031850143649536
AT2G47040	1556844.13843225	-0.645717425393596	0.176880191794508	-3.65059206936955	0.000261636500191491	0.00318773507763764
AT5G48630	213.650082053672	1.20423099535912	0.33034634403008	3.64535893047289	0.000267018858447955	0.00324971402726151
AT4G14960	11118.0790557229	0.554968082296703	0.152257486193505	3.64493133422282	0.000267463203725079	0.0032515250468324
AT5G50460	868.638203387446	0.815007165985108	0.223783268189174	3.64194862547161	0.000270582080402198	0.0032858102081512
AT4G02640	635.439799631776	0.761056332535183	0.209016488546404	3.64113060088185	0.000271443387647667	0.00329263522701172
AT3G62640	33698.7659618825	-0.61685701487128	0.169475514958919	-3.63980020961027	0.000272849661761866	0.00330473823241398
AT2G20840	2680.93206595272	0.679814657780782	0.186781827440186	3.63961883817891	0.000273041906313789	0.00330473823241398
AT2TE23870	1087.4641628408	-0.699942148049595	0.192348754959571	-3.63892216612847	0.00027378152448205	0.0033100487168698
AT4G01850	806.121434004784	-0.694115304598172	0.190828568878167	-3.63737625177771	0.000275429447733303	0.00332631699666498
AT2G36020	117329.858824152	-0.586225908295827	0.161184471136313	-3.63698750979589	0.000275845301561552	0.00332768641203969
AT3G59970	520.97036478686	0.805627553397694	0.221544290741284	3.63641757908578	0.000276456044523021	0.00333140131636613
AT4G20070	1460.03696347556	0.63378826401727	0.174445539042019	3.63315833410109	0.000279973096581819	0.00337009191312163
AT2G47015	560.201045857565	-2.05461243460407	0.566239692378506	-3.62852068171627	0.000285049918020764	0.00342646948209281
AT3G23600	52.1683809789031	1.99915432451056	0.550987327438793	3.62831271238745	0.000285279589674333	0.00342646948209281
AT5G03160	134.656761861167	-1.21410254038877	0.33480182591935	-3.6263318966523	0.000287475817163445	0.00344810706453739
AT3G07470	2778.64152190133	0.641779914517561	0.177000953256364	3.62585569574883	0.000288006161115933	0.00344810706453739
AT1G07920	594.626152934343	0.769838023619738	0.212319786735723	3.6258421104104	0.000288021304518257	0.00344810706453739
AT1G35340	132.306987176985	-1.14974999870501	0.317492736832574	-3.62134268070301	0.000293078003479674	0.00350483064596019
AT1G51650	348.759510135237	1.02263844280048	0.282455782785488	3.62052577828482	0.000294004955275921	0.00351209828224287
AT1G64235	200.484782937991	1.02438623891085	0.283379918731932	3.6148864869987	0.000300479248916957	0.0035817581611969
AT3G55400	1111.8865907352	-0.70372782619764	0.194675324687427	-3.61487942720811	0.000300487437082779	0.0035817581611969
AT3G47810	694.050957507739	0.752146918775059	0.208119936322458	3.61400705797686	0.00030150084803111	0.00358994840913233
AT2G18280	28102.9834757787	-0.584608567142704	0.161785003475012	-3.61349046318126	0.000302102472120729	0.00359322313326731
AT5G21120	382.696566223175	-1.15227265731584	0.318949401919245	-3.61271302088093	0.000303009997525771	0.00360012526217984
AT3G02555	20645.6491290954	-0.59690505563051	0.165257737877931	-3.61196433701288	0.000303886365149266	0.0036066427069819
AT2G19340	4321.0452777469	-0.607506686566528	0.168358484086794	-3.60841147900416	0.000308077595129503	0.00365244579915387
AT3G01130	169.377424527487	1.10810834545401	0.307234663033475	3.60671655506941	0.000310096073931755	0.00367241873562666
AT3G13227	16938.6232549654	0.751329007950557	0.208510905287041	3.60330797526518	0.00031419288442502	0.00371693560692911
AT4G22270	2095.41736773616	0.775914840400574	0.215473300928338	3.60097904036207	0.000317021136126005	0.00374557287281486
AT3G53750	3117.30221467642	0.622489959055227	0.17287762207747	3.60075498248278	0.000317294484408603	0.00374557287281486
AT2G03390	216.495388616556	1.01051117142413	0.280724990755097	3.59964807089689	0.000318648145447949	0.00375752078908718
AT2G37770	22.6809659643673	2.66525681140807	0.741689532315344	3.59349390180537	0.000326273288508364	0.00384331768754713
AT5TE40945	166.314426509825	1.37264765466501	0.382589172192345	3.58778489939835	0.000333499238578184	0.00392423382121624
AT1G27620	48.2134772030148	1.95425077829867	0.545136336975037	3.58488445137013	0.000337227474206354	0.00396386396497683
AT3G51390	115.845172641054	-1.27727153980411	0.356512713448688	-3.58268160326896	0.00034008503114366	0.00398939855300308
AT2G11000	62.3186356948677	-1.67476384845504	0.467464988243546	-3.58265087348637	0.000340125053873559	0.00398939855300308
AT4G02380	134570.318652801	-3.45052516861248	0.963410030521141	-3.58157488431585	0.000341529212885574	0.00400160213010339
AT4G13450	3316.63055033767	0.656116182155392	0.183208625287331	3.5812515984244	0.000341952157239622	0.00400229535526631
AT4TE21020	691.517659405005	0.919419398546141	0.257351344282252	3.57262325988769	0.000353423038858532	0.00413215757016107
AT3G08610	389.75629132485	0.809090463048571	0.22651403456338	3.57192199859998	0.000354370967144592	0.00413805581861667
AT1G27350	629.223714363209	0.907830286662187	0.254173594125222	3.57169394321479	0.000354679752495502	0.00413805581861667
AT1G60590	118.713968411242	1.20553210814263	0.337748694870154	3.56931685141253	0.000357913333214599	0.00417135857206252
AT4G15980	10465.4405745771	0.70249100475722	0.196908276285363	3.56760527291986	0.000360258658771187	0.00419424948550328
AT4G11150	625.638153734202	0.868385101650131	0.243499794035209	3.56626626766085	0.000362103468975092	0.00421127099964478
AT5G17390	315.157856269642	-0.878669985481662	0.246597485209665	-3.56317496398874	0.000366396293680222	0.00425669696205892
AT1G75050	281.04309548166	1.0403062054254	0.292090365126376	3.56159028037538	0.000368615312112632	0.00427677122902572
AT4TE78070	26412.9794885519	-1.76929732397661	0.496838094290199	-3.56111446426888	0.000369284041934817	0.00427677122902572
AT1G54860	45.4737135275371	1.93509021825576	0.543395244056499	3.56110996447101	0.000369290371530125	0.00427677122902572
AT3G51610	94.0493387522263	1.52883909252745	0.429517544272589	3.55943339897005	0.000371655767474254	0.00429948554116341
AT4G02970	585.518797021076	0.897344805616022	0.252122159792849	3.55916674025522	0.000372033288055587	0.00429948554116341
AT3G50830	52.973012192232	2.01342207531072	0.566011642178004	3.55720964954554	0.000374815018541138	0.00432653339531929
AT1G08840	35.1811028459964	2.07505769198428	0.583419759920751	3.55671479530646	0.000375521457763503	0.00432653339531929
AT4G39870	8772.28887857535	-2.99890747194688	0.843173136139972	-3.55669238428992	0.000375553480506264	0.00432653339531929
AT5TE43580	140.704372200921	-1.15523696247441	0.325259928455732	-3.5517346632868	0.000382700569306486	0.00440425906224892
AT1G74410	537.868875664557	0.777271657468015	0.218979596623672	3.54951634514058	0.000385939505328485	0.00443689282928316
AT3G57680	32.9785801855169	2.36474662148074	0.666838634629735	3.54620518169853	0.000390821778094056	0.0044883311091762
AT2G14530	29.3457643392657	2.28415085884214	0.644465544446226	3.54425597850209	0.000393722780970189	0.00451693225884673
AT1G19440	695.026292682543	-0.696660173066407	0.196784940519662	-3.54021080691791	0.00039980753962708	0.00458196099060118
AT5G01610	16382.1812031361	-0.646216291035419	0.182551623269476	-3.53990985925936	0.000400263719297805	0.00458241565006706
AT1G36050	9518.2071339119	-0.598415585330844	0.169194122527885	-3.53685799713415	0.000404917313755141	0.00463087347810193
AT5G23450	1433.34407423649	-0.711314225532414	0.201276109379138	-3.53402213370755	0.000409286802463968	0.00467598483978046
AT4G26100	2222.2052279753	-0.606603487247345	0.17172585867646	-3.53239454979355	0.000411814430314875	0.00469998170365586
AT4G23885	749.827515639981	0.963204810926359	0.272724869084633	3.53178210025084	0.000412769330386143	0.00470599810664077
AT1G08590	80.9165460818839	-1.39111431712448	0.393969297220288	-3.53102215563422	0.000413957072339666	0.00471465394397619
AT5G02500	227.918323018956	0.911123704974905	0.258131735749435	3.52968495845594	0.000416054774270612	0.00473364490850597
AT3G14940	50.9634179948153	-2.03082776071844	0.575558913479478	-3.52844463556527	0.000418009377519764	0.00475097021846327
AT2G01140	229.295073587547	-0.967810438359423	0.274916196919044	-3.52038348124108	0.000430923279266735	0.00489269135035357
AT4G24450	27.6285302075552	-2.27529160535774	0.647390231004175	-3.51455968346712	0.000440483677850139	0.00499608394196621
AT5G10610	72.319770187752	-1.46047973204179	0.416532468285679	-3.50628064614669	0.000454415813557664	0.0051487979204546
AT2TE55610	41.5396849867482	2.02780091238021	0.578579188218976	3.50479407775163	0.00045696058093235	0.00517230484713757
AT5G04180	228838.406828373	-0.55536703466137	0.158615571204243	-3.50133994061809	0.000462924948201553	0.00523442988706422
AT1G11910	1897.41566229476	-0.606259774963042	0.173279683416936	-3.49873547208818	0.000467470112009247	0.00528039648082724
AT1G49140	528.607062482829	0.84621542446715	0.241908077811481	3.4980866787202	0.000468608807270164	0.0052878298436783
AT2G41630	9912.27357755501	-0.642851961342825	0.183791450116065	-3.49772506249264	0.000469244601359713	0.00528957900016348
AT1G11020	57.5597727728448	-1.61354976758047	0.461802092440712	-3.49402870622035	0.000475789855722721	0.00535787102626548
AT1G70980	500.906493164442	-0.793916992940136	0.227418945757028	-3.49098880173488	0.000481236423448832	0.00541366373290802
AT4G15940	685.195116223166	0.857977449868319	0.246050675418529	3.48699489814004	0.000488480675870855	0.00548954483751905
AT2G25790	320.938838779933	0.993891332629204	0.285277285215801	3.4839483693115	0.000494074789103941	0.00554674574461383
AT4G17070	205.246315167767	-0.988028541714717	0.283660903125556	-3.4831326094925	0.000495582815476138	0.00555800421597194
AT5G35460	432.084192936689	0.843948455258427	0.242376340376307	3.4819754021706	0.000497729410693063	0.00557639406969967
AT4G23630	1873.16313848296	-0.591194524149611	0.16986892558801	-3.48029824821203	0.000500855887394845	0.00560571360439276
AT5G59460	17.5440743969161	3.52676021470922	1.01398094670902	3.47813262779314	0.000504920030621291	0.00564545749684496
AT3TE41320	5452.5671920741	-0.568916362153545	0.163817135309189	-3.47287456272367	0.000514915952226475	0.0057456605933557
AT1G08460	1407.59433068874	-0.637839495121279	0.183663559768702	-3.47286906517845	0.000514926499277288	0.0057456605933557
AT3TE53850	16.9810735722677	4.12090847268681	1.18717983382025	3.47117458980587	0.000518186966946253	0.0057761833944708
AT1G09794	132.597144716771	1.34501106508554	0.387697592631281	3.4692272808738	0.000521957690057725	0.00580923235479908
AT4G33440	1174.93316728271	-0.729773669634589	0.210364799367803	-3.46908642428645	0.00052223143082764	0.00580923235479908
AT4G02655	791.630652152552	-0.725178805012089	0.209055913342148	-3.46882703970796	0.000522735869046636	0.00580923235479908
AT3G47340	421.650999778234	-0.850040176047957	0.245130034896711	-3.46771123500282	0.000524911013216111	0.00582751863511973
AT1G09940	7488.13676316908	-0.618019281640707	0.178306369442009	-3.4660527471606	0.000528159651984065	0.00585767388218617
AT1G27530	1797.00023472713	0.694966368875704	0.200586005866902	3.46468022967088	0.00053086229172766	0.00588171896635218
AT1G53903	39.3579011928097	2.21727560708523	0.640302710278166	3.46285525813561	0.000534475826123689	0.00591579782596864
AT1G07473	134.054123753878	-1.28537947592796	0.37211058768871	-3.45429428362101	0.000551734963504802	0.00610069152611038
AT4G27880	9802.35879487001	-0.645662940802537	0.187004331150644	-3.45266303100977	0.000555081935022488	0.00613153759951547
AT1G32120	50007.3719324661	-0.72693264736131	0.210747896059792	-3.44929966539296	0.000562042600468431	0.00620219928821833
AT5G16880	5505.86489220843	-0.53074086720174	0.15388198405467	-3.44901237439973	0.000562640917612607	0.0062025805366472
AT2TE18055	41.4548160662744	2.08490012909199	0.604651732384447	3.44810081147073	0.00056454328359967	0.00621732252869226
AT3G46440	724.989567616706	0.881706766040551	0.255729717121465	3.44780722383454	0.00056515725398603	0.0062178601083543
AT4G26650	9130.35563112637	-0.651288604997228	0.188961005551915	-3.44668257397843	0.000567514956306083	0.00623756198729223
AT1G72460	571.107924689761	0.716739201680012	0.20800358227121	3.44580220135572	0.00056936694670878	0.00625167180408183
AT3G56600	32677.7554484304	-0.556362789588079	0.16147978910674	-3.44540200767984	0.000570210670928387	0.00625469372039293
AT5G19770	142.739466782345	1.06939988191048	0.310412325455591	3.44509477947091	0.000570859186843815	0.0062555704916889
AT2G44090	3442.89045590072	-0.565555743425711	0.16436834910609	-3.44078252596356	0.000580034528911527	0.00634979093242251
AT1G29920	17.7796536303174	4.42902990011079	1.28745249981606	3.44015014203907	0.000581391562612426	0.00635832005155259
AT5G54560	1972.98714054209	-0.710989435888145	0.206787546609798	-3.43826041531293	0.000585464364928759	0.00639650341901312
AT2G17990	586.808934877316	-0.730532988671405	0.212598960851838	-3.43620206676607	0.000589930799781418	0.00643724260451932
AT2G44730	1580.14208470502	-0.737428461084369	0.214618076906114	-3.43600348915138	0.000590363369201963	0.00643724260451932
AT3G48050	1314.13466463735	-0.649687619588877	0.189108368626871	-3.43553077162213	0.000591394296700645	0.00644209906168366
AT1G79915	1300.44261666524	-0.717535770895596	0.208900934746859	-3.43481359604775	0.000592961551567867	0.00645278238412431
AT2G23320	1194.02435213068	-0.748512786049325	0.217966250037962	-3.43407654129463	0.000594576276478476	0.00645771171687938
AT5G25360	240.513665598414	1.06009920264556	0.308700432577082	3.43407099820261	0.000594588435666135	0.00645771171687938
AT3G15270	53.5340978921538	-1.82374314514752	0.531751957032764	-3.42968769748251	0.000604276325696866	0.006556457727137
AT5G62910	288.489337666838	-0.843094296386589	0.245861614106123	-3.42914163096105	0.000605493469676427	0.00656319128411827
AT5G11490	121.320424949063	1.21173262458807	0.353404170173613	3.42874455610639	0.000606379953999578	0.00656633095856629
AT4G26270	318.601267865375	0.860107894998539	0.251010868593708	3.42657630650539	0.000611241994579955	0.00661247239367617
AT4G25900	22787.4529363342	0.591052062959039	0.172708065234455	3.42226092427516	0.000621026858807408	0.00671172642495001
AT1G04710	350.82333415459	-0.76793932025058	0.224435193260863	-3.4216528570811	0.000622417270276023	0.00672015192107635
AT5G24105	41010.91127049	-3.33264763618663	0.975344399484336	-3.41689318967597	0.000633401249830183	0.00682559853713349
AT4G28150	367.67880865527	-0.788282423327962	0.230702185538181	-3.41688320589188	0.000633424477950672	0.00682559853713349
AT3G57785	139.256731416339	1.18108006882947	0.345955881013966	3.41396152991482	0.00064025615483162	0.00689246400729695
AT4G00810	316.611758826437	0.962697045132422	0.282097870392967	3.41263492628062	0.000643380686256637	0.00691932972648633
AT1G47280	7265.65337968085	-0.632920475425786	0.185494915988478	-3.41206373259901	0.000644730373870232	0.00692359308870443
AT4G26090	1003.99839752229	-0.61762102277812	0.181017833940274	-3.4119346659617	0.000645035713135979	0.00692359308870443
AT5G24960	190.748185738457	1.04152772184636	0.305407010993994	3.41029408086131	0.000648928663940285	0.00695858982521541
AT1G73010	2728.0507099763	0.69938965674126	0.2054178029102	3.40471783279175	0.000662324520034677	0.0070953207102449
AT5G57990	214.49272197321	-2.99043136743427	0.878716843356393	-3.40317975015917	0.000666064453717236	0.00712844466906326
AT4G01575	5726.72213007628	-0.572049232363091	0.168108748732913	-3.40285224103326	0.000666863341876891	0.0071300587826332
AT3G19760	650.416273779449	-0.664345472628724	0.195318741221301	-3.40134012985474	0.000670563377738969	0.0071626585261011
AT1G16170	991.940830345633	0.683399546517799	0.200991776869816	3.40013684719272	0.000673521358332858	0.00718727641549768
AT4G38600	1302.73401416772	-0.67714431159658	0.19918039779146	-3.39965337505524	0.000674713270705903	0.00719301880262243
AT3G02340	703.326538895462	-0.761657954022496	0.224068644295544	-3.39921704090768	0.00067579065613578	0.0071975302989408
AT1G73250	829.171630537148	-0.71413831875104	0.210209126116254	-3.39727552245325	0.000680604024212616	0.00724178479147698
AT4G29735	108.193943696583	1.35063931794765	0.397812495739408	3.39516564314359	0.000685870911304607	0.00729077465330752
AT5G40160	129.642611381367	1.12463943248377	0.331326057083486	3.3943585433137	0.000687895671889266	0.00730523955803639
AT2G39050	50.9523536572623	-1.64486982604599	0.484780264164093	-3.39302143184859	0.000691262296045061	0.00733391300008463
AT5G60640	86.3311354533902	1.39264155785207	0.410641763590819	3.39137827987647	0.000695420451221876	0.00737092081343264
AT4G20890	69707.2071491505	-0.549509902553478	0.162079908094361	-3.39036410505342	0.000697998508065895	0.00739112568406254
AT5G15140	86515.9578601698	0.565814643021341	0.16690946483649	3.38994941704253	0.000699055211132804	0.00739519753161837
AT1G63000	4061.91305097417	0.622956499095967	0.18383312334181	3.38870649517102	0.000702231322348019	0.0074216609111171
AT3G08770	30.6674609763767	2.52720078556682	0.746144023638611	3.3870147123109	0.000706575986065113	0.0074604117069946
AT1G10770	180523.945029416	-3.34906831521475	0.9888742590183	-3.38674840069103	0.000707262171390439	0.00746049703704469
AT4G33810	76.6965436838939	-1.40598737913321	0.415248795971816	-3.38589152520658	0.000709474222386178	0.00747666225545281
AT3G13404	37.0366107209899	-1.93371658190406	0.571381149495339	-3.384284874662	0.000713639177903391	0.00751335716295991
AT4TE08435	26.6668523690545	-2.41779346390131	0.715276927841642	-3.38022012145286	0.000724277982875162	0.00761079882291551
AT4TE08440	26.6668523690545	-2.41779346390131	0.715276927841642	-3.38022012145286	0.000724277982875162	0.00761079882291551
AT4G30200	2338.74077631838	-0.6012205288105	0.177906300969325	-3.37942234499139	0.000726383248347334	0.00762563788007383
AT1G60780	1174.11848768956	0.608235324470987	0.180010659451334	3.37888504116848	0.00072780435037253	0.00763327308179083
AT3G27380	1299.37808699129	0.620568301571399	0.183962288352205	3.37334519552883	0.000742607903293569	0.00778111633527223
AT4G31350	94.6929308393948	1.35620079390321	0.402580711287421	3.36876744433727	0.000755051056034882	0.00790396928496268
AT4G14500	2236.4706749595	-0.608469413328955	0.180760686824948	-3.36616010935059	0.00076222452484611	0.00797147739767766
AT5G43070	228.024439143501	0.995526094975298	0.295891943374577	3.36449206295231	0.000766846898775202	0.00801220283031793
AT4G07390	97.6935822993472	1.19365530685935	0.355218788827181	3.36033831656376	0.000778470807248244	0.00812593531436924
AT2G05840	61.1229985932552	1.54986444036577	0.461397213658729	3.35906762001411	0.000782059284021483	0.00815565520644963
AT5G25880	407.824144364052	0.918047486262192	0.273644674375737	3.35488892066518	0.000793968587286982	0.00827200984595774
AT3G48780	17909.0111779073	-0.639374613462129	0.190607662457735	-3.35440141921841	0.000795368878044431	0.00827875912605944
AT5TE67430	124.924615463539	1.46549165083451	0.437311747373449	3.35113716847637	0.000804804270359929	0.00836905159026459
AT3G16860	3185.27496776544	-0.836019010432391	0.249740907494533	-3.34754533736405	0.000815306505830182	0.00847025701335568
AT2G42750	70.7297659653379	1.43175133745114	0.42811075954926	3.34434794154338	0.000824762279116026	0.00855563559862264
AT5G08060	960.162511862807	0.722933524544889	0.216172667599595	3.34424112248982	0.000825079928207473	0.00855563559862264
AT3G20560	127.554080567974	1.08036911881133	0.323201660357463	3.34270906163178	0.000829648341168594	0.0085949068263059
AT4G10140	444.554653507905	0.748108635165666	0.224050472630176	3.33901833092991	0.000840750160910665	0.00870172461932186
AT1G09770	472.456696361861	-0.823403582328738	0.246668824771222	-3.33809342584098	0.000843553811803423	0.00872253668934329
AT1G06530	119.5047364887	-1.2978030804628	0.389173056686634	-3.33477114657453	0.000853696260512961	0.00881912324710197
AT1G74790	179.46848754442	-0.999190149762873	0.299706416185248	-3.33389642597866	0.000856385403598019	0.00883860432493941
AT4G32390	31.6632522887356	2.02032890046583	0.606049191661792	3.33360547008745	0.000857281625418066	0.0088395618021083
AT4G27840	1176.58285773606	-0.582497787931829	0.174776081963469	-3.33282324096028	0.000859695414230368	0.00885615069977763
AT3G05280	136.097826995345	1.08461066264811	0.325673132760059	3.33036579792782	0.000867319609955985	0.00892633334774158
AT3G50500	136.362559797299	-1.03870822724358	0.312270470046042	-3.32630948770284	0.000880041560004842	0.00904880116184418
AT2G30800	112.033015027591	-1.17225559786915	0.352559874531922	-3.32498302430333	0.000884239187385364	0.00908347295948998
AT3G21320	604.962193799692	0.663630611663422	0.19968355512924	3.32341144083651	0.000889236523676945	0.00912628753124417
AT5G03905	563.439113578892	0.696140194821084	0.209666779576845	3.32022171669757	0.00089945982874835	0.00921993171000115
AT4G02070	273.43280096169	-0.859444121956448	0.258865385806372	-3.32004265181788	0.000900036962056102	0.00921993171000115
AT5TE52555	163.046687761666	1.00475201434516	0.302778561932037	3.31843842554049	0.000905222780584393	0.00926442886696697
AT1G72750	148.784756734901	1.07047660946652	0.322832329125799	3.31589036440458	0.000913516591402144	0.00933418283317344
AT1G20490	1372.54103375208	-0.575454473432277	0.173547981616803	-3.31582348622694	0.000913735221898545	0.00933418283317344
AT3G02260	185.307894839296	-0.983667363145686	0.296804459498454	-3.31419334065231	0.000919079326246428	0.00938006562835177
AT4G13230	787.028301927228	2.69651475999097	0.813723648480107	3.31379672328264	0.000920383929779322	0.00938467469456172
AT1G34355	230.15584541132	-1.03839302463904	0.313524919443814	-3.31199518839245	0.00092633139125938	0.00943424633295137
AT5G47770	155.426988613015	1.03914881381583	0.313771113257585	3.31180522970182	0.000926960578614837	0.00943424633295137
AT2G33400	191.535718766659	-0.957365160921631	0.289121365127636	-3.31129164563467	0.000928663671529123	0.00944284446780352
AT3G58670	292.420137180602	0.918404118188683	0.277754980843587	3.30652618865498	0.000944605201712219	0.00959607241850216
AT1G09660	24.7924429126914	2.48207554719835	0.751203439777349	3.3041322972829	0.000952708618716437	0.00966946515047808
AT1G79830	6643.55556291812	-0.581171508842193	0.175922683893836	-3.30356208749584	0.000954648273454069	0.00968022147884024
AT1G09320	427.955982700439	-0.770811496569867	0.233419423047563	-3.30225945427344	0.00095909310787758	0.00971433697405314
AT3G20540	881.017429142879	-0.67778989267496	0.205262801685097	-3.30205905361648	0.000959778612142862	0.00971433697405314
AT1G02800	24.1200530132165	-2.43245711151839	0.736720820302392	-3.30173526318962	0.000960887150934433	0.00971661804648955
AT1G10660	12358.5558908982	-0.571083868253983	0.173000937830834	-3.30104492735413	0.000963254566213908	0.009731613165735
AT5G54170	22.0033612625397	2.50333622332989	0.758407236973659	3.30078103331289	0.000964160982218437	0.00973183406088738
AT1G22620	278.248974049868	-0.79737101926991	0.24166500844817	-3.2994889263868	0.000968610489353327	0.00976778423819001
AT3G13920	387.337359197076	0.973217883739758	0.295083444586344	3.29811076017511	0.000973377303980409	0.00980686547471836
AT1TE57440	1803.45851690618	-0.657081721434172	0.199282208207561	-3.29724227438203	0.000976392379804904	0.00982824241776172
AT4G00830	277.494314743953	-0.843337207242223	0.255826236676007	-3.29652352393501	0.000978894165233611	0.00984441828692887
AT3G62830	599.908694754887	0.71201109716055	0.216167416676012	3.29379472683296	0.000988446551979236	0.00993140544737493
AT2G33630	22.9413346938844	-2.42539583784382	0.736436503897549	-3.29342153058349	0.000989759645567568	0.0099355252012175
AT5G11390	819.69909805781	-0.705755795885165	0.214350700471924	-3.29252852606192	0.000992908246954429	0.00995804606471525
AT2TE55600	14.0827558635734	3.33545416439888	1.0138298433394	3.28995460758229	0.0010020354614353	0.0100404318276058
AT4G13520	37.9436766919966	1.94539009353772	0.591468222003261	3.28908641439573	0.00100513158422207	0.010062290891366
AT4G02230	133.276120488876	1.33479465986518	0.406118490909666	3.28671235056392	0.00101364316975424	0.0101382746851237
AT4G15910	26.8783877115421	-2.80330311698976	0.854074993341263	-3.2822681132752	0.00102975642443356	0.0102900819088266
AT3G17790	2394.47305128286	-0.530902464972419	0.161840753272527	-3.28040035798907	0.00103659873509886	0.0103490556112139
AT5G10780	167.691530369443	1.16908239995599	0.35653977411213	3.27896769124086	0.00104187563442581	0.0103923080053968
AT2G18270	2402.8901016814	-0.632684012451196	0.193012674173184	-3.2779402449163	0.00104567529056088	0.0104207604590134
AT3G21290	592.464051689383	-0.780507703770299	0.238153637810342	-3.27732849662313	0.00104794371651181	0.0104339156281113
AT4G30790	556.149635331963	-0.683536861230696	0.208755047164278	-3.27434891043757	0.00105905756950064	0.0105350374137849
AT1G54130	516.849778552699	0.76977851218076	0.235213420204516	3.27268108899333	0.00106532604432989	0.0105797525574729
AT1TE57435	1774.19632282516	-0.664857470386253	0.203156228710943	-3.27264132931032	0.00106547589835303	0.0105797525574729
AT4G33230	12284.1821726239	-0.612542774821279	0.187462680259097	-3.26754516672154	0.00108484554651951	0.0107623721395921
AT1G55530	5287.11996811075	-0.5486757558161	0.167996204894148	-3.2660008966382	0.00109077904040654	0.0108114873896872
AT5G48100	437.485662788721	-2.64917254475847	0.811657844144884	-3.26390308905286	0.00109888745800888	0.010882052036916
AT1TE57430	1777.45264322024	-0.662916810371891	0.203190217864549	-3.26254293803556	0.00110417444326077	0.0109245748424056
AT2G40360	39.8947541894118	1.75994529808771	0.540141251584844	3.25830566157242	0.00112079613448655	0.011071073452111
AT4G39820	107.017610806378	-1.16306607260368	0.356959742934805	-3.25825557538038	0.00112099398524374	0.011071073452111
AT3G52730	786.092329577228	0.651445016980316	0.200035099857741	3.25665354452097	0.00112733939678996	0.01112375609281
AT3G08980	116.683898930244	1.06641716149416	0.327537223760898	3.25586554483543	0.00113047271782449	0.0111446781733916
AT1G67810	4988.9411213029	-0.52369237648619	0.160869213721162	-3.25539215597782	0.00113235892172502	0.0111532791914223
AT1TE57445	1774.77105626792	-0.66484790212372	0.204316123947027	-3.25401583232899	0.00113785938081947	0.0111900494252822
AT3G45100	547.661768013941	-0.691416526273793	0.212485347034083	-3.25394920602637	0.00113812627766686	0.0111900494252822
AT1G72020	121.760980306987	1.18932542000549	0.365617712265633	3.25292068766462	0.00114225374571277	0.0112206033127963
AT5G60480	525.607316898106	0.692857415500826	0.213337884692733	3.24769984711686	0.00116341929412936	0.0114183220999208
AT1G05020	7716.07481239669	-0.529063873769468	0.162943636441029	-3.24691338259743	0.00116663889171202	0.011439715763472
AT3TE60310	575.937476475664	0.78370831233899	0.241403766404311	3.24646265471439	0.00116848777342477	0.0114476424605693
AT2G41110	6352.27938029167	0.683003645450893	0.210403572719313	3.24615992315895	0.00116973109519968	0.0114496276773904
AT4TE21275	30.0685711240475	-2.10547144747214	0.648792209247699	-3.24521690837428	0.00117361190683205	0.0114774028435256
AT3G01250	11008.5971775809	1.59058614530831	0.490406687762777	3.24340223124713	0.00118111338808528	0.0115405057688404
AT1G61100	66.519661645042	-1.46911018019921	0.453357853044133	-3.24050894968438	0.00119316526688752	0.0116479186036349
AT3G19580	411.194041309165	-0.801170014587044	0.247390639123604	-3.23848152632305	0.00120167802983517	0.0117206220605023
AT4G12570	236.035501712783	-0.88823576870902	0.274378634450333	-3.23726288123139	0.00120682184971212	0.0117603666878058
AT2G20320	27268.6982722075	-0.56271105206619	0.173839714476441	-3.236953384104	0.0012081314513065	0.0117627099356408
AT4G35450	142.056632785903	-1.05533644606896	0.326191835602618	-3.23532452649925	0.00121504543662213	0.0118195666611111
AT4G35180	26922.4602817406	-0.555994906492841	0.171977095880234	-3.23295903822006	0.00122515128252643	0.0119073448854733
AT5G27870	93882.7714224942	0.531620709004004	0.164701728121936	3.22777857321826	0.00124755502427919	0.0121143869171401
AT3G14040	312559.108207821	0.651021203203202	0.201765366690606	3.22662513334858	0.00125259447562407	0.0121525964910194
AT5G20590	301.629058059225	0.802657821238289	0.248834749965267	3.22566611516409	0.00125679879008262	0.0121826434259815
AT5TE04420	27.908106499746	2.25420287355549	0.698988734275771	3.22494879104324	0.00125995203657713	0.0122024580162162
AT4G18600	94.1739939448786	-1.23151462690373	0.382183505615316	-3.22231234160928	0.00127160432664308	0.0123044773981769
AT2G03520	605.033518690499	-0.771788712030734	0.239612813279372	-3.2209826405689	0.00127751885923899	0.0123508457727129
AT3G21160	614.990483123178	0.708114877340776	0.219882202056454	3.22042835080836	0.00127999184048703	0.0123638895777334
AT5G02790	81.3125065123274	1.34023664807173	0.416251197465163	3.21977848047847	0.00128289688484298	0.0123810802868794
AT5G66270	60.6327814558484	-1.45124138076459	0.451017838328234	-3.21770284329294	0.00129221618994718	0.0124600898525845
AT1G71410	4740.56490978553	-3.24291268258062	1.00897629787486	-3.21406230196976	0.00130871273734657	0.0126081064240692
AT5G36260	3034.73704860816	0.588563723809408	0.183179852676171	3.21303743403421	0.00131339170134884	0.0126421132967979
AT5G24380	328.108909141486	0.76094294163228	0.236875455882272	3.21241784547941	0.00131622787259343	0.012651407258025
AT1G74010	26148.7909493078	0.591648599106686	0.184180850011801	3.21232418608547	0.00131665709056886	0.012651407258025
AT3G46230	193.824775831513	-1.14507395451319	0.356629276054383	-3.2108243248616	0.00132354820478264	0.0127065247373635
AT5G19860	2312.80279513395	0.64932552448522	0.202283374055985	3.20997970058334	0.00132744346416083	0.0127328099326046
AT5G15460	548.147093939507	0.766882912982806	0.238956349175235	3.20930126204943	0.00133057996156246	0.0127517776455664
AT5G09550	3732.59760068347	0.608858625991421	0.189890028958353	3.20637491779497	0.00134418729111029	0.0128709735220151
AT1G50990	1895.77946672129	0.563016175509164	0.17577214398616	3.20310239575557	0.0013595563156048	0.0130068161602469
AT3G02300	802.16708932882	0.667854844889223	0.208659238812539	3.20069625811887	0.00137095969021274	0.0131045165175678
AT5G41130	24.8733206026298	-2.38584457451068	0.746057934292352	-3.19793472443088	0.00138415607964172	0.0132191711703283
AT2TE13000	631.132860175411	-0.670200671957205	0.209619399395786	-3.19722637260203	0.00138755986809325	0.0132401853154917
AT3G15020	259.897090877475	0.78991720308271	0.247180916079009	3.19570465071916	0.001394898199173	0.0132986741657724
AT5G55290	1837.74196739712	0.603660989798545	0.188937413389074	3.19503151318919	0.00139815573130514	0.0133181899184581
AT2G05850	97647.4101717829	-0.551697808326243	0.172727612021767	-3.19403366878435	0.00140299753419365	0.0133446088384662
AT2G37450	78.5520311043778	1.53721855170674	0.481289214045822	3.19396011139444	0.00140335506508866	0.0133446088384662
AT1G35670	1373.39591004768	0.645353400827254	0.202074585329672	3.19363961467198	0.00140491384273511	0.0133478947303728
AT5G04390	1128.76165567235	0.700667173464312	0.21948198543221	3.19236757442548	0.00141111633180043	0.0133837356909117
AT1G52590	2246.65540731958	0.561625125470511	0.175927494416381	3.19236698808016	0.0014111191966422	0.0133837356909117
AT5G13450	112.894174843943	1.22242969741685	0.383027188491432	3.19149588892486	0.00141538125230968	0.0134125965012154
AT2G40765	339.025058293769	0.915616141283484	0.286964740387057	3.19069213886175	0.00141932431102522	0.0134383873234935
AT2G31432	43.0338648324232	1.80948725744189	0.56718335399681	3.19030388443323	0.00142123264537263	0.0134448852660273
AT1G19680	1304.78465307519	-0.643157373101008	0.20181310725737	-3.18689594467617	0.00143808502021117	0.0135926214711024
AT5G45880	639396.36661481	-0.502732977173255	0.157865161725982	-3.18457202131707	0.00144968232053472	0.0136904763008781
AT1G12920	16.0029868955896	-2.93453899960371	0.921654319647168	-3.18399093569824	0.00145259560934784	0.0136981992799607
AT2G39130	443.129525284453	-0.705546615545097	0.221597376963064	-3.18391230624854	0.00145299023447683	0.0136981992799607
AT4G15130	2556.62215166446	0.542965622074047	0.170688219011848	3.18103748001705	0.00146748642769367	0.0138211803274887
AT1G79530	19.6885566877776	2.48782160481538	0.782130169814506	3.18082807802365	0.00146854751889059	0.0138211803274887
AT2G36500	953.825947379101	0.733166333151962	0.231061615412201	3.17303387602495	0.00150854921475307	0.0141855200518917
AT4G29960	520.928633668997	0.733293903314364	0.231195333772294	3.17175044733641	0.00151523152447346	0.014236188925924
AT1G10630	87.164800258833	1.30867364769827	0.412967054541245	3.16895411705917	0.0015298854465912	0.0143616038254235
AT1G03370	906.977883829079	-0.594293401698387	0.187613917456512	-3.1676402782653	0.00153681547726248	0.0144143596597117
AT2G21930	270.60523182485	-0.957711722890207	0.302516572441969	-3.16581572757943	0.00154648729059711	0.0144927199072823
AT2G15280	238.203572734307	0.865808648187026	0.273587399622335	3.1646510379579	0.00155269050670491	0.0145384688976744
AT2G22805	3200.36619333043	0.676299026199806	0.21395584422037	3.16092803477353	0.00157267348748972	0.0147077099613456
AT5G26090	162.326647253306	1.07510379473893	0.34013808335638	3.16078630222799	0.00157343888606651	0.0147077099613456
AT1G04445	17.2683628512876	-2.75799606769493	0.872834424985484	-3.1598158697061	0.00157868873548502	0.0147442559149458
AT1G16560	189.427910572675	0.918749585352833	0.290870271966154	3.15862318669589	0.00158516300538602	0.0147921657211679
AT5TE52550	79.0889340054498	1.2414013825512	0.393218381295582	3.15702785424478	0.00159386120459455	0.0148607296380925
AT4G08230	157.406298076174	0.95091873992077	0.301399020886545	3.15501602202856	0.00160489291685286	0.0149509160636876
AT2G44735	128.921654957298	-1.31866903241257	0.418270659278687	-3.15266921826798	0.00161785020788247	0.0150588730855524
AT1G53885	36.9468686788501	2.08858208095849	0.662726510491653	3.15149922010672	0.00162434596459856	0.0151065547781178
AT1G57765	50.4508027878315	1.56176469367542	0.495795969281535	3.1500149062095	0.00163262132401016	0.0151706924043579
AT5G25100	44.9165946316248	-1.89219898165402	0.60080061921958	-3.14946243582758	0.00163571135690841	0.0151865791972205
AT3G12760	450.250112204776	0.730284429295009	0.231946610281187	3.14850227131878	0.0016410944799212	0.0152237111872623
AT5G51040	1235.0584391903	0.594255809728058	0.189131113714862	3.14203093322852	0.00167780309039541	0.0155511285598402
AT1G23149	10890.4974393545	-3.21724389329729	1.02440749334641	-3.14058996463176	0.0016860791300334	0.0155998176729731
AT1G23150	10890.4974393545	-3.21724389329729	1.02440749334641	-3.14058996463176	0.0016860791300334	0.0155998176729731
AT1G12090	23.2425888310602	3.14646179597884	1.00193784458115	3.14037623490926	0.00168730985555699	0.0155998176729731
AT1G64790	434.724387512675	0.86008464845269	0.274168905337705	3.13706124840558	0.00170650474103153	0.015754808558879
AT2G24790	27.3302538089771	2.12179352428974	0.67637948290927	3.13698682160404	0.00170693799329065	0.015754808558879
AT2G24030	204.147880068014	0.946912565113797	0.302057775200676	3.13487234183826	0.00171928911900543	0.01584068639285
AT1G61200	28.0455662811229	-1.98470871737131	0.633128007038152	-3.13476689596471	0.00171990719701788	0.01584068639285
AT4TE48230	693.007696471493	0.636371775104148	0.203011725633034	3.13465526742263	0.00172056173781637	0.01584068639285
AT5G28740	44.4166840863807	-1.64653796698425	0.525582176996683	-3.13278881790286	0.00173153977063793	0.0159284285589954
AT5G66840	254.377314472621	-0.851753861698428	0.272216442379234	-3.12895817112995	0.00175427279188616	0.0161126335051542
AT1G65440	804.423017669629	-0.659437694420933	0.210755606515881	-3.12892124353163	0.00175449326842163	0.0161126335051542
AT5G34850	2387.24813148551	-0.588781495320969	0.188199023673393	-3.12850451521343	0.00175698311492796	0.0161220418936092
AT2TE27870	195.155366497553	-0.989524221257722	0.316754759406596	-3.1239442877243	0.00178444240465637	0.0163603627800245
AT5G64010	23.7153739648899	-2.23618065779386	0.716070631482982	-3.12284928256691	0.00179109441887112	0.0164076775990175
AT3G01311	201.487588348902	1.01498432837136	0.325068748774665	3.12236821348502	0.00179402405115948	0.0164208424383166
AT5G40830	23.4532729643094	-2.56626305244227	0.823790927927788	-3.1151873193088	0.0018382813016286	0.0168119458690921
AT3G13405	29.8047142933423	-1.95872074258101	0.628957483257374	-3.11423394223212	0.00184423199841045	0.0168523591748436
AT1TE74430	34.3457821205006	-1.81294353559449	0.582825863894338	-3.11060927097628	0.00186701804027212	0.0170385310587375
AT3G42050	1583.68857665574	0.568170079413577	0.182661921710026	3.11050094127195	0.00186770300462074	0.0170385310587375
AT3G56950	1465.26721095866	0.654267752793448	0.21054594972694	3.10748201825767	0.00188688464049629	0.017191183845756
AT4G33400	140.550191832724	-0.967438923166276	0.311336289709223	-3.10737602760613	0.00188756136026843	0.017191183845756
AT3G05930	514154.172840444	0.561356333118955	0.180692633485304	3.10669185727824	0.00189193495717103	0.0172167095908355
AT2G01090	287.417103641755	0.800982025989969	0.257844951418151	3.10644835814917	0.00189349378339492	0.0172167095908355
AT4G15802	499.724893275133	0.857328930296751	0.276053662649022	3.10566040700126	0.00189854615647725	0.0172483937353945
AT5G64350	32.5688280710095	2.0374548272264	0.657542033544965	3.09859252075795	0.00194442247445893	0.017650607313529
AT3G63070	988.129672759237	-0.629142266012092	0.203399865176434	-3.09313020176468	0.00198057219572063	0.0179639367661322
AT5G66680	16.3939098209662	3.19516922567782	1.03317793542847	3.09256432615622	0.0019843522219309	0.0179833963308763
AT1G13890	4913.34049654441	0.593246645511107	0.19204301158186	3.08913425500115	0.00200740703267506	0.0181773598135729
AT4G21110	353.278918834224	0.721177325641199	0.233523095759274	3.0882483948595	0.00201340104461407	0.0182161130671768
AT1G71880	96.7410275254901	-1.10423771697266	0.357609685375548	-3.08782944682561	0.0020162414972251	0.0182161130671768
AT3G01820	1579.73912049026	0.590478298235097	0.191231391015733	3.08776867175807	0.0020166538552828	0.0182161130671768
AT4G10810	2516.33536283962	0.613481133731458	0.198740844089597	3.08683973111681	0.00202296634508726	0.0182581425173503
AT5G09350	68.1894539159777	-1.29819290966189	0.420782636146304	-3.08518650282544	0.00203424550011699	0.0183448926166288
AT3TE08235	73.3591440298576	-1.26208506310027	0.409482722960554	-3.0821448435612	0.00205514809673913	0.0185182140543193
AT3G47940	709.672439762131	-0.646614605587423	0.209908147198899	-3.0804645470703	0.00206677958439202	0.0186077814954836
AT1TE46835	22.6108782894363	2.31805201486774	0.752920680286885	3.07874664032936	0.00207873382647962	0.0186849141238219
AT5G65160	2789.10887033046	-0.489975829848384	0.159148145851676	-3.07874042280729	0.00207877720673993	0.0186849141238219
AT1G21480	17.3646548149772	2.59083062861387	0.841588108530398	3.07850194454154	0.00208044171984019	0.0186849141238219
AT1G09920	255.670798936322	0.792493295002422	0.257531477266225	3.0772676933126	0.00208907600978864	0.0187471568186743
AT5G11640	23.4300602826479	2.22823331195354	0.724553733808546	3.07531823794633	0.00210278053513521	0.0188547607559557
AT1G02660	4162.80365230322	0.546396907963207	0.177707145614479	3.07470420547167	0.00210711418274046	0.0188782330932496
AT1G15350	20003.6758107754	-0.510275561513356	0.165984006574145	-3.07424535679837	0.00211035793770845	0.0188919105212924
AT3G57480	4661.42711887999	-0.506533262437471	0.164817990909691	-3.07328866006512	0.00211713588032181	0.0189371780124395
AT4G19490	87.8111804507959	-1.23090202589235	0.401011295487776	-3.06949464950887	0.00214421246417164	0.0191637900331571
AT2G41490	360.44499838731	0.760906100176661	0.248066639698737	3.06734553707318	0.00215969046241946	0.019286456548327
AT1G63060	2092.42419244194	1.48451687680673	0.484151271144868	3.06622530040313	0.00216779900332606	0.0193431667758259
AT5G61920	66.8382665886045	-1.39356026369392	0.45460775113457	-3.06541245769785	0.00217370001493524	0.0193801033746495
AT1G66300	213.702262361058	0.825751565558291	0.269444332410521	3.06464625984484	0.00217927587623012	0.0194140835548857
AT3TE70260	27.3147860508146	2.00985078433491	0.656577220780202	3.06110343265736	0.00220522900565116	0.0196293928156748
AT2G23380	312.725749171236	-0.767036930921879	0.250607533549553	-3.0607097881605	0.00220813008330378	0.0196393267392952
AT1G12360	10370.7567748532	-0.482325091126714	0.157646606787344	-3.05953360466135	0.00221681916173274	0.0197006820818931
AT2G39720	475.372497424302	-0.793875270824695	0.259579846707381	-3.05830857400734	0.00222590240394647	0.0197654384569968
AT5G39510	1325.97431230493	0.620885223525995	0.203202308744857	3.05550280093317	0.0022468350421881	0.0199352251081883
AT2G29530	17.8486660535031	2.6882461148726	0.880084782609844	3.05453084519965	0.00225412833652876	0.0199838194669536
AT1G74050	80.0003916097562	1.23759264843807	0.405684796456633	3.05062614928526	0.00228364725551114	0.0202292166708
AT5G14030	1134.87399044947	0.759674167372302	0.249057038700482	3.05020155758735	0.002286878361104	0.0202415412138908
AT4G22220	3541.40882008116	0.553532557227423	0.18156978224524	3.04859404677694	0.00229914935483346	0.0203337951783583
AT2TE04635	77.8639997459953	1.23882821167557	0.406441589046378	3.04798584855009	0.00230380776317633	0.020358628924069
AT5G56160	8114.70692014845	-0.496136417940522	0.162895547292756	-3.04573345426603	0.00232113505094199	0.0204952871833577
AT4G25590	15964.1171251735	0.618465893940784	0.203114265621886	3.04491608232044	0.00232745241255383	0.020534588165932
AT3G13403	31.4791382814738	-1.86933851843098	0.61426271285416	-3.04322316707966	0.00234058684234566	0.0206339234290761
AT5G05510	1837.13208742392	-0.711191966170995	0.233785935859616	-3.04206479981777	0.00234961307126919	0.0206935160149312
AT5G39590	454.315429810427	-0.718008964269615	0.236041707295598	-3.04187328797128	0.00235110843652645	0.0206935160149312
AT5G38270	15.7096908553247	3.48992410174522	1.14757532598486	3.04112856273738	0.00235693169648551	0.020728187469811
AT3G14180	85.7969764773321	1.2227951776596	0.4022043123434	3.04023388146963	0.0023639449751527	0.0207732608759026
AT3G01900	37.2630363046326	-1.6897162477937	0.555945665558247	-3.03935501699971	0.00237085286672984	0.0208038411072508
AT1G31340	132.275269273177	0.971552094882255	0.319662053884391	3.03931005596813	0.00237120675772519	0.0208038411072508
AT1G03990	400.013090431882	-0.680554221795591	0.224066340114827	-3.03728896293315	0.00238716494241371	0.0209271623079168
AT4G28080	781.91161345313	-0.669263584234013	0.220393282673589	-3.0366786869145	0.00239200286176863	0.020952878571002
AT4G20410	405.532539296798	0.76871539832994	0.253243013192273	3.03548512016124	0.00240149072898778	0.021019252983551
AT4TE33685	16.4005297454257	2.80524197600297	0.924585480799579	3.03405367514208	0.00241291495758623	0.0211024565686516
AT3G28345	31.3953750227342	2.03998280902615	0.672675434796604	3.0326405625961	0.00242424164872147	0.0211846756308448
AT3G22200	142.75410271227	0.93905491132936	0.309733105826104	3.03181963330901	0.00243084406820003	0.021225513046299
AT3G28970	796.388467480736	-0.632882720349146	0.208798382764437	-3.03107098805049	0.00243687947798697	0.0212613386334755
AT5G54760	1017.14899620992	0.650882920009153	0.214772782602625	3.03056519602591	0.00244096481876771	0.0212801069224107
AT3G07660	1210.2293213191	-0.63674400640097	0.210181952824203	-3.02948943924575	0.00244967468073787	0.0213391297208852
AT5G05850	109.478984185198	-1.0571604186988	0.348991240291039	-3.02918897854626	0.0024521124359444	0.0213434659970414
AT2G01670	1483.11167899332	0.614094503403377	0.202816319097297	3.02783575866386	0.00246311917599631	0.021422321876926
AT5G47310	485.403260161187	0.64825866393142	0.214453090426308	3.02284598763654	0.00250409649452491	0.021761508398707
AT3G19310	38316.8547754416	-0.487159614393818	0.161275119619963	-3.02067433303901	0.00252212470275542	0.0219008808048265
AT5G59160	1446.95220175748	0.573659704129458	0.190002777664845	3.01921746186976	0.00253428552063421	0.0219891240520644
AT4G39200	48.8838023749623	1.69017210222778	0.559864361382872	3.01889568046989	0.00253697871995376	0.0219951456871011
AT2G19010	2397.03879444958	1.58486279780828	0.525207609332468	3.01759298541508	0.00254790859981751	0.0220581876835757
AT3G01085	65815.1816289432	-0.659494022608752	0.218567467887473	-3.01734759057686	0.00254997232707484	0.0220581876835757
AT1G56660	54.2600487593577	1.47233217556485	0.487961397118074	3.0173128125719	0.00255026492760482	0.0220581876835757
AT3G17800	1222.97225409671	-0.527493420373683	0.174884497372275	-3.01623887937198	0.00255931546249533	0.0221024692735447
AT2G06983	15.5877597333176	2.75642416392468	0.91386448240881	3.01622857325537	0.00255940245905254	0.0221024692735447
AT1G55535	1111.40655648	0.563283855110414	0.186784249771739	3.01569246763996	0.00256393159417551	0.0221141074479723
AT3G20220	29374.9195667325	-0.478472748819729	0.15867031294254	-3.01551525264213	0.00256543035553972	0.0221141074479723
AT3G20210	29375.537793624	-0.478425323141837	0.158662978952477	-3.01535573263839	0.00256678015006914	0.0221141074479723
AT4G21070	828.373163313299	-0.818392972476808	0.271488224445622	-3.01446950101782	0.00257429092170093	0.0221614622226554
AT2G46915	337.927085700287	-0.683896714335716	0.227146610132611	-3.01081629145356	0.00260546434520374	0.0224122898560841
AT5G26940	74.0021303216715	1.23253609824746	0.409537360097138	3.00958158726988	0.00261607806012325	0.0224860084511531
AT4G33140	1964.77882425001	0.522112508536782	0.173578764636119	3.00792847345879	0.00263035038151452	0.0225910342680896
AT4G32760	3974.86308992176	-0.579993189842322	0.192890886495295	-3.0068459966172	0.00263973457862012	0.0226539468283764
AT3G18950	2307.1913406243	-0.519751095323845	0.172891123788371	-3.00623354128955	0.00264505761605682	0.0226819360030063
AT1G35540	229.281602103424	0.829080774741239	0.275867449130748	3.0053591946192	0.00265267383424311	0.0227295307821984
AT3G51870	308.763935195675	0.819610422711446	0.273046998090443	3.00171922212439	0.00268459663755127	0.0229851612500693
AT5G17780	680.992212939981	-0.628956805580646	0.209658706929045	-2.99990787310114	0.0027006127610144	0.0231043091731574
AT5G02240	42.6460488201972	1.60744355804856	0.536044516132147	2.99871281147905	0.00271122736606907	0.0231770967222159
AT1G05790	2451.17357656324	-0.497943032514877	0.166089934062542	-2.99803257389081	0.0027172862858542	0.0232108569231117
AT5G03460	724.543617935781	0.641952111867775	0.214150131056308	2.9976732150539	0.00272049210979409	0.0232202127167995
AT5G01100	5169.40125194921	0.467425498453407	0.15605598865502	2.99524230042018	0.00274226910012458	0.0233706202819884
AT5G47570	98.1595739197551	1.28746381689082	0.42983777158608	2.99523192701317	0.00274236236902808	0.0233706202819884
AT2G32090	176.636493053011	0.927290863429963	0.309764575276078	2.99353424323461	0.0027576656108785	0.0234828460146171
AT2G23340	1753.8515423529	0.558849514244108	0.186720327129465	2.99297630223529	0.00276271200224786	0.0235076237035816
AT5G61990	46.7397374450048	-1.72191693842497	0.57591033642712	-2.98990455546872	0.0027906463074548	0.0237269634270616
AT5G20500	62.6156350143203	1.35695224787618	0.453959783593905	2.9891463889895	0.00279758061052398	0.0237675535729613
AT4G09720	923.71174967421	0.560887143287411	0.18766708614171	2.98873475801653	0.00280135203614463	0.0237755517662399
AT1G13195	23.4038029270179	-2.12028844735284	0.709465394519377	-2.98857204837907	0.00280284408660363	0.0237755517662399
AT1G08135	1596.80456453506	-0.506943578361314	0.169698109719818	-2.98732601794039	0.00281429429094222	0.0238486823476518
AT2G33470	524.94157205321	0.722436405131607	0.241847043533637	2.98716244191394	0.00281580061530628	0.0238486823476518
AT3G59640	523.837218232796	0.652658758253873	0.218521807310021	2.98669851896261	0.0028200767536928	0.0238665264954833
AT5G46200	840.115113849708	1.46466464787996	0.490600440646352	2.98545318457175	0.00283158477183922	0.0239455001228094
AT3G54650	85.0031080224363	-1.41630482604826	0.475073751335959	-2.98123148682801	0.00287091688851387	0.0242594682084712
AT2G26140	696.278153653318	-0.572689979114536	0.192143591029326	-2.98053125814188	0.00287748869599666	0.0242857847035337
AT1G01355	34.2206172159917	-1.84726845542491	0.61979943919824	-2.98042937537101	0.00287844603284929	0.0242857847035337
AT1G32230	642.537432782658	0.721008909347112	0.242020837953134	2.97911913471985	0.00289078358964104	0.0243711885465369
AT4G24026	3041.41303076731	0.625320416202558	0.210017962152596	2.97746159325271	0.00290646057195342	0.0244845935778189
AT3G56930	178.730931288359	-0.957641386296404	0.322041383130863	-2.9736594004978	0.0029427151789593	0.0247710423863123
AT1G04170	143.834608112052	-0.927619405914036	0.311985661562978	-2.97327576295292	0.00294639606015527	0.024783065331673
AT5G66280	238.954312217825	0.761455531843885	0.25624344311145	2.97160981993478	0.00296242904412837	0.0248988879629491
AT2G02870	328.626236760272	-0.738415516783174	0.248714270817645	-2.96893103220673	0.00298837659989708	0.0250978010321127
AT4TE18365	16.0264866540034	2.55426669247921	0.860575828369806	2.96809021154798	0.00299656369880157	0.0251473637026811
AT2G07360	534.33534935748	-0.600063837712144	0.202192402719587	-2.96778627505778	0.00299952817019717	0.025153055585754
AT1G08040	434.881336782722	0.675759240340695	0.227825077679407	2.96613194308493	0.00301571080795606	0.0252694975697887
AT2G39960	42.7136638827771	1.52904675315728	0.515720275008878	2.96487616883195	0.00302804789092809	0.0253535638477861
AT5G60860	1955.43553052259	0.609281432810997	0.205584332651079	2.96365693316271	0.00304007003727446	0.0254345342002499
AT5G17580	117.768417798916	1.07711125964444	0.363468125074042	2.96342701144709	0.00304234202940637	0.0254345342002499
AT1G60760	1961.39342943983	0.557681180046428	0.188347632078969	2.96091420895915	0.00306727365917266	0.0256234964299299
AT5TE56895	428.532147092082	-0.702561850943469	0.237333469246823	-2.96023082278723	0.00307408626090331	0.0256609234009546
AT1G19640	2996.46822942301	0.6554189421199	0.221485624571023	2.95919404877551	0.00308444809650809	0.0257278983758772
AT5G01680	118.065703136326	-1.00748347054563	0.340634975344824	-2.95766302190713	0.00309980789563894	0.0258351856516183
AT4G35360	1274.96000639314	0.600867821890512	0.203171299900466	2.95744439389264	0.00310200693017523	0.0258351856516183
AT2G44770	143.187062058974	-1.01973156951275	0.344923533259107	-2.95639894407185	0.00311254209448863	0.0259033193067805
AT5G50030	372392.775972004	-0.50723090663824	0.171692052730683	-2.95430626270096	0.00313372844284277	0.0260481870931581
AT5G17040	22.5531056620268	-2.53031388947803	0.856510562656863	-2.95421212510105	0.00313468457656256	0.0260481870931581
AT1G26320	471.758804277411	0.783478328801436	0.265257395995061	2.95365309556166	0.00314036799068357	0.0260757197233967
AT4G35950	1731.01461552666	0.558506726301486	0.189270185697224	2.9508436537117	0.00316907286843396	0.0262538062671641
AT2G31820	240.439676768063	-0.98163267539322	0.332685135987234	-2.95063580908192	0.00317120594856984	0.0262538062671641
AT5G64550	304.081474661268	-0.744522186159378	0.252327306263336	-2.95062075200999	0.00317136052800046	0.0262538062671641
AT5G64552	304.081474661268	-0.744522186159378	0.252327306263336	-2.95062075200999	0.00317136052800046	0.0262538062671641
AT2G28480	39.4965992958302	-1.75220364067147	0.594245106602223	-2.94862106764366	0.00319195088387475	0.0263880216167298
AT3TE39825	40320.5408344939	-0.484373943277163	0.164276949713844	-2.94852043528261	0.00319299028821451	0.0263880216167298
AT1G05960	18359.4992709719	-0.574586102585614	0.194884063481557	-2.948348327312	0.00319476865965135	0.0263880216167298
AT2G16430	211.584840755451	-0.788283918219324	0.267483738837086	-2.94703491751115	0.00320836972583494	0.0264804829134554
AT4G35650	272.659394239465	0.742298022105584	0.251941726161383	2.94630839208468	0.0032159159352783	0.0265228689054961
AT3G48560	14200.2289654885	-0.580144764603021	0.196932575214994	-2.94590554137459	0.0032201071961658	0.026537542600911
AT3G17060	95506.7307133999	0.494482723864994	0.167871020307315	2.945610999205	0.00322317476385801	0.0265429406826092
AT4G10640	45.5158783172104	1.5974069147295	0.542624871517157	2.94385126554044	0.00324155740247616	0.0266686484237717
AT4G38940	1901.88766094305	-0.581529281946063	0.197551390840708	-2.94368609338199	0.00324328772868629	0.0266686484237717
AT1G29930	60.2527993348005	1.42187727208554	0.483104611858535	2.94320782121181	0.00324830280525539	0.0266899383595368
AT2TE13105	16.6171784788518	2.65343909522949	0.902208391959664	2.94104900694398	0.00327102778460785	0.0268402070129199
AT5G08430	146.498987435225	-0.955341382341222	0.324834776685238	-2.94100709317506	0.00327147042395251	0.0268402070129199
AT2G21880	1455.26031970953	-0.509871017613671	0.173426751732808	-2.93997905466862	0.00328234434250006	0.0269093535441026
AT1TE60705	16648.4643764096	-0.545150527557988	0.185575279667803	-2.93762471237472	0.00330737118233769	0.0270943393507664
AT3G13845	34.1097008427942	1.82135384590144	0.62020204127356	2.93671049866486	0.00331713610362749	0.0271541156340101
AT4G10040	830.254351921559	0.708362309609835	0.241327011464525	2.93527983175627	0.00333247008662506	0.0272593575413003
AT3G43610	21.4099864739134	-2.4768219509841	0.844029617159224	-2.93452018819009	0.00334063820952732	0.0273058704169536
AT1G45050	1176.76879729495	0.563581347114995	0.192204874856022	2.93219070295259	0.00336579998195972	0.0274911146262219
AT5G65690	1075.39772180811	0.771781409176075	0.263373741833242	2.9303658132508	0.00338563181576318	0.0276143122695938
AT1G60550	17.0362533523994	-2.40804313584133	0.821762113243633	-2.93034090648981	0.00338590322229431	0.0276143122695938
AT1G52280	1507.29794241265	0.661459561808389	0.225898334224537	2.92812943521273	0.00341008052185438	0.0277908932603273
AT4G38190	28163.4277837584	-0.489861444677774	0.167367080998284	-2.9268685440167	0.00342393568606186	0.0278831535292765
AT2G15910	3701.34506994996	0.482854223444118	0.165063364676723	2.92526584799594	0.00344162069524762	0.0280064429653212
AT3G21920	29.7985705443944	1.93616871341191	0.662092761039671	2.92431639091112	0.00345213669324528	0.0280712549143271
AT3G46460	105.828639525933	1.13890164146285	0.389531265378721	2.92377465607429	0.00345814993669652	0.0280993837544573
AT5G66930	64.8204912752915	1.25929606799986	0.430814880430315	2.92305610879093	0.00346614050250921	0.028143526058012
AT3TE53865	16.4412686533622	2.88362902256813	0.986842132288495	2.92207732951264	0.00347705199941381	0.0281957624784175
AT3G51160	493.688851488473	-0.6363107402718	0.217764041513648	-2.92201933730147	0.00347769948038652	0.0281957624784175
AT1G62760	29.7172442991162	2.01649943344415	0.691149820419733	2.91760103796241	0.00352735348968969	0.0285768845115653
AT1G62960	2486.44979762772	-0.493353959591719	0.169108815472036	-2.91737576314169	0.00352990238604047	0.0285768845115653
AT1G04850	175.755624109017	0.895814443982527	0.307148516135593	2.91655143008102	0.00353924368386583	0.0286314404484499
AT4G24030	2738.54172126003	0.613218526755556	0.210359279885412	2.91510090303405	0.00355573560179281	0.0287437201255875
AT2G16130	63.6971117816934	1.4968671846888	0.513616116081192	2.9143695803583	0.00356407693306875	0.028789995901338
AT4G00110	4649.18450665791	-0.646755286031707	0.222092338367796	-2.91210084411218	0.0035900671134182	0.0289786635229839
AT5G64690	2610.29223993703	-0.501549985373394	0.172247209821709	-2.9118032500645	0.00359348904990276	0.0289850194479694
AT5G54240	7045.61905807003	0.449655825233697	0.15445958885731	2.91115513488184	0.00360095178263911	0.0290239351740626
AT5TE50560	195.381478812584	0.795709043117577	0.273414271362802	2.91026887203604	0.00361117948831457	0.0290850634922672
AT1TE68335	3502.16198725438	-0.664326513966155	0.228334408989336	-2.90944547914012	0.00362070532681522	0.0291404535520271
AT5TE29680	99.0235245985179	1.11114989200122	0.382097446463659	2.90802752618474	0.00363716321325587	0.0292515129183049
AT3G48060	1040.96913870667	-0.554727929965757	0.190798127760696	-2.90740761702606	0.00364437971980011	0.0292881414735141
AT2G26420	1026.97233081759	0.666561708616028	0.229295338896639	2.90700069100183	0.00364912391644666	0.0293048622837563
AT2G44410	2294.2232097013	-0.4846717587192	0.166806428245161	-2.90559400988349	0.00366556717384733	0.0294087105187661
AT4G15650	3521.86899534875	0.525366278606148	0.180821748236123	2.90543744727048	0.00366740145716662	0.0294087105187661
AT5G58460	141.474298425866	0.896895952024787	0.308795785685124	2.90449544197907	0.00367845559466331	0.0294758692297784
AT4G39170	162.670679723011	0.870472134461769	0.299758049395225	2.90391579548233	0.00368527261204984	0.0295090023855694
AT2G46540	256.909285814869	0.90613744026875	0.312079708137773	2.90354488497766	0.00368964078377392	0.0295224930204223
AT3G08505	3077.65836830562	0.630645583583601	0.217317609159509	2.90195344050888	0.00370843652725913	0.02965132170996
AT5TE93075	489.238201719168	-0.620434848140751	0.213905144872875	-2.90051391007673	0.00372551302503458	0.0297662267984244
AT4G15140	193.669800314213	0.836978954959316	0.288587191085342	2.9002637012805	0.00372848842005109	0.029768381420466
AT5G28646	1297.04754872116	0.596551406280241	0.205713615690163	2.89991211461054	0.00373267301536965	0.0297801802139934
AT2G46900	2446.46034375216	-0.468192609132745	0.161559833789633	-2.89795178758589	0.00375608324737374	0.0299452375997144
AT1G77980	2499.05916707692	0.554996469667883	0.191565920595461	2.89715659206366	0.00376561746063526	0.0299958742463639
AT3G62310	465.865327585691	-0.661786703027827	0.228441187534965	-2.89696753098228	0.00376788749395337	0.0299958742463639
AT3G05140	10746.0880861547	-0.466580365270441	0.161119884825222	-2.89585835898886	0.00378123025663021	0.0300803291998883
AT1G24560	924.290020025969	-0.52696260880254	0.182010179138307	-2.89523702079381	0.00378872338276647	0.0300967386771133
AT3G07890	1904.34112156096	-0.501758044341163	0.173304854115395	-2.89523364421788	0.00378876413995655	0.0300967386771133
AT1G26630	3181.86271392949	0.514150171526233	0.177755114088777	2.89246345547869	0.00382233646352809	0.0303415193158269
AT2TE41445	370.478587012703	0.75495278102034	0.261144470959361	2.8909391734272	0.00384092453221296	0.0304670884667678
AT1G09690	32.0436219391652	1.80100966283468	0.623097240738816	2.89041508304417	0.00384733457379414	0.0304959473925671
AT5TE40930	73.9926314612811	1.43644016301951	0.497033852867987	2.89002480360433	0.00385211431320566	0.0305118514570833
AT3G16240	16.0735887843684	2.60922826774526	0.903085483983578	2.88923730258154	0.00386177524106459	0.0305663677713616
AT1G69750	232.412035252528	-0.772131744415324	0.267294991962772	-2.88868765832643	0.00386853122008184	0.0305978292475488
AT3G18215	29.7744200585021	-2.02492437118386	0.701096866998958	-2.88822339179968	0.00387424613752553	0.0306210172450114
AT1G78690	75.3933193961284	-1.22029562599935	0.422645987489913	-2.88727602324267	0.00388593162793657	0.0306913279042054
AT1G10865	229.389501976751	0.854863736057633	0.296185620221067	2.88624321268393	0.00389870748841472	0.0307701433196117
AT2G39240	132.467910310307	14.1016667848251	4.89350287827985	2.88171216725269	0.0039552085383031	0.0311936948662442
AT1G61290	11482.5728545169	0.477520202113979	0.165780612486778	2.88043453906326	0.00397127410025386	0.031297963933376
AT2G42010	581.192479770632	0.616187652010559	0.213947165433373	2.88009261895293	0.00397558362079627	0.0313094996392273
AT1G07930	309.970477369999	0.697886390458389	0.242413849980494	2.8789047759216	0.00399058807440732	0.0314051859761297
AT1G63290	13.5535235734851	3.1163197938239	1.0825714042661	2.87862748040765	0.00399409817689309	0.0314103417742514
AT4TE74250	145.74392911264	-0.922318136156603	0.320500302359767	-2.87774497985117	0.00400528783888322	0.0314758405738522
AT3G11960	129.462273365126	-1.04460073327274	0.36324618881291	-2.87573762765825	0.00403084612107105	0.0316540821013731
AT1G06840	135.427650459093	-0.951432535936237	0.330888685685382	-2.8753855211625	0.00403534449136992	0.0316668046319913
AT3G04120	80.9446771652535	1.20128708113968	0.417925415621027	2.87440542316528	0.00404788983428224	0.0317426115158754
AT3G24180	917.048856854443	-0.642318663276107	0.223540002101987	-2.87339472683309	0.00406086390682141	0.0318216700162744
AT1G03060	1990.95232838503	-0.481678271933215	0.167672503519569	-2.87273262951548	0.00406938354507141	0.0318657350625449
AT3G20230	3415.19354352265	-0.529641605717173	0.184389839720824	-2.87240124791625	0.00407365373732689	0.0318764853613587
AT4G23460	110.148446611887	0.965464373723643	0.336323643680863	2.87064080050159	0.00409640717761381	0.0320317496575033
AT5G05360	1386.99011765724	0.542679035842326	0.189096631957061	2.86985035230852	0.00410666103657696	0.0320596202337451
AT1G17730	262.817330569935	0.763508596174389	0.266055186312307	2.86973769148085	0.00410812439131723	0.0320596202337451
AT4G25370	141.084392879784	0.909934843649228	0.317084457281027	2.86969235720932	0.00410871337298497	0.0320596202337451
AT2TE13875	68.2969745271144	1.20533317990291	0.420138610743924	2.8688940960905	0.00411909692263728	0.0321178627518464
AT1G78200	24.9130727592514	1.96405810089389	0.68487378506355	2.86776650490665	0.00413380487926526	0.0322097176215838
AT1G48140	147.264536786098	1.18846266904058	0.414943789764321	2.8641534066954	0.00418125458154108	0.0325563785605909
AT2G18290	964.634765970733	-0.565769018201094	0.19761036292267	-2.86305338360465	0.00419579865019977	0.0326465182103945
AT2G31350	5107.21163764945	-0.514569232787917	0.179816588387236	-2.86163383146715	0.00421463522583379	0.0327631085187341
AT4G25780	48719.7943009394	-0.460050599917983	0.160773899915494	-2.86147565095948	0.00421673892587961	0.0327631085187341
AT5G50470	17.6050249554127	-2.90766085893327	1.01801063850329	-2.85621853933493	0.00428719930720206	0.0332870619462506
AT5G48655	831.519637610432	-0.540503224953068	0.189277441664437	-2.85561353851827	0.00429537618469923	0.0333270301721163
AT4G33650	47.7945396754941	-1.82470997994887	0.639400060827319	-2.8537844954032	0.00432018265767817	0.0334958770963885
AT2G29980	828.546444028147	-0.538966096687523	0.18888825159209	-2.85335955065875	0.00432596455105675	0.0335170859089622
AT2G02510	126.195275635557	1.11641609694611	0.391801083134981	2.84944617307627	0.00437954156699287	0.0339020706924132
AT5G57320	9770.44815210253	0.535390719788387	0.187903799154772	2.84928097354434	0.00438181644470201	0.0339020706924132
AT3G10290	248.832351120681	0.767170938239737	0.26931454458265	2.84860566824789	0.00439112686876451	0.0339502303655286
AT1G51410	1629.48950952636	0.523743046274166	0.184091497183135	2.84501486645603	0.00444093503303935	0.0343112129448729
AT4G32890	35.1104735180424	1.73544267236213	0.61012079329944	2.84442472936731	0.00444916966153393	0.0343287044819119
AT5TE33550	64.5148588553092	1.35353545880999	0.475858839436684	2.84440541319415	0.00444943942839542	0.0343287044819119
AT1G80230	360.231242984767	0.666171396747471	0.23437645500372	2.84231364766097	0.00447874058443196	0.0345305563489281
AT3G11800	133.204411617608	0.905647122190261	0.318704683393457	2.84164987017838	0.00448807516266741	0.0345782933751168
AT1G51980	1118.31596253651	0.539066808919084	0.190030341869905	2.83674072053257	0.00455766070305418	0.0350898411861456
AT1G72850	60.2158806238352	-1.29357329161521	0.456095377637211	-2.83619031246606	0.00456552316958643	0.0350969790360075
AT5G03000	258.257237208699	0.752137872501285	0.265221306326227	2.83588782107928	0.00456984942636874	0.0350969790360075
AT4G13615	924.237252620356	0.675759231325649	0.238294553652505	2.83581483910489	0.00457089377643962	0.0350969790360075
AT3G58040	2947.0145985144	-0.478789232729833	0.168845958044302	-2.8356570585137	0.00457315230805311	0.0350969790360075
AT3TE57060	161.786914986663	1.16866450226002	0.412145884867001	2.83556028379889	0.00457453807831619	0.0350969790360075
AT3G05500	2021.90044950497	0.525985891276313	0.185594307496797	2.83406263031743	0.00459603234261903	0.0352373155634108
AT3G18410	76.0233351905274	1.21329939062758	0.428371389007427	2.83235393810706	0.00462066710324147	0.0354015177366731
AT4G38510	932.01868127933	0.540195235451363	0.190815925859677	2.83097562751976	0.00464062570662905	0.0355296896481092
AT3G57710	193.252268107221	-0.874545159039428	0.30901682043461	-2.83008917705335	0.00465350315103418	0.0356035060275925
AT1TE46830	23.7673532885012	2.06018491527782	0.72841658031763	2.82830590481544	0.00467950676440469	0.0357775770826827
AT5G04460	4137.51697720561	-0.451643755782902	0.159818571687886	-2.82597792617575	0.00471365121782358	0.0360136046517326
AT4G08280	52.4694092186779	1.43668157405148	0.508508330631189	2.82528620970317	0.00472383999303508	0.0360664036109451
AT4G10890	55.7355185057389	1.3963079902906	0.494376308643183	2.82438289594169	0.00473717554725348	0.0361431382599742
AT1G15270	226.361639874074	0.88200616733613	0.312316363766961	2.82407926596587	0.0047416656601709	0.0361523254284132
AT2G46580	613.851755221966	0.636445788294347	0.225617024845247	2.82091206871862	0.0047887327011728	0.0364858983229246
AT1TE42205	1915.45491929743	0.602038970983407	0.21377174712976	2.81627005938239	0.00485848076679395	0.036991699236171
AT2G17440	2076.72610545074	-3.1156792063669	1.1067837030188	-2.8150750664911	0.0048765841454037	0.0371038580689706
AT4G24570	562.578644901099	-0.613161654636176	0.217935318387467	-2.81350291991699	0.0049004941099955	0.0372600111943127
AT3G44010	42.9771063054186	1.57288009922235	0.559265347119238	2.81240399986199	0.00491726993093258	0.037361742942072
AT3G20865	306408.545682038	0.461084960893942	0.164090636830944	2.80994071202843	0.00495506269431529	0.0376229121896873
AT1G17080	156.401106956389	0.942313608342636	0.335671135103461	2.80725242595612	0.00499660708454015	0.0379121869959384
AT1G26480	4030.9917113125	0.589789014560484	0.210133933996185	2.80672903868631	0.00500473197225089	0.0379375969078036
AT2G24860	119.469869397335	0.946975649769607	0.337411158449578	2.80659256831046	0.00500685245502007	0.0379375969078036
AT3G53075	51.7523964250334	1.54677874641093	0.551286478251624	2.80576217163254	0.00501977271526342	0.0380093182473009
AT1G47380	7431.21373089133	-0.446270149418142	0.159140961351463	-2.80424439835168	0.00504346589389192	0.0381624565093528
AT5TE50565	131.82835147874	0.872845916030033	0.31147611532549	2.80228843588188	0.00507414850562722	0.0383682349545778
AT4G32150	11618.7985968672	-0.446485187278157	0.159420454585356	-2.80067691714618	0.00509955460104802	0.0385338596983038
AT3G51990	295.246701218237	0.733129239013737	0.261823838992471	2.80008589681866	0.00510890100015242	0.0385551526901005
AT3G41768	16374.4299317774	-0.441262727581256	0.157590704569395	-2.80005555395525	0.00510938125996787	0.0385551526901005
AT2G34920	71.042155583793	1.18826970071288	0.424597915720096	2.79857638655065	0.00513284271736445	0.038705644671997
AT3G18220	29585.9658009649	0.437895538580425	0.156572311705486	2.79676229986379	0.00516174932259615	0.0388967269613904
AT5G03740	114.85333984871	-1.05031903269128	0.375577642040373	-2.79654301833647	0.00516525341670527	0.0388967269613904
AT4G26910	762.927867012786	0.585957599090205	0.209595524763632	2.79565892330482	0.0051794029707684	0.0389766015625129
AT5G39420	64023.8622541183	-0.441390684834981	0.158082532140733	-2.79215343313221	0.00523585221515589	0.0393744675810972
AT5G57360	499.561755526126	-0.687735809683552	0.246359881624325	-2.7915901125991	0.00524497507683819	0.039416131007769
AT2TE12310	31.9327012539416	1.75943810834655	0.630366476092372	2.79113527618611	0.00525235153561185	0.0394177159582548
AT2TE12315	31.9327012539416	1.75943810834655	0.630366476092372	2.79113527618611	0.00525235153561185	0.0394177159582548
AT1G11890	1314.0533454107	0.592296943320584	0.21222455525461	2.79089732387468	0.00525621433809263	0.0394198160515986
AT2G42005	13569.1449411876	-0.566585238200715	0.203041031741366	-2.7904962526118	0.00526273094309601	0.0394418023405602
AT2G31425	2124.76714684775	0.731930410706979	0.262449471458711	2.78884315003136	0.00528966765339545	0.0396166940249535
AT3G06190	6062.3022109396	-0.63440548515821	0.227558004113593	-2.78788473132119	0.00530534171036539	0.0397070540798912
AT2TE41450	733.806896417144	0.675270441882767	0.242309530441995	2.78680925447304	0.00532298008254173	0.0398119829151082
AT2G03270	472.500217232961	-0.648726043869481	0.232892287687851	-2.78551965077941	0.00534420006217413	0.0399354874715012
AT4G07990	286.060139611658	0.750723586009919	0.269524328541828	2.78536483170725	0.00534675268546821	0.0399354874715012
AT1G47980	17.4596622965241	2.42970767144388	0.873573849824997	2.7813420375743	0.00541346683209932	0.0404063514835527
AT2G37980	5706.27838582246	-0.455342239597695	0.163774910243906	-2.78029301875095	0.00543098689097395	0.0405096391691494
AT1G73530	436.279852732346	-0.697736591088667	0.251001539626663	-2.77981000485684	0.00543907108603194	0.0405394186239956
AT2G33730	123.333609592076	-0.900915129051733	0.324115152083865	-2.77961435390907	0.00544234878273418	0.0405394186239956
AT5G59370	19631.9579012988	0.517157637980816	0.18614261924072	2.7782871009891	0.0054646310724431	0.0406778559262645
AT5G48335	70.8241341383559	1.16166309645151	0.4183644486001	2.7766773690704	0.00549176618412608	0.0408522052452706
AT5G55490	7856.99420125469	-0.582778102410557	0.210034317043249	-2.77468039801588	0.00552559794282888	0.041062582270953
AT2G44900	216.37289461342	-0.790540441864449	0.284923818620589	-2.7745677623293	0.00552751175634261	0.041062582270953
AT4G38740	145.439474909571	0.925202975849964	0.333583900465417	2.77352406563722	0.00554527387077231	0.0411486055329261
AT3TE00350	29.3998532982122	-1.74242052388921	0.628250672897696	-2.77344792302824	0.00554657171471818	0.0411486055329261
AT2G42160	138.696859505036	0.944844833087859	0.340715223999335	2.77312185231178	0.00555213266174555	0.0411621048143696
AT2G38740	268.407923960824	0.692162020371461	0.250063595410915	2.76794396734987	0.0056411153419267	0.0417936370315674
AT1G21070	404.854070212746	-0.628188280117484	0.227035823222293	-2.76691260084722	0.00565899241739927	0.0418978698359534
AT4G21150	15.9006158791558	2.66876260556182	0.964983206653721	2.76560523246442	0.00568172698235703	0.0420379019905125
AT1G04300	10766.5788775222	-0.447960179055832	0.16217127216144	-2.76226592469406	0.0057401704896865	0.0424417713222654
AT1G76390	40.9100657198312	1.52935464738171	0.553845064693421	2.76134021024142	0.00575646774345036	0.0425336857712833
AT3G60500	17.8882363737576	2.38408060859792	0.863553499502435	2.76077928000012	0.00576636324066494	0.042578206962279
AT1G15100	31.9596802258217	-1.67353246025915	0.606313577760202	-2.76017645265572	0.00577701495181263	0.0426065773793686
AT3TE00130	9159.59487430035	-0.684972475472472	0.248167324667859	-2.76012354321514	0.0057779506862405	0.0426065773793686
AT3G13065	16685.1626058609	-0.4303871640875	0.155943155323236	-2.75989775373854	0.00578194544150635	0.0426074773928016
AT2G20830	1209.9493504702	0.550143372782056	0.19945141643334	2.75828260646082	0.00581059395280863	0.0427899294971891
AT2G28620	441.361449795882	0.687587763341898	0.249319979668368	2.75785263682634	0.00581824203394227	0.0427925709430711
AT1TE43430	48.139008457885	1.55981079806035	0.565594527200822	2.75782512567791	0.00581873169704003	0.0427925709430711
AT1G76400	21.3796601595572	-2.06144925939588	0.747964014261599	-2.75608080080026	0.0058498543994409	0.0429703150483979
AT4TE09420	2223.15076564055	0.47375631391726	0.171897919139044	2.75603286118927	0.00585071186534267	0.0429703150483979
AT5G49160	1964.39909946902	-0.602488779792377	0.218678249119958	-2.75513811829487	0.00586673637782178	0.0430592619271482
AT3G47836	57.1023562503655	1.37683600245001	0.499822651479616	2.75464907077377	0.00587551174857316	0.0430698788654282
AT5G41210	84.8553407264795	1.27924646244137	0.464400138470045	2.75462119080287	0.00587601237747752	0.0430698788654282
AT5G05365	41.1311724516216	1.50770715787979	0.547580329412416	2.75339904831433	0.00589799569614813	0.0431691540408213
AT3G55410	890.341194782232	0.578088074636627	0.20995526454172	2.75338689838738	0.00589821461489694	0.0431691540408213
AT1G06700	28397.3771074028	-0.440859602122894	0.160125430001298	-2.75321416541596	0.00590132772926697	0.0431691540408213
AT2G47730	887.373742040103	1.35665361739745	0.493041206684334	2.75160290662285	0.00593043837661937	0.0433532777538647
AT5TE33555	63.5666816099424	1.3223919508723	0.48080157661296	2.75039021333495	0.00595243341799909	0.0434851742794329
AT3G23727	24.6403199228987	2.27757738768869	0.828324117961598	2.74962099774848	0.00596642302463301	0.0435584513052504
AT5G39870	2828.15629915535	1.34856820260778	0.490518798664434	2.74926915396436	0.00597283182338113	0.0435763234223071
AT3G21930	27.996833299464	1.87086716568539	0.680904036333912	2.74762237533268	0.00600291026354435	0.0437667453409642
AT2G20820	761.34806981769	0.60055884014693	0.21864679214348	2.74670775756377	0.00601967465638696	0.0438112519279758
AT4G35260	260.285585616817	0.735821720889964	0.267898591001473	2.74664274320845	0.0060208679345513	0.0438112519279758
AT5G21274	470.303005779715	0.609070417935448	0.221751279349729	2.74663767316926	0.00602096099937278	0.0438112519279758
AT4G13420	112.322502427367	0.959383746968727	0.349389412197677	2.74588671973244	0.00603475969990665	0.0438826346453225
AT1G78570	441.245775443546	-0.625235738276291	0.227770642603302	-2.74502337584057	0.00605065876385953	0.0439398517957461
AT3G53220	53.3031494683835	1.26981538600413	0.462600370912165	2.74495107623949	0.00605199192087424	0.0439398517957461
AT5G08610	1174.06374808066	-0.698219972068606	0.254378331217875	-2.74480915385274	0.0060546096457327	0.0439398517957461
AT3G17940	218.722765042507	0.762077950527805	0.277739789008143	2.74385587045096	0.00607221918332727	0.0440385995088772
AT5G55820	21.456628638349	-2.06530362605705	0.752870917455697	-2.74323735739013	0.00608366933582594	0.0440659696848801
AT4G24840	57.336518473951	-1.43149784755234	0.521831353261855	-2.74321931521431	0.00608400363127911	0.0440659696848801
AT2G01480	1460.45119544395	-0.533994341605756	0.194741808883882	-2.74206316900425	0.00610545988259745	0.0441922826502218
AT4G20210	38.8073132627183	-1.61140648082567	0.587777760807077	-2.74152339246903	0.006115500601942	0.0442358564250926
AT1G44770	171.363829953092	0.883004117442369	0.322219910532553	2.74037726589575	0.00613686974545041	0.0443612621152729
AT2TE06350	37.1993693535176	1.60566751945663	0.586053379142217	2.73979739150516	0.00614770690541962	0.0444104211250339
AT3G17630	132.511675307537	-1.00269311193914	0.366115534643876	-2.73873413460717	0.00616762268806474	0.0445250556522889
AT1G36920	147.122100043272	0.863912547620572	0.315610047851446	2.7372783392093	0.00619498530782983	0.0446932644962254
AT3G50310	9159.23976815185	-0.611501985959792	0.223637955953063	-2.7343390049949	0.0062505653850445	0.0450646922452553
AT2G29560	47.5570597607115	1.38818243686323	0.507840298501295	2.73350193153231	0.00626647558020084	0.0451498129229664
AT2TE06345	48.0044264395666	1.38876321715578	0.50826285316172	2.73237205614533	0.00628800885306435	0.0452753098176793
AT3G45040	947.226116822871	-0.583721768537618	0.21371185563847	-2.73134949295972	0.00630755435078704	0.0453863394161929
AT1G77440	23.6034958120761	1.93972324227099	0.710383537460357	2.73052955197351	0.00632326636820541	0.0454349937552925
AT5G59150	272.815013017942	0.760136446538788	0.278399166125186	2.73038334531858	0.00632607173279722	0.0454349937552925
AT1G16030	172.614415283451	-1.0719490338971	0.392633727521172	-2.73015015970398	0.00633054833874173	0.0454349937552925
AT2G41160	157.365565682297	0.934592514192555	0.342324622242066	2.73013523850961	0.00633083488700812	0.0454349937552925
AT1G72740	402.657799966712	-2.92573967515485	1.07179476320641	-2.72975738974701	0.006338095028104	0.0454574455666233
AT4G15840	115.922892278401	-0.899608591313013	0.329668278523278	-2.72882970525019	0.00635595173077476	0.0455558182032468
AT5G16510	1034.68365524533	0.516944667019273	0.189455606305521	2.72857941287646	0.00636077727783293	0.0455607237048945
AT1G35510	147.388429203786	1.04579705897688	0.383380665894591	2.72782941867083	0.00637525664398415	0.0456347258276601
AT5G26030	94.4712330332255	-1.12746175148516	0.41348485426712	-2.72673047114028	0.00639652646539196	0.0457572068740197
AT5G57690	5153.08931559782	-0.444085630361911	0.162926134624182	-2.72568689723275	0.00641678363113779	0.0458722894800377
AT3G02790	26.9090430569566	-1.79732373474547	0.65954431551491	-2.72509927303715	0.00642821558752925	0.0459241739571408
AT1G50740	56.3998661528532	1.31796462057713	0.48450326802561	2.72023886639184	0.00652347738967344	0.0465620873533611
AT1G31840	93.065449452777	-0.990087259732804	0.363987618190248	-2.72011247156025	0.00652597152325784	0.0465620873533611
AT4G00120	18.9298248324005	2.16573342404235	0.796884250028931	2.71775157303426	0.00657271674388654	0.0468652168608164
AT1G12780	267.698610413944	-0.716152401767803	0.263554044677911	-2.71728860258249	0.00658191868289403	0.0469004335163213
AT2G39890	15931.8005495353	0.432227925915722	0.159205639715759	2.71490335824415	0.00662951133195044	0.0472089861968406
AT5G21020	862.994618562988	-0.515401975730788	0.189928965027272	-2.71365652762221	0.0066545122204321	0.0473563670434631
AT5G04170	9637.74093167837	-0.499930067134307	0.184413628390104	-2.71091714586715	0.00670973901418377	0.0477185188326114
AT1G28540	1274.13894550819	0.540283126346164	0.199348052065816	2.71025034228971	0.0067232441786327	0.0477836772954244
AT1G02970	43.5772237598934	-1.48269894705107	0.547199055737743	-2.70961532463185	0.00673612827330081	0.0478443403891902
AT5G42820	80.7569953503832	1.04084795978679	0.384210972980344	2.7090531842776	0.00674755224855007	0.0478945611861599
AT1G52825	67.6469837590874	1.23345556082634	0.45546452712611	2.70812651121087	0.00676642237795287	0.0479975364295535
AT5G02230	1541.18299131032	0.625166724689447	0.230930383748523	2.70716531337963	0.00678604564478462	0.0481057179020106
AT5G58000	14.9012171000091	-2.50547186905721	0.925811186983542	-2.70624497120248	0.00680488273932307	0.0482081905331825
AT4G34920	625.90362260011	-0.557338228104725	0.205969814035592	-2.70592188818705	0.00681150657238353	0.0482240639056394
AT5G59140	26.5873984758229	1.77617319322143	0.656536475439714	2.70536864236193	0.00682286264927974	0.0482733986285374
AT1G65240	2655.68787412819	-0.469460006878271	0.173584716040421	-2.70450082004312	0.00684071008583243	0.0483685683575375
AT2G24103	30.2511063047484	-1.75981677328887	0.6511061011126	-2.70281106302294	0.00687558164925644	0.0485839109217209
AT3G15820	21.2984765551618	2.08653197048205	0.772142656340525	2.70226227413845	0.00688694133018868	0.048624705581809
AT1G03960	266.033058479449	0.686399694021372	0.254024037926837	2.7021052795762	0.00689019414670426	0.048624705581809
AT5G15880	331.167958052077	0.692120613147635	0.256263880659141	2.70081219158712	0.00691703856361088	0.0487828578697737
AT3G21880	180.522989933824	0.94000588902718	0.348336851911581	2.69855424101319	0.00696413880396896	0.0490835715062565
AT1G23260	166.46308155998	0.905202391289976	0.335547568266277	2.69768723393532	0.00698230074454593	0.0491800722096635
AT5G64480	284.008080898431	-0.699342459489397	0.259283461008733	-2.6972119886422	0.00699227415483948	0.0492085897198365
AT3G17820	68.3224931529338	1.25400413985447	0.464950851104718	2.69706816725891	0.00699529488473226	0.0492085897198365
AT1G12080	46.2893784265211	1.89445507442628	0.702473275173711	2.69683579629105	0.00700017792855455	0.0492114744855957
AT2TE08165	86.4241674492853	-1.25443455825707	0.465226785385992	-2.69639366791033	0.00700947726907403	0.0492453824485009
AT5G53750	119.313828507776	0.950639936285524	0.352623651565435	2.69590520109828	0.00701976414965944	0.0492792414767638
AT1G63500	397.518481326686	-0.58694298410749	0.21773725908225	-2.69564789499703	0.0070251883446402	0.0492792414767638
AT5G20810	2343.2957210553	-0.43620903754981	0.161826984349861	-2.69552719716232	0.00702773403717892	0.0492792414767638
AT1G64150	14.0485425447604	-2.70715278406018	1.00445702201355	-2.6951404835952	0.00703589596760806	0.0493050493220534
AT5G35680	743.783171677555	0.576061515871486	0.213804102430601	2.69434266846433	0.00705276145955296	0.0493917769433492
AT3G49420	39.4539264428436	1.5784148653789	0.585978330389585	2.69364033364425	0.00706763857139744	0.0494644780932027
AT5G23900	22.5958047919125	2.15949291710703	0.802712938637423	2.69024306593674	0.00713999927367654	0.0499391430444942

## Sheet: DESeq RNA SC-RTL1
Genes and TEs deregulated in SC-RTL1
	baseMean	log2FoldChange	lfcSE	stat	pvalue	padj
AT5G07250	207.223590282374	-1.99675734958407	0.313259864045525	-6.37412442116712	1.84011161699978e-10	2.76853568902402e-06
AT4G15417	103.925177658139	9.50473557262243	1.49418505639275	6.36115020154777	2.00248503780986e-10	2.76853568902402e-06
AT1G67090	57.7194010104237	3.13859243654753	0.625996386650336	5.01375487699206	5.33779797376121e-07	0.0049198483924157
AT2G39240	132.467910310307	23.1294577541958	4.7849980479955	4.83374444925532	1.33988568456844e-06	0.00926229476600051
AT4G35170	665.816181051201	1.04911357123237	0.231834289159959	4.52527352633548	6.03174427470424e-06	0.0333567521879694
AT5G25590	234.93027274642	-1.40066419251176	0.316227052423132	-4.42929908045178	9.45398418900132e-06	0.0435686861350126
